# Supplementary material for: Differential Genes Expression between Fertile and Infertile Spermatozoa Revealed by Transcriptome Analysis
Source: PLoS One. 2015 May 14;10(5):e0127007. doi: 10.1371/journal.pone.0127007 (PMC4431685; doi:10.1371/journal.pone.0127007)
Supplement: S3 Table — Supplementary data on co-expression gene network analysis when three groups were compared together (feature parameter set = 5000). (XLSX) [file pone.0127007.s009.xlsx]

## Sheet: Total component =67
Gene co-expression network analysis
		Total connected component =67
Co-expression gene list
Connected component 1
Affimetrix probeset id	Official gene symbol	Species	David Gene Name
7979179	ERO1L	Homo sapiens	ERO1-like (S. cerevisiae)
7922293	RNY4P7, LOC100271832, RNY5P10, RNY1, LOC100132111, RNY4P19, RNY3, RNY4	Homo sapiens	hypothetical LOC100271832; RNA, Ro-associated Y5 pseudogene 10; RNA, Ro-associated Y1; RNA, Ro-associated Y4 pseudogene 7; RNA, Ro-associated Y4 pseudogene 19; RNA, Ro-associated Y3; hypothetical LOC100132111; RNA, Ro-associated Y4
7929593	RPL13AP7, RPL13AP18, RPL13A, RPL13AP16, RPL13AP5	Homo sapiens	ribosomal protein L13a pseudogene 7; ribosomal protein L13a pseudogene 5; ribosomal protein L13a pseudogene 16; ribosomal protein L13a; ribosomal protein L13a pseudogene 18
7896434	Rps5	Homo sapiens	ribosomal protein S5
7896438	Rhoa	Homo sapiens	ras homolog gene family, member A
7930714	ATRNL1	Homo sapiens	attractin-like 1
8074737	LOC653264, LOC284861, LOC729461, LOC653135	Homo sapiens	hypothetical LOC729461; hypothetical LOC653264; hypothetical LOC653135; hypothetical LOC284861
8173825	RPS6KA6	Homo sapiens	ribosomal protein S6 kinase, 90kDa, polypeptide 6
8053386	LOC647302, LSM3	Homo sapiens	LSM3 homolog, U6 small nuclear RNA associated (S. cerevisiae); similar to Lsm3 protein
8173823	RNU6-2, RNU6-1	Homo sapiens	RNA, U6 small nuclear 2; RNA, U6 small nuclear 1
8142329	C7orf66	Homo sapiens	chromosome 7 open reading frame 66
7994006	LOC595101, LOC440354	Homo sapiens	PI-3-kinase-related kinase SMG-1 pseudogene
8138361	RPL36A, RPL36AP51, RPL36AP49,Hnrnph2, RPL36AP37	Homo sapiens	ribosomal protein L36a pseudogene 51; ribosomal protein L36a pseudogene 37; ribosomal protein L36a pseudogene 49; heterogeneous nuclear ribonucleoprotein H2 (H'); ribosomal protein L36a
7989146	MNS1	Homo sapiens	meiosis-specific nuclear structural 1
8091910	serpini2	Homo sapiens	serpin peptidase inhibitor, clade I (pancpin), member 2
7893103	Canx	Homo sapiens	calnexin
7989144	RNU6-2, RNU6-1	Homo sapiens	RNA, U6 small nuclear 2; RNA, U6 small nuclear 1
8067944	MIRLET7C	Homo sapiens	microRNA let-7c
7903092	fnbp1l	Homo sapiens	formin binding protein 1-like
8111533	Lmbrd2	Homo sapiens	LMBR1 domain containing 2
7892900	RpL30	Homo sapiens	ribosomal protein L30
7956269	RNU6-2, RNU6-1	Homo sapiens	RNA, U6 small nuclear 2; RNA, U6 small nuclear 1
8132830	RNU6-2, RNU6-1	Homo sapiens	RNA, U6 small nuclear 2; RNA, U6 small nuclear 1
7917645	RN28S1	Homo sapiens	28S ribosomal RNA
8138773	eif4h	Homo sapiens	eukaryotic translation initiation factor 4H
7942586	rps3	Homo sapiens	ribosomal protein S3 pseudogene 3; ribosomal protein S3
7942586	RPS3P3	Homo sapiens	ribosomal protein S3 pseudogene 3; ribosomal protein S3
8127180	HMGCLL1	Homo sapiens	3-hydroxymethyl-3-methylglutaryl-Coenzyme A lyase-like 1
7896468	PARK7	Homo sapiens	Parkinson disease (autosomal recessive, early onset) 7
7901765	HOOK1	Homo sapiens	hook homolog 1 (Drosophila)
7893910	Prpf8	Homo sapiens	PRP8 pre-mRNA processing factor 8 homolog (S. cerevisiae)
8008817	RNY4P7, LOC100271832, RNY5P10, RNY1, LOC100132111, RNY4P19, RNY3, RNY4	Homo sapiens	hypothetical LOC100271832; RNA, Ro-associated Y5 pseudogene 10; RNA, Ro-associated Y1; RNA, Ro-associated Y4 pseudogene 7; RNA, Ro-associated Y4 pseudogene 19; RNA, Ro-associated Y3; hypothetical LOC100132111; RNA, Ro-associated Y4
8058866	tnp1	Homo sapiens	transition protein 1 (during histone to protamine replacement)
7948894	RNU2-2, RNU2-1	Homo sapiens	RNA, U2 small nuclear 1; RNA, U2 small nuclear 2
7991088	LOC80154	Homo sapiens	hypothetical LOC80154
8126860	MUT	Homo sapiens	methylmalonyl Coenzyme A mutase
7917634	HFM1	Homo sapiens	HFM1, ATP-dependent DNA helicase homolog (S. cerevisiae)
7974771	C14orf135	Homo sapiens	chromosome 14 open reading frame 135
7909146	Fam72a, FAM72D	Homo sapiens	family with sequence similarity 72, member D; family with sequence similarity 72, member A
7965436	EEA1	Homo sapiens	early endosome antigen 1
7922268	KIFAP3	Homo sapiens	kinesin-associated protein 3
8067985	ncam2	Homo sapiens	neural cell adhesion molecule 2
8083737	MIR15B	Homo sapiens	microRNA 15b
8023605	Pign	Homo sapiens	phosphatidylinositol glycan anchor biosynthesis, class N
7906574	SUMO1P3, Sumo1	Homo sapiens	SMT3 suppressor of mif two 3 homolog 1 (S. cerevisiae); SUMO1 pseudogene 3
7953765	RIMKLB	Homo sapiens	ribosomal modification protein rimK-like family member B
7928815	RNU6-2 RNU6-1	Homo sapiens	RNA, U6 small nuclear 2; RNA, U6 small nuclear 1
7895358	LOC644101, CBX3	Homo sapiens	similar to chromobox homolog 3; chromobox homolog 3 (HP1 gamma homolog, Drosophila)
8112258	RNU6-2, RNU6-1	Homo sapiens	RNA, U6 small nuclear 2; RNA, U6 small nuclear 1
7983630	Fgf7, LOC100132771,FGF7P2	Homo sapiens	hypothetical LOC100132771; fibroblast growth factor 7 (keratinocyte growth factor); fibroblast growth factor 7 pseudogene 2
8139458	LOC100128364	Homo sapiens	hypothetical LOC100128364
8111991	RNU6-2, RNU6-1	Homo sapiens	RNA, U6 small nuclear 2; RNA, U6 small nuclear 1
8113305	CHD1	Homo sapiens	chromodomain helicase DNA binding protein 1
8052733	WDR92	Homo sapiens	WD repeat domain 92
7893923	RPL24P6	Homo sapiens	ribosomal protein L24; ribosomal protein L24 pseudogene 6
8091550	KIAA1328	Homo sapiens	KIAA1328
8132843	haus6	Homo sapiens	HAUS augmin-like complex, subunit 6
8055913	Prpf40a	Homo sapiens	PRP40 pre-mRNA processing factor 40 homolog A (S. cerevisiae)
7967563	UBC	Homo sapiens	ubiquitin C
8044684	RNU6-2, RNU6-1	Homo sapiens	RNA, U6 small nuclear 2; RNA, U6 small nuclear 1
8084016	PIK3CA	Homo sapiens	phosphoinositide-3-kinase, catalytic, alpha polypeptide
7961243	TAS2R8	Homo sapiens	taste receptor, type 2, member 8
7917612	HFM1	Homo sapiens	HFM1, ATP-dependent DNA helicase homolog (S. cerevisiae)
7961249	TAS2R10	Homo sapiens	taste receptor, type 2, member 10
8055151	POTEE	Homo sapiens	POTE ankyrin domain family, member E
7893933	KARS	Homo sapiens	lysyl-tRNA synthetase
7917004	Lrriq3	Homo sapiens	leucine-rich repeats and IQ motif containing 3
7917002	RN5S10, RN5S11, RN5S12,RN5S13,RN5S14,RN5S15,RN5S16,RN5S6, RN5S7,RN5S8,RN5S9,RN5S2,RN5S3,RN5S4,RN5S5,RN5S1,RN5S17	Homo sapiens	RNA, 5S ribosomal 9; RNA, 5S ribosomal 13; RNA, 5S ribosomal 12; RNA, 5S ribosomal 11; RNA, 5S ribosomal 10; RNA, 5S ribosomal 17; RNA, 5S ribosomal 16; RNA, 5S ribosomal 15; RNA, 5S ribosomal 14; RNA, 5S ribosomal 1; RNA, 5S ribosomal 2; RNA, 5S ribosomal 3; RNA, 5S ribosomal 4; RNA, 5S ribosomal 5; RNA, 5S ribosomal 6; RNA, 5S ribosomal 7; RNA, 5S ribosomal 8
8027932	COX6B1	Homo sapiens	cytochrome c oxidase subunit Vib polypeptide 1 (ubiquitous)
7937476	RPLP2P3,RPLP2	Homo sapiens	ribosomal protein, large, P2 pseudogene 3; ribosomal protein, large, P2
7896499	Myst2, LOC648927	Homo sapiens	MYST histone acetyltransferase 2; similar to MYST histone acetyltransferase 2
8065868	eIF6	Homo sapiens	eukaryotic translation initiation factor 6
7896498	2014-09-02	Homo sapiens	septin 2
8092185	RNU4-2,RNU4-1, RNU4-1B	Homo sapiens	RNA, U4 small nuclear 2; RNA, U4 small nuclear 1; RNA, U4 small nuclear 1B
7896493	YY1	Homo sapiens	YY1 transcription factor
8129728	Ahi1	Homo sapiens	Abelson helper integration site 1
8044698	RNU2-2, RNU2-1	Homo sapiens	RNA, U2 small nuclear 1; RNA, U2 small nuclear 2
8005471	RPS28P6, RPS28, RPS28P9	Homo sapiens	ribosomal protein S28 pseudogene 6; ribosomal protein S28 pseudogene 9; ribosomal protein S28
7893133	RPL18	Homo sapiens	ribosomal protein L18
7893139	EIF4G2	Homo sapiens	eukaryotic translation initiation factor 4 gamma, 2
7893138	HSP90AB1	Homo sapiens	heat shock protein 90kDa alpha (cytosolic), class B member 1
7899346	LOC728416, CCDC72, LOC29973, ZNF259	Homo sapiens	coiled-coil domain containing 72; hypothetical LOC729973; hypothetical LOC728416
8069174	c21orf70, LOC729774, LOC729535	Homo sapiens	chromosome 21 open reading frame 70; hypothetical LOC729774; hypothetical LOC729535
7893956	LOC100131310	Homo sapiens	hypothetical protein LOC100131310
7974737	LRRC9	Homo sapiens	leucine rich repeat containing 9
8119993	HSP90AB1	Homo sapiens	heat shock protein 90kDa alpha (cytosolic), class B member 1
7895312	LOC644063,HNRNPK	Homo sapiens	heterogeneous nuclear ribonucleoprotein K; similar to heterogeneous nuclear ribonucleoprotein K
7893966	hnrnpm	Homo sapiens	heterogeneous nuclear ribonucleoprotein M
7978536	RNU6-2, RNU6-1	Homo sapiens	RNA, U6 small nuclear 2; RNA, U6 small nuclear 1
7893196	Hnrnpc	Homo sapiens	heterogeneous nuclear ribonucleoprotein C (C1/C2)
8036363	RNY4P7, LOC100271832, RNY5P10, RNY1, LOC100132111, RNY4P19, RNY3, RNY4	Homo sapiens	hypothetical LOC100271832; RNA, Ro-associated Y5 pseudogene 10; RNA, Ro-associated Y1; RNA, Ro-associated Y4 pseudogene 7; RNA, Ro-associated Y4 pseudogene 19; RNA, Ro-associated Y3; hypothetical LOC100132111; RNA, Ro-associated Y4
8085579	RNU6-2, RNU6-1	Homo sapiens	RNA, U6 small nuclear 2; RNA, U6 small nuclear 1
7983679	Ap4e1	Homo sapiens	adaptor-related protein complex 4, epsilon 1 subunit
8013272	CCDC144B, CCDC144C, CCDC144A	Homo sapiens	coiled-coil domain containing 144B; coiled-coil domain containing 144A; coiled-coil domain containing 144C
8043100	TMSB10	Homo sapiens	thymosin beta 10
8030076	Spaca4	Homo sapiens	sperm acrosome associated 4
7893958	SNORD58B,SNORD58A,SNORD58C,U58	Homo sapiens	U58 small nucleolar RNA; small nucleolar RNA, C/D box 58C; small nucleolar RNA, C/D box 58A; small nucleolar RNA, C/D box 58B
7893582	EIF4G2	Homo sapiens	eukaryotic translation initiation factor 4 gamma, 2
8016213	RN5S10, RN5S11, RN5S12,RN5S13,RN5S14,RN5S15,RN5S16,RN5S6, RN5S7,RN5S8,RN5S9,RN5S2,RN5S3,RN5S4,RN5S5,RN5S1,RN5S17	Homo sapiens	RNA, 5S ribosomal 9; RNA, 5S ribosomal 13; RNA, 5S ribosomal 12; RNA, 5S ribosomal 11; RNA, 5S ribosomal 10; RNA, 5S ribosomal 17; RNA, 5S ribosomal 16; RNA, 5S ribosomal 15; RNA, 5S ribosomal 14; RNA, 5S ribosomal 1; RNA, 5S ribosomal 2; RNA, 5S ribosomal 3; RNA, 5S ribosomal 4; RNA, 5S ribosomal 5; RNA, 5S ribosomal 6; RNA, 5S ribosomal 7; RNA, 5S ribosomal 8
8128329	c6orf167	Homo sapiens	chromosome 6 open reading frame 167
7972190	RBM26	Homo sapiens	RNA binding motif protein 26
7978527	C14orf126	Homo sapiens	chromosome 14 open reading frame 126
8105409	RN5S10, RN5S11, RN5S12,RN5S13,RN5S14,RN5S15,RN5S16,RN5S6, RN5S7,RN5S8,RN5S9,RN5S2,RN5S3,RN5S4,RN5S5,RN5S1,RN5S17	Homo sapiens	RNA, 5S ribosomal 9; RNA, 5S ribosomal 13; RNA, 5S ribosomal 12; RNA, 5S ribosomal 11; RNA, 5S ribosomal 10; RNA, 5S ribosomal 17; RNA, 5S ribosomal 16; RNA, 5S ribosomal 15; RNA, 5S ribosomal 14; RNA, 5S ribosomal 1; RNA, 5S ribosomal 2; RNA, 5S ribosomal 3; RNA, 5S ribosomal 4; RNA, 5S ribosomal 5; RNA, 5S ribosomal 6; RNA, 5S ribosomal 7; RNA, 5S ribosomal 8
8095543	RNU6-2, RNU6-1	Homo sapiens	RNA, U6 small nuclear 2; RNA, U6 small nuclear 1
7895308	EIF4G2	Homo sapiens	eukaryotic translation initiation factor 4 gamma, 2
8057599	TFPI	Homo sapiens	tissue factor pathway inhibitor (lipoprotein-associated coagulation inhibitor)
8098326	RN7SL1,RN7SL2	Homo sapiens	RNA, 7SL, cytoplasmic 2; RNA, 7SL, cytoplasmic 1
8159815	CBWD1,CBWD6	Homo sapiens	COBW domain containing 6; COBW domain containing 1
8088986	pou1f1	Homo sapiens	POU class 1 homeobox 1
8103542	RNY4P7, LOC100271832, RNY5P10, RNY1, LOC100132111, RNY4P19, RNY3, RNY4	Homo sapiens	hypothetical LOC100271832; RNA, Ro-associated Y5 pseudogene 10; RNA, Ro-associated Y1; RNA, Ro-associated Y4 pseudogene 7; RNA, Ro-associated Y4 pseudogene 19; RNA, Ro-associated Y3; hypothetical LOC100132111; RNA, Ro-associated Y4
7974303	tmx1	Homo sapiens	thioredoxin-related transmembrane protein 1
7934278	P4HA1	Homo sapiens	prolyl 4-hydroxylase, alpha polypeptide I
7895331	USP22	Homo sapiens	ubiquitin specific peptidase 22
8046759	DNAJC10	Homo sapiens	DnaJ (Hsp40) homolog, subfamily C, member 10
7971640	RNY4P7, LOC100271832, RNY5P10, RNY1, LOC100132111, RNY4P19, RNY3, RNY4	Homo sapiens	hypothetical LOC100271832; RNA, Ro-associated Y5 pseudogene 10; RNA, Ro-associated Y1; RNA, Ro-associated Y4 pseudogene 7; RNA, Ro-associated Y4 pseudogene 19; RNA, Ro-associated Y3; hypothetical LOC100132111; RNA, Ro-associated Y4
7893564	TRAPPC4	Pan troglodytes	trafficking protein particle complex 4
8019183	ACTG1	Homo sapiens	actin, gamma 1
8120838	ttk	Homo sapiens	TTK protein kinase
8140579	Cacna2d1	Homo sapiens	calcium channel, voltage-dependent, alpha 2/delta subunit 1
7970567	RNY4P7, LOC100271832, RNY5P10, RNY1, LOC100132111, RNY4P19, RNY3, RNY4	Homo sapiens	hypothetical LOC100271832; RNA, Ro-associated Y5 pseudogene 10; RNA, Ro-associated Y1; RNA, Ro-associated Y4 pseudogene 7; RNA, Ro-associated Y4 pseudogene 19; RNA, Ro-associated Y3; hypothetical LOC100132111; RNA, Ro-associated Y4
8177303	RBMY1F,RBMY1J	Homo sapiens	RNA binding motif protein, Y-linked, family 1, member F; RNA binding motif protein, Y-linked, family 1, member J
7895320	2014-09-02	Homo sapiens	septin 2
8155460	LOC643827	Homo sapiens	similar to cell recognition molecule CASPR3
7894699	Fau	Homo sapiens	Finkel-Biskis-Reilly murine sarcoma virus (FBR-MuSV) ubiquitously expressed
8043129	RNU6-2, RNU6-1	Homo sapiens	RNA, U6 small nuclear 2; RNA, U6 small nuclear 1
7895328	HSP90AB1	Homo sapiens	heat shock protein 90kDa alpha (cytosolic), class B member 1
8094476	tbc1d19	Homo sapiens	TBC1 domain family, member 19
7962274	kif21a	Homo sapiens	kinesin family member 21A
8130374	Fbxo5	Homo sapiens	F-box protein 5
8113759	RNY4P7, LOC100271832, RNY5P10, RNY1, LOC100132111, RNY4P19, RNY3, RNY4	Homo sapiens	hypothetical LOC100271832; RNA, Ro-associated Y5 pseudogene 10; RNA, Ro-associated Y1; RNA, Ro-associated Y4 pseudogene 7; RNA, Ro-associated Y4 pseudogene 19; RNA, Ro-associated Y3; hypothetical LOC100132111; RNA, Ro-associated Y4
7895324	RPS10P7,RPS10P11,RPS10P13,RSP10P4,RPS10P22	Homo sapiens	ribosomal protein S10; ribosomal protein S10 pseudogene 4; ribosomal protein S10 pseudogene 11; ribosomal protein S10 pseudogene 22; ribosomal protein S10 pseudogene 7; ribosomal protein S10 pseudogene 13
7908382	Rgs21	Homo sapiens	regulator of G-protein signaling 21
7960131	rps11,RPS11P5	Homo sapiens	ribosomal protein S11 pseudogene 5; ribosomal protein S11
7893160	hnrnpm	Homo sapiens	heterogeneous nuclear ribonucleoprotein M
8141295	ATP5J2	Homo sapiens	ATP synthase, H+ transporting, mitochondrial F0 complex, subunit F2
7894681	ABCF1	Homo sapiens	ATP-binding cassette, sub-family F (GCN20), member 1
8126891	CRISP2	Homo sapiens	cysteine-rich secretory protein 2
7908330	c1orf27	Homo sapiens	chromosome 1 open reading frame 27
8100791	UGT2A1	Homo sapiens	UDP glucuronosyltransferase 2 family, polypeptide A1
7938951	ANO5	Homo sapiens	anoctamin 5
8100382	Chic2	Homo sapiens	cysteine-rich hydrophobic domain 2
7902822	pkn2	Homo sapiens	protein kinase N2
8060986	C20orf187	Homo sapiens	chromosome 20 open reading frame 187
8023154	TCEB3CL2	Homo sapiens	transcription elongation factor B polypeptide 3C-like; transcription elongation factor B polypeptide 3C-like 2; transcription elongation factor B polypeptide 3C (elongin A3)
7971661	MIR16-1	Homo sapiens	microRNA 16-1
7937940	OR52K3P	Homo sapiens	olfactory receptor, family 52, subfamily K, member 3 pseudogene
7979131	GNG2	Pan troglodytes	guanine nucleotide binding protein (G protein), gamma 2
7894672	HSP90AB3P	Homo sapiens	heat shock protein 90kDa alpha (cytosolic), class B member 3 (pseudogene)
8098379	WDR17	Homo sapiens	WD repeat domain 17
8140942	LOC728153,LOC728640,FAM133B	Homo sapiens	family with sequence similarity 133, member B pseudogene; similar to FAM133B protein; family with sequence similarity 133, member B
7894675	Ik	Homo sapiens	similar to CG18005; IK cytokine, down-regulator of HLA II
7894675	LOC644456	Homo sapiens	similar to CG18005; IK cytokine, down-regulator of HLA II
8100784	UGT2B4	Homo sapiens	UDP glucuronosyltransferase 2 family, polypeptide B4
8014749	RPL23P6	Homo sapiens	ribosomal protein L23 pseudogene 6; ribosomal protein L23
7918153	VAV3	Homo sapiens	vav 3 guanine nucleotide exchange factor
7971653	DLEU2L	Homo sapiens	deleted in lymphocytic leukemia 2 (non-protein coding); deleted in lymphocytic leukemia 2-like
8177354	DAZ3	Homo sapiens	deleted in azoospermia 1; deleted in azoospermia 3; deleted in azoospermia 2; deleted in azoospermia 4
8177354	DAZ4,DAZ2,DAZ1	Homo sapiens	deleted in azoospermia 1; deleted in azoospermia 3; deleted in azoospermia 2; deleted in azoospermia 4
8111915	SEPP1	Homo sapiens	selenoprotein P, plasma, 1
7973902	LOC650638,SRP54	Homo sapiens	similar to signal recognition particle 54kDa; signal recognition particle 54kDa
7965867	PMCH	Homo sapiens	pro-melanin-concentrating hormone
7894662	Prpf8	Homo sapiens	PRP8 pre-mRNA processing factor 8 homolog (S. cerevisiae)
7908351	pla2g4a	Homo sapiens	phospholipase A2, group IVA (cytosolic, calcium-dependent)
8020724	DSG1	Homo sapiens	desmoglein 1
8142307	pnpla8	Homo sapiens	patatin-like phospholipase domain containing 8
7894665	ANAPC5	Homo sapiens	anaphase promoting complex subunit 5
7968333	USPL1	Homo sapiens	ubiquitin specific peptidase like 1
8099887	RPL9P25	Homo sapiens	ribosomal protein L9; ribosomal protein L9 pseudogene 25
7917088	PIGK	Homo sapiens	phosphatidylinositol glycan anchor biosynthesis, class K
8135544	FOXP2	Homo sapiens	forkhead box P2
7944525	RNU6-2, RNU6-1	Homo sapiens	RNA, U6 small nuclear 2; RNA, U6 small nuclear 1
7917082	Asb17	Homo sapiens	ankyrin repeat and SOCS box-containing 17
8088915	RNY4P7, LOC100271832, RNY5P10, RNY1, LOC100132111, RNY4P19, RNY3, RNY4	Homo sapiens	hypothetical LOC100271832; RNA, Ro-associated Y5 pseudogene 10; RNA, Ro-associated Y1; RNA, Ro-associated Y4 pseudogene 7; RNA, Ro-associated Y4 pseudogene 19; RNA, Ro-associated Y3; hypothetical LOC100132111; RNA, Ro-associated Y4
8044613	CBWD1,CBWD6	Homo sapiens	COBW domain containing 6; COBW domain containing 1
7918134	Amy1a,AMY1C,AMY1B	Homo sapiens	amylase, alpha 1A (salivary); amylase, alpha 1B (salivary); amylase, alpha 1C (salivary)
8049888	ATG4B	Homo sapiens	ATG4 autophagy related 4 homolog B (S. cerevisiae)
7904166	RNY4P7, LOC100271832, RNY5P10, RNY1, LOC100132111, RNY4P19, RNY3, RNY4	Homo sapiens	hypothetical LOC100271832; RNA, Ro-associated Y5 pseudogene 10; RNA, Ro-associated Y1; RNA, Ro-associated Y4 pseudogene 7; RNA, Ro-associated Y4 pseudogene 19; RNA, Ro-associated Y3; hypothetical LOC100132111; RNA, Ro-associated Y4
8082240	RNY4P7, LOC100271832, RNY5P10, RNY1, LOC100132111, RNY4P19, RNY3, RNY4	Homo sapiens	hypothetical LOC100271832; RNA, Ro-associated Y5 pseudogene 10; RNA, Ro-associated Y1; RNA, Ro-associated Y4 pseudogene 7; RNA, Ro-associated Y4 pseudogene 19; RNA, Ro-associated Y3; hypothetical LOC100132111; RNA, Ro-associated Y4
7911619	GNB1	Homo sapiens	guanine nucleotide binding protein (G protein), beta polypeptide 1
7908347	OCLM	Homo sapiens	oculomedin
7904168	Sycp1	Homo sapiens	synaptonemal complex protein 1
8177331	RBMY1F,RBMY1J	Homo sapiens	RNA binding motif protein, Y-linked, family 1, member F; RNA binding motif protein, Y-linked, family 1, member J
8046790	RNU6-2, RNU6-1	Homo sapiens	RNA, U6 small nuclear 2; RNA, U6 small nuclear 1
7895604	Tceb2	Homo sapiens	transcription elongation factor B (SIII), polypeptide 2 (18kDa, elongin B)
8024299	RPS15P5	Homo sapiens	ribosomal protein S15 pseudogene 5; ribosomal protein S15
8024299	rps15	Homo sapiens	ribosomal protein S15 pseudogene 5; ribosomal protein S15
7896426	LOC645086	Homo sapiens	chromosome 11 open reading frame 58 pseudogene; chromosome 11 open reading frame 58
7896426	C11orf58	Homo sapiens	chromosome 11 open reading frame 58 pseudogene; chromosome 11 open reading frame 58
7895602	psmb2	Homo sapiens	proteasome (prosome, macropain) subunit, beta type, 2
7972175	RNY4P7, LOC100271832, RNY5P10, RNY1, LOC100132111, RNY4P19, RNY3, RNY4	Homo sapiens	hypothetical LOC100271832; RNA, Ro-associated Y5 pseudogene 10; RNA, Ro-associated Y1; RNA, Ro-associated Y4 pseudogene 7; RNA, Ro-associated Y4 pseudogene 19; RNA, Ro-associated Y3; hypothetical LOC100132111; RNA, Ro-associated Y4
8098348	kiaa1712	Homo sapiens	KIAA1712
8040522	MFSD2B	Homo sapiens	hypothetical protein LOC388931
7968711	COG6	Homo sapiens	component of oligomeric golgi complex 6
7899841	Hpca	Homo sapiens	hippocalcin
7895626	LOC390282,EIF3F	Homo sapiens	eukaryotic translation initiation factor 3, subunit F; similar to hCG2040283
7972237	RNU6-2, RNU6-1	Homo sapiens	RNA, U6 small nuclear 2; RNA, U6 small nuclear 1
7951144	CCDC82	Homo sapiens	coiled-coil domain containing 82
8020349	ANKRD20B,ANKRD20A4,LOC284232	Homo sapiens	ankyrin repeat domain 20 family, member A2 pseudogene; ankyrin repeat domain 20B; ankyrin repeat domain 20 family, member A4
8139891	SBDSP1	Homo sapiens	Shwachman-Bodian-Diamond syndrome pseudogene; Shwachman-Bodian-Diamond syndrome
7894638	LOC644063,HNRNPK	Homo sapiens	heterogeneous nuclear ribonucleoprotein K; similar to heterogeneous nuclear ribonucleoprotein K
8020357	ANKRD30BP	Homo sapiens	chromosome 21 open reading frame 110
8048847	AGFG1	Homo sapiens	ArfGAP with FG repeats 1
7894634	RPS11P5	Homo sapiens	ribosomal protein S11 pseudogene 5; ribosomal protein S11
8140532	RNU6-2, RNU6-1	Homo sapiens	RNA, U6 small nuclear 2; RNA, U6 small nuclear 1
8068014	RNU4-2,RNU4-1, RNU4-1B	Homo sapiens	RNA, U4 small nuclear 2; RNA, U4 small nuclear 1; RNA, U4 small nuclear 1B
7931081	plekha1	Homo sapiens	pleckstrin homology domain containing, family A (phosphoinositide binding specific) member 1
7901336	STRADB	Homo sapiens	STE20-related kinase adaptor beta
7894639	STARD7	Homo sapiens	StAR-related lipid transfer (START) domain containing 7
7951131	RN5S10, RN5S11, RN5S12,RN5S13,RN5S14,RN5S15,RN5S16,RN5S6, RN5S7,RN5S8,RN5S9,RN5S2,RN5S3,RN5S4,RN5S5,RN5S1,RN5S17	Homo sapiens	RNA, 5S ribosomal 9; RNA, 5S ribosomal 13; RNA, 5S ribosomal 12; RNA, 5S ribosomal 11; RNA, 5S ribosomal 10; RNA, 5S ribosomal 17; RNA, 5S ribosomal 16; RNA, 5S ribosomal 15; RNA, 5S ribosomal 14; RNA, 5S ribosomal 1; RNA, 5S ribosomal 2; RNA, 5S ribosomal 3; RNA, 5S ribosomal 4; RNA, 5S ribosomal 5; RNA, 5S ribosomal 6; RNA, 5S ribosomal 7; RNA, 5S ribosomal 8
8048835	MFF	Homo sapiens	mitochondrial fission factor
8096538	Rap1gds1	Homo sapiens	RAP1, GTP-GDP dissociation stimulator 1
8163000	RNU6-2, RNU6-1	Homo sapiens	RNA, U6 small nuclear 2; RNA, U6 small nuclear 1
8057615	DIRC1	Homo sapiens	disrupted in renal carcinoma 1
7977507	RPPH1	Homo sapiens	ribonuclease P RNA component H1
7924325	SNORD45C,SNORD45A,SNORD45B	Homo sapiens	small nucleolar RNA, C/D box 45A; small nucleolar RNA, C/D box 45B; small nucleolar RNA, C/D box 45C
7895643	ABCF1	Homo sapiens	ATP-binding cassette, sub-family F (GCN20), member 1
8090801	RN5S10, RN5S11, RN5S12,RN5S13,RN5S14,RN5S15,RN5S16,RN5S6, RN5S7,RN5S8,RN5S9,RN5S2,RN5S3,RN5S4,RN5S5,RN5S1,RN5S17	Homo sapiens	RNA, 5S ribosomal 9; RNA, 5S ribosomal 13; RNA, 5S ribosomal 12; RNA, 5S ribosomal 11; RNA, 5S ribosomal 10; RNA, 5S ribosomal 17; RNA, 5S ribosomal 16; RNA, 5S ribosomal 15; RNA, 5S ribosomal 14; RNA, 5S ribosomal 1; RNA, 5S ribosomal 2; RNA, 5S ribosomal 3; RNA, 5S ribosomal 4; RNA, 5S ribosomal 5; RNA, 5S ribosomal 6; RNA, 5S ribosomal 7; RNA, 5S ribosomal 8
8147650	RNY4P7, LOC100271832, RNY5P10, RNY1, LOC100132111, RNY4P19, RNY3, RNY4	Homo sapiens	hypothetical LOC100271832; RNA, Ro-associated Y5 pseudogene 10; RNA, Ro-associated Y1; RNA, Ro-associated Y4 pseudogene 7; RNA, Ro-associated Y4 pseudogene 19; RNA, Ro-associated Y3; hypothetical LOC100132111; RNA, Ro-associated Y4
8147652	SNORD77	Homo sapiens	small nucleolar RNA, C/D box 77
7902891	ZNF326	Homo sapiens	zinc finger protein 326
8020377	ZNF834	Homo sapiens	zinc finger protein 834
7962312	ABCD2	Homo sapiens	ATP-binding cassette, sub-family D (ALD), member 2
7937959	SNORA62, SNORA62,SNORA62	Homo sapiens	small nucleolar RNA, H/ACA box 62; small nucleolar RNA, H/ACA box 6
8164100	RPL35P2, RPL35P1	Homo sapiens	ribosomal protein L35; ribosomal protein L35 pseudogene 1; ribosomal protein L35 pseudogene 2
7957715	NEDD1	Homo sapiens	neural precursor cell expressed, developmentally down-regulated 1
7902495	NEXN	Homo sapiens	nexilin (F actin binding protein)
7916998	RNU6-2, RNU6-1	Homo sapiens	RNA, U6 small nuclear 2; RNA, U6 small nuclear 1
7956670	USP15	Homo sapiens	ubiquitin specific peptidase 15
7927723	C10orf107	Homo sapiens	chromosome 10 open reading frame 107
8000692	BOLA2B	Homo sapiens	bolA homolog 2 (E. coli); bolA homolog 2B (E. coli)
8020382	ROCK1	Pan troglodytes	Rho-associated, coiled-coil containing protein kinase 1
8180217	Znf626	Homo sapiens	zinc finger protein 626
7924307	SNORD116-17, SNORD116-16, SNORD116-15,SNORD116-14,19,18,20,9,23,8,24,7,21,6,22,5,4,3,2,1,26,29,10,11,12,13	Homo sapiens	small nucleolar RNA, C/D box 116-4; small nucleolar RNA, C/D box 116-3; small nucleolar RNA, C/D box 116-6; small nucleolar RNA, C/D box 116-5; small nucleolar RNA, C/D box 116-2; small nucleolar RNA, C/D box 116-1; small nucleolar RNA, C/D box 116-13; small nucleolar RNA, C/D box 116-12; small nucleolar RNA, C/D box 116-15; small nucleolar RNA, C/D box 116-14; small nucleolar RNA, C/D box 116-17…
7895669	Lect2	Pan troglodytes	leukocyte cell-derived chemotaxin 2
8100819	CSN2	Homo sapiens	casein beta
7892870	ZNF259	Homo sapiens	zinc finger protein 259
7895661	hnrnpm	Homo sapiens	heterogeneous nuclear ribonucleoprotein M
7893559	SNORD18C, SNORD18A,SNORD18B	Homo sapiens	small nucleolar RNA, C/D box 18B; small nucleolar RNA, C/D box 18A; small nucleolar RNA, C/D box 18C
7894114	RPL18	Homo sapiens	ribosomal protein L18
7973985	MIPOL1	Homo sapiens	mirror-image polydactyly 1
7892868	RPL18P13	Homo sapiens	ribosomal protein L18 pseudogene 13
8102877	clgn	Homo sapiens	calmegin
8016259	LRRC37A2	Homo sapiens	leucine rich repeat containing 37, member A2
8180222	CFHR4	Homo sapiens	complement factor H-related 4
7957351	C12orf64	Homo sapiens	chromosome 12 open reading frame 64
7927704	RNY4P7, LOC100271832, RNY5P10, RNY1, LOC100132111, RNY4P19, RNY3, RNY4	Homo sapiens	hypothetical LOC100271832; RNA, Ro-associated Y5 pseudogene 10; RNA, Ro-associated Y1; RNA, Ro-associated Y4 pseudogene 7; RNA, Ro-associated Y4 pseudogene 19; RNA, Ro-associated Y3; hypothetical LOC100132111; RNA, Ro-associated Y4
7929078	Kif20b	Homo sapiens	kinesin family member 20B
8102860	LOC440926, H3F3A,LOC644914,LOC728914,H3F3B	Homo sapiens	H3 histone, family 3B (H3.3B); H3 histone, family 3A pseudogene; H3 histone, family 3A; similar to H3 histone, family 3B; similar to histone H3.3B
8161986	RNU4-2,RNU4-1, RNU4-1B	Homo sapiens	RNA, U4 small nuclear 2; RNA, U4 small nuclear 1; RNA, U4 small nuclear 1B
8125687	Rgl2	Homo sapiens	ral guanine nucleotide dissociation stimulator-like 2
7963878	OR6C70	Homo sapiens	olfactory receptor, family 6, subfamily C, member 70
7892894	psmb2	Homo sapiens	proteasome (prosome, macropain) subunit, beta type, 2
8136159	RNY4P7, LOC100271832, RNY5P10, RNY1, LOC100132111, RNY4P19, RNY3, RNY4	Homo sapiens	hypothetical LOC100271832; RNA, Ro-associated Y5 pseudogene 10; RNA, Ro-associated Y1; RNA, Ro-associated Y4 pseudogene 7; RNA, Ro-associated Y4 pseudogene 19; RNA, Ro-associated Y3; hypothetical LOC100132111; RNA, Ro-associated Y4
7893528	LOC643446,RNPS1	Homo sapiens	similar to ribonucleic acid binding protein S1; RNA binding protein S1, serine-rich domain
8050443	SMC6	Homo sapiens	structural maintenance of chromosomes 6
7974214	Klhdc1	Homo sapiens	kelch domain containing 1
7895691	GDI2	Homo sapiens	GDP dissociation inhibitor 2
7895694	Jtb	Homo sapiens	jumping translocation breakpoint
7894107	HNRNPCL1, LOC649330,LOC440563	Homo sapiens	heterogeneous nuclear ribonucleoprotein C-like; heterogeneous nuclear ribonucleoprotein C-like 1; similar to Heterogeneous nuclear ribonucleoprotein C-like dJ845O24.4 (hnRNP core protein C-like)
7893518	SMNDC1	Homo sapiens	survival motor neuron domain containing 1
8133062	ZNF273	Homo sapiens	zinc finger protein 273
8102076	CENPE	Homo sapiens	centromere protein E, 312kDa
8125638	Rxrb	Homo sapiens	retinoid X receptor, beta
8001211	ITFG1	Homo sapiens	integrin alpha FG-GAP repeat containing 1
7956211	myl6	Homo sapiens	myosin, light chain 6, alkali, smooth muscle and non-muscle
8052372	MIR217	Homo sapiens	microRNA 217
7961166	KLRC4	Homo sapiens	killer cell lectin-like receptor subfamily C, member 4
8151447	Il7	Homo sapiens	interleukin 7
7892830	Arf1	Homo sapiens	ADP-ribosylation factor 1
8047213	SNORA4	Homo sapiens	small nucleolar RNA, H/ACA box 4
8047215	RNU6-2, RNU6-1	Homo sapiens	RNA, U6 small nuclear 2; RNA, U6 small nuclear 1
7933237	Anubl1	Homo sapiens	AN1, ubiquitin-like, homolog (Xenopus laevis)
8054054	LOC730658, LOC100133939, ANKR36B	Homo sapiens	similar to KIAA1641; similar to ankyrin repeat domain 26; ankyrin repeat domain 36B
7894157	snx3	Homo sapiens	sorting nexin 3
8098743	LOC399839, HPX-2,LOC 728410, LOC653541,LOC653548,LOC653544,LOC653543,LOC653545,LOC440014,LOC440013,LOC441056,LOC728022,DUX4,LOC652119,LOC440017	Homo sapiens	double homeobox, 4-like; similar to double homeobox 4c; similar to double homeobox, 4; double homeobox, 4
8045776	GALNT1,GALNT13	Homo sapiens	UDP-N-acetyl-alpha-D-galactosamine:polypeptide N-acetylgalactosaminyltransferase 13 (GalNAc-T13); UDP-N-acetyl-alpha-D-galactosamine:polypeptide N-acetylgalactosaminyltransferase 1 (GalNAc-T1)
8098723	RN5S10, RN5S11, RN5S12,RN5S13,RN5S14,RN5S15,RN5S16,RN5S6, RN5S7,RN5S8,RN5S9,RN5S2,RN5S3,RN5S4,RN5S5,RN5S1,RN5S17	Homo sapiens	RNA, 5S ribosomal 9; RNA, 5S ribosomal 13; RNA, 5S ribosomal 12; RNA, 5S ribosomal 11; RNA, 5S ribosomal 10; RNA, 5S ribosomal 17; RNA, 5S ribosomal 16; RNA, 5S ribosomal 15; RNA, 5S ribosomal 14; RNA, 5S ribosomal 1; RNA, 5S ribosomal 2; RNA, 5S ribosomal 3; RNA, 5S ribosomal 4; RNA, 5S ribosomal 5; RNA, 5S ribosomal 6; RNA, 5S ribosomal 7; RNA, 5S ribosomal 8
8101013	RCHY1	Homo sapiens	ring finger and CHY zinc finger domain containing 1
7892835	Rps5	Homo sapiens	ribosomal protein S5
8052382	fancl	Homo sapiens	Fanconi anemia, complementation group L
7892837	USP22	Homo sapiens	ubiquitin specific peptidase 22
7961151	KLRC4	Homo sapiens	killer cell lectin-like receptor subfamily C, member 4
7981724	IGHV3-43	Homo sapiens	immunoglobulin heavy variable 3-43
8121392	C6orf182	Homo sapiens	chromosome 6 open reading frame 182
7958216	KIAA1033	Homo sapiens	KIAA1033
7896398	c19orf50	Homo sapiens	chromosome 19 open reading frame 50
7927288	Fam35a	Homo sapiens	family with sequence similarity 35, member A
7896394	ZNF146	Homo sapiens	zinc finger protein 146
7954995	RN5S10, RN5S11, RN5S12,RN5S13,RN5S14,RN5S15,RN5S16,RN5S6, RN5S7,RN5S8,RN5S9,RN5S2,RN5S3,RN5S4,RN5S5,RN5S1,RN5S17	Homo sapiens	RNA, 5S ribosomal 9; RNA, 5S ribosomal 13; RNA, 5S ribosomal 12; RNA, 5S ribosomal 11; RNA, 5S ribosomal 10; RNA, 5S ribosomal 17; RNA, 5S ribosomal 16; RNA, 5S ribosomal 15; RNA, 5S ribosomal 14; RNA, 5S ribosomal 1; RNA, 5S ribosomal 2; RNA, 5S ribosomal 3; RNA, 5S ribosomal 4; RNA, 5S ribosomal 5; RNA, 5S ribosomal 6; RNA, 5S ribosomal 7; RNA, 5S ribosomal 8
7896397	rpl4, RPL4P4,RPL4P5	Homo sapiens	ribosomal protein L4; ribosomal protein L4 pseudogene 5; ribosomal protein L4 pseudogene 4
8000205	LOC100132247,NPIPL3	Homo sapiens	nuclear pore complex interacting protein-like 3; similar to Uncharacterized protein KIAA0220
8085954	AZI2	Homo sapiens	5-azacytidine induced 2
8098732	LOC399839, HPX-2,LOC 728410, LOC653541,LOC653548,LOC653544,LOC653543,LOC653545,LOC440014,LOC440013,LOC441056,LOC728022,DUX4,LOC652119,LOC440017	Homo sapiens	double homeobox, 4-like; similar to double homeobox 4c; similar to double homeobox, 4; double homeobox, 4
8154449	Cntln	Homo sapiens	centlein, centrosomal protein
8101916	RG9MTD2	Homo sapiens	RNA (guanine-9-) methyltransferase domain containing 2
8180269	TATDN1	Homo sapiens	TatD DNase domain containing 1
7993774	RNU6-2, RNU6-1	Homo sapiens	RNA, U6 small nuclear 2; RNA, U6 small nuclear 1
7993774	RNU6-1	Homo sapiens	RNA, U6 small nuclear 2; RNA, U6 small nuclear 1
8098714	frg1	Homo sapiens	FSHD region gene 1
8180284	RPL13, RPL13P12	Homo sapiens	ribosomal protein L13 pseudogene 12; ribosomal protein L13
7947423	RNY4P7, LOC100271832, RNY5P10, RNY1, LOC100132111, RNY4P19, RNY3, RNY4	Homo sapiens	hypothetical LOC100271832; RNA, Ro-associated Y5 pseudogene 10; RNA, Ro-associated Y1; RNA, Ro-associated Y4 pseudogene 7; RNA, Ro-associated Y4 pseudogene 19; RNA, Ro-associated Y3; hypothetical LOC100132111; RNA, Ro-associated Y4
8180285	ZNF257	Homo sapiens	zinc finger protein 257
8107375	Ythdc2	Homo sapiens	YTH domain containing 2
8072139	RNY4P7, LOC100271832, RNY5P10, RNY1, LOC100132111, RNY4P19, RNY3, RNY4	Homo sapiens	hypothetical LOC100271832; RNA, Ro-associated Y5 pseudogene 10; RNA, Ro-associated Y1; RNA, Ro-associated Y4 pseudogene 7; RNA, Ro-associated Y4 pseudogene 19; RNA, Ro-associated Y3; hypothetical LOC100132111; RNA, Ro-associated Y4
7910124	LOC440926, H3F3A,LOC644914,LOC728914,H3F3B	Homo sapiens	H3 histone, family 3B (H3.3B); H3 histone, family 3A pseudogene; H3 histone, family 3A; similar to H3 histone, family 3B; similar to histone H3.3B
8133961	RUNDC3B	Homo sapiens	RUN domain containing 3B
8021824	RNU6-2, RNU6-1	Homo sapiens	RNA, U6 small nuclear 2; RNA, U6 small nuclear 1
8087830	RPL29P11, RPL29P9,RPL29P26,RPL29,RPL29P12	Homo sapiens	ribosomal protein L29 pseudogene 9; ribosomal protein L29 pseudogene 12; ribosomal protein L29 pseudogene 11; ribosomal protein L29; ribosomal protein L29 pseudogene 26
7894136	ATP6V0E1	Homo sapiens	ATPase, H+ transporting, lysosomal 9kDa, V0 subunit e1
7892850	Hnrnpc	Homo sapiens	heterogeneous nuclear ribonucleoprotein C (C1/C2)
7903119	abcd3	Homo sapiens	ATP-binding cassette, sub-family D (ALD), member 3
8180278	Pcdha4	Homo sapiens	protocadherin alpha 1; protocadherin alpha 4
8180278	PCDHA1	Homo sapiens	protocadherin alpha 1; protocadherin alpha 4
8098721	RN5S10, RN5S11, RN5S12,RN5S13,RN5S14,RN5S15,RN5S16,RN5S6, RN5S7,RN5S8,RN5S9,RN5S2,RN5S3,RN5S4,RN5S5,RN5S1,RN5S17	Homo sapiens	RNA, 5S ribosomal 9; RNA, 5S ribosomal 13; RNA, 5S ribosomal 12; RNA, 5S ribosomal 11; RNA, 5S ribosomal 10; RNA, 5S ribosomal 17; RNA, 5S ribosomal 16; RNA, 5S ribosomal 15; RNA, 5S ribosomal 14; RNA, 5S ribosomal 1; RNA, 5S ribosomal 2; RNA, 5S ribosomal 3; RNA, 5S ribosomal 4; RNA, 5S ribosomal 5; RNA, 5S ribosomal 6; RNA, 5S ribosomal 7; RNA, 5S ribosomal 8
8180293	Cdk11b, CDK11A,LOC100133692	Homo sapiens	similar to cell division cycle 2-like 1 (PITSLRE proteins); cell division cycle 2-like 1 (PITSLRE proteins); cell division cycle 2-like 2 (PITSLRE proteins)
8081079	RNY4P7, LOC100271832, RNY5P10, RNY1, LOC100132111, RNY4P19, RNY3, RNY4	Homo sapiens	hypothetical LOC100271832; RNA, Ro-associated Y5 pseudogene 10; RNA, Ro-associated Y1; RNA, Ro-associated Y4 pseudogene 7; RNA, Ro-associated Y4 pseudogene 19; RNA, Ro-associated Y3; hypothetical LOC100132111; RNA, Ro-associated Y4
8123520	C20orf69, LOC729227	Homo sapiens	chromosome 20 open reading frame 69; similar to hCG1984118
8151434	RNU2-2, RNU2-1	Homo sapiens	RNA, U2 small nuclear 1; RNA, U2 small nuclear 2
8117368	Hist1h4c, HIST1H4D,HIST1H4F,HIST1H4H,HIST1H4I,HIST1H4J,HIST2H4A,HIST1H4A,HIST1H4B,HIST2H4B,HIST1H4E,HIST1H4K,HIST1H4L,HIST4H4	Homo sapiens	histone cluster 1, H4l; histone cluster 1, H4k; histone cluster 4, H4; histone cluster 1, H4h; histone cluster 1, H4j; histone cluster 1, H4i; histone cluster 1, H4d; histone cluster 1, H4c; histone cluster 1, H4f; histone cluster 1, H4e; histone cluster 1, H4b; histone cluster 1, H4a; histone cluster 2, H4a; histone cluster 2, H4b
7983189	RNY4P7, LOC100271832, RNY5P10, RNY1, LOC100132111, RNY4P19, RNY3, RNY4	Homo sapiens	hypothetical LOC100271832; RNA, Ro-associated Y5 pseudogene 10; RNA, Ro-associated Y1; RNA, Ro-associated Y4 pseudogene 7; RNA, Ro-associated Y4 pseudogene 19; RNA, Ro-associated Y3; hypothetical LOC100132111; RNA, Ro-associated Y4
8139800	ZNF479,ZNF733	Homo sapiens	zinc finger protein 479; zinc finger protein 733
7916910	LRRC40	Homo sapiens	leucine rich repeat containing 40
8025395	RPS28P6, RPS28, RPS28P9	Homo sapiens	ribosomal protein S28 pseudogene 6; ribosomal protein S28 pseudogene 9; ribosomal protein S28
8126905	CRISP3	Homo sapiens	cysteine-rich secretory protein 3
8101934	Dnajb14	Homo sapiens	DnaJ (Hsp40) homolog, subfamily B, member 14
8180287	RPL31P17, RPL31, RPL31P49	Homo sapiens	ribosomal protein L31 pseudogene 49; ribosomal protein L31 pseudogene 17; ribosomal protein L31
8110518	LOC729569	Homo sapiens	hypothetical protein LOC729569
8045198	cfc1	Homo sapiens	cripto, FRL-1, cryptic family 1
8100808	SULT1E1	Homo sapiens	sulfotransferase family 1E, estrogen-preferring, member 1
7981752	GOLGA8E	Homo sapiens	golgi autoantigen, golgin subfamily a, 8E
7988444	myef2	Homo sapiens	myelin expression factor 2
8053741	C21orf81,ANKRD20A1,ANKRD20A2,ANKRD20A3,LOC642204	Homo sapiens	hCG2042718; chromosome 21 open reading frame 81; ankyrin repeat domain 20 family, member A1; ankyrin repeat domain 20 family, member A3; ankyrin repeat domain 20 family, member A2
8052331	Pnpt1	Homo sapiens	polyribonucleotide nucleotidyltransferase 1
8067903	usp25	Homo sapiens	ubiquitin specific peptidase 25
8071368	TMEM191B, TMEM191C	Homo sapiens	transmembrane protein 191B; transmembrane protein 191C
8104392	RN5S10, RN5S11, RN5S12,RN5S13,RN5S14,RN5S15,RN5S16,RN5S6, RN5S7,RN5S8,RN5S9,RN5S2,RN5S3,RN5S4,RN5S5,RN5S1,RN5S17	Homo sapiens	RNA, 5S ribosomal 9; RNA, 5S ribosomal 13; RNA, 5S ribosomal 12; RNA, 5S ribosomal 11; RNA, 5S ribosomal 10; RNA, 5S ribosomal 17; RNA, 5S ribosomal 16; RNA, 5S ribosomal 15; RNA, 5S ribosomal 14; RNA, 5S ribosomal 1; RNA, 5S ribosomal 2; RNA, 5S ribosomal 3; RNA, 5S ribosomal 4; RNA, 5S ribosomal 5; RNA, 5S ribosomal 6; RNA, 5S ribosomal 7; RNA, 5S ribosomal 8
8137668	RNU6-2, RNU6-1	Homo sapiens	RNA, U6 small nuclear 2; RNA, U6 small nuclear 1
8054414	RGPD6, RGPD5,RGPD8,RGPD4,RGPD3,	Homo sapiens	RANBP2-like and GRIP domain containing 5; RANBP2-like and GRIP domain containing 4; RANBP2-like and GRIP domain containing 3; RANBP2-like and GRIP domain containing 8; RANBP2-like and GRIP domain containing 7; RANBP2-like and GRIP domain containing 6
8091101	RNU6-2, RNU6-1	Homo sapiens	RNA, U6 small nuclear 2; RNA, U6 small nuclear 1
7916969	Zranb2	Homo sapiens	zinc finger, RAN-binding domain containing 2
8053737	ANKRD20B,ANKRD20A4,LOC284232	Homo sapiens	ankyrin repeat domain 20 family, member A2 pseudogene; ankyrin repeat domain 20B; ankyrin repeat domain 20 family, member A4
7954063	RPL13AP25, RPL13AP22,RPL13AP20	Homo sapiens	ribosomal protein L13a pseudogene 20; ribosomal protein L13a pseudogene 22; ribosomal protein L13a pseudogene 25
8161906	GNAQ	Homo sapiens	guanine nucleotide binding protein (G protein), q polypeptide
8084878	RNY4P7, LOC100271832, RNY5P10, RNY1, LOC100132111, RNY4P19, RNY3, RNY4	Homo sapiens	hypothetical LOC100271832; RNA, Ro-associated Y5 pseudogene 10; RNA, Ro-associated Y1; RNA, Ro-associated Y4 pseudogene 7; RNA, Ro-associated Y4 pseudogene 19; RNA, Ro-associated Y3; hypothetical LOC100132111; RNA, Ro-associated Y4
8161904	RNU6-2, RNU6-1	Homo sapiens	RNA, U6 small nuclear 2; RNA, U6 small nuclear 1
7986945	RN7SL1,RN7SL2	Homo sapiens	RNA, 7SL, cytoplasmic 2; RNA, 7SL, cytoplasmic 1
8104621	GUSBP1,GUSBL2	Homo sapiens	glucuronidase, beta-like 2; glucuronidase, beta pseudogene
8085914	Slc4a7	Homo sapiens	solute carrier family 4, sodium bicarbonate cotransporter, member 7
8104627	PMCHL1	Homo sapiens	pro-melanin-concentrating hormone-like 1
8150212	RNU6-2, RNU6-1	Homo sapiens	RNA, U6 small nuclear 2; RNA, U6 small nuclear 1
8138337	Tmem195	Homo sapiens	transmembrane protein 195
8012207	C17orf61	Homo sapiens	chromosome 17 open reading frame 61
8121895	Trmt11	Homo sapiens	tRNA methyltransferase 11 homolog (S. cerevisiae)
8117301	HIST1H2BA	Homo sapiens	histone cluster 1, H2ba
7892808	Atp6v0b	Homo sapiens	ATPase, H+ transporting, lysosomal 21kDa, V0 subunit b
7920873	SNORA42, SNORA80	Homo sapiens	small nucleolar RNA, H/ACA box 80; small nucleolar RNA, H/ACA box 42
8051993	pigf	Homo sapiens	phosphatidylinositol glycan anchor biosynthesis, class F
7970922	RNY4P7, LOC100271832, RNY5P10, RNY1, LOC100132111, RNY4P19, RNY3, RNY4	Homo sapiens	hypothetical LOC100271832; RNA, Ro-associated Y5 pseudogene 10; RNA, Ro-associated Y1; RNA, Ro-associated Y4 pseudogene 7; RNA, Ro-associated Y4 pseudogene 19; RNA, Ro-associated Y3; hypothetical LOC100132111; RNA, Ro-associated Y4
8046281	RNY4P7, LOC100271832, RNY5P10, RNY1, LOC100132111, RNY4P19, RNY3, RNY4	Homo sapiens	hypothetical LOC100271832; RNA, Ro-associated Y5 pseudogene 10; RNA, Ro-associated Y1; RNA, Ro-associated Y4 pseudogene 7; RNA, Ro-associated Y4 pseudogene 19; RNA, Ro-associated Y3; hypothetical LOC100132111; RNA, Ro-associated Y4
8124162	RNU6-2, RNU6-1	Homo sapiens	RNA, U6 small nuclear 2; RNA, U6 small nuclear 1
7902448	RPL17P18, RPL17P39,RPL17P7,RPL17P20,LOC729046,RPL17P33,RPL17P34,RPL17P9,RPL17P22,RPL17,RPL17P36	Homo sapiens	ribosomal protein L17 pseudogene 22; ribosomal protein L17 pseudogene 36; ribosomal protein L17 pseudogene 20; similar to ribosomal protein L17; ribosomal protein L17 pseudogene 33; ribosomal protein L17 pseudogene 34; ribosomal protein L17 pseudogene 9; ribosomal protein L17; ribosomal protein L17 pseudogene 18; ribosomal protein L17 pseudogene 7; ribosomal protein L17 pseudogene 39
8007643	C17orf104	Homo sapiens	hypothetical protein FLJ35848
7894171	2014-09-02	Homo sapiens	septin 2
7933672	PCDH15	Homo sapiens	protocadherin 15
8045142	Fam128b	Homo sapiens	family with sequence similarity 128, member B
8042373	etaa1	Homo sapiens	Ewing tumor-associated antigen 1
8081055	Chmp2b	Homo sapiens	chromatin modifying protein 2B
8021147	ier3ip1	Pan troglodytes	immediate early response 3 interacting protein 1
7961182	KLRC2	Homo sapiens	killer cell lectin-like receptor subfamily C, member 2
7902441	ST6GALNAC5	Homo sapiens	ST6 (alpha-N-acetyl-neuraminyl-2,3-beta-galactosyl-1,3)-N-acetylgalactosaminide alpha-2,6-sialyltransferase 5
7981728	IGHV3-11, IGHV3-7,IGHG3,IGHG1,IGHM,IGHV4-31	Homo sapiens	immunoglobulin heavy constant gamma 1 (G1m marker); immunoglobulin heavy constant mu; immunoglobulin heavy variable 3-7; immunoglobulin heavy constant gamma 3 (G3m marker); immunoglobulin heavy variable 3-11 (gene/pseudogene); immunoglobulin heavy variable 4-31; immunoglobulin heavy locus
7892817	RPL18	Homo sapiens	ribosomal protein L18
7961173	KLRK1	Homo sapiens	killer cell lectin-like receptor subfamily K, member 1
8081036	CADM2	Homo sapiens	cell adhesion molecule 2
8081034	RNU2-2, RNU2-1	Homo sapiens	RNA, U2 small nuclear 1; RNA, U2 small nuclear 2
7951195	ANGPTL5	Homo sapiens	angiopoietin-like 5
8047767	RNY4P7, LOC100271832, RNY5P10, RNY1, LOC100132111, RNY4P19, RNY3, RNY4	Homo sapiens	hypothetical LOC100271832; RNA, Ro-associated Y5 pseudogene 10; RNA, Ro-associated Y1; RNA, Ro-associated Y4 pseudogene 7; RNA, Ro-associated Y4 pseudogene 19; RNA, Ro-associated Y3; hypothetical LOC100132111; RNA, Ro-associated Y4
8055085	RNY4P7, LOC100271832, RNY5P10, RNY1, LOC100132111, RNY4P19, RNY3, RNY4	Homo sapiens	hypothetical LOC100271832; RNA, Ro-associated Y5 pseudogene 10; RNA, Ro-associated Y1; RNA, Ro-associated Y4 pseudogene 7; RNA, Ro-associated Y4 pseudogene 19; RNA, Ro-associated Y3; hypothetical LOC100132111; RNA, Ro-associated Y4
7894185	oaz1	Homo sapiens	ornithine decarboxylase antizyme 1
8120466	RNY4P7, LOC100271832, RNY5P10, RNY1, LOC100132111, RNY4P19, RNY3, RNY4	Homo sapiens	hypothetical LOC100271832; RNA, Ro-associated Y5 pseudogene 10; RNA, Ro-associated Y1; RNA, Ro-associated Y4 pseudogene 7; RNA, Ro-associated Y4 pseudogene 19; RNA, Ro-associated Y3; hypothetical LOC100132111; RNA, Ro-associated Y4
8138310	DGKB	Homo sapiens	diacylglycerol kinase, beta 90kDa
8120464	RNU6-2, RNU6-1	Homo sapiens	RNA, U6 small nuclear 2; RNA, U6 small nuclear 1
7927267	Fam35a	Homo sapiens	family with sequence similarity 35, member A
7892820	RPL9P7	Homo sapiens	ribosomal protein L9 pseudogene 7
7896339	RPL10AP9, RPL10A,RPL10AP6	Homo sapiens	ribosomal protein L10a pseudogene 6; ribosomal protein L10a; ribosomal protein L10a pseudogene 9
7896337	NBEAL1	Homo sapiens	neurobeachin-like 1
8173928	RNY4P7, LOC100271832, RNY5P10, RNY1, LOC100132111, RNY4P19, RNY3, RNY4	Homo sapiens	hypothetical LOC100271832; RNA, Ro-associated Y5 pseudogene 10; RNA, Ro-associated Y1; RNA, Ro-associated Y4 pseudogene 7; RNA, Ro-associated Y4 pseudogene 19; RNA, Ro-associated Y3; hypothetical LOC100132111; RNA, Ro-associated Y4
8095484	C4orf35	Homo sapiens	chromosome 4 open reading frame 35
8095477	CSN3	Homo sapiens	casein kappa
8103206	FBXW7	Homo sapiens	F-box and WD repeat domain containing 7
7895299	CFL1	Homo sapiens	cofilin 1 (non-muscle)
7895298	TARDBP	Homo sapiens	TAR DNA binding protein
8130003	SF3B5	Homo sapiens	splicing factor 3b, subunit 5, 10kDa
8127698	PHIP	Homo sapiens	pleckstrin homology domain interacting protein
7901883	ANGPTL3	Homo sapiens	angiopoietin-like 3
7995825	MT1F	Homo sapiens	metallothionein 1F
7896349	RPL18	Homo sapiens	ribosomal protein L18
7896345	LOC644063,HNRNPK	Homo sapiens	heterogeneous nuclear ribonucleoprotein K; similar to heterogeneous nuclear ribonucleoprotein K
8160151	ZDHHC21	Homo sapiens	zinc finger, DHHC-type containing 21
8129311	RNU4-2, RNU4-1,RNU4-1B	Homo sapiens	RNA, U4 small nuclear 2; RNA, U4 small nuclear 1; RNA, U4 small nuclear 1B
7901852	RNU6-2, RNU6-1	Homo sapiens	RNA, U6 small nuclear 2; RNA, U6 small nuclear 1
8173941	Tspan6	Homo sapiens	tetraspanin 6
8142452	TFEC	Homo sapiens	transcription factor EC
8142450	RNY4P7, LOC100271832, RNY5P10, RNY1, LOC100132111, RNY4P19, RNY3, RNY4	Homo sapiens	hypothetical LOC100271832; RNA, Ro-associated Y5 pseudogene 10; RNA, Ro-associated Y1; RNA, Ro-associated Y4 pseudogene 7; RNA, Ro-associated Y4 pseudogene 19; RNA, Ro-associated Y3; hypothetical LOC100132111; RNA, Ro-associated Y4
7895271	GDI2	Homo sapiens	GDP dissociation inhibitor 2
8100227	RNU6-2, RNU6-1	Homo sapiens	RNA, U6 small nuclear 2; RNA, U6 small nuclear 1
8097335	Hspa4l	Homo sapiens	heat shock 70kDa protein 4-like
7895273	Rpl34	Homo sapiens	ribosomal protein L34
7895275	RPL6P27,rpl6, RPL6P19,RPL6P10	Homo sapiens	ribosomal protein L6 pseudogene 27; ribosomal protein L6 pseudogene 19; ribosomal protein L6; ribosomal protein L6 pseudogene 10
7895276	Canx	Homo sapiens	calnexin
7969792	rn7sk	Homo sapiens	RNA, 7SK small nuclear
8128284	EPHA7	Homo sapiens	EPH receptor A7
8122600	STXBP5	Homo sapiens	syntaxin binding protein 5 (tomosyn)
8056518	SCN7A	Homo sapiens	sodium channel, voltage-gated, type VII, alpha
7947248	kif18a	Homo sapiens	kinesin family member 18A
8044161	RGPD6, RGPD5,RGPD8,RGPD4,RGPD3,	Homo sapiens	RANBP2-like and GRIP domain containing 5; RANBP2-like and GRIP domain containing 4; RANBP2-like and GRIP domain containing 3; RANBP2-like and GRIP domain containing 8; RANBP2-like and GRIP domain containing 7; RANBP2-like and GRIP domain containing 6
8129330	TRDN	Homo sapiens	triadin
8140239	LOC100132832, PMS2L5,PMS2L2,LOC730323	Homo sapiens	postmeiotic segregation increased 2-like 5; postmeiotic segregation increased 2-like 5-like; similar to postmeiotic segregation increased 2-like 2; postmeiotic segregation increased 2-like 2 pseudogene
7936966	RNU2-2, RNU2-1	Homo sapiens	RNA, U2 small nuclear 1; RNA, U2 small nuclear 2
7979696	RNY4P7, LOC100271832, RNY5P10, RNY1, LOC100132111, RNY4P19, RNY3, RNY4	Homo sapiens	hypothetical LOC100271832; RNA, Ro-associated Y5 pseudogene 10; RNA, Ro-associated Y1; RNA, Ro-associated Y4 pseudogene 7; RNA, Ro-associated Y4 pseudogene 19; RNA, Ro-associated Y3; hypothetical LOC100132111; RNA, Ro-associated Y4
8009561	RPL38	Homo sapiens	ribosomal protein L38
8099581	LCORL	Homo sapiens	ligand dependent nuclear receptor corepressor-like
8067825	C21orf99	Homo sapiens	chromosome 21 open reading frame 99
8150157	RNU6-2, RNU6-1	Homo sapiens	RNA, U6 small nuclear 2; RNA, U6 small nuclear 1
8150151	RN5S10, RN5S11, RN5S12,RN5S13,RN5S14,RN5S15,RN5S16,RN5S6, RN5S7,RN5S8,RN5S9,RN5S2,RN5S3,RN5S4,RN5S5,RN5S1,RN5S17	Homo sapiens	RNA, 5S ribosomal 9; RNA, 5S ribosomal 13; RNA, 5S ribosomal 12; RNA, 5S ribosomal 11; RNA, 5S ribosomal 10; RNA, 5S ribosomal 17; RNA, 5S ribosomal 16; RNA, 5S ribosomal 15; RNA, 5S ribosomal 14; RNA, 5S ribosomal 1; RNA, 5S ribosomal 2; RNA, 5S ribosomal 3; RNA, 5S ribosomal 4; RNA, 5S ribosomal 5; RNA, 5S ribosomal 6; RNA, 5S ribosomal 7; RNA, 5S ribosomal 8
7896375	Arf1	Homo sapiens	ADP-ribosylation factor 1
7997940	SNORD68	Homo sapiens	small nucleolar RNA, C/D box 68
8095441	CSN1S2A	Homo sapiens	casein alpha s2-like A
8054771	SLC35F5	Homo sapiens	solute carrier family 35, member F5
7893814	2014-09-02	Homo sapiens	septin 2
7893821	ANAPC5	Homo sapiens	anaphase promoting complex subunit 5
8095435	HTN1	Homo sapiens	histatin 1
7893012	TARDBP	Homo sapiens	TAR DNA binding protein
7967698	RNU6-2, RNU6-1	Homo sapiens	RNA, U6 small nuclear 2; RNA, U6 small nuclear 1
8023710	Cdh19	Homo sapiens	cadherin 19, type 2
8092295	CCDC39	Homo sapiens	coiled-coil domain containing 39
8131614	ahr	Homo sapiens	aryl hydrocarbon receptor
7896384	HNRNPA1L2	Homo sapiens	heterogeneous nuclear ribonucleoprotein A1-like 2
8063447	RNY4P7, LOC100271832, RNY5P10, RNY1, LOC100132111, RNY4P19, RNY3, RNY4	Homo sapiens	hypothetical LOC100271832; RNA, Ro-associated Y5 pseudogene 10; RNA, Ro-associated Y1; RNA, Ro-associated Y4 pseudogene 7; RNA, Ro-associated Y4 pseudogene 19; RNA, Ro-associated Y3; hypothetical LOC100132111; RNA, Ro-associated Y4
8156132	RNY4P7, LOC100271832, RNY5P10, RNY1, LOC100132111, RNY4P19, RNY3, RNY4	Homo sapiens	hypothetical LOC100271832; RNA, Ro-associated Y5 pseudogene 10; RNA, Ro-associated Y1; RNA, Ro-associated Y4 pseudogene 7; RNA, Ro-associated Y4 pseudogene 19; RNA, Ro-associated Y3; hypothetical LOC100132111; RNA, Ro-associated Y4
8055402	RNU6-2	Homo sapiens	RNA, U6 small nuclear 2; RNA, U6 small nuclear 1
8055402	RNU6-1	Homo sapiens	RNA, U6 small nuclear 2; RNA, U6 small nuclear 1
7893827	HINT1	Homo sapiens	histidine triad nucleotide binding protein 1
8126939	DEFB110	Homo sapiens	defensin, beta 111; defensin, beta 110
7928551	RPS24	Homo sapiens	ribosomal protein S24
7893005	SMNDC1	Homo sapiens	survival motor neuron domain containing 1
8113431	RN5S10, RN5S11, RN5S12,RN5S13,RN5S14,RN5S15,RN5S16,RN5S6, RN5S7,RN5S8,RN5S9,RN5S2,RN5S3,RN5S4,RN5S5,RN5S1,RN5S17	Homo sapiens	RNA, 5S ribosomal 9; RNA, 5S ribosomal 13; RNA, 5S ribosomal 12; RNA, 5S ribosomal 11; RNA, 5S ribosomal 10; RNA, 5S ribosomal 17; RNA, 5S ribosomal 16; RNA, 5S ribosomal 15; RNA, 5S ribosomal 14; RNA, 5S ribosomal 1; RNA, 5S ribosomal 2; RNA, 5S ribosomal 3; RNA, 5S ribosomal 4; RNA, 5S ribosomal 5; RNA, 5S ribosomal 6; RNA, 5S ribosomal 7; RNA, 5S ribosomal 8
7893002	BAT1	Homo sapiens	HLA-B associated transcript 1
8059393	cul3	Homo sapiens	cullin 3
7895247	HNRNPD	Homo sapiens	heterogeneous nuclear ribonucleoprotein D (AU-rich element RNA binding protein 1, 37kDa)
8046824	FSIP2	Homo sapiens	fibrous sheath interacting protein 2
7895248	EIF4G2	Homo sapiens	eukaryotic translation initiation factor 4 gamma, 2
8103238	RNY4P7, LOC100271832, RNY5P10, RNY1, LOC100132111, RNY4P19, RNY3, RNY4	Homo sapiens	hypothetical LOC100271832; RNA, Ro-associated Y5 pseudogene 10; RNA, Ro-associated Y1; RNA, Ro-associated Y4 pseudogene 7; RNA, Ro-associated Y4 pseudogene 19; RNA, Ro-associated Y3; hypothetical LOC100132111; RNA, Ro-associated Y4
7896352	YY1	Homo sapiens	YY1 transcription factor
8140211	SPDYE3	Homo sapiens	speedy homolog E3 (Xenopus laevis)
7930870	Tomm22	Homo sapiens	translocase of outer mitochondrial membrane 22 homolog (yeast)
8102560	Mad2l1	Homo sapiens	MAD2 mitotic arrest deficient-like 1 (yeast)
8067864	C21orf126, ANKRD20A5	Homo sapiens	chromosome 21 open reading frame 126; ankyrin repeat domain 20 family, member A5
8130038	SHPRH	Homo sapiens	SNF2 histone linker PHD RING helicase
7903188	ptbp2	Homo sapiens	polypyrimidine tract binding protein 2
7993606	RNU6-2, RNU6-1	Homo sapiens	RNA, U6 small nuclear 2; RNA, U6 small nuclear 1
8112376	CENPK	Homo sapiens	centromere protein K
8044961	RNU4ATAC	Homo sapiens	RNA, U4atac small nuclear (U12-dependent splicing)
7984014	RN5S10, RN5S11, RN5S12,RN5S13,RN5S14,RN5S15,RN5S16,RN5S6, RN5S7,RN5S8,RN5S9,RN5S2,RN5S3,RN5S4,RN5S5,RN5S1,RN5S17	Homo sapiens	RNA, 5S ribosomal 9; RNA, 5S ribosomal 13; RNA, 5S ribosomal 12; RNA, 5S ribosomal 11; RNA, 5S ribosomal 10; RNA, 5S ribosomal 17; RNA, 5S ribosomal 16; RNA, 5S ribosomal 15; RNA, 5S ribosomal 14; RNA, 5S ribosomal 1; RNA, 5S ribosomal 2; RNA, 5S ribosomal 3; RNA, 5S ribosomal 4; RNA, 5S ribosomal 5; RNA, 5S ribosomal 6; RNA, 5S ribosomal 7; RNA, 5S ribosomal 8
7964745	Tmbim4	Homo sapiens	transmembrane BAX inhibitor motif containing 4
8022498	MIR133A1	Homo sapiens	microRNA 133a-1
8126934	DEFB114	Homo sapiens	defensin, beta 114
8113427	RN7SL1, RN7SL2	Homo sapiens	RNA, 7SL, cytoplasmic 2; RNA, 7SL, cytoplasmic 1
7928937	MINPP1	Homo sapiens	multiple inositol polyphosphate histidine phosphatase, 1
7903183	EEF1A1P11	Homo sapiens	eukaryotic translation elongation factor 1 alpha-like 9 pseudogene
7915284	RNY4P7, LOC100271832, RNY5P10, RNY1, LOC100132111, RNY4P19, RNY3, RNY4	Homo sapiens	hypothetical LOC100271832; RNA, Ro-associated Y5 pseudogene 10; RNA, Ro-associated Y1; RNA, Ro-associated Y4 pseudogene 7; RNA, Ro-associated Y4 pseudogene 19; RNA, Ro-associated Y3; hypothetical LOC100132111; RNA, Ro-associated Y4
8142480	ASZ1	Homo sapiens	ankyrin repeat, SAM and basic leucine zipper domain containing 1
8162019	KIF27	Homo sapiens	kinesin family member 27
8149245	DEFB109P1B, DEFB109P1	Homo sapiens	defensin, beta 109, pseudogene 1; defensin, beta 109, pseudogene 1B
7896369	RpL30	Homo sapiens	ribosomal protein L30
8168884	RNU6-2, RNU6-1	Homo sapiens	RNA, U6 small nuclear 2; RNA, U6 small nuclear 1
7993622	Itpripl2	Homo sapiens	inositol 1,4,5-triphosphate receptor interacting protein-like 2
7895221	KARS	Homo sapiens	lysyl-tRNA synthetase
8091190	LOC648152, LOC651921,ATR	Homo sapiens	ataxia telangiectasia and Rad3 related; similar to ataxia telangiectasia and Rad3 related protein
7962384	ADAMTS20	Homo sapiens	ADAM metallopeptidase with thrombospondin type 1 motif, 20
8003859	RNY4P7, LOC100271832, RNY5P10, RNY1, LOC100132111, RNY4P19, RNY3, RNY4	Homo sapiens	hypothetical LOC100271832; RNA, Ro-associated Y5 pseudogene 10; RNA, Ro-associated Y1; RNA, Ro-associated Y4 pseudogene 7; RNA, Ro-associated Y4 pseudogene 19; RNA, Ro-associated Y3; hypothetical LOC100132111; RNA, Ro-associated Y4
8082745	CCRL1	Homo sapiens	chemokine (C-C motif) receptor-like 1
8113483	TMEM232	Homo sapiens	hypothetical protein LOC642987
7895214	HNRNPD	Homo sapiens	heterogeneous nuclear ribonucleoprotein D (AU-rich element RNA binding protein 1, 37kDa)
8059341	RN7SL1, RN7SL2	Homo sapiens	RNA, 7SL, cytoplasmic 2; RNA, 7SL, cytoplasmic 1
7893058	HINT1	Homo sapiens	histidine triad nucleotide binding protein 1
8113489	SNORA51	Homo sapiens	small nucleolar RNA, H/ACA box 51
8106784	Rasa1	Homo sapiens	RAS p21 protein activator (GTPase activating protein) 1
7917996	LRRC39	Homo sapiens	leucine rich repeat containing 39
8095009	dcun1d4	Homo sapiens	DCN1, defective in cullin neddylation 1, domain containing 4 (S. cerevisiae)
7978822	RNU6-2, RNU6-1	Homo sapiens	RNA, U6 small nuclear 2; RNA, U6 small nuclear 1
7986763	RNU6-2, RNU6-1	Homo sapiens	RNA, U6 small nuclear 2; RNA, U6 small nuclear 1
8098439	epcam	Homo sapiens	epithelial cell adhesion molecule
8095404	UGT2B28	Homo sapiens	UDP glucuronosyltransferase 2 family, polypeptide B28
7952325	HSPA8	Homo sapiens	heat shock 70kDa protein 8
7918294	C1orf194	Homo sapiens	chromosome 1 open reading frame 194
7905530	Smcp	Homo sapiens	sperm mitochondria-associated cysteine-rich protein
7971361	NUFIP1	Homo sapiens	nuclear fragile X mental retardation protein interacting protein 1
8002760	LOC100132346	Homo sapiens	similar to heat shock 10 kDa protein 1
7894579	PARK7	Homo sapiens	Parkinson disease (autosomal recessive, early onset) 7
8056966	rplp1	Homo sapiens	ribosomal protein, large, P1
8030368	rps11, RPS11P5	Homo sapiens	ribosomal protein S11 pseudogene 5; ribosomal protein S11
8113050	CETN3	Homo sapiens	centrin, EF-hand protein, 3 (CDC31 homolog, yeast)
7909494	SYT14	Homo sapiens	synaptotagmin XIV
7893458	ilf2	Homo sapiens	interleukin enhancer binding factor 2, 45kDa
7952313	MIRLET7A2	Homo sapiens	microRNA let-7a-2
7908492	CFHR4	Homo sapiens	complement factor H-related 4
8155554	aqp7	Homo sapiens	aquaporin 7
8095412	Csn1s1	Homo sapiens	casein alpha s1
8036737	RPS16P10, RPS16P1,RPS16	Homo sapiens	ribosomal protein S16 pseudogene 1; ribosomal protein S16 pseudogene 10; ribosomal protein S16
7908496	CFHR2	Homo sapiens	complement factor H-related 2
7965064	OSBPL8	Homo sapiens	oxysterol binding protein-like 8
8003230	LOC732275	Homo sapiens	similar to hCG1645603
7908499	CFHR5	Homo sapiens	complement factor H-related 5
8106763	RNU4-2, RNU4-1,RNU4-1B	Homo sapiens	RNA, U4 small nuclear 2; RNA, U4 small nuclear 1; RNA, U4 small nuclear 1B
8112337	SFRS12IP1	Homo sapiens	SFRS12-interacting protein 1; family with sequence similarity 159, member B
8112337	FAM159B	Homo sapiens	SFRS12-interacting protein 1; family with sequence similarity 159, member B
7961844	CASC1	Homo sapiens	cancer susceptibility candidate 1
8102523	FABP2	Homo sapiens	fatty acid binding protein 2, intestinal
7978801	MDGA2	Homo sapiens	MAM domain containing glycosylphosphatidylinositol anchor 2
7893460	HNRNPCL1, LOC649330,LOC440563	Homo sapiens	heterogeneous nuclear ribonucleoprotein C-like; heterogeneous nuclear ribonucleoprotein C-like 1; similar to Heterogeneous nuclear ribonucleoprotein C-like dJ845O24.4 (hnRNP core protein C-like)
8113083	fam172a	Homo sapiens	family with sequence similarity 172, member A
7917180	RN5S10, RN5S11, RN5S12,RN5S13,RN5S14,RN5S15,RN5S16,RN5S6, RN5S7,RN5S8,RN5S9,RN5S2,RN5S3,RN5S4,RN5S5,RN5S1,RN5S17	Homo sapiens	RNA, 5S ribosomal 9; RNA, 5S ribosomal 13; RNA, 5S ribosomal 12; RNA, 5S ribosomal 11; RNA, 5S ribosomal 10; RNA, 5S ribosomal 17; RNA, 5S ribosomal 16; RNA, 5S ribosomal 15; RNA, 5S ribosomal 14; RNA, 5S ribosomal 1; RNA, 5S ribosomal 2; RNA, 5S ribosomal 3; RNA, 5S ribosomal 4; RNA, 5S ribosomal 5; RNA, 5S ribosomal 6; RNA, 5S ribosomal 7; RNA, 5S ribosomal 8
7917182	ELTD1	Homo sapiens	EGF, latrophilin and seven transmembrane domain containing 1
8081452	RNY4P7, LOC100271832, RNY5P10, RNY1, LOC100132111, RNY4P19, RNY3, RNY4	Homo sapiens	hypothetical LOC100271832; RNA, Ro-associated Y5 pseudogene 10; RNA, Ro-associated Y1; RNA, Ro-associated Y4 pseudogene 7; RNA, Ro-associated Y4 pseudogene 19; RNA, Ro-associated Y3; hypothetical LOC100132111; RNA, Ro-associated Y4
7968270	ATP5E	Homo sapiens	ATP synthase, H+ transporting, mitochondrial F1 complex, epsilon subunit pseudogene 2; ATP synthase, H+ transporting, mitochondrial F1 complex, epsilon subunit
7968270	ATP5EP2	Homo sapiens	ATP synthase, H+ transporting, mitochondrial F1 complex, epsilon subunit pseudogene 2; ATP synthase, H+ transporting, mitochondrial F1 complex, epsilon subunit
7908481	CFHR3	Homo sapiens	complement factor H-related 3
7893061	psmb2	Homo sapiens	proteasome (prosome, macropain) subunit, beta type, 2
7894594	SNORA72	Homo sapiens	small nucleolar RNA, H/ACA box 72
8095422	STATH	Homo sapiens	statherin
7894596	oaz1	Homo sapiens	ornithine decarboxylase antizyme 1
7908488	Cfhr1	Homo sapiens	complement factor H-related 1
7893853	c1orf183	Homo sapiens	chromosome 1 open reading frame 183
8006845	RPL19P12	Homo sapiens	ribosomal protein L19; ribosomal protein L19 pseudogene 12
8006845	rpl19	Homo sapiens	ribosomal protein L19; ribosomal protein L19 pseudogene 12
8030351	RPL13AP7	Homo sapiens	ribosomal protein L13a pseudogene 7; ribosomal protein L13a pseudogene 5; ribosomal protein L13a pseudogene 16; ribosomal protein L13a; ribosomal protein L13a pseudogene 18
8030351	RPL13AP18	Homo sapiens	ribosomal protein L13a pseudogene 7; ribosomal protein L13a pseudogene 5; ribosomal protein L13a pseudogene 16; ribosomal protein L13a; ribosomal protein L13a pseudogene 18
8030351	Rpl13a	Homo sapiens	ribosomal protein L13a pseudogene 7; ribosomal protein L13a pseudogene 5; ribosomal protein L13a pseudogene 16; ribosomal protein L13a; ribosomal protein L13a pseudogene 18
8030351	RPL13AP16	Homo sapiens	ribosomal protein L13a pseudogene 7; ribosomal protein L13a pseudogene 5; ribosomal protein L13a pseudogene 16; ribosomal protein L13a; ribosomal protein L13a pseudogene 18
8030351	RPL13AP5	Homo sapiens	ribosomal protein L13a pseudogene 7; ribosomal protein L13a pseudogene 5; ribosomal protein L13a pseudogene 16; ribosomal protein L13a; ribosomal protein L13a pseudogene 18
8155946	VPS13A	Homo sapiens	vacuolar protein sorting 13 homolog A (S. cerevisiae)
7965787	RNU6-2	Homo sapiens	RNA, U6 small nuclear 2; RNA, U6 small nuclear 1
7965787	RNU6-1	Homo sapiens	RNA, U6 small nuclear 2; RNA, U6 small nuclear 1
8095430	HTN3	Homo sapiens	histatin 3
7894549	C2orf24	Homo sapiens	chromosome 2 open reading frame 24
7962349	GXYLT1	Homo sapiens	glycosyltransferase 8 domain containing 3
8043456	IGKV2D-18	Homo sapiens	immunoglobulin kappa variable 2D-18 pseudogene
7894542	capns1	Homo sapiens	calpain, small subunit 1
7962341	SNORA22	Homo sapiens	small nucleolar RNA, H/ACA box 22
8155530	KGFLP1	Homo sapiens	keratinocyte growth factor-like protein 1
7962343	RNU6-2	Homo sapiens	RNA, U6 small nuclear 2; RNA, U6 small nuclear 1
7962343	RNU6-1	Homo sapiens	RNA, U6 small nuclear 2; RNA, U6 small nuclear 1
7893090	rpl9	Homo sapiens	ribosomal protein L9; ribosomal protein L9 pseudogene 25
7893090	RPL9P25	Homo sapiens	ribosomal protein L9; ribosomal protein L9 pseudogene 25
7893091	WDR38	Pan troglodytes	WD repeat domain 38
8116313	LOC729569	Homo sapiens	hypothetical protein LOC729569
8074878	RN7SL1	Homo sapiens	RNA, 7SL, cytoplasmic 2; RNA, 7SL, cytoplasmic 1
8074878	RN7SL2	Homo sapiens	RNA, 7SL, cytoplasmic 2; RNA, 7SL, cytoplasmic 1
7959164	dynll1	Homo sapiens	dynein, light chain, LC8-type 1
7893485	SNRNP200	Homo sapiens	similar to U5 snRNP-specific protein, 200 kDa; small nuclear ribonucleoprotein 200kDa (U5)
7893485	LOC652147	Homo sapiens	similar to U5 snRNP-specific protein, 200 kDa; small nuclear ribonucleoprotein 200kDa (U5)
8056943	KIAA1715	Homo sapiens	KIAA1715
8135405	GPR22	Homo sapiens	G protein-coupled receptor 22
8055496	Lrp1b	Homo sapiens	low density lipoprotein-related protein 1B (deleted in tumors)
8100688	TMPRSS11F	Homo sapiens	transmembrane protease, serine 11F
7975989	C14orf156	Homo sapiens	chromosome 14 open reading frame 156
8162086	AGTPBP1	Homo sapiens	ATP/GTP binding protein 1
7967620	DHX37	Homo sapiens	DEAH (Asp-Glu-Ala-His) box polypeptide 37
7965359	ATP2B1	Homo sapiens	ATPase, Ca++ transporting, plasma membrane 1
7896302	c19orf50	Homo sapiens	chromosome 19 open reading frame 50
8118564	LOC100133678	Homo sapiens	similar to hCG2042724; similar to HLA class II histocompatibility antigen, DQ(1) alpha chain precursor (DC-4 alpha chain); major histocompatibility complex, class II, DQ alpha 1
8118564	hla-dqa1	Homo sapiens	similar to hCG2042724; similar to HLA class II histocompatibility antigen, DQ(1) alpha chain precursor (DC-4 alpha chain); major histocompatibility complex, class II, DQ alpha 1
7959153	Cox6a1	Homo sapiens	cytochrome c oxidase subunit VIa polypeptide 1
7896308	Canx	Homo sapiens	calnexin
8140668	SEMA3A	Homo sapiens	sema domain, immunoglobulin domain (Ig), short basic domain, secreted, (semaphorin) 3A
7917199	ttll7	Homo sapiens	tubulin tyrosine ligase-like family, member 7
8140686	Sema3d	Homo sapiens	sema domain, immunoglobulin domain (Ig), short basic domain, secreted, (semaphorin) 3D
7893886	Myst2	Homo sapiens	MYST histone acetyltransferase 2; similar to MYST histone acetyltransferase 2
7893886	LOC648927	Homo sapiens	MYST histone acetyltransferase 2; similar to MYST histone acetyltransferase 2
8148124	MTBP	Homo sapiens	Mdm2, transformed 3T3 cell double minute 2, p53 binding protein (mouse) binding protein, 104kDa
7971375	TPT1	Homo sapiens	similar to tumor protein, translationally-controlled 1; tumor protein, translationally-controlled 1
7971375	LOC389787	Homo sapiens	similar to tumor protein, translationally-controlled 1; tumor protein, translationally-controlled 1
7971375	LOC285741	Homo sapiens	similar to tumor protein, translationally-controlled 1; tumor protein, translationally-controlled 1
7908459	CFH	Homo sapiens	complement factor H
7893880	Canx	Homo sapiens	calnexin
7894561	eif3d	Homo sapiens	eukaryotic translation initiation factor 3, subunit D
8092239	SNORA25	Homo sapiens	TATA box binding protein (TBP)-associated factor, RNA polymerase I, D, 41kDa; small nucleolar RNA, H/ACA box 32; small nucleolar RNA, H/ACA box 25
8092239	TAF1D	Homo sapiens	TATA box binding protein (TBP)-associated factor, RNA polymerase I, D, 41kDa; small nucleolar RNA, H/ACA box 32; small nucleolar RNA, H/ACA box 25
8092239	SNORA32	Homo sapiens	TATA box binding protein (TBP)-associated factor, RNA polymerase I, D, 41kDa; small nucleolar RNA, H/ACA box 32; small nucleolar RNA, H/ACA box 25
8043020	RN7SL1	Homo sapiens	RNA, 7SL, cytoplasmic 2; RNA, 7SL, cytoplasmic 1
8043020	RN7SL2	Homo sapiens	RNA, 7SL, cytoplasmic 2; RNA, 7SL, cytoplasmic 1
7994339	RNU6-2	Homo sapiens	RNA, U6 small nuclear 2; RNA, U6 small nuclear 1
7994339	RNU6-1	Homo sapiens	RNA, U6 small nuclear 2; RNA, U6 small nuclear 1
7917974	RNU6-2	Homo sapiens	RNA, U6 small nuclear 2; RNA, U6 small nuclear 1
7917974	RNU6-1	Homo sapiens	RNA, U6 small nuclear 2; RNA, U6 small nuclear 1
7894555	Prpf8	Homo sapiens	PRP8 pre-mRNA processing factor 8 homolog (S. cerevisiae)
8027345	ZNF849P	Homo sapiens	zinc finger protein 98 (F7175); keratin associated protein 1-1; zinc finger protein 492; zinc finger protein 849 pseudogene
8027345	KRTAP1-1	Homo sapiens	zinc finger protein 98 (F7175); keratin associated protein 1-1; zinc finger protein 492; zinc finger protein 849 pseudogene
8027345	ZNF492	Homo sapiens	zinc finger protein 98 (F7175); keratin associated protein 1-1; zinc finger protein 492; zinc finger protein 849 pseudogene
8027345	ZNF98	Homo sapiens	zinc finger protein 98 (F7175); keratin associated protein 1-1; zinc finger protein 492; zinc finger protein 849 pseudogene
7957404	C12orf26	Homo sapiens	chromosome 12 open reading frame 26
8128245	RNY4P7	Homo sapiens	hypothetical LOC100271832; RNA, Ro-associated Y5 pseudogene 10; RNA, Ro-associated Y1; RNA, Ro-associated Y4 pseudogene 7; RNA, Ro-associated Y4 pseudogene 19; RNA, Ro-associated Y3; hypothetical LOC100132111; RNA, Ro-associated Y4
8128245	LOC100271832	Homo sapiens	hypothetical LOC100271832; RNA, Ro-associated Y5 pseudogene 10; RNA, Ro-associated Y1; RNA, Ro-associated Y4 pseudogene 7; RNA, Ro-associated Y4 pseudogene 19; RNA, Ro-associated Y3; hypothetical LOC100132111; RNA, Ro-associated Y4
8128245	RNY5P10	Homo sapiens	hypothetical LOC100271832; RNA, Ro-associated Y5 pseudogene 10; RNA, Ro-associated Y1; RNA, Ro-associated Y4 pseudogene 7; RNA, Ro-associated Y4 pseudogene 19; RNA, Ro-associated Y3; hypothetical LOC100132111; RNA, Ro-associated Y4
8128245	RNY1	Homo sapiens	hypothetical LOC100271832; RNA, Ro-associated Y5 pseudogene 10; RNA, Ro-associated Y1; RNA, Ro-associated Y4 pseudogene 7; RNA, Ro-associated Y4 pseudogene 19; RNA, Ro-associated Y3; hypothetical LOC100132111; RNA, Ro-associated Y4
8128245	LOC100132111	Homo sapiens	hypothetical LOC100271832; RNA, Ro-associated Y5 pseudogene 10; RNA, Ro-associated Y1; RNA, Ro-associated Y4 pseudogene 7; RNA, Ro-associated Y4 pseudogene 19; RNA, Ro-associated Y3; hypothetical LOC100132111; RNA, Ro-associated Y4
8128245	RNY4P19	Homo sapiens	hypothetical LOC100271832; RNA, Ro-associated Y5 pseudogene 10; RNA, Ro-associated Y1; RNA, Ro-associated Y4 pseudogene 7; RNA, Ro-associated Y4 pseudogene 19; RNA, Ro-associated Y3; hypothetical LOC100132111; RNA, Ro-associated Y4
8128245	RNY3	Homo sapiens	hypothetical LOC100271832; RNA, Ro-associated Y5 pseudogene 10; RNA, Ro-associated Y1; RNA, Ro-associated Y4 pseudogene 7; RNA, Ro-associated Y4 pseudogene 19; RNA, Ro-associated Y3; hypothetical LOC100132111; RNA, Ro-associated Y4
8128245	RNY4	Homo sapiens	hypothetical LOC100271832; RNA, Ro-associated Y5 pseudogene 10; RNA, Ro-associated Y1; RNA, Ro-associated Y4 pseudogene 7; RNA, Ro-associated Y4 pseudogene 19; RNA, Ro-associated Y3; hypothetical LOC100132111; RNA, Ro-associated Y4
8129379	echdc1	Homo sapiens	enoyl Coenzyme A hydratase domain containing 1
8092226	RNU6-2	Homo sapiens	RNA, U6 small nuclear 2; RNA, U6 small nuclear 1
8092226	RNU6-1	Homo sapiens	RNA, U6 small nuclear 2; RNA, U6 small nuclear 1
8147079	LRRCC1	Homo sapiens	leucine rich repeat and coiled-coil domain containing 1
8014633	TBC1D3C	Homo sapiens	TBC1 domain family, member 3E; TBC1 domain family, member 3F; TBC1 domain family, member 3G; TBC1 domain family member 3C-like protein ENSP00000341742; TBC1 domain family, member 3H; TBC1 domain family, member 3; TBC1 domain family, member 3I; TBC1 domain family, member 3B; TBC1 domain family, member 3C
8014633	TBC1D3F	Homo sapiens	TBC1 domain family, member 3E; TBC1 domain family, member 3F; TBC1 domain family, member 3G; TBC1 domain family member 3C-like protein ENSP00000341742; TBC1 domain family, member 3H; TBC1 domain family, member 3; TBC1 domain family, member 3I; TBC1 domain family, member 3B; TBC1 domain family, member 3C
8014633	TBC1D3G	Homo sapiens	TBC1 domain family, member 3E; TBC1 domain family, member 3F; TBC1 domain family, member 3G; TBC1 domain family member 3C-like protein ENSP00000341742; TBC1 domain family, member 3H; TBC1 domain family, member 3; TBC1 domain family, member 3I; TBC1 domain family, member 3B; TBC1 domain family, member 3C
8014633	TBC1D3H	Homo sapiens	TBC1 domain family, member 3E; TBC1 domain family, member 3F; TBC1 domain family, member 3G; TBC1 domain family member 3C-like protein ENSP00000341742; TBC1 domain family, member 3H; TBC1 domain family, member 3; TBC1 domain family, member 3I; TBC1 domain family, member 3B; TBC1 domain family, member 3C
8014633	LOC653380	Homo sapiens	TBC1 domain family, member 3E; TBC1 domain family, member 3F; TBC1 domain family, member 3G; TBC1 domain family member 3C-like protein ENSP00000341742; TBC1 domain family, member 3H; TBC1 domain family, member 3; TBC1 domain family, member 3I; TBC1 domain family, member 3B; TBC1 domain family, member 3C
8014633	TBC1D3	Homo sapiens	TBC1 domain family, member 3E; TBC1 domain family, member 3F; TBC1 domain family, member 3G; TBC1 domain family member 3C-like protein ENSP00000341742; TBC1 domain family, member 3H; TBC1 domain family, member 3; TBC1 domain family, member 3I; TBC1 domain family, member 3B; TBC1 domain family, member 3C
8014633	TBC1D3B	Homo sapiens	TBC1 domain family, member 3E; TBC1 domain family, member 3F; TBC1 domain family, member 3G; TBC1 domain family member 3C-like protein ENSP00000341742; TBC1 domain family, member 3H; TBC1 domain family, member 3; TBC1 domain family, member 3I; TBC1 domain family, member 3B; TBC1 domain family, member 3C
8107857	RN5S10	Homo sapiens	RNA, 5S ribosomal 9; RNA, 5S ribosomal 13; RNA, 5S ribosomal 12; RNA, 5S ribosomal 11; RNA, 5S ribosomal 10; RNA, 5S ribosomal 17; RNA, 5S ribosomal 16; RNA, 5S ribosomal 15; RNA, 5S ribosomal 14; RNA, 5S ribosomal 1; RNA, 5S ribosomal 2; RNA, 5S ribosomal 3; RNA, 5S ribosomal 4; RNA, 5S ribosomal 5; RNA, 5S ribosomal 6; RNA, 5S ribosomal 7; RNA, 5S ribosomal 8
8107857	RN5S11	Homo sapiens	RNA, 5S ribosomal 9; RNA, 5S ribosomal 13; RNA, 5S ribosomal 12; RNA, 5S ribosomal 11; RNA, 5S ribosomal 10; RNA, 5S ribosomal 17; RNA, 5S ribosomal 16; RNA, 5S ribosomal 15; RNA, 5S ribosomal 14; RNA, 5S ribosomal 1; RNA, 5S ribosomal 2; RNA, 5S ribosomal 3; RNA, 5S ribosomal 4; RNA, 5S ribosomal 5; RNA, 5S ribosomal 6; RNA, 5S ribosomal 7; RNA, 5S ribosomal 8
8107857	RN5S12	Homo sapiens	RNA, 5S ribosomal 9; RNA, 5S ribosomal 13; RNA, 5S ribosomal 12; RNA, 5S ribosomal 11; RNA, 5S ribosomal 10; RNA, 5S ribosomal 17; RNA, 5S ribosomal 16; RNA, 5S ribosomal 15; RNA, 5S ribosomal 14; RNA, 5S ribosomal 1; RNA, 5S ribosomal 2; RNA, 5S ribosomal 3; RNA, 5S ribosomal 4; RNA, 5S ribosomal 5; RNA, 5S ribosomal 6; RNA, 5S ribosomal 7; RNA, 5S ribosomal 8
8107857	RN5S13	Homo sapiens	RNA, 5S ribosomal 9; RNA, 5S ribosomal 13; RNA, 5S ribosomal 12; RNA, 5S ribosomal 11; RNA, 5S ribosomal 10; RNA, 5S ribosomal 17; RNA, 5S ribosomal 16; RNA, 5S ribosomal 15; RNA, 5S ribosomal 14; RNA, 5S ribosomal 1; RNA, 5S ribosomal 2; RNA, 5S ribosomal 3; RNA, 5S ribosomal 4; RNA, 5S ribosomal 5; RNA, 5S ribosomal 6; RNA, 5S ribosomal 7; RNA, 5S ribosomal 8
8107857	RN5S14	Homo sapiens	RNA, 5S ribosomal 9; RNA, 5S ribosomal 13; RNA, 5S ribosomal 12; RNA, 5S ribosomal 11; RNA, 5S ribosomal 10; RNA, 5S ribosomal 17; RNA, 5S ribosomal 16; RNA, 5S ribosomal 15; RNA, 5S ribosomal 14; RNA, 5S ribosomal 1; RNA, 5S ribosomal 2; RNA, 5S ribosomal 3; RNA, 5S ribosomal 4; RNA, 5S ribosomal 5; RNA, 5S ribosomal 6; RNA, 5S ribosomal 7; RNA, 5S ribosomal 8
8107857	RN5S15	Homo sapiens	RNA, 5S ribosomal 9; RNA, 5S ribosomal 13; RNA, 5S ribosomal 12; RNA, 5S ribosomal 11; RNA, 5S ribosomal 10; RNA, 5S ribosomal 17; RNA, 5S ribosomal 16; RNA, 5S ribosomal 15; RNA, 5S ribosomal 14; RNA, 5S ribosomal 1; RNA, 5S ribosomal 2; RNA, 5S ribosomal 3; RNA, 5S ribosomal 4; RNA, 5S ribosomal 5; RNA, 5S ribosomal 6; RNA, 5S ribosomal 7; RNA, 5S ribosomal 8
8107857	RN5S16	Homo sapiens	RNA, 5S ribosomal 9; RNA, 5S ribosomal 13; RNA, 5S ribosomal 12; RNA, 5S ribosomal 11; RNA, 5S ribosomal 10; RNA, 5S ribosomal 17; RNA, 5S ribosomal 16; RNA, 5S ribosomal 15; RNA, 5S ribosomal 14; RNA, 5S ribosomal 1; RNA, 5S ribosomal 2; RNA, 5S ribosomal 3; RNA, 5S ribosomal 4; RNA, 5S ribosomal 5; RNA, 5S ribosomal 6; RNA, 5S ribosomal 7; RNA, 5S ribosomal 8
8107857	RN5S6	Homo sapiens	RNA, 5S ribosomal 9; RNA, 5S ribosomal 13; RNA, 5S ribosomal 12; RNA, 5S ribosomal 11; RNA, 5S ribosomal 10; RNA, 5S ribosomal 17; RNA, 5S ribosomal 16; RNA, 5S ribosomal 15; RNA, 5S ribosomal 14; RNA, 5S ribosomal 1; RNA, 5S ribosomal 2; RNA, 5S ribosomal 3; RNA, 5S ribosomal 4; RNA, 5S ribosomal 5; RNA, 5S ribosomal 6; RNA, 5S ribosomal 7; RNA, 5S ribosomal 8
8107857	RN5S7	Homo sapiens	RNA, 5S ribosomal 9; RNA, 5S ribosomal 13; RNA, 5S ribosomal 12; RNA, 5S ribosomal 11; RNA, 5S ribosomal 10; RNA, 5S ribosomal 17; RNA, 5S ribosomal 16; RNA, 5S ribosomal 15; RNA, 5S ribosomal 14; RNA, 5S ribosomal 1; RNA, 5S ribosomal 2; RNA, 5S ribosomal 3; RNA, 5S ribosomal 4; RNA, 5S ribosomal 5; RNA, 5S ribosomal 6; RNA, 5S ribosomal 7; RNA, 5S ribosomal 8
8107857	RN5S8	Homo sapiens	RNA, 5S ribosomal 9; RNA, 5S ribosomal 13; RNA, 5S ribosomal 12; RNA, 5S ribosomal 11; RNA, 5S ribosomal 10; RNA, 5S ribosomal 17; RNA, 5S ribosomal 16; RNA, 5S ribosomal 15; RNA, 5S ribosomal 14; RNA, 5S ribosomal 1; RNA, 5S ribosomal 2; RNA, 5S ribosomal 3; RNA, 5S ribosomal 4; RNA, 5S ribosomal 5; RNA, 5S ribosomal 6; RNA, 5S ribosomal 7; RNA, 5S ribosomal 8
8107857	RN5S9	Homo sapiens	RNA, 5S ribosomal 9; RNA, 5S ribosomal 13; RNA, 5S ribosomal 12; RNA, 5S ribosomal 11; RNA, 5S ribosomal 10; RNA, 5S ribosomal 17; RNA, 5S ribosomal 16; RNA, 5S ribosomal 15; RNA, 5S ribosomal 14; RNA, 5S ribosomal 1; RNA, 5S ribosomal 2; RNA, 5S ribosomal 3; RNA, 5S ribosomal 4; RNA, 5S ribosomal 5; RNA, 5S ribosomal 6; RNA, 5S ribosomal 7; RNA, 5S ribosomal 8
8107857	RN5S2	Homo sapiens	RNA, 5S ribosomal 9; RNA, 5S ribosomal 13; RNA, 5S ribosomal 12; RNA, 5S ribosomal 11; RNA, 5S ribosomal 10; RNA, 5S ribosomal 17; RNA, 5S ribosomal 16; RNA, 5S ribosomal 15; RNA, 5S ribosomal 14; RNA, 5S ribosomal 1; RNA, 5S ribosomal 2; RNA, 5S ribosomal 3; RNA, 5S ribosomal 4; RNA, 5S ribosomal 5; RNA, 5S ribosomal 6; RNA, 5S ribosomal 7; RNA, 5S ribosomal 8
8107857	RN5S3	Homo sapiens	RNA, 5S ribosomal 9; RNA, 5S ribosomal 13; RNA, 5S ribosomal 12; RNA, 5S ribosomal 11; RNA, 5S ribosomal 10; RNA, 5S ribosomal 17; RNA, 5S ribosomal 16; RNA, 5S ribosomal 15; RNA, 5S ribosomal 14; RNA, 5S ribosomal 1; RNA, 5S ribosomal 2; RNA, 5S ribosomal 3; RNA, 5S ribosomal 4; RNA, 5S ribosomal 5; RNA, 5S ribosomal 6; RNA, 5S ribosomal 7; RNA, 5S ribosomal 8
8107857	RN5S4	Homo sapiens	RNA, 5S ribosomal 9; RNA, 5S ribosomal 13; RNA, 5S ribosomal 12; RNA, 5S ribosomal 11; RNA, 5S ribosomal 10; RNA, 5S ribosomal 17; RNA, 5S ribosomal 16; RNA, 5S ribosomal 15; RNA, 5S ribosomal 14; RNA, 5S ribosomal 1; RNA, 5S ribosomal 2; RNA, 5S ribosomal 3; RNA, 5S ribosomal 4; RNA, 5S ribosomal 5; RNA, 5S ribosomal 6; RNA, 5S ribosomal 7; RNA, 5S ribosomal 8
8107857	RN5S5	Homo sapiens	RNA, 5S ribosomal 9; RNA, 5S ribosomal 13; RNA, 5S ribosomal 12; RNA, 5S ribosomal 11; RNA, 5S ribosomal 10; RNA, 5S ribosomal 17; RNA, 5S ribosomal 16; RNA, 5S ribosomal 15; RNA, 5S ribosomal 14; RNA, 5S ribosomal 1; RNA, 5S ribosomal 2; RNA, 5S ribosomal 3; RNA, 5S ribosomal 4; RNA, 5S ribosomal 5; RNA, 5S ribosomal 6; RNA, 5S ribosomal 7; RNA, 5S ribosomal 8
8107857	RN5S1	Homo sapiens	RNA, 5S ribosomal 9; RNA, 5S ribosomal 13; RNA, 5S ribosomal 12; RNA, 5S ribosomal 11; RNA, 5S ribosomal 10; RNA, 5S ribosomal 17; RNA, 5S ribosomal 16; RNA, 5S ribosomal 15; RNA, 5S ribosomal 14; RNA, 5S ribosomal 1; RNA, 5S ribosomal 2; RNA, 5S ribosomal 3; RNA, 5S ribosomal 4; RNA, 5S ribosomal 5; RNA, 5S ribosomal 6; RNA, 5S ribosomal 7; RNA, 5S ribosomal 8
8107857	RN5S17	Homo sapiens	RNA, 5S ribosomal 9; RNA, 5S ribosomal 13; RNA, 5S ribosomal 12; RNA, 5S ribosomal 11; RNA, 5S ribosomal 10; RNA, 5S ribosomal 17; RNA, 5S ribosomal 16; RNA, 5S ribosomal 15; RNA, 5S ribosomal 14; RNA, 5S ribosomal 1; RNA, 5S ribosomal 2; RNA, 5S ribosomal 3; RNA, 5S ribosomal 4; RNA, 5S ribosomal 5; RNA, 5S ribosomal 6; RNA, 5S ribosomal 7; RNA, 5S ribosomal 8
8177130	NHEDC1P2	Homo sapiens	Na+/H+ exchanger domain containing 1 pseudogene
8031027	MIR520B	Homo sapiens	microRNA 520b
8100768	UGT2B10	Homo sapiens	UDP glucuronosyltransferase 2 family, polypeptide B10
7923162	RNY4P7	Homo sapiens	hypothetical LOC100271832; RNA, Ro-associated Y5 pseudogene 10; RNA, Ro-associated Y1; RNA, Ro-associated Y4 pseudogene 7; RNA, Ro-associated Y4 pseudogene 19; RNA, Ro-associated Y3; hypothetical LOC100132111; RNA, Ro-associated Y4
7923162	LOC100271832	Homo sapiens	hypothetical LOC100271832; RNA, Ro-associated Y5 pseudogene 10; RNA, Ro-associated Y1; RNA, Ro-associated Y4 pseudogene 7; RNA, Ro-associated Y4 pseudogene 19; RNA, Ro-associated Y3; hypothetical LOC100132111; RNA, Ro-associated Y4
7923162	RNY5P10	Homo sapiens	hypothetical LOC100271832; RNA, Ro-associated Y5 pseudogene 10; RNA, Ro-associated Y1; RNA, Ro-associated Y4 pseudogene 7; RNA, Ro-associated Y4 pseudogene 19; RNA, Ro-associated Y3; hypothetical LOC100132111; RNA, Ro-associated Y4
7923162	RNY1	Homo sapiens	hypothetical LOC100271832; RNA, Ro-associated Y5 pseudogene 10; RNA, Ro-associated Y1; RNA, Ro-associated Y4 pseudogene 7; RNA, Ro-associated Y4 pseudogene 19; RNA, Ro-associated Y3; hypothetical LOC100132111; RNA, Ro-associated Y4
7923162	LOC100132111	Homo sapiens	hypothetical LOC100271832; RNA, Ro-associated Y5 pseudogene 10; RNA, Ro-associated Y1; RNA, Ro-associated Y4 pseudogene 7; RNA, Ro-associated Y4 pseudogene 19; RNA, Ro-associated Y3; hypothetical LOC100132111; RNA, Ro-associated Y4
7923162	RNY4P19	Homo sapiens	hypothetical LOC100271832; RNA, Ro-associated Y5 pseudogene 10; RNA, Ro-associated Y1; RNA, Ro-associated Y4 pseudogene 7; RNA, Ro-associated Y4 pseudogene 19; RNA, Ro-associated Y3; hypothetical LOC100132111; RNA, Ro-associated Y4
7923162	RNY3	Homo sapiens	hypothetical LOC100271832; RNA, Ro-associated Y5 pseudogene 10; RNA, Ro-associated Y1; RNA, Ro-associated Y4 pseudogene 7; RNA, Ro-associated Y4 pseudogene 19; RNA, Ro-associated Y3; hypothetical LOC100132111; RNA, Ro-associated Y4
7923162	RNY4	Homo sapiens	hypothetical LOC100271832; RNA, Ro-associated Y5 pseudogene 10; RNA, Ro-associated Y1; RNA, Ro-associated Y4 pseudogene 7; RNA, Ro-associated Y4 pseudogene 19; RNA, Ro-associated Y3; hypothetical LOC100132111; RNA, Ro-associated Y4
7957458	Nts	Homo sapiens	neurotensin
7894501	psmb2	Homo sapiens	proteasome (prosome, macropain) subunit, beta type, 2
8081115	ARL13B	Homo sapiens	ADP-ribosylation factor-like 13B
7923164	ATP6V1G3	Homo sapiens	ATPase, H+ transporting, lysosomal 13kDa, V1 subunit G3
7963046	LOC399942	Homo sapiens	hypothetical gene supported by AF081484; NM_006082; tubulin, alpha 1b
7963046	TUBA1B	Homo sapiens	hypothetical gene supported by AF081484; NM_006082; tubulin, alpha 1b
8050350	RN5S10	Homo sapiens	RNA, 5S ribosomal 9; RNA, 5S ribosomal 13; RNA, 5S ribosomal 12; RNA, 5S ribosomal 11; RNA, 5S ribosomal 10; RNA, 5S ribosomal 17; RNA, 5S ribosomal 16; RNA, 5S ribosomal 15; RNA, 5S ribosomal 14; RNA, 5S ribosomal 1; RNA, 5S ribosomal 2; RNA, 5S ribosomal 3; RNA, 5S ribosomal 4; RNA, 5S ribosomal 5; RNA, 5S ribosomal 6; RNA, 5S ribosomal 7; RNA, 5S ribosomal 8
8050350	RN5S11	Homo sapiens	RNA, 5S ribosomal 9; RNA, 5S ribosomal 13; RNA, 5S ribosomal 12; RNA, 5S ribosomal 11; RNA, 5S ribosomal 10; RNA, 5S ribosomal 17; RNA, 5S ribosomal 16; RNA, 5S ribosomal 15; RNA, 5S ribosomal 14; RNA, 5S ribosomal 1; RNA, 5S ribosomal 2; RNA, 5S ribosomal 3; RNA, 5S ribosomal 4; RNA, 5S ribosomal 5; RNA, 5S ribosomal 6; RNA, 5S ribosomal 7; RNA, 5S ribosomal 8
8050350	RN5S12	Homo sapiens	RNA, 5S ribosomal 9; RNA, 5S ribosomal 13; RNA, 5S ribosomal 12; RNA, 5S ribosomal 11; RNA, 5S ribosomal 10; RNA, 5S ribosomal 17; RNA, 5S ribosomal 16; RNA, 5S ribosomal 15; RNA, 5S ribosomal 14; RNA, 5S ribosomal 1; RNA, 5S ribosomal 2; RNA, 5S ribosomal 3; RNA, 5S ribosomal 4; RNA, 5S ribosomal 5; RNA, 5S ribosomal 6; RNA, 5S ribosomal 7; RNA, 5S ribosomal 8
8050350	RN5S13	Homo sapiens	RNA, 5S ribosomal 9; RNA, 5S ribosomal 13; RNA, 5S ribosomal 12; RNA, 5S ribosomal 11; RNA, 5S ribosomal 10; RNA, 5S ribosomal 17; RNA, 5S ribosomal 16; RNA, 5S ribosomal 15; RNA, 5S ribosomal 14; RNA, 5S ribosomal 1; RNA, 5S ribosomal 2; RNA, 5S ribosomal 3; RNA, 5S ribosomal 4; RNA, 5S ribosomal 5; RNA, 5S ribosomal 6; RNA, 5S ribosomal 7; RNA, 5S ribosomal 8
8050350	RN5S14	Homo sapiens	RNA, 5S ribosomal 9; RNA, 5S ribosomal 13; RNA, 5S ribosomal 12; RNA, 5S ribosomal 11; RNA, 5S ribosomal 10; RNA, 5S ribosomal 17; RNA, 5S ribosomal 16; RNA, 5S ribosomal 15; RNA, 5S ribosomal 14; RNA, 5S ribosomal 1; RNA, 5S ribosomal 2; RNA, 5S ribosomal 3; RNA, 5S ribosomal 4; RNA, 5S ribosomal 5; RNA, 5S ribosomal 6; RNA, 5S ribosomal 7; RNA, 5S ribosomal 8
8050350	RN5S15	Homo sapiens	RNA, 5S ribosomal 9; RNA, 5S ribosomal 13; RNA, 5S ribosomal 12; RNA, 5S ribosomal 11; RNA, 5S ribosomal 10; RNA, 5S ribosomal 17; RNA, 5S ribosomal 16; RNA, 5S ribosomal 15; RNA, 5S ribosomal 14; RNA, 5S ribosomal 1; RNA, 5S ribosomal 2; RNA, 5S ribosomal 3; RNA, 5S ribosomal 4; RNA, 5S ribosomal 5; RNA, 5S ribosomal 6; RNA, 5S ribosomal 7; RNA, 5S ribosomal 8
8050350	RN5S16	Homo sapiens	RNA, 5S ribosomal 9; RNA, 5S ribosomal 13; RNA, 5S ribosomal 12; RNA, 5S ribosomal 11; RNA, 5S ribosomal 10; RNA, 5S ribosomal 17; RNA, 5S ribosomal 16; RNA, 5S ribosomal 15; RNA, 5S ribosomal 14; RNA, 5S ribosomal 1; RNA, 5S ribosomal 2; RNA, 5S ribosomal 3; RNA, 5S ribosomal 4; RNA, 5S ribosomal 5; RNA, 5S ribosomal 6; RNA, 5S ribosomal 7; RNA, 5S ribosomal 8
8050350	RN5S6	Homo sapiens	RNA, 5S ribosomal 9; RNA, 5S ribosomal 13; RNA, 5S ribosomal 12; RNA, 5S ribosomal 11; RNA, 5S ribosomal 10; RNA, 5S ribosomal 17; RNA, 5S ribosomal 16; RNA, 5S ribosomal 15; RNA, 5S ribosomal 14; RNA, 5S ribosomal 1; RNA, 5S ribosomal 2; RNA, 5S ribosomal 3; RNA, 5S ribosomal 4; RNA, 5S ribosomal 5; RNA, 5S ribosomal 6; RNA, 5S ribosomal 7; RNA, 5S ribosomal 8
8050350	RN5S7	Homo sapiens	RNA, 5S ribosomal 9; RNA, 5S ribosomal 13; RNA, 5S ribosomal 12; RNA, 5S ribosomal 11; RNA, 5S ribosomal 10; RNA, 5S ribosomal 17; RNA, 5S ribosomal 16; RNA, 5S ribosomal 15; RNA, 5S ribosomal 14; RNA, 5S ribosomal 1; RNA, 5S ribosomal 2; RNA, 5S ribosomal 3; RNA, 5S ribosomal 4; RNA, 5S ribosomal 5; RNA, 5S ribosomal 6; RNA, 5S ribosomal 7; RNA, 5S ribosomal 8
8050350	RN5S8	Homo sapiens	RNA, 5S ribosomal 9; RNA, 5S ribosomal 13; RNA, 5S ribosomal 12; RNA, 5S ribosomal 11; RNA, 5S ribosomal 10; RNA, 5S ribosomal 17; RNA, 5S ribosomal 16; RNA, 5S ribosomal 15; RNA, 5S ribosomal 14; RNA, 5S ribosomal 1; RNA, 5S ribosomal 2; RNA, 5S ribosomal 3; RNA, 5S ribosomal 4; RNA, 5S ribosomal 5; RNA, 5S ribosomal 6; RNA, 5S ribosomal 7; RNA, 5S ribosomal 8
8050350	RN5S9	Homo sapiens	RNA, 5S ribosomal 9; RNA, 5S ribosomal 13; RNA, 5S ribosomal 12; RNA, 5S ribosomal 11; RNA, 5S ribosomal 10; RNA, 5S ribosomal 17; RNA, 5S ribosomal 16; RNA, 5S ribosomal 15; RNA, 5S ribosomal 14; RNA, 5S ribosomal 1; RNA, 5S ribosomal 2; RNA, 5S ribosomal 3; RNA, 5S ribosomal 4; RNA, 5S ribosomal 5; RNA, 5S ribosomal 6; RNA, 5S ribosomal 7; RNA, 5S ribosomal 8
8050350	RN5S2	Homo sapiens	RNA, 5S ribosomal 9; RNA, 5S ribosomal 13; RNA, 5S ribosomal 12; RNA, 5S ribosomal 11; RNA, 5S ribosomal 10; RNA, 5S ribosomal 17; RNA, 5S ribosomal 16; RNA, 5S ribosomal 15; RNA, 5S ribosomal 14; RNA, 5S ribosomal 1; RNA, 5S ribosomal 2; RNA, 5S ribosomal 3; RNA, 5S ribosomal 4; RNA, 5S ribosomal 5; RNA, 5S ribosomal 6; RNA, 5S ribosomal 7; RNA, 5S ribosomal 8
8050350	RN5S3	Homo sapiens	RNA, 5S ribosomal 9; RNA, 5S ribosomal 13; RNA, 5S ribosomal 12; RNA, 5S ribosomal 11; RNA, 5S ribosomal 10; RNA, 5S ribosomal 17; RNA, 5S ribosomal 16; RNA, 5S ribosomal 15; RNA, 5S ribosomal 14; RNA, 5S ribosomal 1; RNA, 5S ribosomal 2; RNA, 5S ribosomal 3; RNA, 5S ribosomal 4; RNA, 5S ribosomal 5; RNA, 5S ribosomal 6; RNA, 5S ribosomal 7; RNA, 5S ribosomal 8
8050350	RN5S4	Homo sapiens	RNA, 5S ribosomal 9; RNA, 5S ribosomal 13; RNA, 5S ribosomal 12; RNA, 5S ribosomal 11; RNA, 5S ribosomal 10; RNA, 5S ribosomal 17; RNA, 5S ribosomal 16; RNA, 5S ribosomal 15; RNA, 5S ribosomal 14; RNA, 5S ribosomal 1; RNA, 5S ribosomal 2; RNA, 5S ribosomal 3; RNA, 5S ribosomal 4; RNA, 5S ribosomal 5; RNA, 5S ribosomal 6; RNA, 5S ribosomal 7; RNA, 5S ribosomal 8
8050350	RN5S5	Homo sapiens	RNA, 5S ribosomal 9; RNA, 5S ribosomal 13; RNA, 5S ribosomal 12; RNA, 5S ribosomal 11; RNA, 5S ribosomal 10; RNA, 5S ribosomal 17; RNA, 5S ribosomal 16; RNA, 5S ribosomal 15; RNA, 5S ribosomal 14; RNA, 5S ribosomal 1; RNA, 5S ribosomal 2; RNA, 5S ribosomal 3; RNA, 5S ribosomal 4; RNA, 5S ribosomal 5; RNA, 5S ribosomal 6; RNA, 5S ribosomal 7; RNA, 5S ribosomal 8
8050350	RN5S1	Homo sapiens	RNA, 5S ribosomal 9; RNA, 5S ribosomal 13; RNA, 5S ribosomal 12; RNA, 5S ribosomal 11; RNA, 5S ribosomal 10; RNA, 5S ribosomal 17; RNA, 5S ribosomal 16; RNA, 5S ribosomal 15; RNA, 5S ribosomal 14; RNA, 5S ribosomal 1; RNA, 5S ribosomal 2; RNA, 5S ribosomal 3; RNA, 5S ribosomal 4; RNA, 5S ribosomal 5; RNA, 5S ribosomal 6; RNA, 5S ribosomal 7; RNA, 5S ribosomal 8
8050350	RN5S17	Homo sapiens	RNA, 5S ribosomal 9; RNA, 5S ribosomal 13; RNA, 5S ribosomal 12; RNA, 5S ribosomal 11; RNA, 5S ribosomal 10; RNA, 5S ribosomal 17; RNA, 5S ribosomal 16; RNA, 5S ribosomal 15; RNA, 5S ribosomal 14; RNA, 5S ribosomal 1; RNA, 5S ribosomal 2; RNA, 5S ribosomal 3; RNA, 5S ribosomal 4; RNA, 5S ribosomal 5; RNA, 5S ribosomal 6; RNA, 5S ribosomal 7; RNA, 5S ribosomal 8
8012841	RN5S10	Homo sapiens	RNA, 5S ribosomal 9; RNA, 5S ribosomal 13; RNA, 5S ribosomal 12; RNA, 5S ribosomal 11; RNA, 5S ribosomal 10; RNA, 5S ribosomal 17; RNA, 5S ribosomal 16; RNA, 5S ribosomal 15; RNA, 5S ribosomal 14; RNA, 5S ribosomal 1; RNA, 5S ribosomal 2; RNA, 5S ribosomal 3; RNA, 5S ribosomal 4; RNA, 5S ribosomal 5; RNA, 5S ribosomal 6; RNA, 5S ribosomal 7; RNA, 5S ribosomal 8
8012841	RN5S11	Homo sapiens	RNA, 5S ribosomal 9; RNA, 5S ribosomal 13; RNA, 5S ribosomal 12; RNA, 5S ribosomal 11; RNA, 5S ribosomal 10; RNA, 5S ribosomal 17; RNA, 5S ribosomal 16; RNA, 5S ribosomal 15; RNA, 5S ribosomal 14; RNA, 5S ribosomal 1; RNA, 5S ribosomal 2; RNA, 5S ribosomal 3; RNA, 5S ribosomal 4; RNA, 5S ribosomal 5; RNA, 5S ribosomal 6; RNA, 5S ribosomal 7; RNA, 5S ribosomal 8
8012841	RN5S12	Homo sapiens	RNA, 5S ribosomal 9; RNA, 5S ribosomal 13; RNA, 5S ribosomal 12; RNA, 5S ribosomal 11; RNA, 5S ribosomal 10; RNA, 5S ribosomal 17; RNA, 5S ribosomal 16; RNA, 5S ribosomal 15; RNA, 5S ribosomal 14; RNA, 5S ribosomal 1; RNA, 5S ribosomal 2; RNA, 5S ribosomal 3; RNA, 5S ribosomal 4; RNA, 5S ribosomal 5; RNA, 5S ribosomal 6; RNA, 5S ribosomal 7; RNA, 5S ribosomal 8
8012841	RN5S13	Homo sapiens	RNA, 5S ribosomal 9; RNA, 5S ribosomal 13; RNA, 5S ribosomal 12; RNA, 5S ribosomal 11; RNA, 5S ribosomal 10; RNA, 5S ribosomal 17; RNA, 5S ribosomal 16; RNA, 5S ribosomal 15; RNA, 5S ribosomal 14; RNA, 5S ribosomal 1; RNA, 5S ribosomal 2; RNA, 5S ribosomal 3; RNA, 5S ribosomal 4; RNA, 5S ribosomal 5; RNA, 5S ribosomal 6; RNA, 5S ribosomal 7; RNA, 5S ribosomal 8
8012841	RN5S14	Homo sapiens	RNA, 5S ribosomal 9; RNA, 5S ribosomal 13; RNA, 5S ribosomal 12; RNA, 5S ribosomal 11; RNA, 5S ribosomal 10; RNA, 5S ribosomal 17; RNA, 5S ribosomal 16; RNA, 5S ribosomal 15; RNA, 5S ribosomal 14; RNA, 5S ribosomal 1; RNA, 5S ribosomal 2; RNA, 5S ribosomal 3; RNA, 5S ribosomal 4; RNA, 5S ribosomal 5; RNA, 5S ribosomal 6; RNA, 5S ribosomal 7; RNA, 5S ribosomal 8
8012841	RN5S15	Homo sapiens	RNA, 5S ribosomal 9; RNA, 5S ribosomal 13; RNA, 5S ribosomal 12; RNA, 5S ribosomal 11; RNA, 5S ribosomal 10; RNA, 5S ribosomal 17; RNA, 5S ribosomal 16; RNA, 5S ribosomal 15; RNA, 5S ribosomal 14; RNA, 5S ribosomal 1; RNA, 5S ribosomal 2; RNA, 5S ribosomal 3; RNA, 5S ribosomal 4; RNA, 5S ribosomal 5; RNA, 5S ribosomal 6; RNA, 5S ribosomal 7; RNA, 5S ribosomal 8
8012841	RN5S16	Homo sapiens	RNA, 5S ribosomal 9; RNA, 5S ribosomal 13; RNA, 5S ribosomal 12; RNA, 5S ribosomal 11; RNA, 5S ribosomal 10; RNA, 5S ribosomal 17; RNA, 5S ribosomal 16; RNA, 5S ribosomal 15; RNA, 5S ribosomal 14; RNA, 5S ribosomal 1; RNA, 5S ribosomal 2; RNA, 5S ribosomal 3; RNA, 5S ribosomal 4; RNA, 5S ribosomal 5; RNA, 5S ribosomal 6; RNA, 5S ribosomal 7; RNA, 5S ribosomal 8
8012841	RN5S6	Homo sapiens	RNA, 5S ribosomal 9; RNA, 5S ribosomal 13; RNA, 5S ribosomal 12; RNA, 5S ribosomal 11; RNA, 5S ribosomal 10; RNA, 5S ribosomal 17; RNA, 5S ribosomal 16; RNA, 5S ribosomal 15; RNA, 5S ribosomal 14; RNA, 5S ribosomal 1; RNA, 5S ribosomal 2; RNA, 5S ribosomal 3; RNA, 5S ribosomal 4; RNA, 5S ribosomal 5; RNA, 5S ribosomal 6; RNA, 5S ribosomal 7; RNA, 5S ribosomal 8
8012841	RN5S7	Homo sapiens	RNA, 5S ribosomal 9; RNA, 5S ribosomal 13; RNA, 5S ribosomal 12; RNA, 5S ribosomal 11; RNA, 5S ribosomal 10; RNA, 5S ribosomal 17; RNA, 5S ribosomal 16; RNA, 5S ribosomal 15; RNA, 5S ribosomal 14; RNA, 5S ribosomal 1; RNA, 5S ribosomal 2; RNA, 5S ribosomal 3; RNA, 5S ribosomal 4; RNA, 5S ribosomal 5; RNA, 5S ribosomal 6; RNA, 5S ribosomal 7; RNA, 5S ribosomal 8
8012841	RN5S8	Homo sapiens	RNA, 5S ribosomal 9; RNA, 5S ribosomal 13; RNA, 5S ribosomal 12; RNA, 5S ribosomal 11; RNA, 5S ribosomal 10; RNA, 5S ribosomal 17; RNA, 5S ribosomal 16; RNA, 5S ribosomal 15; RNA, 5S ribosomal 14; RNA, 5S ribosomal 1; RNA, 5S ribosomal 2; RNA, 5S ribosomal 3; RNA, 5S ribosomal 4; RNA, 5S ribosomal 5; RNA, 5S ribosomal 6; RNA, 5S ribosomal 7; RNA, 5S ribosomal 8
8012841	RN5S9	Homo sapiens	RNA, 5S ribosomal 9; RNA, 5S ribosomal 13; RNA, 5S ribosomal 12; RNA, 5S ribosomal 11; RNA, 5S ribosomal 10; RNA, 5S ribosomal 17; RNA, 5S ribosomal 16; RNA, 5S ribosomal 15; RNA, 5S ribosomal 14; RNA, 5S ribosomal 1; RNA, 5S ribosomal 2; RNA, 5S ribosomal 3; RNA, 5S ribosomal 4; RNA, 5S ribosomal 5; RNA, 5S ribosomal 6; RNA, 5S ribosomal 7; RNA, 5S ribosomal 8
8012841	RN5S2	Homo sapiens	RNA, 5S ribosomal 9; RNA, 5S ribosomal 13; RNA, 5S ribosomal 12; RNA, 5S ribosomal 11; RNA, 5S ribosomal 10; RNA, 5S ribosomal 17; RNA, 5S ribosomal 16; RNA, 5S ribosomal 15; RNA, 5S ribosomal 14; RNA, 5S ribosomal 1; RNA, 5S ribosomal 2; RNA, 5S ribosomal 3; RNA, 5S ribosomal 4; RNA, 5S ribosomal 5; RNA, 5S ribosomal 6; RNA, 5S ribosomal 7; RNA, 5S ribosomal 8
8012841	RN5S3	Homo sapiens	RNA, 5S ribosomal 9; RNA, 5S ribosomal 13; RNA, 5S ribosomal 12; RNA, 5S ribosomal 11; RNA, 5S ribosomal 10; RNA, 5S ribosomal 17; RNA, 5S ribosomal 16; RNA, 5S ribosomal 15; RNA, 5S ribosomal 14; RNA, 5S ribosomal 1; RNA, 5S ribosomal 2; RNA, 5S ribosomal 3; RNA, 5S ribosomal 4; RNA, 5S ribosomal 5; RNA, 5S ribosomal 6; RNA, 5S ribosomal 7; RNA, 5S ribosomal 8
8012841	RN5S4	Homo sapiens	RNA, 5S ribosomal 9; RNA, 5S ribosomal 13; RNA, 5S ribosomal 12; RNA, 5S ribosomal 11; RNA, 5S ribosomal 10; RNA, 5S ribosomal 17; RNA, 5S ribosomal 16; RNA, 5S ribosomal 15; RNA, 5S ribosomal 14; RNA, 5S ribosomal 1; RNA, 5S ribosomal 2; RNA, 5S ribosomal 3; RNA, 5S ribosomal 4; RNA, 5S ribosomal 5; RNA, 5S ribosomal 6; RNA, 5S ribosomal 7; RNA, 5S ribosomal 8
8012841	RN5S5	Homo sapiens	RNA, 5S ribosomal 9; RNA, 5S ribosomal 13; RNA, 5S ribosomal 12; RNA, 5S ribosomal 11; RNA, 5S ribosomal 10; RNA, 5S ribosomal 17; RNA, 5S ribosomal 16; RNA, 5S ribosomal 15; RNA, 5S ribosomal 14; RNA, 5S ribosomal 1; RNA, 5S ribosomal 2; RNA, 5S ribosomal 3; RNA, 5S ribosomal 4; RNA, 5S ribosomal 5; RNA, 5S ribosomal 6; RNA, 5S ribosomal 7; RNA, 5S ribosomal 8
8012841	RN5S1	Homo sapiens	RNA, 5S ribosomal 9; RNA, 5S ribosomal 13; RNA, 5S ribosomal 12; RNA, 5S ribosomal 11; RNA, 5S ribosomal 10; RNA, 5S ribosomal 17; RNA, 5S ribosomal 16; RNA, 5S ribosomal 15; RNA, 5S ribosomal 14; RNA, 5S ribosomal 1; RNA, 5S ribosomal 2; RNA, 5S ribosomal 3; RNA, 5S ribosomal 4; RNA, 5S ribosomal 5; RNA, 5S ribosomal 6; RNA, 5S ribosomal 7; RNA, 5S ribosomal 8
8012841	RN5S17	Homo sapiens	RNA, 5S ribosomal 9; RNA, 5S ribosomal 13; RNA, 5S ribosomal 12; RNA, 5S ribosomal 11; RNA, 5S ribosomal 10; RNA, 5S ribosomal 17; RNA, 5S ribosomal 16; RNA, 5S ribosomal 15; RNA, 5S ribosomal 14; RNA, 5S ribosomal 1; RNA, 5S ribosomal 2; RNA, 5S ribosomal 3; RNA, 5S ribosomal 4; RNA, 5S ribosomal 5; RNA, 5S ribosomal 6; RNA, 5S ribosomal 7; RNA, 5S ribosomal 8
7974387	STYX	Homo sapiens	serine/threonine/tyrosine interacting protein
8081503	DZIP3	Homo sapiens	DAZ interacting protein 3, zinc finger
7892797	LIAS	Homo sapiens	lipoic acid synthetase
8073332	RNU6-2	Homo sapiens	RNA, U6 small nuclear 2; RNA, U6 small nuclear 1
8073332	RNU6-1	Homo sapiens	RNA, U6 small nuclear 2; RNA, U6 small nuclear 1
8042086	VRK2	Homo sapiens	vaccinia related kinase 2
8056909	Atf2	Homo sapiens	activating transcription factor 2
7894916	Snord14c	Homo sapiens	RNA, small nucleolar; small nucleolar RNA, C/D box 14A; small nucleolar RNA, C/D box 14B
7894916	SNORD14D	Homo sapiens	RNA, small nucleolar; small nucleolar RNA, C/D box 14A; small nucleolar RNA, C/D box 14B
7894916	SNORD14B	Homo sapiens	RNA, small nucleolar; small nucleolar RNA, C/D box 14A; small nucleolar RNA, C/D box 14B
7894916	SNORD14A	Homo sapiens	RNA, small nucleolar; small nucleolar RNA, C/D box 14A; small nucleolar RNA, C/D box 14B
7894916	SNORD14E	Homo sapiens	RNA, small nucleolar; small nucleolar RNA, C/D box 14A; small nucleolar RNA, C/D box 14B
7901982	UBE2U	Homo sapiens	ubiquitin-conjugating enzyme E2U (putative)
7980146	npc2	Homo sapiens	Niemann-Pick disease, type C2
7894914	Hnrnpc	Homo sapiens	heterogeneous nuclear ribonucleoprotein C (C1/C2)
7923175	MIR181A1	Homo sapiens	microRNA 181a-1
7894516	ERH	Homo sapiens	enhancer of rudimentary homolog (Drosophila)
7894515	FNTA	Homo sapiens	farnesyltransferase, CAAX box, alpha
7894512	capns1	Homo sapiens	calpain, small subunit 1
8014704	RN5S10	Homo sapiens	RNA, 5S ribosomal 9; RNA, 5S ribosomal 13; RNA, 5S ribosomal 12; RNA, 5S ribosomal 11; RNA, 5S ribosomal 10; RNA, 5S ribosomal 17; RNA, 5S ribosomal 16; RNA, 5S ribosomal 15; RNA, 5S ribosomal 14; RNA, 5S ribosomal 1; RNA, 5S ribosomal 2; RNA, 5S ribosomal 3; RNA, 5S ribosomal 4; RNA, 5S ribosomal 5; RNA, 5S ribosomal 6; RNA, 5S ribosomal 7; RNA, 5S ribosomal 8
8014704	RN5S11	Homo sapiens	RNA, 5S ribosomal 9; RNA, 5S ribosomal 13; RNA, 5S ribosomal 12; RNA, 5S ribosomal 11; RNA, 5S ribosomal 10; RNA, 5S ribosomal 17; RNA, 5S ribosomal 16; RNA, 5S ribosomal 15; RNA, 5S ribosomal 14; RNA, 5S ribosomal 1; RNA, 5S ribosomal 2; RNA, 5S ribosomal 3; RNA, 5S ribosomal 4; RNA, 5S ribosomal 5; RNA, 5S ribosomal 6; RNA, 5S ribosomal 7; RNA, 5S ribosomal 8
8014704	RN5S12	Homo sapiens	RNA, 5S ribosomal 9; RNA, 5S ribosomal 13; RNA, 5S ribosomal 12; RNA, 5S ribosomal 11; RNA, 5S ribosomal 10; RNA, 5S ribosomal 17; RNA, 5S ribosomal 16; RNA, 5S ribosomal 15; RNA, 5S ribosomal 14; RNA, 5S ribosomal 1; RNA, 5S ribosomal 2; RNA, 5S ribosomal 3; RNA, 5S ribosomal 4; RNA, 5S ribosomal 5; RNA, 5S ribosomal 6; RNA, 5S ribosomal 7; RNA, 5S ribosomal 8
8014704	RN5S13	Homo sapiens	RNA, 5S ribosomal 9; RNA, 5S ribosomal 13; RNA, 5S ribosomal 12; RNA, 5S ribosomal 11; RNA, 5S ribosomal 10; RNA, 5S ribosomal 17; RNA, 5S ribosomal 16; RNA, 5S ribosomal 15; RNA, 5S ribosomal 14; RNA, 5S ribosomal 1; RNA, 5S ribosomal 2; RNA, 5S ribosomal 3; RNA, 5S ribosomal 4; RNA, 5S ribosomal 5; RNA, 5S ribosomal 6; RNA, 5S ribosomal 7; RNA, 5S ribosomal 8
8014704	RN5S14	Homo sapiens	RNA, 5S ribosomal 9; RNA, 5S ribosomal 13; RNA, 5S ribosomal 12; RNA, 5S ribosomal 11; RNA, 5S ribosomal 10; RNA, 5S ribosomal 17; RNA, 5S ribosomal 16; RNA, 5S ribosomal 15; RNA, 5S ribosomal 14; RNA, 5S ribosomal 1; RNA, 5S ribosomal 2; RNA, 5S ribosomal 3; RNA, 5S ribosomal 4; RNA, 5S ribosomal 5; RNA, 5S ribosomal 6; RNA, 5S ribosomal 7; RNA, 5S ribosomal 8
8014704	RN5S15	Homo sapiens	RNA, 5S ribosomal 9; RNA, 5S ribosomal 13; RNA, 5S ribosomal 12; RNA, 5S ribosomal 11; RNA, 5S ribosomal 10; RNA, 5S ribosomal 17; RNA, 5S ribosomal 16; RNA, 5S ribosomal 15; RNA, 5S ribosomal 14; RNA, 5S ribosomal 1; RNA, 5S ribosomal 2; RNA, 5S ribosomal 3; RNA, 5S ribosomal 4; RNA, 5S ribosomal 5; RNA, 5S ribosomal 6; RNA, 5S ribosomal 7; RNA, 5S ribosomal 8
8014704	RN5S16	Homo sapiens	RNA, 5S ribosomal 9; RNA, 5S ribosomal 13; RNA, 5S ribosomal 12; RNA, 5S ribosomal 11; RNA, 5S ribosomal 10; RNA, 5S ribosomal 17; RNA, 5S ribosomal 16; RNA, 5S ribosomal 15; RNA, 5S ribosomal 14; RNA, 5S ribosomal 1; RNA, 5S ribosomal 2; RNA, 5S ribosomal 3; RNA, 5S ribosomal 4; RNA, 5S ribosomal 5; RNA, 5S ribosomal 6; RNA, 5S ribosomal 7; RNA, 5S ribosomal 8
8014704	RN5S6	Homo sapiens	RNA, 5S ribosomal 9; RNA, 5S ribosomal 13; RNA, 5S ribosomal 12; RNA, 5S ribosomal 11; RNA, 5S ribosomal 10; RNA, 5S ribosomal 17; RNA, 5S ribosomal 16; RNA, 5S ribosomal 15; RNA, 5S ribosomal 14; RNA, 5S ribosomal 1; RNA, 5S ribosomal 2; RNA, 5S ribosomal 3; RNA, 5S ribosomal 4; RNA, 5S ribosomal 5; RNA, 5S ribosomal 6; RNA, 5S ribosomal 7; RNA, 5S ribosomal 8
8014704	RN5S7	Homo sapiens	RNA, 5S ribosomal 9; RNA, 5S ribosomal 13; RNA, 5S ribosomal 12; RNA, 5S ribosomal 11; RNA, 5S ribosomal 10; RNA, 5S ribosomal 17; RNA, 5S ribosomal 16; RNA, 5S ribosomal 15; RNA, 5S ribosomal 14; RNA, 5S ribosomal 1; RNA, 5S ribosomal 2; RNA, 5S ribosomal 3; RNA, 5S ribosomal 4; RNA, 5S ribosomal 5; RNA, 5S ribosomal 6; RNA, 5S ribosomal 7; RNA, 5S ribosomal 8
8014704	RN5S8	Homo sapiens	RNA, 5S ribosomal 9; RNA, 5S ribosomal 13; RNA, 5S ribosomal 12; RNA, 5S ribosomal 11; RNA, 5S ribosomal 10; RNA, 5S ribosomal 17; RNA, 5S ribosomal 16; RNA, 5S ribosomal 15; RNA, 5S ribosomal 14; RNA, 5S ribosomal 1; RNA, 5S ribosomal 2; RNA, 5S ribosomal 3; RNA, 5S ribosomal 4; RNA, 5S ribosomal 5; RNA, 5S ribosomal 6; RNA, 5S ribosomal 7; RNA, 5S ribosomal 8
8014704	RN5S9	Homo sapiens	RNA, 5S ribosomal 9; RNA, 5S ribosomal 13; RNA, 5S ribosomal 12; RNA, 5S ribosomal 11; RNA, 5S ribosomal 10; RNA, 5S ribosomal 17; RNA, 5S ribosomal 16; RNA, 5S ribosomal 15; RNA, 5S ribosomal 14; RNA, 5S ribosomal 1; RNA, 5S ribosomal 2; RNA, 5S ribosomal 3; RNA, 5S ribosomal 4; RNA, 5S ribosomal 5; RNA, 5S ribosomal 6; RNA, 5S ribosomal 7; RNA, 5S ribosomal 8
8014704	RN5S2	Homo sapiens	RNA, 5S ribosomal 9; RNA, 5S ribosomal 13; RNA, 5S ribosomal 12; RNA, 5S ribosomal 11; RNA, 5S ribosomal 10; RNA, 5S ribosomal 17; RNA, 5S ribosomal 16; RNA, 5S ribosomal 15; RNA, 5S ribosomal 14; RNA, 5S ribosomal 1; RNA, 5S ribosomal 2; RNA, 5S ribosomal 3; RNA, 5S ribosomal 4; RNA, 5S ribosomal 5; RNA, 5S ribosomal 6; RNA, 5S ribosomal 7; RNA, 5S ribosomal 8
8014704	RN5S3	Homo sapiens	RNA, 5S ribosomal 9; RNA, 5S ribosomal 13; RNA, 5S ribosomal 12; RNA, 5S ribosomal 11; RNA, 5S ribosomal 10; RNA, 5S ribosomal 17; RNA, 5S ribosomal 16; RNA, 5S ribosomal 15; RNA, 5S ribosomal 14; RNA, 5S ribosomal 1; RNA, 5S ribosomal 2; RNA, 5S ribosomal 3; RNA, 5S ribosomal 4; RNA, 5S ribosomal 5; RNA, 5S ribosomal 6; RNA, 5S ribosomal 7; RNA, 5S ribosomal 8
8014704	RN5S4	Homo sapiens	RNA, 5S ribosomal 9; RNA, 5S ribosomal 13; RNA, 5S ribosomal 12; RNA, 5S ribosomal 11; RNA, 5S ribosomal 10; RNA, 5S ribosomal 17; RNA, 5S ribosomal 16; RNA, 5S ribosomal 15; RNA, 5S ribosomal 14; RNA, 5S ribosomal 1; RNA, 5S ribosomal 2; RNA, 5S ribosomal 3; RNA, 5S ribosomal 4; RNA, 5S ribosomal 5; RNA, 5S ribosomal 6; RNA, 5S ribosomal 7; RNA, 5S ribosomal 8
8014704	RN5S5	Homo sapiens	RNA, 5S ribosomal 9; RNA, 5S ribosomal 13; RNA, 5S ribosomal 12; RNA, 5S ribosomal 11; RNA, 5S ribosomal 10; RNA, 5S ribosomal 17; RNA, 5S ribosomal 16; RNA, 5S ribosomal 15; RNA, 5S ribosomal 14; RNA, 5S ribosomal 1; RNA, 5S ribosomal 2; RNA, 5S ribosomal 3; RNA, 5S ribosomal 4; RNA, 5S ribosomal 5; RNA, 5S ribosomal 6; RNA, 5S ribosomal 7; RNA, 5S ribosomal 8
8014704	RN5S1	Homo sapiens	RNA, 5S ribosomal 9; RNA, 5S ribosomal 13; RNA, 5S ribosomal 12; RNA, 5S ribosomal 11; RNA, 5S ribosomal 10; RNA, 5S ribosomal 17; RNA, 5S ribosomal 16; RNA, 5S ribosomal 15; RNA, 5S ribosomal 14; RNA, 5S ribosomal 1; RNA, 5S ribosomal 2; RNA, 5S ribosomal 3; RNA, 5S ribosomal 4; RNA, 5S ribosomal 5; RNA, 5S ribosomal 6; RNA, 5S ribosomal 7; RNA, 5S ribosomal 8
8014704	RN5S17	Homo sapiens	RNA, 5S ribosomal 9; RNA, 5S ribosomal 13; RNA, 5S ribosomal 12; RNA, 5S ribosomal 11; RNA, 5S ribosomal 10; RNA, 5S ribosomal 17; RNA, 5S ribosomal 16; RNA, 5S ribosomal 15; RNA, 5S ribosomal 14; RNA, 5S ribosomal 1; RNA, 5S ribosomal 2; RNA, 5S ribosomal 3; RNA, 5S ribosomal 4; RNA, 5S ribosomal 5; RNA, 5S ribosomal 6; RNA, 5S ribosomal 7; RNA, 5S ribosomal 8
7966427	BRAP	Homo sapiens	BRCA1 associated protein
7919886	RNU6-2	Homo sapiens	RNA, U6 small nuclear 2; RNA, U6 small nuclear 1
7919886	RNU6-1	Homo sapiens	RNA, U6 small nuclear 2; RNA, U6 small nuclear 1
7902594	PRKACB	Homo sapiens	protein kinase, cAMP-dependent, catalytic, beta
7895752	SRP14	Homo sapiens	signal recognition particle 14kDa (homologous Alu RNA binding protein) pseudogene 1; signal recognition particle 14kDa (homologous Alu RNA binding protein)
7895752	SRP14P1	Homo sapiens	signal recognition particle 14kDa (homologous Alu RNA binding protein) pseudogene 1; signal recognition particle 14kDa (homologous Alu RNA binding protein)
7894209	dullard	Homo sapiens	dullard homolog (Xenopus laevis)
7916898	Depdc1	Homo sapiens	DEP domain containing 1
7894908	Nars	Homo sapiens	asparaginyl-tRNA synthetase
7894520	SFRS9	Homo sapiens	splicing factor, arginine/serine-rich 9
8135718	Ing3	Homo sapiens	inhibitor of growth family, member 3
8133898	RN5S10	Homo sapiens	RNA, 5S ribosomal 9; RNA, 5S ribosomal 13; RNA, 5S ribosomal 12; RNA, 5S ribosomal 11; RNA, 5S ribosomal 10; RNA, 5S ribosomal 17; RNA, 5S ribosomal 16; RNA, 5S ribosomal 15; RNA, 5S ribosomal 14; RNA, 5S ribosomal 1; RNA, 5S ribosomal 2; RNA, 5S ribosomal 3; RNA, 5S ribosomal 4; RNA, 5S ribosomal 5; RNA, 5S ribosomal 6; RNA, 5S ribosomal 7; RNA, 5S ribosomal 8
8133898	RN5S11	Homo sapiens	RNA, 5S ribosomal 9; RNA, 5S ribosomal 13; RNA, 5S ribosomal 12; RNA, 5S ribosomal 11; RNA, 5S ribosomal 10; RNA, 5S ribosomal 17; RNA, 5S ribosomal 16; RNA, 5S ribosomal 15; RNA, 5S ribosomal 14; RNA, 5S ribosomal 1; RNA, 5S ribosomal 2; RNA, 5S ribosomal 3; RNA, 5S ribosomal 4; RNA, 5S ribosomal 5; RNA, 5S ribosomal 6; RNA, 5S ribosomal 7; RNA, 5S ribosomal 8
8133898	RN5S12	Homo sapiens	RNA, 5S ribosomal 9; RNA, 5S ribosomal 13; RNA, 5S ribosomal 12; RNA, 5S ribosomal 11; RNA, 5S ribosomal 10; RNA, 5S ribosomal 17; RNA, 5S ribosomal 16; RNA, 5S ribosomal 15; RNA, 5S ribosomal 14; RNA, 5S ribosomal 1; RNA, 5S ribosomal 2; RNA, 5S ribosomal 3; RNA, 5S ribosomal 4; RNA, 5S ribosomal 5; RNA, 5S ribosomal 6; RNA, 5S ribosomal 7; RNA, 5S ribosomal 8
8133898	RN5S13	Homo sapiens	RNA, 5S ribosomal 9; RNA, 5S ribosomal 13; RNA, 5S ribosomal 12; RNA, 5S ribosomal 11; RNA, 5S ribosomal 10; RNA, 5S ribosomal 17; RNA, 5S ribosomal 16; RNA, 5S ribosomal 15; RNA, 5S ribosomal 14; RNA, 5S ribosomal 1; RNA, 5S ribosomal 2; RNA, 5S ribosomal 3; RNA, 5S ribosomal 4; RNA, 5S ribosomal 5; RNA, 5S ribosomal 6; RNA, 5S ribosomal 7; RNA, 5S ribosomal 8
8133898	RN5S14	Homo sapiens	RNA, 5S ribosomal 9; RNA, 5S ribosomal 13; RNA, 5S ribosomal 12; RNA, 5S ribosomal 11; RNA, 5S ribosomal 10; RNA, 5S ribosomal 17; RNA, 5S ribosomal 16; RNA, 5S ribosomal 15; RNA, 5S ribosomal 14; RNA, 5S ribosomal 1; RNA, 5S ribosomal 2; RNA, 5S ribosomal 3; RNA, 5S ribosomal 4; RNA, 5S ribosomal 5; RNA, 5S ribosomal 6; RNA, 5S ribosomal 7; RNA, 5S ribosomal 8
8133898	RN5S15	Homo sapiens	RNA, 5S ribosomal 9; RNA, 5S ribosomal 13; RNA, 5S ribosomal 12; RNA, 5S ribosomal 11; RNA, 5S ribosomal 10; RNA, 5S ribosomal 17; RNA, 5S ribosomal 16; RNA, 5S ribosomal 15; RNA, 5S ribosomal 14; RNA, 5S ribosomal 1; RNA, 5S ribosomal 2; RNA, 5S ribosomal 3; RNA, 5S ribosomal 4; RNA, 5S ribosomal 5; RNA, 5S ribosomal 6; RNA, 5S ribosomal 7; RNA, 5S ribosomal 8
8133898	RN5S16	Homo sapiens	RNA, 5S ribosomal 9; RNA, 5S ribosomal 13; RNA, 5S ribosomal 12; RNA, 5S ribosomal 11; RNA, 5S ribosomal 10; RNA, 5S ribosomal 17; RNA, 5S ribosomal 16; RNA, 5S ribosomal 15; RNA, 5S ribosomal 14; RNA, 5S ribosomal 1; RNA, 5S ribosomal 2; RNA, 5S ribosomal 3; RNA, 5S ribosomal 4; RNA, 5S ribosomal 5; RNA, 5S ribosomal 6; RNA, 5S ribosomal 7; RNA, 5S ribosomal 8
8133898	RN5S6	Homo sapiens	RNA, 5S ribosomal 9; RNA, 5S ribosomal 13; RNA, 5S ribosomal 12; RNA, 5S ribosomal 11; RNA, 5S ribosomal 10; RNA, 5S ribosomal 17; RNA, 5S ribosomal 16; RNA, 5S ribosomal 15; RNA, 5S ribosomal 14; RNA, 5S ribosomal 1; RNA, 5S ribosomal 2; RNA, 5S ribosomal 3; RNA, 5S ribosomal 4; RNA, 5S ribosomal 5; RNA, 5S ribosomal 6; RNA, 5S ribosomal 7; RNA, 5S ribosomal 8
8133898	RN5S7	Homo sapiens	RNA, 5S ribosomal 9; RNA, 5S ribosomal 13; RNA, 5S ribosomal 12; RNA, 5S ribosomal 11; RNA, 5S ribosomal 10; RNA, 5S ribosomal 17; RNA, 5S ribosomal 16; RNA, 5S ribosomal 15; RNA, 5S ribosomal 14; RNA, 5S ribosomal 1; RNA, 5S ribosomal 2; RNA, 5S ribosomal 3; RNA, 5S ribosomal 4; RNA, 5S ribosomal 5; RNA, 5S ribosomal 6; RNA, 5S ribosomal 7; RNA, 5S ribosomal 8
8133898	RN5S8	Homo sapiens	RNA, 5S ribosomal 9; RNA, 5S ribosomal 13; RNA, 5S ribosomal 12; RNA, 5S ribosomal 11; RNA, 5S ribosomal 10; RNA, 5S ribosomal 17; RNA, 5S ribosomal 16; RNA, 5S ribosomal 15; RNA, 5S ribosomal 14; RNA, 5S ribosomal 1; RNA, 5S ribosomal 2; RNA, 5S ribosomal 3; RNA, 5S ribosomal 4; RNA, 5S ribosomal 5; RNA, 5S ribosomal 6; RNA, 5S ribosomal 7; RNA, 5S ribosomal 8
8133898	RN5S9	Homo sapiens	RNA, 5S ribosomal 9; RNA, 5S ribosomal 13; RNA, 5S ribosomal 12; RNA, 5S ribosomal 11; RNA, 5S ribosomal 10; RNA, 5S ribosomal 17; RNA, 5S ribosomal 16; RNA, 5S ribosomal 15; RNA, 5S ribosomal 14; RNA, 5S ribosomal 1; RNA, 5S ribosomal 2; RNA, 5S ribosomal 3; RNA, 5S ribosomal 4; RNA, 5S ribosomal 5; RNA, 5S ribosomal 6; RNA, 5S ribosomal 7; RNA, 5S ribosomal 8
8133898	RN5S2	Homo sapiens	RNA, 5S ribosomal 9; RNA, 5S ribosomal 13; RNA, 5S ribosomal 12; RNA, 5S ribosomal 11; RNA, 5S ribosomal 10; RNA, 5S ribosomal 17; RNA, 5S ribosomal 16; RNA, 5S ribosomal 15; RNA, 5S ribosomal 14; RNA, 5S ribosomal 1; RNA, 5S ribosomal 2; RNA, 5S ribosomal 3; RNA, 5S ribosomal 4; RNA, 5S ribosomal 5; RNA, 5S ribosomal 6; RNA, 5S ribosomal 7; RNA, 5S ribosomal 8
8133898	RN5S3	Homo sapiens	RNA, 5S ribosomal 9; RNA, 5S ribosomal 13; RNA, 5S ribosomal 12; RNA, 5S ribosomal 11; RNA, 5S ribosomal 10; RNA, 5S ribosomal 17; RNA, 5S ribosomal 16; RNA, 5S ribosomal 15; RNA, 5S ribosomal 14; RNA, 5S ribosomal 1; RNA, 5S ribosomal 2; RNA, 5S ribosomal 3; RNA, 5S ribosomal 4; RNA, 5S ribosomal 5; RNA, 5S ribosomal 6; RNA, 5S ribosomal 7; RNA, 5S ribosomal 8
8133898	RN5S4	Homo sapiens	RNA, 5S ribosomal 9; RNA, 5S ribosomal 13; RNA, 5S ribosomal 12; RNA, 5S ribosomal 11; RNA, 5S ribosomal 10; RNA, 5S ribosomal 17; RNA, 5S ribosomal 16; RNA, 5S ribosomal 15; RNA, 5S ribosomal 14; RNA, 5S ribosomal 1; RNA, 5S ribosomal 2; RNA, 5S ribosomal 3; RNA, 5S ribosomal 4; RNA, 5S ribosomal 5; RNA, 5S ribosomal 6; RNA, 5S ribosomal 7; RNA, 5S ribosomal 8
8133898	RN5S5	Homo sapiens	RNA, 5S ribosomal 9; RNA, 5S ribosomal 13; RNA, 5S ribosomal 12; RNA, 5S ribosomal 11; RNA, 5S ribosomal 10; RNA, 5S ribosomal 17; RNA, 5S ribosomal 16; RNA, 5S ribosomal 15; RNA, 5S ribosomal 14; RNA, 5S ribosomal 1; RNA, 5S ribosomal 2; RNA, 5S ribosomal 3; RNA, 5S ribosomal 4; RNA, 5S ribosomal 5; RNA, 5S ribosomal 6; RNA, 5S ribosomal 7; RNA, 5S ribosomal 8
8133898	RN5S1	Homo sapiens	RNA, 5S ribosomal 9; RNA, 5S ribosomal 13; RNA, 5S ribosomal 12; RNA, 5S ribosomal 11; RNA, 5S ribosomal 10; RNA, 5S ribosomal 17; RNA, 5S ribosomal 16; RNA, 5S ribosomal 15; RNA, 5S ribosomal 14; RNA, 5S ribosomal 1; RNA, 5S ribosomal 2; RNA, 5S ribosomal 3; RNA, 5S ribosomal 4; RNA, 5S ribosomal 5; RNA, 5S ribosomal 6; RNA, 5S ribosomal 7; RNA, 5S ribosomal 8
8133898	RN5S17	Homo sapiens	RNA, 5S ribosomal 9; RNA, 5S ribosomal 13; RNA, 5S ribosomal 12; RNA, 5S ribosomal 11; RNA, 5S ribosomal 10; RNA, 5S ribosomal 17; RNA, 5S ribosomal 16; RNA, 5S ribosomal 15; RNA, 5S ribosomal 14; RNA, 5S ribosomal 1; RNA, 5S ribosomal 2; RNA, 5S ribosomal 3; RNA, 5S ribosomal 4; RNA, 5S ribosomal 5; RNA, 5S ribosomal 6; RNA, 5S ribosomal 7; RNA, 5S ribosomal 8
8133896	RN18S1	Homo sapiens	18S ribosomal RNA
8174710	RPL39P20	Homo sapiens	ribosomal protein L39 pseudogene 10; ribosomal protein L39 pseudogene 20; ribosomal protein L39 pseudogene 27; ribosomal protein L39; ribosomal protein L39 pseudogene 13; ribosomal protein L39 pseudogene 32
8174710	RPL39P32	Homo sapiens	ribosomal protein L39 pseudogene 10; ribosomal protein L39 pseudogene 20; ribosomal protein L39 pseudogene 27; ribosomal protein L39; ribosomal protein L39 pseudogene 13; ribosomal protein L39 pseudogene 32
8174710	RPL39P13	Homo sapiens	ribosomal protein L39 pseudogene 10; ribosomal protein L39 pseudogene 20; ribosomal protein L39 pseudogene 27; ribosomal protein L39; ribosomal protein L39 pseudogene 13; ribosomal protein L39 pseudogene 32
8174710	RPL39P10	Homo sapiens	ribosomal protein L39 pseudogene 10; ribosomal protein L39 pseudogene 20; ribosomal protein L39 pseudogene 27; ribosomal protein L39; ribosomal protein L39 pseudogene 13; ribosomal protein L39 pseudogene 32
8174710	RPL39P27	Homo sapiens	ribosomal protein L39 pseudogene 10; ribosomal protein L39 pseudogene 20; ribosomal protein L39 pseudogene 27; ribosomal protein L39; ribosomal protein L39 pseudogene 13; ribosomal protein L39 pseudogene 32
8174710	RPL39	Homo sapiens	ribosomal protein L39 pseudogene 10; ribosomal protein L39 pseudogene 20; ribosomal protein L39 pseudogene 27; ribosomal protein L39; ribosomal protein L39 pseudogene 13; ribosomal protein L39 pseudogene 32
8069582	PRSS7	Homo sapiens	protease, serine, 7 (enterokinase)
8105353	SKIV2L2	Homo sapiens	superkiller viralicidic activity 2-like 2 (S. cerevisiae)
7957433	LRRIQ1	Homo sapiens	leucine-rich repeats and IQ motif containing 1
7894214	RPS24	Homo sapiens	ribosomal protein S24
8000537	NPIPL2	Homo sapiens	nuclear pore complex interacting protein-like 2
7892770	snx3	Homo sapiens	sorting nexin 3
7956743	rpl14	Homo sapiens	ribosomal protein L14
8089026	STX19	Homo sapiens	syntaxin 19
8042402	aplf	Homo sapiens	aprataxin and PNKP like factor
7952400	OR8B3	Homo sapiens	olfactory receptor, family 8, subfamily B, member 3
7901967	RN7SL1	Homo sapiens	RNA, 7SL, cytoplasmic 2; RNA, 7SL, cytoplasmic 1
7901967	RN7SL2	Homo sapiens	RNA, 7SL, cytoplasmic 2; RNA, 7SL, cytoplasmic 1
8121911	C6orf173	Homo sapiens	chromosome 6 open reading frame 173
7954419	etnk1	Homo sapiens	ethanolamine kinase 1
8073341	RNY4P7	Homo sapiens	hypothetical LOC100271832; RNA, Ro-associated Y5 pseudogene 10; RNA, Ro-associated Y1; RNA, Ro-associated Y4 pseudogene 7; RNA, Ro-associated Y4 pseudogene 19; RNA, Ro-associated Y3; hypothetical LOC100132111; RNA, Ro-associated Y4
8073341	LOC100271832	Homo sapiens	hypothetical LOC100271832; RNA, Ro-associated Y5 pseudogene 10; RNA, Ro-associated Y1; RNA, Ro-associated Y4 pseudogene 7; RNA, Ro-associated Y4 pseudogene 19; RNA, Ro-associated Y3; hypothetical LOC100132111; RNA, Ro-associated Y4
8073341	RNY5P10	Homo sapiens	hypothetical LOC100271832; RNA, Ro-associated Y5 pseudogene 10; RNA, Ro-associated Y1; RNA, Ro-associated Y4 pseudogene 7; RNA, Ro-associated Y4 pseudogene 19; RNA, Ro-associated Y3; hypothetical LOC100132111; RNA, Ro-associated Y4
8073341	RNY1	Homo sapiens	hypothetical LOC100271832; RNA, Ro-associated Y5 pseudogene 10; RNA, Ro-associated Y1; RNA, Ro-associated Y4 pseudogene 7; RNA, Ro-associated Y4 pseudogene 19; RNA, Ro-associated Y3; hypothetical LOC100132111; RNA, Ro-associated Y4
8073341	LOC100132111	Homo sapiens	hypothetical LOC100271832; RNA, Ro-associated Y5 pseudogene 10; RNA, Ro-associated Y1; RNA, Ro-associated Y4 pseudogene 7; RNA, Ro-associated Y4 pseudogene 19; RNA, Ro-associated Y3; hypothetical LOC100132111; RNA, Ro-associated Y4
8073341	RNY4P19	Homo sapiens	hypothetical LOC100271832; RNA, Ro-associated Y5 pseudogene 10; RNA, Ro-associated Y1; RNA, Ro-associated Y4 pseudogene 7; RNA, Ro-associated Y4 pseudogene 19; RNA, Ro-associated Y3; hypothetical LOC100132111; RNA, Ro-associated Y4
8073341	RNY3	Homo sapiens	hypothetical LOC100271832; RNA, Ro-associated Y5 pseudogene 10; RNA, Ro-associated Y1; RNA, Ro-associated Y4 pseudogene 7; RNA, Ro-associated Y4 pseudogene 19; RNA, Ro-associated Y3; hypothetical LOC100132111; RNA, Ro-associated Y4
8073341	RNY4	Homo sapiens	hypothetical LOC100271832; RNA, Ro-associated Y5 pseudogene 10; RNA, Ro-associated Y1; RNA, Ro-associated Y4 pseudogene 7; RNA, Ro-associated Y4 pseudogene 19; RNA, Ro-associated Y3; hypothetical LOC100132111; RNA, Ro-associated Y4
8139727	2014-09-14	Homo sapiens	septin 14
8161384	CCDC29	Homo sapiens	coiled-coil domain containing 29
7946201	ARFIP2	Homo sapiens	ADP-ribosylation factor interacting protein 2
8161388	C21orf81	Homo sapiens	hCG2042718; chromosome 21 open reading frame 81; ankyrin repeat domain 20 family, member A1; ankyrin repeat domain 20 family, member A3; ankyrin repeat domain 20 family, member A2
8161388	ANKRD20A1	Homo sapiens	hCG2042718; chromosome 21 open reading frame 81; ankyrin repeat domain 20 family, member A1; ankyrin repeat domain 20 family, member A3; ankyrin repeat domain 20 family, member A2
8161388	ANKRD20A2	Homo sapiens	hCG2042718; chromosome 21 open reading frame 81; ankyrin repeat domain 20 family, member A1; ankyrin repeat domain 20 family, member A3; ankyrin repeat domain 20 family, member A2
8161388	ANKRD20A3	Homo sapiens	hCG2042718; chromosome 21 open reading frame 81; ankyrin repeat domain 20 family, member A1; ankyrin repeat domain 20 family, member A3; ankyrin repeat domain 20 family, member A2
8161388	LOC642204	Homo sapiens	hCG2042718; chromosome 21 open reading frame 81; ankyrin repeat domain 20 family, member A1; ankyrin repeat domain 20 family, member A3; ankyrin repeat domain 20 family, member A2
8113023	TMEM161B	Homo sapiens	transmembrane protein 161B
8151935	RpL30	Homo sapiens	ribosomal protein L30
7974335	RN5S10	Homo sapiens	RNA, 5S ribosomal 9; RNA, 5S ribosomal 13; RNA, 5S ribosomal 12; RNA, 5S ribosomal 11; RNA, 5S ribosomal 10; RNA, 5S ribosomal 17; RNA, 5S ribosomal 16; RNA, 5S ribosomal 15; RNA, 5S ribosomal 14; RNA, 5S ribosomal 1; RNA, 5S ribosomal 2; RNA, 5S ribosomal 3; RNA, 5S ribosomal 4; RNA, 5S ribosomal 5; RNA, 5S ribosomal 6; RNA, 5S ribosomal 7; RNA, 5S ribosomal 8
7974335	RN5S11	Homo sapiens	RNA, 5S ribosomal 9; RNA, 5S ribosomal 13; RNA, 5S ribosomal 12; RNA, 5S ribosomal 11; RNA, 5S ribosomal 10; RNA, 5S ribosomal 17; RNA, 5S ribosomal 16; RNA, 5S ribosomal 15; RNA, 5S ribosomal 14; RNA, 5S ribosomal 1; RNA, 5S ribosomal 2; RNA, 5S ribosomal 3; RNA, 5S ribosomal 4; RNA, 5S ribosomal 5; RNA, 5S ribosomal 6; RNA, 5S ribosomal 7; RNA, 5S ribosomal 8
7974335	RN5S12	Homo sapiens	RNA, 5S ribosomal 9; RNA, 5S ribosomal 13; RNA, 5S ribosomal 12; RNA, 5S ribosomal 11; RNA, 5S ribosomal 10; RNA, 5S ribosomal 17; RNA, 5S ribosomal 16; RNA, 5S ribosomal 15; RNA, 5S ribosomal 14; RNA, 5S ribosomal 1; RNA, 5S ribosomal 2; RNA, 5S ribosomal 3; RNA, 5S ribosomal 4; RNA, 5S ribosomal 5; RNA, 5S ribosomal 6; RNA, 5S ribosomal 7; RNA, 5S ribosomal 8
7974335	RN5S13	Homo sapiens	RNA, 5S ribosomal 9; RNA, 5S ribosomal 13; RNA, 5S ribosomal 12; RNA, 5S ribosomal 11; RNA, 5S ribosomal 10; RNA, 5S ribosomal 17; RNA, 5S ribosomal 16; RNA, 5S ribosomal 15; RNA, 5S ribosomal 14; RNA, 5S ribosomal 1; RNA, 5S ribosomal 2; RNA, 5S ribosomal 3; RNA, 5S ribosomal 4; RNA, 5S ribosomal 5; RNA, 5S ribosomal 6; RNA, 5S ribosomal 7; RNA, 5S ribosomal 8
7974335	RN5S14	Homo sapiens	RNA, 5S ribosomal 9; RNA, 5S ribosomal 13; RNA, 5S ribosomal 12; RNA, 5S ribosomal 11; RNA, 5S ribosomal 10; RNA, 5S ribosomal 17; RNA, 5S ribosomal 16; RNA, 5S ribosomal 15; RNA, 5S ribosomal 14; RNA, 5S ribosomal 1; RNA, 5S ribosomal 2; RNA, 5S ribosomal 3; RNA, 5S ribosomal 4; RNA, 5S ribosomal 5; RNA, 5S ribosomal 6; RNA, 5S ribosomal 7; RNA, 5S ribosomal 8
7974335	RN5S15	Homo sapiens	RNA, 5S ribosomal 9; RNA, 5S ribosomal 13; RNA, 5S ribosomal 12; RNA, 5S ribosomal 11; RNA, 5S ribosomal 10; RNA, 5S ribosomal 17; RNA, 5S ribosomal 16; RNA, 5S ribosomal 15; RNA, 5S ribosomal 14; RNA, 5S ribosomal 1; RNA, 5S ribosomal 2; RNA, 5S ribosomal 3; RNA, 5S ribosomal 4; RNA, 5S ribosomal 5; RNA, 5S ribosomal 6; RNA, 5S ribosomal 7; RNA, 5S ribosomal 8
7974335	RN5S16	Homo sapiens	RNA, 5S ribosomal 9; RNA, 5S ribosomal 13; RNA, 5S ribosomal 12; RNA, 5S ribosomal 11; RNA, 5S ribosomal 10; RNA, 5S ribosomal 17; RNA, 5S ribosomal 16; RNA, 5S ribosomal 15; RNA, 5S ribosomal 14; RNA, 5S ribosomal 1; RNA, 5S ribosomal 2; RNA, 5S ribosomal 3; RNA, 5S ribosomal 4; RNA, 5S ribosomal 5; RNA, 5S ribosomal 6; RNA, 5S ribosomal 7; RNA, 5S ribosomal 8
7974335	RN5S6	Homo sapiens	RNA, 5S ribosomal 9; RNA, 5S ribosomal 13; RNA, 5S ribosomal 12; RNA, 5S ribosomal 11; RNA, 5S ribosomal 10; RNA, 5S ribosomal 17; RNA, 5S ribosomal 16; RNA, 5S ribosomal 15; RNA, 5S ribosomal 14; RNA, 5S ribosomal 1; RNA, 5S ribosomal 2; RNA, 5S ribosomal 3; RNA, 5S ribosomal 4; RNA, 5S ribosomal 5; RNA, 5S ribosomal 6; RNA, 5S ribosomal 7; RNA, 5S ribosomal 8
7974335	RN5S7	Homo sapiens	RNA, 5S ribosomal 9; RNA, 5S ribosomal 13; RNA, 5S ribosomal 12; RNA, 5S ribosomal 11; RNA, 5S ribosomal 10; RNA, 5S ribosomal 17; RNA, 5S ribosomal 16; RNA, 5S ribosomal 15; RNA, 5S ribosomal 14; RNA, 5S ribosomal 1; RNA, 5S ribosomal 2; RNA, 5S ribosomal 3; RNA, 5S ribosomal 4; RNA, 5S ribosomal 5; RNA, 5S ribosomal 6; RNA, 5S ribosomal 7; RNA, 5S ribosomal 8
7974335	RN5S8	Homo sapiens	RNA, 5S ribosomal 9; RNA, 5S ribosomal 13; RNA, 5S ribosomal 12; RNA, 5S ribosomal 11; RNA, 5S ribosomal 10; RNA, 5S ribosomal 17; RNA, 5S ribosomal 16; RNA, 5S ribosomal 15; RNA, 5S ribosomal 14; RNA, 5S ribosomal 1; RNA, 5S ribosomal 2; RNA, 5S ribosomal 3; RNA, 5S ribosomal 4; RNA, 5S ribosomal 5; RNA, 5S ribosomal 6; RNA, 5S ribosomal 7; RNA, 5S ribosomal 8
7974335	RN5S9	Homo sapiens	RNA, 5S ribosomal 9; RNA, 5S ribosomal 13; RNA, 5S ribosomal 12; RNA, 5S ribosomal 11; RNA, 5S ribosomal 10; RNA, 5S ribosomal 17; RNA, 5S ribosomal 16; RNA, 5S ribosomal 15; RNA, 5S ribosomal 14; RNA, 5S ribosomal 1; RNA, 5S ribosomal 2; RNA, 5S ribosomal 3; RNA, 5S ribosomal 4; RNA, 5S ribosomal 5; RNA, 5S ribosomal 6; RNA, 5S ribosomal 7; RNA, 5S ribosomal 8
7974335	RN5S2	Homo sapiens	RNA, 5S ribosomal 9; RNA, 5S ribosomal 13; RNA, 5S ribosomal 12; RNA, 5S ribosomal 11; RNA, 5S ribosomal 10; RNA, 5S ribosomal 17; RNA, 5S ribosomal 16; RNA, 5S ribosomal 15; RNA, 5S ribosomal 14; RNA, 5S ribosomal 1; RNA, 5S ribosomal 2; RNA, 5S ribosomal 3; RNA, 5S ribosomal 4; RNA, 5S ribosomal 5; RNA, 5S ribosomal 6; RNA, 5S ribosomal 7; RNA, 5S ribosomal 8
7974335	RN5S3	Homo sapiens	RNA, 5S ribosomal 9; RNA, 5S ribosomal 13; RNA, 5S ribosomal 12; RNA, 5S ribosomal 11; RNA, 5S ribosomal 10; RNA, 5S ribosomal 17; RNA, 5S ribosomal 16; RNA, 5S ribosomal 15; RNA, 5S ribosomal 14; RNA, 5S ribosomal 1; RNA, 5S ribosomal 2; RNA, 5S ribosomal 3; RNA, 5S ribosomal 4; RNA, 5S ribosomal 5; RNA, 5S ribosomal 6; RNA, 5S ribosomal 7; RNA, 5S ribosomal 8
7974335	RN5S4	Homo sapiens	RNA, 5S ribosomal 9; RNA, 5S ribosomal 13; RNA, 5S ribosomal 12; RNA, 5S ribosomal 11; RNA, 5S ribosomal 10; RNA, 5S ribosomal 17; RNA, 5S ribosomal 16; RNA, 5S ribosomal 15; RNA, 5S ribosomal 14; RNA, 5S ribosomal 1; RNA, 5S ribosomal 2; RNA, 5S ribosomal 3; RNA, 5S ribosomal 4; RNA, 5S ribosomal 5; RNA, 5S ribosomal 6; RNA, 5S ribosomal 7; RNA, 5S ribosomal 8
7974335	RN5S5	Homo sapiens	RNA, 5S ribosomal 9; RNA, 5S ribosomal 13; RNA, 5S ribosomal 12; RNA, 5S ribosomal 11; RNA, 5S ribosomal 10; RNA, 5S ribosomal 17; RNA, 5S ribosomal 16; RNA, 5S ribosomal 15; RNA, 5S ribosomal 14; RNA, 5S ribosomal 1; RNA, 5S ribosomal 2; RNA, 5S ribosomal 3; RNA, 5S ribosomal 4; RNA, 5S ribosomal 5; RNA, 5S ribosomal 6; RNA, 5S ribosomal 7; RNA, 5S ribosomal 8
7974335	RN5S1	Homo sapiens	RNA, 5S ribosomal 9; RNA, 5S ribosomal 13; RNA, 5S ribosomal 12; RNA, 5S ribosomal 11; RNA, 5S ribosomal 10; RNA, 5S ribosomal 17; RNA, 5S ribosomal 16; RNA, 5S ribosomal 15; RNA, 5S ribosomal 14; RNA, 5S ribosomal 1; RNA, 5S ribosomal 2; RNA, 5S ribosomal 3; RNA, 5S ribosomal 4; RNA, 5S ribosomal 5; RNA, 5S ribosomal 6; RNA, 5S ribosomal 7; RNA, 5S ribosomal 8
7974335	RN5S17	Homo sapiens	RNA, 5S ribosomal 9; RNA, 5S ribosomal 13; RNA, 5S ribosomal 12; RNA, 5S ribosomal 11; RNA, 5S ribosomal 10; RNA, 5S ribosomal 17; RNA, 5S ribosomal 16; RNA, 5S ribosomal 15; RNA, 5S ribosomal 14; RNA, 5S ribosomal 1; RNA, 5S ribosomal 2; RNA, 5S ribosomal 3; RNA, 5S ribosomal 4; RNA, 5S ribosomal 5; RNA, 5S ribosomal 6; RNA, 5S ribosomal 7; RNA, 5S ribosomal 8
7940259	Ms4a7	Homo sapiens	membrane-spanning 4-domains, subfamily A, member 7
8014142	RNY4P7	Homo sapiens	hypothetical LOC100271832; RNA, Ro-associated Y5 pseudogene 10; RNA, Ro-associated Y1; RNA, Ro-associated Y4 pseudogene 7; RNA, Ro-associated Y4 pseudogene 19; RNA, Ro-associated Y3; hypothetical LOC100132111; RNA, Ro-associated Y4
8014142	LOC100271832	Homo sapiens	hypothetical LOC100271832; RNA, Ro-associated Y5 pseudogene 10; RNA, Ro-associated Y1; RNA, Ro-associated Y4 pseudogene 7; RNA, Ro-associated Y4 pseudogene 19; RNA, Ro-associated Y3; hypothetical LOC100132111; RNA, Ro-associated Y4
8014142	RNY5P10	Homo sapiens	hypothetical LOC100271832; RNA, Ro-associated Y5 pseudogene 10; RNA, Ro-associated Y1; RNA, Ro-associated Y4 pseudogene 7; RNA, Ro-associated Y4 pseudogene 19; RNA, Ro-associated Y3; hypothetical LOC100132111; RNA, Ro-associated Y4
8014142	RNY1	Homo sapiens	hypothetical LOC100271832; RNA, Ro-associated Y5 pseudogene 10; RNA, Ro-associated Y1; RNA, Ro-associated Y4 pseudogene 7; RNA, Ro-associated Y4 pseudogene 19; RNA, Ro-associated Y3; hypothetical LOC100132111; RNA, Ro-associated Y4
8014142	LOC100132111	Homo sapiens	hypothetical LOC100271832; RNA, Ro-associated Y5 pseudogene 10; RNA, Ro-associated Y1; RNA, Ro-associated Y4 pseudogene 7; RNA, Ro-associated Y4 pseudogene 19; RNA, Ro-associated Y3; hypothetical LOC100132111; RNA, Ro-associated Y4
8014142	RNY4P19	Homo sapiens	hypothetical LOC100271832; RNA, Ro-associated Y5 pseudogene 10; RNA, Ro-associated Y1; RNA, Ro-associated Y4 pseudogene 7; RNA, Ro-associated Y4 pseudogene 19; RNA, Ro-associated Y3; hypothetical LOC100132111; RNA, Ro-associated Y4
8014142	RNY3	Homo sapiens	hypothetical LOC100271832; RNA, Ro-associated Y5 pseudogene 10; RNA, Ro-associated Y1; RNA, Ro-associated Y4 pseudogene 7; RNA, Ro-associated Y4 pseudogene 19; RNA, Ro-associated Y3; hypothetical LOC100132111; RNA, Ro-associated Y4
8014142	RNY4	Homo sapiens	hypothetical LOC100271832; RNA, Ro-associated Y5 pseudogene 10; RNA, Ro-associated Y1; RNA, Ro-associated Y4 pseudogene 7; RNA, Ro-associated Y4 pseudogene 19; RNA, Ro-associated Y3; hypothetical LOC100132111; RNA, Ro-associated Y4
8133876	CD36	Homo sapiens	CD36 molecule (thrombospondin receptor)
8081546	RNY4P7	Homo sapiens	hypothetical LOC100271832; RNA, Ro-associated Y5 pseudogene 10; RNA, Ro-associated Y1; RNA, Ro-associated Y4 pseudogene 7; RNA, Ro-associated Y4 pseudogene 19; RNA, Ro-associated Y3; hypothetical LOC100132111; RNA, Ro-associated Y4
8081546	LOC100271832	Homo sapiens	hypothetical LOC100271832; RNA, Ro-associated Y5 pseudogene 10; RNA, Ro-associated Y1; RNA, Ro-associated Y4 pseudogene 7; RNA, Ro-associated Y4 pseudogene 19; RNA, Ro-associated Y3; hypothetical LOC100132111; RNA, Ro-associated Y4
8081546	RNY5P10	Homo sapiens	hypothetical LOC100271832; RNA, Ro-associated Y5 pseudogene 10; RNA, Ro-associated Y1; RNA, Ro-associated Y4 pseudogene 7; RNA, Ro-associated Y4 pseudogene 19; RNA, Ro-associated Y3; hypothetical LOC100132111; RNA, Ro-associated Y4
8081546	RNY1	Homo sapiens	hypothetical LOC100271832; RNA, Ro-associated Y5 pseudogene 10; RNA, Ro-associated Y1; RNA, Ro-associated Y4 pseudogene 7; RNA, Ro-associated Y4 pseudogene 19; RNA, Ro-associated Y3; hypothetical LOC100132111; RNA, Ro-associated Y4
8081546	LOC100132111	Homo sapiens	hypothetical LOC100271832; RNA, Ro-associated Y5 pseudogene 10; RNA, Ro-associated Y1; RNA, Ro-associated Y4 pseudogene 7; RNA, Ro-associated Y4 pseudogene 19; RNA, Ro-associated Y3; hypothetical LOC100132111; RNA, Ro-associated Y4
8081546	RNY4P19	Homo sapiens	hypothetical LOC100271832; RNA, Ro-associated Y5 pseudogene 10; RNA, Ro-associated Y1; RNA, Ro-associated Y4 pseudogene 7; RNA, Ro-associated Y4 pseudogene 19; RNA, Ro-associated Y3; hypothetical LOC100132111; RNA, Ro-associated Y4
8081546	RNY3	Homo sapiens	hypothetical LOC100271832; RNA, Ro-associated Y5 pseudogene 10; RNA, Ro-associated Y1; RNA, Ro-associated Y4 pseudogene 7; RNA, Ro-associated Y4 pseudogene 19; RNA, Ro-associated Y3; hypothetical LOC100132111; RNA, Ro-associated Y4
8081546	RNY4	Homo sapiens	hypothetical LOC100271832; RNA, Ro-associated Y5 pseudogene 10; RNA, Ro-associated Y1; RNA, Ro-associated Y4 pseudogene 7; RNA, Ro-associated Y4 pseudogene 19; RNA, Ro-associated Y3; hypothetical LOC100132111; RNA, Ro-associated Y4
7893439	hnrnpm	Homo sapiens	heterogeneous nuclear ribonucleoprotein M
7894238	KARS	Homo sapiens	lysyl-tRNA synthetase
8112894	RNU6-2	Homo sapiens	RNA, U6 small nuclear 2; RNA, U6 small nuclear 1
8112894	RNU6-1	Homo sapiens	RNA, U6 small nuclear 2; RNA, U6 small nuclear 1
8106730	Xrcc4	Homo sapiens	X-ray repair complementing defective repair in Chinese hamster cells 4
8178841	TAP2	Homo sapiens	transporter 2, ATP-binding cassette, sub-family B (MDR/TAP)
8102998	Gypa	Homo sapiens	glycophorin A (MNS blood group)
7982358	ARHGAP11B	Homo sapiens	Rho GTPase activating protein 11B; Rho GTPase activating protein 11A
7982358	ARHGAP11A	Homo sapiens	Rho GTPase activating protein 11B; Rho GTPase activating protein 11A
8089000	CGGBP1	Homo sapiens	CGG triplet repeat binding protein 1
8121936	C6orf58	Homo sapiens	chromosome 6 open reading frame 58
8025450	OR2Z1	Homo sapiens	olfactory receptor, family 2, subfamily Z, member 1
7893427	Pfn3	Homo sapiens	profilin 3
8121002	C6orf162	Homo sapiens	chromosome 6 open reading frame 162
7892762	EIF4G2	Homo sapiens	eukaryotic translation initiation factor 4 gamma, 2
7893424	Rhoa	Homo sapiens	ras homolog gene family, member A
7892766	taf10	Homo sapiens	TAF10 RNA polymerase II, TATA box binding protein (TBP)-associated factor, 30kDa
7893422	EIF4G2	Homo sapiens	eukaryotic translation initiation factor 4 gamma, 2
8161362	KGFLP1	Homo sapiens	keratinocyte growth factor-like protein 1
8102171	TBCK	Homo sapiens	TBC domain-containing protein kinase-like
7957478	TMTC3	Homo sapiens	transmembrane and tetratricopeptide repeat containing 3
7997489	rn7sk	Homo sapiens	RNA, 7SK small nuclear
8089011	proS1	Homo sapiens	protein S (alpha)
7901931	EFCAB7	Homo sapiens	EF-hand calcium binding domain 7
7893419	ilf2	Homo sapiens	interleukin enhancer binding factor 2, 45kDa
7942912	RNU6-2	Homo sapiens	RNA, U6 small nuclear 2; RNA, U6 small nuclear 1
7942912	RNU6-1	Homo sapiens	RNA, U6 small nuclear 2; RNA, U6 small nuclear 1
8081959	STXBP5L	Homo sapiens	syntaxin binding protein 5-like
8156599	RN5S10	Homo sapiens	RNA, 5S ribosomal 9; RNA, 5S ribosomal 13; RNA, 5S ribosomal 12; RNA, 5S ribosomal 11; RNA, 5S ribosomal 10; RNA, 5S ribosomal 17; RNA, 5S ribosomal 16; RNA, 5S ribosomal 15; RNA, 5S ribosomal 14; RNA, 5S ribosomal 1; RNA, 5S ribosomal 2; RNA, 5S ribosomal 3; RNA, 5S ribosomal 4; RNA, 5S ribosomal 5; RNA, 5S ribosomal 6; RNA, 5S ribosomal 7; RNA, 5S ribosomal 8
8156599	RN5S11	Homo sapiens	RNA, 5S ribosomal 9; RNA, 5S ribosomal 13; RNA, 5S ribosomal 12; RNA, 5S ribosomal 11; RNA, 5S ribosomal 10; RNA, 5S ribosomal 17; RNA, 5S ribosomal 16; RNA, 5S ribosomal 15; RNA, 5S ribosomal 14; RNA, 5S ribosomal 1; RNA, 5S ribosomal 2; RNA, 5S ribosomal 3; RNA, 5S ribosomal 4; RNA, 5S ribosomal 5; RNA, 5S ribosomal 6; RNA, 5S ribosomal 7; RNA, 5S ribosomal 8
8156599	RN5S12	Homo sapiens	RNA, 5S ribosomal 9; RNA, 5S ribosomal 13; RNA, 5S ribosomal 12; RNA, 5S ribosomal 11; RNA, 5S ribosomal 10; RNA, 5S ribosomal 17; RNA, 5S ribosomal 16; RNA, 5S ribosomal 15; RNA, 5S ribosomal 14; RNA, 5S ribosomal 1; RNA, 5S ribosomal 2; RNA, 5S ribosomal 3; RNA, 5S ribosomal 4; RNA, 5S ribosomal 5; RNA, 5S ribosomal 6; RNA, 5S ribosomal 7; RNA, 5S ribosomal 8
8156599	RN5S13	Homo sapiens	RNA, 5S ribosomal 9; RNA, 5S ribosomal 13; RNA, 5S ribosomal 12; RNA, 5S ribosomal 11; RNA, 5S ribosomal 10; RNA, 5S ribosomal 17; RNA, 5S ribosomal 16; RNA, 5S ribosomal 15; RNA, 5S ribosomal 14; RNA, 5S ribosomal 1; RNA, 5S ribosomal 2; RNA, 5S ribosomal 3; RNA, 5S ribosomal 4; RNA, 5S ribosomal 5; RNA, 5S ribosomal 6; RNA, 5S ribosomal 7; RNA, 5S ribosomal 8
8156599	RN5S14	Homo sapiens	RNA, 5S ribosomal 9; RNA, 5S ribosomal 13; RNA, 5S ribosomal 12; RNA, 5S ribosomal 11; RNA, 5S ribosomal 10; RNA, 5S ribosomal 17; RNA, 5S ribosomal 16; RNA, 5S ribosomal 15; RNA, 5S ribosomal 14; RNA, 5S ribosomal 1; RNA, 5S ribosomal 2; RNA, 5S ribosomal 3; RNA, 5S ribosomal 4; RNA, 5S ribosomal 5; RNA, 5S ribosomal 6; RNA, 5S ribosomal 7; RNA, 5S ribosomal 8
8156599	RN5S15	Homo sapiens	RNA, 5S ribosomal 9; RNA, 5S ribosomal 13; RNA, 5S ribosomal 12; RNA, 5S ribosomal 11; RNA, 5S ribosomal 10; RNA, 5S ribosomal 17; RNA, 5S ribosomal 16; RNA, 5S ribosomal 15; RNA, 5S ribosomal 14; RNA, 5S ribosomal 1; RNA, 5S ribosomal 2; RNA, 5S ribosomal 3; RNA, 5S ribosomal 4; RNA, 5S ribosomal 5; RNA, 5S ribosomal 6; RNA, 5S ribosomal 7; RNA, 5S ribosomal 8
8156599	RN5S16	Homo sapiens	RNA, 5S ribosomal 9; RNA, 5S ribosomal 13; RNA, 5S ribosomal 12; RNA, 5S ribosomal 11; RNA, 5S ribosomal 10; RNA, 5S ribosomal 17; RNA, 5S ribosomal 16; RNA, 5S ribosomal 15; RNA, 5S ribosomal 14; RNA, 5S ribosomal 1; RNA, 5S ribosomal 2; RNA, 5S ribosomal 3; RNA, 5S ribosomal 4; RNA, 5S ribosomal 5; RNA, 5S ribosomal 6; RNA, 5S ribosomal 7; RNA, 5S ribosomal 8
8156599	RN5S6	Homo sapiens	RNA, 5S ribosomal 9; RNA, 5S ribosomal 13; RNA, 5S ribosomal 12; RNA, 5S ribosomal 11; RNA, 5S ribosomal 10; RNA, 5S ribosomal 17; RNA, 5S ribosomal 16; RNA, 5S ribosomal 15; RNA, 5S ribosomal 14; RNA, 5S ribosomal 1; RNA, 5S ribosomal 2; RNA, 5S ribosomal 3; RNA, 5S ribosomal 4; RNA, 5S ribosomal 5; RNA, 5S ribosomal 6; RNA, 5S ribosomal 7; RNA, 5S ribosomal 8
8156599	RN5S7	Homo sapiens	RNA, 5S ribosomal 9; RNA, 5S ribosomal 13; RNA, 5S ribosomal 12; RNA, 5S ribosomal 11; RNA, 5S ribosomal 10; RNA, 5S ribosomal 17; RNA, 5S ribosomal 16; RNA, 5S ribosomal 15; RNA, 5S ribosomal 14; RNA, 5S ribosomal 1; RNA, 5S ribosomal 2; RNA, 5S ribosomal 3; RNA, 5S ribosomal 4; RNA, 5S ribosomal 5; RNA, 5S ribosomal 6; RNA, 5S ribosomal 7; RNA, 5S ribosomal 8
8156599	RN5S8	Homo sapiens	RNA, 5S ribosomal 9; RNA, 5S ribosomal 13; RNA, 5S ribosomal 12; RNA, 5S ribosomal 11; RNA, 5S ribosomal 10; RNA, 5S ribosomal 17; RNA, 5S ribosomal 16; RNA, 5S ribosomal 15; RNA, 5S ribosomal 14; RNA, 5S ribosomal 1; RNA, 5S ribosomal 2; RNA, 5S ribosomal 3; RNA, 5S ribosomal 4; RNA, 5S ribosomal 5; RNA, 5S ribosomal 6; RNA, 5S ribosomal 7; RNA, 5S ribosomal 8
8156599	RN5S9	Homo sapiens	RNA, 5S ribosomal 9; RNA, 5S ribosomal 13; RNA, 5S ribosomal 12; RNA, 5S ribosomal 11; RNA, 5S ribosomal 10; RNA, 5S ribosomal 17; RNA, 5S ribosomal 16; RNA, 5S ribosomal 15; RNA, 5S ribosomal 14; RNA, 5S ribosomal 1; RNA, 5S ribosomal 2; RNA, 5S ribosomal 3; RNA, 5S ribosomal 4; RNA, 5S ribosomal 5; RNA, 5S ribosomal 6; RNA, 5S ribosomal 7; RNA, 5S ribosomal 8
8156599	RN5S2	Homo sapiens	RNA, 5S ribosomal 9; RNA, 5S ribosomal 13; RNA, 5S ribosomal 12; RNA, 5S ribosomal 11; RNA, 5S ribosomal 10; RNA, 5S ribosomal 17; RNA, 5S ribosomal 16; RNA, 5S ribosomal 15; RNA, 5S ribosomal 14; RNA, 5S ribosomal 1; RNA, 5S ribosomal 2; RNA, 5S ribosomal 3; RNA, 5S ribosomal 4; RNA, 5S ribosomal 5; RNA, 5S ribosomal 6; RNA, 5S ribosomal 7; RNA, 5S ribosomal 8
8156599	RN5S3	Homo sapiens	RNA, 5S ribosomal 9; RNA, 5S ribosomal 13; RNA, 5S ribosomal 12; RNA, 5S ribosomal 11; RNA, 5S ribosomal 10; RNA, 5S ribosomal 17; RNA, 5S ribosomal 16; RNA, 5S ribosomal 15; RNA, 5S ribosomal 14; RNA, 5S ribosomal 1; RNA, 5S ribosomal 2; RNA, 5S ribosomal 3; RNA, 5S ribosomal 4; RNA, 5S ribosomal 5; RNA, 5S ribosomal 6; RNA, 5S ribosomal 7; RNA, 5S ribosomal 8
8156599	RN5S4	Homo sapiens	RNA, 5S ribosomal 9; RNA, 5S ribosomal 13; RNA, 5S ribosomal 12; RNA, 5S ribosomal 11; RNA, 5S ribosomal 10; RNA, 5S ribosomal 17; RNA, 5S ribosomal 16; RNA, 5S ribosomal 15; RNA, 5S ribosomal 14; RNA, 5S ribosomal 1; RNA, 5S ribosomal 2; RNA, 5S ribosomal 3; RNA, 5S ribosomal 4; RNA, 5S ribosomal 5; RNA, 5S ribosomal 6; RNA, 5S ribosomal 7; RNA, 5S ribosomal 8
8156599	RN5S5	Homo sapiens	RNA, 5S ribosomal 9; RNA, 5S ribosomal 13; RNA, 5S ribosomal 12; RNA, 5S ribosomal 11; RNA, 5S ribosomal 10; RNA, 5S ribosomal 17; RNA, 5S ribosomal 16; RNA, 5S ribosomal 15; RNA, 5S ribosomal 14; RNA, 5S ribosomal 1; RNA, 5S ribosomal 2; RNA, 5S ribosomal 3; RNA, 5S ribosomal 4; RNA, 5S ribosomal 5; RNA, 5S ribosomal 6; RNA, 5S ribosomal 7; RNA, 5S ribosomal 8
8156599	RN5S1	Homo sapiens	RNA, 5S ribosomal 9; RNA, 5S ribosomal 13; RNA, 5S ribosomal 12; RNA, 5S ribosomal 11; RNA, 5S ribosomal 10; RNA, 5S ribosomal 17; RNA, 5S ribosomal 16; RNA, 5S ribosomal 15; RNA, 5S ribosomal 14; RNA, 5S ribosomal 1; RNA, 5S ribosomal 2; RNA, 5S ribosomal 3; RNA, 5S ribosomal 4; RNA, 5S ribosomal 5; RNA, 5S ribosomal 6; RNA, 5S ribosomal 7; RNA, 5S ribosomal 8
8156599	RN5S17	Homo sapiens	RNA, 5S ribosomal 9; RNA, 5S ribosomal 13; RNA, 5S ribosomal 12; RNA, 5S ribosomal 11; RNA, 5S ribosomal 10; RNA, 5S ribosomal 17; RNA, 5S ribosomal 16; RNA, 5S ribosomal 15; RNA, 5S ribosomal 14; RNA, 5S ribosomal 1; RNA, 5S ribosomal 2; RNA, 5S ribosomal 3; RNA, 5S ribosomal 4; RNA, 5S ribosomal 5; RNA, 5S ribosomal 6; RNA, 5S ribosomal 7; RNA, 5S ribosomal 8
8117714	OR2J3	Homo sapiens	olfactory receptor, family 2, subfamily J, member 3
7955985	OR6C74	Homo sapiens	olfactory receptor, family 6, subfamily C, member 74
7922309	Vamp4	Homo sapiens	vesicle-associated membrane protein 4
8101810	RNU6-2	Homo sapiens	RNA, U6 small nuclear 2; RNA, U6 small nuclear 1
8101810	RNU6-1	Homo sapiens	RNA, U6 small nuclear 2; RNA, U6 small nuclear 1
8125537	HLA-DMA	Homo sapiens	major histocompatibility complex, class II, DM alpha
8047606	NBEAL1	Homo sapiens	neurobeachin-like 1
8171758	SCARNA9L	Homo sapiens	small Cajal body-specific RNA 9-like (retrotransposed); small Cajal body-specific RNA 9
8171758	Scarna9	Homo sapiens	small Cajal body-specific RNA 9-like (retrotransposed); small Cajal body-specific RNA 9
8146914	LOC646127	Homo sapiens	similar to telomeric repeat binding factor (NIMA-interacting) 1; telomeric repeat binding factor (NIMA-interacting) 1; telomeric repeat binding factor (NIMA-interacting) 1 pseudogene
8146914	LOC646316	Homo sapiens	similar to telomeric repeat binding factor (NIMA-interacting) 1; telomeric repeat binding factor (NIMA-interacting) 1; telomeric repeat binding factor (NIMA-interacting) 1 pseudogene
8146914	LOC283523	Homo sapiens	similar to telomeric repeat binding factor (NIMA-interacting) 1; telomeric repeat binding factor (NIMA-interacting) 1; telomeric repeat binding factor (NIMA-interacting) 1 pseudogene
8146914	TERF1	Homo sapiens	similar to telomeric repeat binding factor (NIMA-interacting) 1; telomeric repeat binding factor (NIMA-interacting) 1; telomeric repeat binding factor (NIMA-interacting) 1 pseudogene
8146914	LOC646359	Homo sapiens	similar to telomeric repeat binding factor (NIMA-interacting) 1; telomeric repeat binding factor (NIMA-interacting) 1; telomeric repeat binding factor (NIMA-interacting) 1 pseudogene
7896292	rpl28	Homo sapiens	ribosomal protein L28
7964640	RNU6-2	Homo sapiens	RNA, U6 small nuclear 2; RNA, U6 small nuclear 1
7964640	RNU6-1	Homo sapiens	RNA, U6 small nuclear 2; RNA, U6 small nuclear 1
8156581	c9orf102	Homo sapiens	chromosome 9 open reading frame 102
8117079	prmt5	Pan troglodytes	hypothetical protein LOC740178; protein arginine methyltransferase 5
8117079	LOC740178	Pan troglodytes	hypothetical protein LOC740178; protein arginine methyltransferase 5
8085052	RNU6-2	Homo sapiens	RNA, U6 small nuclear 2; RNA, U6 small nuclear 1
8085052	RNU6-1	Homo sapiens	RNA, U6 small nuclear 2; RNA, U6 small nuclear 1
7894262	oaz1	Homo sapiens	ornithine decarboxylase antizyme 1
8092763	RNU1-5	Homo sapiens	RNA, U1F1 small nuclear; RNA, U1C2 small nuclear; RNA, U1G2 small nuclear; RNA, U1C1 small nuclear; RNA, U1G3 small nuclear; RNA, U1A3 small nuclear; RNA, U1G1 small nuclear; RNA, U1A small nuclear
8092763	RNU1-8	Homo sapiens	RNA, U1F1 small nuclear; RNA, U1C2 small nuclear; RNA, U1G2 small nuclear; RNA, U1C1 small nuclear; RNA, U1G3 small nuclear; RNA, U1A3 small nuclear; RNA, U1G1 small nuclear; RNA, U1A small nuclear
8092763	RNU1-7	Homo sapiens	RNA, U1F1 small nuclear; RNA, U1C2 small nuclear; RNA, U1G2 small nuclear; RNA, U1C1 small nuclear; RNA, U1G3 small nuclear; RNA, U1A3 small nuclear; RNA, U1G1 small nuclear; RNA, U1A small nuclear
8092763	RNU1-9	Homo sapiens	RNA, U1F1 small nuclear; RNA, U1C2 small nuclear; RNA, U1G2 small nuclear; RNA, U1C1 small nuclear; RNA, U1G3 small nuclear; RNA, U1A3 small nuclear; RNA, U1G1 small nuclear; RNA, U1A small nuclear
8092763	RNU1-3	Homo sapiens	RNA, U1F1 small nuclear; RNA, U1C2 small nuclear; RNA, U1G2 small nuclear; RNA, U1C1 small nuclear; RNA, U1G3 small nuclear; RNA, U1A3 small nuclear; RNA, U1G1 small nuclear; RNA, U1A small nuclear
8092763	RNU1-4	Homo sapiens	RNA, U1F1 small nuclear; RNA, U1C2 small nuclear; RNA, U1G2 small nuclear; RNA, U1C1 small nuclear; RNA, U1G3 small nuclear; RNA, U1A3 small nuclear; RNA, U1G1 small nuclear; RNA, U1A small nuclear
8092763	RNU1-1	Homo sapiens	RNA, U1F1 small nuclear; RNA, U1C2 small nuclear; RNA, U1G2 small nuclear; RNA, U1C1 small nuclear; RNA, U1G3 small nuclear; RNA, U1A3 small nuclear; RNA, U1G1 small nuclear; RNA, U1A small nuclear
8092763	RNU1-2	Homo sapiens	RNA, U1F1 small nuclear; RNA, U1C2 small nuclear; RNA, U1G2 small nuclear; RNA, U1C1 small nuclear; RNA, U1G3 small nuclear; RNA, U1A3 small nuclear; RNA, U1G1 small nuclear; RNA, U1A small nuclear
8154305	LOC100133398	Homo sapiens	selenoprotein T; similar to Selenoprotein T
8154305	selt	Homo sapiens	selenoprotein T; similar to Selenoprotein T
7894974	HINT1	Homo sapiens	histidine triad nucleotide binding protein 1
8051812	RNU6-2	Homo sapiens	RNA, U6 small nuclear 2; RNA, U6 small nuclear 1
8051812	RNU6-1	Homo sapiens	RNA, U6 small nuclear 2; RNA, U6 small nuclear 1
8149214	LOC349196	Homo sapiens	hypothetical LOC349196
8033458	LYPLA2P1	Homo sapiens	lysophospholipase II pseudogene 1; lysophospholipase II
8033458	LYPLA2	Homo sapiens	lysophospholipase II pseudogene 1; lysophospholipase II
7930775	RNU6-2	Homo sapiens	RNA, U6 small nuclear 2; RNA, U6 small nuclear 1
7930775	RNU6-1	Homo sapiens	RNA, U6 small nuclear 2; RNA, U6 small nuclear 1
7892704	DAD1	Homo sapiens	defender against cell death 1
7961287	TAS2R19	Homo sapiens	taste receptor, type 2, member 19
8063473	RPL12P6	Homo sapiens	ribosomal protein L12 pseudogene 2; ribosomal protein L12 pseudogene 32; ribosomal protein L12 pseudogene 35; ribosomal protein L12 pseudogene 19; ribosomal protein L12 pseudogene 6; ribosomal protein L12; ribosomal protein L12 pseudogene 14
8063473	RPL12P32	Homo sapiens	ribosomal protein L12 pseudogene 2; ribosomal protein L12 pseudogene 32; ribosomal protein L12 pseudogene 35; ribosomal protein L12 pseudogene 19; ribosomal protein L12 pseudogene 6; ribosomal protein L12; ribosomal protein L12 pseudogene 14
8063473	RPL12P14	Homo sapiens	ribosomal protein L12 pseudogene 2; ribosomal protein L12 pseudogene 32; ribosomal protein L12 pseudogene 35; ribosomal protein L12 pseudogene 19; ribosomal protein L12 pseudogene 6; ribosomal protein L12; ribosomal protein L12 pseudogene 14
8063473	rpl12	Homo sapiens	ribosomal protein L12 pseudogene 2; ribosomal protein L12 pseudogene 32; ribosomal protein L12 pseudogene 35; ribosomal protein L12 pseudogene 19; ribosomal protein L12 pseudogene 6; ribosomal protein L12; ribosomal protein L12 pseudogene 14
8063473	RPL12P2	Homo sapiens	ribosomal protein L12 pseudogene 2; ribosomal protein L12 pseudogene 32; ribosomal protein L12 pseudogene 35; ribosomal protein L12 pseudogene 19; ribosomal protein L12 pseudogene 6; ribosomal protein L12; ribosomal protein L12 pseudogene 14
8063473	RPL12P35	Homo sapiens	ribosomal protein L12 pseudogene 2; ribosomal protein L12 pseudogene 32; ribosomal protein L12 pseudogene 35; ribosomal protein L12 pseudogene 19; ribosomal protein L12 pseudogene 6; ribosomal protein L12; ribosomal protein L12 pseudogene 14
8063473	RPL12P19	Homo sapiens	ribosomal protein L12 pseudogene 2; ribosomal protein L12 pseudogene 32; ribosomal protein L12 pseudogene 35; ribosomal protein L12 pseudogene 19; ribosomal protein L12 pseudogene 6; ribosomal protein L12; ribosomal protein L12 pseudogene 14
8136446	RNU6-2	Homo sapiens	RNA, U6 small nuclear 2; RNA, U6 small nuclear 1
8136446	RNU6-1	Homo sapiens	RNA, U6 small nuclear 2; RNA, U6 small nuclear 1
8137979	ACTB	Homo sapiens	actin, beta
8046346	HAT1	Homo sapiens	histone acetyltransferase 1
7933947	herc4	Homo sapiens	hect domain and RLD 4
8040286	RNU6-2	Homo sapiens	RNA, U6 small nuclear 2; RNA, U6 small nuclear 1
8040286	RNU6-1	Homo sapiens	RNA, U6 small nuclear 2; RNA, U6 small nuclear 1
7894274	GDI2	Homo sapiens	GDP dissociation inhibitor 2
8112855	RNY4P7	Homo sapiens	hypothetical LOC100271832; RNA, Ro-associated Y5 pseudogene 10; RNA, Ro-associated Y1; RNA, Ro-associated Y4 pseudogene 7; RNA, Ro-associated Y4 pseudogene 19; RNA, Ro-associated Y3; hypothetical LOC100132111; RNA, Ro-associated Y4
8112855	LOC100271832	Homo sapiens	hypothetical LOC100271832; RNA, Ro-associated Y5 pseudogene 10; RNA, Ro-associated Y1; RNA, Ro-associated Y4 pseudogene 7; RNA, Ro-associated Y4 pseudogene 19; RNA, Ro-associated Y3; hypothetical LOC100132111; RNA, Ro-associated Y4
8112855	RNY5P10	Homo sapiens	hypothetical LOC100271832; RNA, Ro-associated Y5 pseudogene 10; RNA, Ro-associated Y1; RNA, Ro-associated Y4 pseudogene 7; RNA, Ro-associated Y4 pseudogene 19; RNA, Ro-associated Y3; hypothetical LOC100132111; RNA, Ro-associated Y4
8112855	RNY1	Homo sapiens	hypothetical LOC100271832; RNA, Ro-associated Y5 pseudogene 10; RNA, Ro-associated Y1; RNA, Ro-associated Y4 pseudogene 7; RNA, Ro-associated Y4 pseudogene 19; RNA, Ro-associated Y3; hypothetical LOC100132111; RNA, Ro-associated Y4
8112855	LOC100132111	Homo sapiens	hypothetical LOC100271832; RNA, Ro-associated Y5 pseudogene 10; RNA, Ro-associated Y1; RNA, Ro-associated Y4 pseudogene 7; RNA, Ro-associated Y4 pseudogene 19; RNA, Ro-associated Y3; hypothetical LOC100132111; RNA, Ro-associated Y4
8112855	RNY4P19	Homo sapiens	hypothetical LOC100271832; RNA, Ro-associated Y5 pseudogene 10; RNA, Ro-associated Y1; RNA, Ro-associated Y4 pseudogene 7; RNA, Ro-associated Y4 pseudogene 19; RNA, Ro-associated Y3; hypothetical LOC100132111; RNA, Ro-associated Y4
8112855	RNY3	Homo sapiens	hypothetical LOC100271832; RNA, Ro-associated Y5 pseudogene 10; RNA, Ro-associated Y1; RNA, Ro-associated Y4 pseudogene 7; RNA, Ro-associated Y4 pseudogene 19; RNA, Ro-associated Y3; hypothetical LOC100132111; RNA, Ro-associated Y4
8112855	RNY4	Homo sapiens	hypothetical LOC100271832; RNA, Ro-associated Y5 pseudogene 10; RNA, Ro-associated Y1; RNA, Ro-associated Y4 pseudogene 7; RNA, Ro-associated Y4 pseudogene 19; RNA, Ro-associated Y3; hypothetical LOC100132111; RNA, Ro-associated Y4
7961281	TAS2R50	Homo sapiens	taste receptor, type 2, member 50
8151572	SNX16	Homo sapiens	sorting nexin 16
8077511	SNORA43	Homo sapiens	small nucleolar RNA, H/ACA box 43
7961279	TAS2R14	Homo sapiens	taste receptor, type 2, member 14
7902512	Dnajb4	Homo sapiens	DnaJ (Hsp40) homolog, subfamily B, member 4
8084715	rps20	Homo sapiens	ribosomal protein S20
7987369	ATPBD4	Homo sapiens	ATP binding domain 4
7955993	OR6C75	Homo sapiens	olfactory receptor, family 6, subfamily C, member 75
8178891	hla-dpa1	Homo sapiens	major histocompatibility complex, class II, DP alpha 1
7955997	OR6C76	Homo sapiens	olfactory receptor, family 6, subfamily C, member 76
7943620	LOC651610	Homo sapiens	similar to Serine-protein kinase ATM (Ataxia telangiectasia mutated) (A-T, mutated); ataxia telangiectasia mutated
7943620	ATM	Homo sapiens	similar to Serine-protein kinase ATM (Ataxia telangiectasia mutated) (A-T, mutated); ataxia telangiectasia mutated
8110618	LOC646227	Homo sapiens	cAMP-regulated phosphoprotein 19 pseudogene; cAMP-regulated phosphoprotein, 19kDa
8110618	ARPP19	Homo sapiens	cAMP-regulated phosphoprotein 19 pseudogene; cAMP-regulated phosphoprotein, 19kDa
8110618	LOC643896	Homo sapiens	cAMP-regulated phosphoprotein 19 pseudogene; cAMP-regulated phosphoprotein, 19kDa
7894990	RPS25	Homo sapiens	ribosomal protein S25 pseudogene 8; ribosomal protein S25
7894990	RPS25P8	Homo sapiens	ribosomal protein S25 pseudogene 8; ribosomal protein S25
7955991	OR6C3	Homo sapiens	olfactory receptor, family 6, subfamily C, member 3
7896278	c19orf50	Homo sapiens	chromosome 19 open reading frame 50
7894999	rps11	Homo sapiens	ribosomal protein S11 pseudogene 5; ribosomal protein S11
7894999	RPS11P5	Homo sapiens	ribosomal protein S11 pseudogene 5; ribosomal protein S11
7927874	RNY4P7	Homo sapiens	hypothetical LOC100271832; RNA, Ro-associated Y5 pseudogene 10; RNA, Ro-associated Y1; RNA, Ro-associated Y4 pseudogene 7; RNA, Ro-associated Y4 pseudogene 19; RNA, Ro-associated Y3; hypothetical LOC100132111; RNA, Ro-associated Y4
7927874	LOC100271832	Homo sapiens	hypothetical LOC100271832; RNA, Ro-associated Y5 pseudogene 10; RNA, Ro-associated Y1; RNA, Ro-associated Y4 pseudogene 7; RNA, Ro-associated Y4 pseudogene 19; RNA, Ro-associated Y3; hypothetical LOC100132111; RNA, Ro-associated Y4
7927874	RNY5P10	Homo sapiens	hypothetical LOC100271832; RNA, Ro-associated Y5 pseudogene 10; RNA, Ro-associated Y1; RNA, Ro-associated Y4 pseudogene 7; RNA, Ro-associated Y4 pseudogene 19; RNA, Ro-associated Y3; hypothetical LOC100132111; RNA, Ro-associated Y4
7927874	RNY1	Homo sapiens	hypothetical LOC100271832; RNA, Ro-associated Y5 pseudogene 10; RNA, Ro-associated Y1; RNA, Ro-associated Y4 pseudogene 7; RNA, Ro-associated Y4 pseudogene 19; RNA, Ro-associated Y3; hypothetical LOC100132111; RNA, Ro-associated Y4
7927874	LOC100132111	Homo sapiens	hypothetical LOC100271832; RNA, Ro-associated Y5 pseudogene 10; RNA, Ro-associated Y1; RNA, Ro-associated Y4 pseudogene 7; RNA, Ro-associated Y4 pseudogene 19; RNA, Ro-associated Y3; hypothetical LOC100132111; RNA, Ro-associated Y4
7927874	RNY4P19	Homo sapiens	hypothetical LOC100271832; RNA, Ro-associated Y5 pseudogene 10; RNA, Ro-associated Y1; RNA, Ro-associated Y4 pseudogene 7; RNA, Ro-associated Y4 pseudogene 19; RNA, Ro-associated Y3; hypothetical LOC100132111; RNA, Ro-associated Y4
7927874	RNY3	Homo sapiens	hypothetical LOC100271832; RNA, Ro-associated Y5 pseudogene 10; RNA, Ro-associated Y1; RNA, Ro-associated Y4 pseudogene 7; RNA, Ro-associated Y4 pseudogene 19; RNA, Ro-associated Y3; hypothetical LOC100132111; RNA, Ro-associated Y4
7927874	RNY4	Homo sapiens	hypothetical LOC100271832; RNA, Ro-associated Y5 pseudogene 10; RNA, Ro-associated Y1; RNA, Ro-associated Y4 pseudogene 7; RNA, Ro-associated Y4 pseudogene 19; RNA, Ro-associated Y3; hypothetical LOC100132111; RNA, Ro-associated Y4
8061364	RPL41P1	Homo sapiens	ribosomal protein L41 pseudogene 1
8118974	RPL10AP9	Homo sapiens	ribosomal protein L10a pseudogene 6; ribosomal protein L10a; ribosomal protein L10a pseudogene 9
8118974	RPL10A	Homo sapiens	ribosomal protein L10a pseudogene 6; ribosomal protein L10a; ribosomal protein L10a pseudogene 9
8118974	RPL10AP6	Homo sapiens	ribosomal protein L10a pseudogene 6; ribosomal protein L10a; ribosomal protein L10a pseudogene 9
8118979	SNORA40	Homo sapiens	small nucleolar RNA, H/ACA box 40
7917433	Odf2l	Homo sapiens	outer dense fiber of sperm tails 2-like
7946687	pth	Homo sapiens	parathyroid hormone
8124459	ZNF322A	Homo sapiens	zinc finger protein 322A
8078153	RN7SL1	Homo sapiens	RNA, 7SL, cytoplasmic 2; RNA, 7SL, cytoplasmic 1
8078153	RN7SL2	Homo sapiens	RNA, 7SL, cytoplasmic 2; RNA, 7SL, cytoplasmic 1
7894946	USP22	Homo sapiens	ubiquitin specific peptidase 22
8094876	Guf1	Homo sapiens	GUF1 GTPase homolog (S. cerevisiae)
7923119	Zbtb41	Homo sapiens	zinc finger and BTB domain containing 41
7899502	Rnu11	Homo sapiens	RNA, U11 small nuclear
8081158	arl6	Homo sapiens	ADP-ribosylation factor-like 6
8173607	RN7SL1	Homo sapiens	RNA, 7SL, cytoplasmic 2; RNA, 7SL, cytoplasmic 1
8173607	RN7SL2	Homo sapiens	RNA, 7SL, cytoplasmic 2; RNA, 7SL, cytoplasmic 1
7899909	RN5S10	Homo sapiens	RNA, 5S ribosomal 9; RNA, 5S ribosomal 13; RNA, 5S ribosomal 12; RNA, 5S ribosomal 11; RNA, 5S ribosomal 10; RNA, 5S ribosomal 17; RNA, 5S ribosomal 16; RNA, 5S ribosomal 15; RNA, 5S ribosomal 14; RNA, 5S ribosomal 1; RNA, 5S ribosomal 2; RNA, 5S ribosomal 3; RNA, 5S ribosomal 4; RNA, 5S ribosomal 5; RNA, 5S ribosomal 6; RNA, 5S ribosomal 7; RNA, 5S ribosomal 8
7899909	RN5S11	Homo sapiens	RNA, 5S ribosomal 9; RNA, 5S ribosomal 13; RNA, 5S ribosomal 12; RNA, 5S ribosomal 11; RNA, 5S ribosomal 10; RNA, 5S ribosomal 17; RNA, 5S ribosomal 16; RNA, 5S ribosomal 15; RNA, 5S ribosomal 14; RNA, 5S ribosomal 1; RNA, 5S ribosomal 2; RNA, 5S ribosomal 3; RNA, 5S ribosomal 4; RNA, 5S ribosomal 5; RNA, 5S ribosomal 6; RNA, 5S ribosomal 7; RNA, 5S ribosomal 8
7899909	RN5S12	Homo sapiens	RNA, 5S ribosomal 9; RNA, 5S ribosomal 13; RNA, 5S ribosomal 12; RNA, 5S ribosomal 11; RNA, 5S ribosomal 10; RNA, 5S ribosomal 17; RNA, 5S ribosomal 16; RNA, 5S ribosomal 15; RNA, 5S ribosomal 14; RNA, 5S ribosomal 1; RNA, 5S ribosomal 2; RNA, 5S ribosomal 3; RNA, 5S ribosomal 4; RNA, 5S ribosomal 5; RNA, 5S ribosomal 6; RNA, 5S ribosomal 7; RNA, 5S ribosomal 8
7899909	RN5S13	Homo sapiens	RNA, 5S ribosomal 9; RNA, 5S ribosomal 13; RNA, 5S ribosomal 12; RNA, 5S ribosomal 11; RNA, 5S ribosomal 10; RNA, 5S ribosomal 17; RNA, 5S ribosomal 16; RNA, 5S ribosomal 15; RNA, 5S ribosomal 14; RNA, 5S ribosomal 1; RNA, 5S ribosomal 2; RNA, 5S ribosomal 3; RNA, 5S ribosomal 4; RNA, 5S ribosomal 5; RNA, 5S ribosomal 6; RNA, 5S ribosomal 7; RNA, 5S ribosomal 8
7899909	RN5S14	Homo sapiens	RNA, 5S ribosomal 9; RNA, 5S ribosomal 13; RNA, 5S ribosomal 12; RNA, 5S ribosomal 11; RNA, 5S ribosomal 10; RNA, 5S ribosomal 17; RNA, 5S ribosomal 16; RNA, 5S ribosomal 15; RNA, 5S ribosomal 14; RNA, 5S ribosomal 1; RNA, 5S ribosomal 2; RNA, 5S ribosomal 3; RNA, 5S ribosomal 4; RNA, 5S ribosomal 5; RNA, 5S ribosomal 6; RNA, 5S ribosomal 7; RNA, 5S ribosomal 8
7899909	RN5S15	Homo sapiens	RNA, 5S ribosomal 9; RNA, 5S ribosomal 13; RNA, 5S ribosomal 12; RNA, 5S ribosomal 11; RNA, 5S ribosomal 10; RNA, 5S ribosomal 17; RNA, 5S ribosomal 16; RNA, 5S ribosomal 15; RNA, 5S ribosomal 14; RNA, 5S ribosomal 1; RNA, 5S ribosomal 2; RNA, 5S ribosomal 3; RNA, 5S ribosomal 4; RNA, 5S ribosomal 5; RNA, 5S ribosomal 6; RNA, 5S ribosomal 7; RNA, 5S ribosomal 8
7899909	RN5S16	Homo sapiens	RNA, 5S ribosomal 9; RNA, 5S ribosomal 13; RNA, 5S ribosomal 12; RNA, 5S ribosomal 11; RNA, 5S ribosomal 10; RNA, 5S ribosomal 17; RNA, 5S ribosomal 16; RNA, 5S ribosomal 15; RNA, 5S ribosomal 14; RNA, 5S ribosomal 1; RNA, 5S ribosomal 2; RNA, 5S ribosomal 3; RNA, 5S ribosomal 4; RNA, 5S ribosomal 5; RNA, 5S ribosomal 6; RNA, 5S ribosomal 7; RNA, 5S ribosomal 8
7899909	RN5S6	Homo sapiens	RNA, 5S ribosomal 9; RNA, 5S ribosomal 13; RNA, 5S ribosomal 12; RNA, 5S ribosomal 11; RNA, 5S ribosomal 10; RNA, 5S ribosomal 17; RNA, 5S ribosomal 16; RNA, 5S ribosomal 15; RNA, 5S ribosomal 14; RNA, 5S ribosomal 1; RNA, 5S ribosomal 2; RNA, 5S ribosomal 3; RNA, 5S ribosomal 4; RNA, 5S ribosomal 5; RNA, 5S ribosomal 6; RNA, 5S ribosomal 7; RNA, 5S ribosomal 8
7899909	RN5S7	Homo sapiens	RNA, 5S ribosomal 9; RNA, 5S ribosomal 13; RNA, 5S ribosomal 12; RNA, 5S ribosomal 11; RNA, 5S ribosomal 10; RNA, 5S ribosomal 17; RNA, 5S ribosomal 16; RNA, 5S ribosomal 15; RNA, 5S ribosomal 14; RNA, 5S ribosomal 1; RNA, 5S ribosomal 2; RNA, 5S ribosomal 3; RNA, 5S ribosomal 4; RNA, 5S ribosomal 5; RNA, 5S ribosomal 6; RNA, 5S ribosomal 7; RNA, 5S ribosomal 8
7899909	RN5S8	Homo sapiens	RNA, 5S ribosomal 9; RNA, 5S ribosomal 13; RNA, 5S ribosomal 12; RNA, 5S ribosomal 11; RNA, 5S ribosomal 10; RNA, 5S ribosomal 17; RNA, 5S ribosomal 16; RNA, 5S ribosomal 15; RNA, 5S ribosomal 14; RNA, 5S ribosomal 1; RNA, 5S ribosomal 2; RNA, 5S ribosomal 3; RNA, 5S ribosomal 4; RNA, 5S ribosomal 5; RNA, 5S ribosomal 6; RNA, 5S ribosomal 7; RNA, 5S ribosomal 8
7899909	RN5S9	Homo sapiens	RNA, 5S ribosomal 9; RNA, 5S ribosomal 13; RNA, 5S ribosomal 12; RNA, 5S ribosomal 11; RNA, 5S ribosomal 10; RNA, 5S ribosomal 17; RNA, 5S ribosomal 16; RNA, 5S ribosomal 15; RNA, 5S ribosomal 14; RNA, 5S ribosomal 1; RNA, 5S ribosomal 2; RNA, 5S ribosomal 3; RNA, 5S ribosomal 4; RNA, 5S ribosomal 5; RNA, 5S ribosomal 6; RNA, 5S ribosomal 7; RNA, 5S ribosomal 8
7899909	RN5S2	Homo sapiens	RNA, 5S ribosomal 9; RNA, 5S ribosomal 13; RNA, 5S ribosomal 12; RNA, 5S ribosomal 11; RNA, 5S ribosomal 10; RNA, 5S ribosomal 17; RNA, 5S ribosomal 16; RNA, 5S ribosomal 15; RNA, 5S ribosomal 14; RNA, 5S ribosomal 1; RNA, 5S ribosomal 2; RNA, 5S ribosomal 3; RNA, 5S ribosomal 4; RNA, 5S ribosomal 5; RNA, 5S ribosomal 6; RNA, 5S ribosomal 7; RNA, 5S ribosomal 8
7899909	RN5S3	Homo sapiens	RNA, 5S ribosomal 9; RNA, 5S ribosomal 13; RNA, 5S ribosomal 12; RNA, 5S ribosomal 11; RNA, 5S ribosomal 10; RNA, 5S ribosomal 17; RNA, 5S ribosomal 16; RNA, 5S ribosomal 15; RNA, 5S ribosomal 14; RNA, 5S ribosomal 1; RNA, 5S ribosomal 2; RNA, 5S ribosomal 3; RNA, 5S ribosomal 4; RNA, 5S ribosomal 5; RNA, 5S ribosomal 6; RNA, 5S ribosomal 7; RNA, 5S ribosomal 8
7899909	RN5S4	Homo sapiens	RNA, 5S ribosomal 9; RNA, 5S ribosomal 13; RNA, 5S ribosomal 12; RNA, 5S ribosomal 11; RNA, 5S ribosomal 10; RNA, 5S ribosomal 17; RNA, 5S ribosomal 16; RNA, 5S ribosomal 15; RNA, 5S ribosomal 14; RNA, 5S ribosomal 1; RNA, 5S ribosomal 2; RNA, 5S ribosomal 3; RNA, 5S ribosomal 4; RNA, 5S ribosomal 5; RNA, 5S ribosomal 6; RNA, 5S ribosomal 7; RNA, 5S ribosomal 8
7899909	RN5S5	Homo sapiens	RNA, 5S ribosomal 9; RNA, 5S ribosomal 13; RNA, 5S ribosomal 12; RNA, 5S ribosomal 11; RNA, 5S ribosomal 10; RNA, 5S ribosomal 17; RNA, 5S ribosomal 16; RNA, 5S ribosomal 15; RNA, 5S ribosomal 14; RNA, 5S ribosomal 1; RNA, 5S ribosomal 2; RNA, 5S ribosomal 3; RNA, 5S ribosomal 4; RNA, 5S ribosomal 5; RNA, 5S ribosomal 6; RNA, 5S ribosomal 7; RNA, 5S ribosomal 8
7899909	RN5S1	Homo sapiens	RNA, 5S ribosomal 9; RNA, 5S ribosomal 13; RNA, 5S ribosomal 12; RNA, 5S ribosomal 11; RNA, 5S ribosomal 10; RNA, 5S ribosomal 17; RNA, 5S ribosomal 16; RNA, 5S ribosomal 15; RNA, 5S ribosomal 14; RNA, 5S ribosomal 1; RNA, 5S ribosomal 2; RNA, 5S ribosomal 3; RNA, 5S ribosomal 4; RNA, 5S ribosomal 5; RNA, 5S ribosomal 6; RNA, 5S ribosomal 7; RNA, 5S ribosomal 8
7899909	RN5S17	Homo sapiens	RNA, 5S ribosomal 9; RNA, 5S ribosomal 13; RNA, 5S ribosomal 12; RNA, 5S ribosomal 11; RNA, 5S ribosomal 10; RNA, 5S ribosomal 17; RNA, 5S ribosomal 16; RNA, 5S ribosomal 15; RNA, 5S ribosomal 14; RNA, 5S ribosomal 1; RNA, 5S ribosomal 2; RNA, 5S ribosomal 3; RNA, 5S ribosomal 4; RNA, 5S ribosomal 5; RNA, 5S ribosomal 6; RNA, 5S ribosomal 7; RNA, 5S ribosomal 8
7894927	LOC644101	Homo sapiens	similar to chromobox homolog 3; chromobox homolog 3 (HP1 gamma homolog, Drosophila)
7894927	CBX3	Homo sapiens	similar to chromobox homolog 3; chromobox homolog 3 (HP1 gamma homolog, Drosophila)
7946695	RN5S10	Homo sapiens	RNA, 5S ribosomal 9; RNA, 5S ribosomal 13; RNA, 5S ribosomal 12; RNA, 5S ribosomal 11; RNA, 5S ribosomal 10; RNA, 5S ribosomal 17; RNA, 5S ribosomal 16; RNA, 5S ribosomal 15; RNA, 5S ribosomal 14; RNA, 5S ribosomal 1; RNA, 5S ribosomal 2; RNA, 5S ribosomal 3; RNA, 5S ribosomal 4; RNA, 5S ribosomal 5; RNA, 5S ribosomal 6; RNA, 5S ribosomal 7; RNA, 5S ribosomal 8
7946695	RN5S11	Homo sapiens	RNA, 5S ribosomal 9; RNA, 5S ribosomal 13; RNA, 5S ribosomal 12; RNA, 5S ribosomal 11; RNA, 5S ribosomal 10; RNA, 5S ribosomal 17; RNA, 5S ribosomal 16; RNA, 5S ribosomal 15; RNA, 5S ribosomal 14; RNA, 5S ribosomal 1; RNA, 5S ribosomal 2; RNA, 5S ribosomal 3; RNA, 5S ribosomal 4; RNA, 5S ribosomal 5; RNA, 5S ribosomal 6; RNA, 5S ribosomal 7; RNA, 5S ribosomal 8
7946695	RN5S12	Homo sapiens	RNA, 5S ribosomal 9; RNA, 5S ribosomal 13; RNA, 5S ribosomal 12; RNA, 5S ribosomal 11; RNA, 5S ribosomal 10; RNA, 5S ribosomal 17; RNA, 5S ribosomal 16; RNA, 5S ribosomal 15; RNA, 5S ribosomal 14; RNA, 5S ribosomal 1; RNA, 5S ribosomal 2; RNA, 5S ribosomal 3; RNA, 5S ribosomal 4; RNA, 5S ribosomal 5; RNA, 5S ribosomal 6; RNA, 5S ribosomal 7; RNA, 5S ribosomal 8
7946695	RN5S13	Homo sapiens	RNA, 5S ribosomal 9; RNA, 5S ribosomal 13; RNA, 5S ribosomal 12; RNA, 5S ribosomal 11; RNA, 5S ribosomal 10; RNA, 5S ribosomal 17; RNA, 5S ribosomal 16; RNA, 5S ribosomal 15; RNA, 5S ribosomal 14; RNA, 5S ribosomal 1; RNA, 5S ribosomal 2; RNA, 5S ribosomal 3; RNA, 5S ribosomal 4; RNA, 5S ribosomal 5; RNA, 5S ribosomal 6; RNA, 5S ribosomal 7; RNA, 5S ribosomal 8
7946695	RN5S14	Homo sapiens	RNA, 5S ribosomal 9; RNA, 5S ribosomal 13; RNA, 5S ribosomal 12; RNA, 5S ribosomal 11; RNA, 5S ribosomal 10; RNA, 5S ribosomal 17; RNA, 5S ribosomal 16; RNA, 5S ribosomal 15; RNA, 5S ribosomal 14; RNA, 5S ribosomal 1; RNA, 5S ribosomal 2; RNA, 5S ribosomal 3; RNA, 5S ribosomal 4; RNA, 5S ribosomal 5; RNA, 5S ribosomal 6; RNA, 5S ribosomal 7; RNA, 5S ribosomal 8
7946695	RN5S15	Homo sapiens	RNA, 5S ribosomal 9; RNA, 5S ribosomal 13; RNA, 5S ribosomal 12; RNA, 5S ribosomal 11; RNA, 5S ribosomal 10; RNA, 5S ribosomal 17; RNA, 5S ribosomal 16; RNA, 5S ribosomal 15; RNA, 5S ribosomal 14; RNA, 5S ribosomal 1; RNA, 5S ribosomal 2; RNA, 5S ribosomal 3; RNA, 5S ribosomal 4; RNA, 5S ribosomal 5; RNA, 5S ribosomal 6; RNA, 5S ribosomal 7; RNA, 5S ribosomal 8
7946695	RN5S16	Homo sapiens	RNA, 5S ribosomal 9; RNA, 5S ribosomal 13; RNA, 5S ribosomal 12; RNA, 5S ribosomal 11; RNA, 5S ribosomal 10; RNA, 5S ribosomal 17; RNA, 5S ribosomal 16; RNA, 5S ribosomal 15; RNA, 5S ribosomal 14; RNA, 5S ribosomal 1; RNA, 5S ribosomal 2; RNA, 5S ribosomal 3; RNA, 5S ribosomal 4; RNA, 5S ribosomal 5; RNA, 5S ribosomal 6; RNA, 5S ribosomal 7; RNA, 5S ribosomal 8
7946695	RN5S6	Homo sapiens	RNA, 5S ribosomal 9; RNA, 5S ribosomal 13; RNA, 5S ribosomal 12; RNA, 5S ribosomal 11; RNA, 5S ribosomal 10; RNA, 5S ribosomal 17; RNA, 5S ribosomal 16; RNA, 5S ribosomal 15; RNA, 5S ribosomal 14; RNA, 5S ribosomal 1; RNA, 5S ribosomal 2; RNA, 5S ribosomal 3; RNA, 5S ribosomal 4; RNA, 5S ribosomal 5; RNA, 5S ribosomal 6; RNA, 5S ribosomal 7; RNA, 5S ribosomal 8
7946695	RN5S7	Homo sapiens	RNA, 5S ribosomal 9; RNA, 5S ribosomal 13; RNA, 5S ribosomal 12; RNA, 5S ribosomal 11; RNA, 5S ribosomal 10; RNA, 5S ribosomal 17; RNA, 5S ribosomal 16; RNA, 5S ribosomal 15; RNA, 5S ribosomal 14; RNA, 5S ribosomal 1; RNA, 5S ribosomal 2; RNA, 5S ribosomal 3; RNA, 5S ribosomal 4; RNA, 5S ribosomal 5; RNA, 5S ribosomal 6; RNA, 5S ribosomal 7; RNA, 5S ribosomal 8
7946695	RN5S8	Homo sapiens	RNA, 5S ribosomal 9; RNA, 5S ribosomal 13; RNA, 5S ribosomal 12; RNA, 5S ribosomal 11; RNA, 5S ribosomal 10; RNA, 5S ribosomal 17; RNA, 5S ribosomal 16; RNA, 5S ribosomal 15; RNA, 5S ribosomal 14; RNA, 5S ribosomal 1; RNA, 5S ribosomal 2; RNA, 5S ribosomal 3; RNA, 5S ribosomal 4; RNA, 5S ribosomal 5; RNA, 5S ribosomal 6; RNA, 5S ribosomal 7; RNA, 5S ribosomal 8
7946695	RN5S9	Homo sapiens	RNA, 5S ribosomal 9; RNA, 5S ribosomal 13; RNA, 5S ribosomal 12; RNA, 5S ribosomal 11; RNA, 5S ribosomal 10; RNA, 5S ribosomal 17; RNA, 5S ribosomal 16; RNA, 5S ribosomal 15; RNA, 5S ribosomal 14; RNA, 5S ribosomal 1; RNA, 5S ribosomal 2; RNA, 5S ribosomal 3; RNA, 5S ribosomal 4; RNA, 5S ribosomal 5; RNA, 5S ribosomal 6; RNA, 5S ribosomal 7; RNA, 5S ribosomal 8
7946695	RN5S2	Homo sapiens	RNA, 5S ribosomal 9; RNA, 5S ribosomal 13; RNA, 5S ribosomal 12; RNA, 5S ribosomal 11; RNA, 5S ribosomal 10; RNA, 5S ribosomal 17; RNA, 5S ribosomal 16; RNA, 5S ribosomal 15; RNA, 5S ribosomal 14; RNA, 5S ribosomal 1; RNA, 5S ribosomal 2; RNA, 5S ribosomal 3; RNA, 5S ribosomal 4; RNA, 5S ribosomal 5; RNA, 5S ribosomal 6; RNA, 5S ribosomal 7; RNA, 5S ribosomal 8
7946695	RN5S3	Homo sapiens	RNA, 5S ribosomal 9; RNA, 5S ribosomal 13; RNA, 5S ribosomal 12; RNA, 5S ribosomal 11; RNA, 5S ribosomal 10; RNA, 5S ribosomal 17; RNA, 5S ribosomal 16; RNA, 5S ribosomal 15; RNA, 5S ribosomal 14; RNA, 5S ribosomal 1; RNA, 5S ribosomal 2; RNA, 5S ribosomal 3; RNA, 5S ribosomal 4; RNA, 5S ribosomal 5; RNA, 5S ribosomal 6; RNA, 5S ribosomal 7; RNA, 5S ribosomal 8
7946695	RN5S4	Homo sapiens	RNA, 5S ribosomal 9; RNA, 5S ribosomal 13; RNA, 5S ribosomal 12; RNA, 5S ribosomal 11; RNA, 5S ribosomal 10; RNA, 5S ribosomal 17; RNA, 5S ribosomal 16; RNA, 5S ribosomal 15; RNA, 5S ribosomal 14; RNA, 5S ribosomal 1; RNA, 5S ribosomal 2; RNA, 5S ribosomal 3; RNA, 5S ribosomal 4; RNA, 5S ribosomal 5; RNA, 5S ribosomal 6; RNA, 5S ribosomal 7; RNA, 5S ribosomal 8
7946695	RN5S5	Homo sapiens	RNA, 5S ribosomal 9; RNA, 5S ribosomal 13; RNA, 5S ribosomal 12; RNA, 5S ribosomal 11; RNA, 5S ribosomal 10; RNA, 5S ribosomal 17; RNA, 5S ribosomal 16; RNA, 5S ribosomal 15; RNA, 5S ribosomal 14; RNA, 5S ribosomal 1; RNA, 5S ribosomal 2; RNA, 5S ribosomal 3; RNA, 5S ribosomal 4; RNA, 5S ribosomal 5; RNA, 5S ribosomal 6; RNA, 5S ribosomal 7; RNA, 5S ribosomal 8
7946695	RN5S1	Homo sapiens	RNA, 5S ribosomal 9; RNA, 5S ribosomal 13; RNA, 5S ribosomal 12; RNA, 5S ribosomal 11; RNA, 5S ribosomal 10; RNA, 5S ribosomal 17; RNA, 5S ribosomal 16; RNA, 5S ribosomal 15; RNA, 5S ribosomal 14; RNA, 5S ribosomal 1; RNA, 5S ribosomal 2; RNA, 5S ribosomal 3; RNA, 5S ribosomal 4; RNA, 5S ribosomal 5; RNA, 5S ribosomal 6; RNA, 5S ribosomal 7; RNA, 5S ribosomal 8
7946695	RN5S17	Homo sapiens	RNA, 5S ribosomal 9; RNA, 5S ribosomal 13; RNA, 5S ribosomal 12; RNA, 5S ribosomal 11; RNA, 5S ribosomal 10; RNA, 5S ribosomal 17; RNA, 5S ribosomal 16; RNA, 5S ribosomal 15; RNA, 5S ribosomal 14; RNA, 5S ribosomal 1; RNA, 5S ribosomal 2; RNA, 5S ribosomal 3; RNA, 5S ribosomal 4; RNA, 5S ribosomal 5; RNA, 5S ribosomal 6; RNA, 5S ribosomal 7; RNA, 5S ribosomal 8
7969364	RNU6-2	Homo sapiens	RNA, U6 small nuclear 2; RNA, U6 small nuclear 1
7969364	RNU6-1	Homo sapiens	RNA, U6 small nuclear 2; RNA, U6 small nuclear 1
7934731	C1DP2	Homo sapiens	C1D nuclear receptor co-repressor; similar to nuclear DNA-binding protein; similar to hCG1791993
7934731	C1DP3	Homo sapiens	C1D nuclear receptor co-repressor; similar to nuclear DNA-binding protein; similar to hCG1791993
7934731	C1D	Homo sapiens	C1D nuclear receptor co-repressor; similar to nuclear DNA-binding protein; similar to hCG1791993
7892701	CFL1	Homo sapiens	cofilin 1 (non-muscle)
7954899	Cntn1	Homo sapiens	contactin 1
8085815	TOP2B	Homo sapiens	topoisomerase (DNA) II beta 180kDa
8114152	SKP1	Homo sapiens	S-phase kinase-associated protein 1
8045275	RNU6-2	Homo sapiens	RNA, U6 small nuclear 2; RNA, U6 small nuclear 1
8045275	RNU6-1	Homo sapiens	RNA, U6 small nuclear 2; RNA, U6 small nuclear 1
8018439	LOC440926	Homo sapiens	H3 histone, family 3B (H3.3B); H3 histone, family 3A pseudogene; H3 histone, family 3A; similar to H3 histone, family 3B; similar to histone H3.3B
8018439	h3f3a	Homo sapiens	H3 histone, family 3B (H3.3B); H3 histone, family 3A pseudogene; H3 histone, family 3A; similar to H3 histone, family 3B; similar to histone H3.3B
8018439	LOC644914	Homo sapiens	H3 histone, family 3B (H3.3B); H3 histone, family 3A pseudogene; H3 histone, family 3A; similar to H3 histone, family 3B; similar to histone H3.3B
8018439	LOC728914	Homo sapiens	H3 histone, family 3B (H3.3B); H3 histone, family 3A pseudogene; H3 histone, family 3A; similar to H3 histone, family 3B; similar to histone H3.3B
8018439	H3f3b	Homo sapiens	H3 histone, family 3B (H3.3B); H3 histone, family 3A pseudogene; H3 histone, family 3A; similar to H3 histone, family 3B; similar to histone H3.3B
8032576	aes	Homo sapiens	amino-terminal enhancer of split
7923131	DENND1B	Homo sapiens	DENN/MADD domain containing 1B
8110676	FLJ44896	Homo sapiens	FLJ44896 protein
8037430	ZNF404	Homo sapiens	zinc finger protein 404
8110672	OR4F16	Homo sapiens	olfactory receptor, family 4, subfamily F, member 29; olfactory receptor, family 4, subfamily F, member 3; olfactory receptor, family 4, subfamily F, member 16
8110672	OR4F29	Homo sapiens	olfactory receptor, family 4, subfamily F, member 29; olfactory receptor, family 4, subfamily F, member 3; olfactory receptor, family 4, subfamily F, member 16
8110672	OR4F3	Homo sapiens	olfactory receptor, family 4, subfamily F, member 29; olfactory receptor, family 4, subfamily F, member 3; olfactory receptor, family 4, subfamily F, member 16
8085026	RpL35A	Homo sapiens	ribosomal protein L35a
8146986	HNF4G	Homo sapiens	hepatocyte nuclear factor 4, gamma
7916016	RNY4P7	Homo sapiens	hypothetical LOC100271832; RNA, Ro-associated Y5 pseudogene 10; RNA, Ro-associated Y1; RNA, Ro-associated Y4 pseudogene 7; RNA, Ro-associated Y4 pseudogene 19; RNA, Ro-associated Y3; hypothetical LOC100132111; RNA, Ro-associated Y4
7916016	LOC100271832	Homo sapiens	hypothetical LOC100271832; RNA, Ro-associated Y5 pseudogene 10; RNA, Ro-associated Y1; RNA, Ro-associated Y4 pseudogene 7; RNA, Ro-associated Y4 pseudogene 19; RNA, Ro-associated Y3; hypothetical LOC100132111; RNA, Ro-associated Y4
7916016	RNY5P10	Homo sapiens	hypothetical LOC100271832; RNA, Ro-associated Y5 pseudogene 10; RNA, Ro-associated Y1; RNA, Ro-associated Y4 pseudogene 7; RNA, Ro-associated Y4 pseudogene 19; RNA, Ro-associated Y3; hypothetical LOC100132111; RNA, Ro-associated Y4
7916016	RNY1	Homo sapiens	hypothetical LOC100271832; RNA, Ro-associated Y5 pseudogene 10; RNA, Ro-associated Y1; RNA, Ro-associated Y4 pseudogene 7; RNA, Ro-associated Y4 pseudogene 19; RNA, Ro-associated Y3; hypothetical LOC100132111; RNA, Ro-associated Y4
7916016	LOC100132111	Homo sapiens	hypothetical LOC100271832; RNA, Ro-associated Y5 pseudogene 10; RNA, Ro-associated Y1; RNA, Ro-associated Y4 pseudogene 7; RNA, Ro-associated Y4 pseudogene 19; RNA, Ro-associated Y3; hypothetical LOC100132111; RNA, Ro-associated Y4
7916016	RNY4P19	Homo sapiens	hypothetical LOC100271832; RNA, Ro-associated Y5 pseudogene 10; RNA, Ro-associated Y1; RNA, Ro-associated Y4 pseudogene 7; RNA, Ro-associated Y4 pseudogene 19; RNA, Ro-associated Y3; hypothetical LOC100132111; RNA, Ro-associated Y4
7916016	RNY3	Homo sapiens	hypothetical LOC100271832; RNA, Ro-associated Y5 pseudogene 10; RNA, Ro-associated Y1; RNA, Ro-associated Y4 pseudogene 7; RNA, Ro-associated Y4 pseudogene 19; RNA, Ro-associated Y3; hypothetical LOC100132111; RNA, Ro-associated Y4
7916016	RNY4	Homo sapiens	hypothetical LOC100271832; RNA, Ro-associated Y5 pseudogene 10; RNA, Ro-associated Y1; RNA, Ro-associated Y4 pseudogene 7; RNA, Ro-associated Y4 pseudogene 19; RNA, Ro-associated Y3; hypothetical LOC100132111; RNA, Ro-associated Y4
7902541	IFI44L	Homo sapiens	interferon-induced protein 44-like
7960359	RPS27P13	Homo sapiens	ribosomal protein S27 pseudogene 29; ribosomal protein S27 pseudogene 9; ribosomal protein S27 pseudogene 23; ribosomal protein S27 pseudogene 13; ribosomal protein S27; ribosomal protein S27 pseudogene 21; ribosomal protein S27 pseudogene 7; ribosomal protein S27 pseudogene 6; ribosomal protein S27 pseudogene 19
7960359	RPS27P19	Homo sapiens	ribosomal protein S27 pseudogene 29; ribosomal protein S27 pseudogene 9; ribosomal protein S27 pseudogene 23; ribosomal protein S27 pseudogene 13; ribosomal protein S27; ribosomal protein S27 pseudogene 21; ribosomal protein S27 pseudogene 7; ribosomal protein S27 pseudogene 6; ribosomal protein S27 pseudogene 19
7960359	RPS27P29	Homo sapiens	ribosomal protein S27 pseudogene 29; ribosomal protein S27 pseudogene 9; ribosomal protein S27 pseudogene 23; ribosomal protein S27 pseudogene 13; ribosomal protein S27; ribosomal protein S27 pseudogene 21; ribosomal protein S27 pseudogene 7; ribosomal protein S27 pseudogene 6; ribosomal protein S27 pseudogene 19
7960359	RPS27P6	Homo sapiens	ribosomal protein S27 pseudogene 29; ribosomal protein S27 pseudogene 9; ribosomal protein S27 pseudogene 23; ribosomal protein S27 pseudogene 13; ribosomal protein S27; ribosomal protein S27 pseudogene 21; ribosomal protein S27 pseudogene 7; ribosomal protein S27 pseudogene 6; ribosomal protein S27 pseudogene 19
7960359	rps27	Homo sapiens	ribosomal protein S27 pseudogene 29; ribosomal protein S27 pseudogene 9; ribosomal protein S27 pseudogene 23; ribosomal protein S27 pseudogene 13; ribosomal protein S27; ribosomal protein S27 pseudogene 21; ribosomal protein S27 pseudogene 7; ribosomal protein S27 pseudogene 6; ribosomal protein S27 pseudogene 19
7960359	RPS27P7	Homo sapiens	ribosomal protein S27 pseudogene 29; ribosomal protein S27 pseudogene 9; ribosomal protein S27 pseudogene 23; ribosomal protein S27 pseudogene 13; ribosomal protein S27; ribosomal protein S27 pseudogene 21; ribosomal protein S27 pseudogene 7; ribosomal protein S27 pseudogene 6; ribosomal protein S27 pseudogene 19
7960359	RPS27P21	Homo sapiens	ribosomal protein S27 pseudogene 29; ribosomal protein S27 pseudogene 9; ribosomal protein S27 pseudogene 23; ribosomal protein S27 pseudogene 13; ribosomal protein S27; ribosomal protein S27 pseudogene 21; ribosomal protein S27 pseudogene 7; ribosomal protein S27 pseudogene 6; ribosomal protein S27 pseudogene 19
7960359	RPS27P9	Homo sapiens	ribosomal protein S27 pseudogene 29; ribosomal protein S27 pseudogene 9; ribosomal protein S27 pseudogene 23; ribosomal protein S27 pseudogene 13; ribosomal protein S27; ribosomal protein S27 pseudogene 21; ribosomal protein S27 pseudogene 7; ribosomal protein S27 pseudogene 6; ribosomal protein S27 pseudogene 19
7960359	RPS27P23	Homo sapiens	ribosomal protein S27 pseudogene 29; ribosomal protein S27 pseudogene 9; ribosomal protein S27 pseudogene 23; ribosomal protein S27 pseudogene 13; ribosomal protein S27; ribosomal protein S27 pseudogene 21; ribosomal protein S27 pseudogene 7; ribosomal protein S27 pseudogene 6; ribosomal protein S27 pseudogene 19
8094897	RNU6-2	Homo sapiens	RNA, U6 small nuclear 2; RNA, U6 small nuclear 1
8094897	RNU6-1	Homo sapiens	RNA, U6 small nuclear 2; RNA, U6 small nuclear 1
7933572	LOC100133130	Homo sapiens	PRO1102
8081194	OR5H1	Homo sapiens	olfactory receptor, family 5, subfamily H, member 1
8120378	KIAA1586	Homo sapiens	KIAA1586
8110668	RNU6-2	Homo sapiens	RNA, U6 small nuclear 2; RNA, U6 small nuclear 1
8110668	RNU6-1	Homo sapiens	RNA, U6 small nuclear 2; RNA, U6 small nuclear 1
7942964	TMEM135	Homo sapiens	transmembrane protein 135
8180195	Cfhr1	Homo sapiens	complement factor H-related 1
7923141	DENND1B	Homo sapiens	DENN/MADD domain containing 1B
7928489	RNY4P7	Homo sapiens	hypothetical LOC100271832; RNA, Ro-associated Y5 pseudogene 10; RNA, Ro-associated Y1; RNA, Ro-associated Y4 pseudogene 7; RNA, Ro-associated Y4 pseudogene 19; RNA, Ro-associated Y3; hypothetical LOC100132111; RNA, Ro-associated Y4
7928489	LOC100271832	Homo sapiens	hypothetical LOC100271832; RNA, Ro-associated Y5 pseudogene 10; RNA, Ro-associated Y1; RNA, Ro-associated Y4 pseudogene 7; RNA, Ro-associated Y4 pseudogene 19; RNA, Ro-associated Y3; hypothetical LOC100132111; RNA, Ro-associated Y4
7928489	RNY5P10	Homo sapiens	hypothetical LOC100271832; RNA, Ro-associated Y5 pseudogene 10; RNA, Ro-associated Y1; RNA, Ro-associated Y4 pseudogene 7; RNA, Ro-associated Y4 pseudogene 19; RNA, Ro-associated Y3; hypothetical LOC100132111; RNA, Ro-associated Y4
7928489	RNY1	Homo sapiens	hypothetical LOC100271832; RNA, Ro-associated Y5 pseudogene 10; RNA, Ro-associated Y1; RNA, Ro-associated Y4 pseudogene 7; RNA, Ro-associated Y4 pseudogene 19; RNA, Ro-associated Y3; hypothetical LOC100132111; RNA, Ro-associated Y4
7928489	LOC100132111	Homo sapiens	hypothetical LOC100271832; RNA, Ro-associated Y5 pseudogene 10; RNA, Ro-associated Y1; RNA, Ro-associated Y4 pseudogene 7; RNA, Ro-associated Y4 pseudogene 19; RNA, Ro-associated Y3; hypothetical LOC100132111; RNA, Ro-associated Y4
7928489	RNY4P19	Homo sapiens	hypothetical LOC100271832; RNA, Ro-associated Y5 pseudogene 10; RNA, Ro-associated Y1; RNA, Ro-associated Y4 pseudogene 7; RNA, Ro-associated Y4 pseudogene 19; RNA, Ro-associated Y3; hypothetical LOC100132111; RNA, Ro-associated Y4
7928489	RNY3	Homo sapiens	hypothetical LOC100271832; RNA, Ro-associated Y5 pseudogene 10; RNA, Ro-associated Y1; RNA, Ro-associated Y4 pseudogene 7; RNA, Ro-associated Y4 pseudogene 19; RNA, Ro-associated Y3; hypothetical LOC100132111; RNA, Ro-associated Y4
7928489	RNY4	Homo sapiens	hypothetical LOC100271832; RNA, Ro-associated Y5 pseudogene 10; RNA, Ro-associated Y1; RNA, Ro-associated Y4 pseudogene 7; RNA, Ro-associated Y4 pseudogene 19; RNA, Ro-associated Y3; hypothetical LOC100132111; RNA, Ro-associated Y4
7999827	RPS15AP12	Homo sapiens	ribosomal protein S15a pseudogene 17; ribosomal protein S15a pseudogene 19; ribosomal protein S15a pseudogene 12; ribosomal protein S15a pseudogene 24; ribosomal protein S15a pseudogene 11; ribosomal protein S15a
7999827	RPS15AP24	Homo sapiens	ribosomal protein S15a pseudogene 17; ribosomal protein S15a pseudogene 19; ribosomal protein S15a pseudogene 12; ribosomal protein S15a pseudogene 24; ribosomal protein S15a pseudogene 11; ribosomal protein S15a
7999827	RPS15AP11	Homo sapiens	ribosomal protein S15a pseudogene 17; ribosomal protein S15a pseudogene 19; ribosomal protein S15a pseudogene 12; ribosomal protein S15a pseudogene 24; ribosomal protein S15a pseudogene 11; ribosomal protein S15a
7999827	RPS15AP17	Homo sapiens	ribosomal protein S15a pseudogene 17; ribosomal protein S15a pseudogene 19; ribosomal protein S15a pseudogene 12; ribosomal protein S15a pseudogene 24; ribosomal protein S15a pseudogene 11; ribosomal protein S15a
7999827	RPS15AP19	Homo sapiens	ribosomal protein S15a pseudogene 17; ribosomal protein S15a pseudogene 19; ribosomal protein S15a pseudogene 12; ribosomal protein S15a pseudogene 24; ribosomal protein S15a pseudogene 11; ribosomal protein S15a
7999827	RPS15A	Homo sapiens	ribosomal protein S15a pseudogene 17; ribosomal protein S15a pseudogene 19; ribosomal protein S15a pseudogene 12; ribosomal protein S15a pseudogene 24; ribosomal protein S15a pseudogene 11; ribosomal protein S15a
8117018	RNU6-2	Homo sapiens	RNA, U6 small nuclear 2; RNA, U6 small nuclear 1
8117018	RNU6-1	Homo sapiens	RNA, U6 small nuclear 2; RNA, U6 small nuclear 1
7917468	RN5S10	Homo sapiens	RNA, 5S ribosomal 9; RNA, 5S ribosomal 13; RNA, 5S ribosomal 12; RNA, 5S ribosomal 11; RNA, 5S ribosomal 10; RNA, 5S ribosomal 17; RNA, 5S ribosomal 16; RNA, 5S ribosomal 15; RNA, 5S ribosomal 14; RNA, 5S ribosomal 1; RNA, 5S ribosomal 2; RNA, 5S ribosomal 3; RNA, 5S ribosomal 4; RNA, 5S ribosomal 5; RNA, 5S ribosomal 6; RNA, 5S ribosomal 7; RNA, 5S ribosomal 8
7917468	RN5S11	Homo sapiens	RNA, 5S ribosomal 9; RNA, 5S ribosomal 13; RNA, 5S ribosomal 12; RNA, 5S ribosomal 11; RNA, 5S ribosomal 10; RNA, 5S ribosomal 17; RNA, 5S ribosomal 16; RNA, 5S ribosomal 15; RNA, 5S ribosomal 14; RNA, 5S ribosomal 1; RNA, 5S ribosomal 2; RNA, 5S ribosomal 3; RNA, 5S ribosomal 4; RNA, 5S ribosomal 5; RNA, 5S ribosomal 6; RNA, 5S ribosomal 7; RNA, 5S ribosomal 8
7917468	RN5S12	Homo sapiens	RNA, 5S ribosomal 9; RNA, 5S ribosomal 13; RNA, 5S ribosomal 12; RNA, 5S ribosomal 11; RNA, 5S ribosomal 10; RNA, 5S ribosomal 17; RNA, 5S ribosomal 16; RNA, 5S ribosomal 15; RNA, 5S ribosomal 14; RNA, 5S ribosomal 1; RNA, 5S ribosomal 2; RNA, 5S ribosomal 3; RNA, 5S ribosomal 4; RNA, 5S ribosomal 5; RNA, 5S ribosomal 6; RNA, 5S ribosomal 7; RNA, 5S ribosomal 8
7917468	RN5S13	Homo sapiens	RNA, 5S ribosomal 9; RNA, 5S ribosomal 13; RNA, 5S ribosomal 12; RNA, 5S ribosomal 11; RNA, 5S ribosomal 10; RNA, 5S ribosomal 17; RNA, 5S ribosomal 16; RNA, 5S ribosomal 15; RNA, 5S ribosomal 14; RNA, 5S ribosomal 1; RNA, 5S ribosomal 2; RNA, 5S ribosomal 3; RNA, 5S ribosomal 4; RNA, 5S ribosomal 5; RNA, 5S ribosomal 6; RNA, 5S ribosomal 7; RNA, 5S ribosomal 8
7917468	RN5S14	Homo sapiens	RNA, 5S ribosomal 9; RNA, 5S ribosomal 13; RNA, 5S ribosomal 12; RNA, 5S ribosomal 11; RNA, 5S ribosomal 10; RNA, 5S ribosomal 17; RNA, 5S ribosomal 16; RNA, 5S ribosomal 15; RNA, 5S ribosomal 14; RNA, 5S ribosomal 1; RNA, 5S ribosomal 2; RNA, 5S ribosomal 3; RNA, 5S ribosomal 4; RNA, 5S ribosomal 5; RNA, 5S ribosomal 6; RNA, 5S ribosomal 7; RNA, 5S ribosomal 8
7917468	RN5S15	Homo sapiens	RNA, 5S ribosomal 9; RNA, 5S ribosomal 13; RNA, 5S ribosomal 12; RNA, 5S ribosomal 11; RNA, 5S ribosomal 10; RNA, 5S ribosomal 17; RNA, 5S ribosomal 16; RNA, 5S ribosomal 15; RNA, 5S ribosomal 14; RNA, 5S ribosomal 1; RNA, 5S ribosomal 2; RNA, 5S ribosomal 3; RNA, 5S ribosomal 4; RNA, 5S ribosomal 5; RNA, 5S ribosomal 6; RNA, 5S ribosomal 7; RNA, 5S ribosomal 8
7917468	RN5S16	Homo sapiens	RNA, 5S ribosomal 9; RNA, 5S ribosomal 13; RNA, 5S ribosomal 12; RNA, 5S ribosomal 11; RNA, 5S ribosomal 10; RNA, 5S ribosomal 17; RNA, 5S ribosomal 16; RNA, 5S ribosomal 15; RNA, 5S ribosomal 14; RNA, 5S ribosomal 1; RNA, 5S ribosomal 2; RNA, 5S ribosomal 3; RNA, 5S ribosomal 4; RNA, 5S ribosomal 5; RNA, 5S ribosomal 6; RNA, 5S ribosomal 7; RNA, 5S ribosomal 8
7917468	RN5S6	Homo sapiens	RNA, 5S ribosomal 9; RNA, 5S ribosomal 13; RNA, 5S ribosomal 12; RNA, 5S ribosomal 11; RNA, 5S ribosomal 10; RNA, 5S ribosomal 17; RNA, 5S ribosomal 16; RNA, 5S ribosomal 15; RNA, 5S ribosomal 14; RNA, 5S ribosomal 1; RNA, 5S ribosomal 2; RNA, 5S ribosomal 3; RNA, 5S ribosomal 4; RNA, 5S ribosomal 5; RNA, 5S ribosomal 6; RNA, 5S ribosomal 7; RNA, 5S ribosomal 8
7917468	RN5S7	Homo sapiens	RNA, 5S ribosomal 9; RNA, 5S ribosomal 13; RNA, 5S ribosomal 12; RNA, 5S ribosomal 11; RNA, 5S ribosomal 10; RNA, 5S ribosomal 17; RNA, 5S ribosomal 16; RNA, 5S ribosomal 15; RNA, 5S ribosomal 14; RNA, 5S ribosomal 1; RNA, 5S ribosomal 2; RNA, 5S ribosomal 3; RNA, 5S ribosomal 4; RNA, 5S ribosomal 5; RNA, 5S ribosomal 6; RNA, 5S ribosomal 7; RNA, 5S ribosomal 8
7917468	RN5S8	Homo sapiens	RNA, 5S ribosomal 9; RNA, 5S ribosomal 13; RNA, 5S ribosomal 12; RNA, 5S ribosomal 11; RNA, 5S ribosomal 10; RNA, 5S ribosomal 17; RNA, 5S ribosomal 16; RNA, 5S ribosomal 15; RNA, 5S ribosomal 14; RNA, 5S ribosomal 1; RNA, 5S ribosomal 2; RNA, 5S ribosomal 3; RNA, 5S ribosomal 4; RNA, 5S ribosomal 5; RNA, 5S ribosomal 6; RNA, 5S ribosomal 7; RNA, 5S ribosomal 8
7917468	RN5S9	Homo sapiens	RNA, 5S ribosomal 9; RNA, 5S ribosomal 13; RNA, 5S ribosomal 12; RNA, 5S ribosomal 11; RNA, 5S ribosomal 10; RNA, 5S ribosomal 17; RNA, 5S ribosomal 16; RNA, 5S ribosomal 15; RNA, 5S ribosomal 14; RNA, 5S ribosomal 1; RNA, 5S ribosomal 2; RNA, 5S ribosomal 3; RNA, 5S ribosomal 4; RNA, 5S ribosomal 5; RNA, 5S ribosomal 6; RNA, 5S ribosomal 7; RNA, 5S ribosomal 8
7917468	RN5S2	Homo sapiens	RNA, 5S ribosomal 9; RNA, 5S ribosomal 13; RNA, 5S ribosomal 12; RNA, 5S ribosomal 11; RNA, 5S ribosomal 10; RNA, 5S ribosomal 17; RNA, 5S ribosomal 16; RNA, 5S ribosomal 15; RNA, 5S ribosomal 14; RNA, 5S ribosomal 1; RNA, 5S ribosomal 2; RNA, 5S ribosomal 3; RNA, 5S ribosomal 4; RNA, 5S ribosomal 5; RNA, 5S ribosomal 6; RNA, 5S ribosomal 7; RNA, 5S ribosomal 8
7917468	RN5S3	Homo sapiens	RNA, 5S ribosomal 9; RNA, 5S ribosomal 13; RNA, 5S ribosomal 12; RNA, 5S ribosomal 11; RNA, 5S ribosomal 10; RNA, 5S ribosomal 17; RNA, 5S ribosomal 16; RNA, 5S ribosomal 15; RNA, 5S ribosomal 14; RNA, 5S ribosomal 1; RNA, 5S ribosomal 2; RNA, 5S ribosomal 3; RNA, 5S ribosomal 4; RNA, 5S ribosomal 5; RNA, 5S ribosomal 6; RNA, 5S ribosomal 7; RNA, 5S ribosomal 8
7917468	RN5S4	Homo sapiens	RNA, 5S ribosomal 9; RNA, 5S ribosomal 13; RNA, 5S ribosomal 12; RNA, 5S ribosomal 11; RNA, 5S ribosomal 10; RNA, 5S ribosomal 17; RNA, 5S ribosomal 16; RNA, 5S ribosomal 15; RNA, 5S ribosomal 14; RNA, 5S ribosomal 1; RNA, 5S ribosomal 2; RNA, 5S ribosomal 3; RNA, 5S ribosomal 4; RNA, 5S ribosomal 5; RNA, 5S ribosomal 6; RNA, 5S ribosomal 7; RNA, 5S ribosomal 8
7917468	RN5S5	Homo sapiens	RNA, 5S ribosomal 9; RNA, 5S ribosomal 13; RNA, 5S ribosomal 12; RNA, 5S ribosomal 11; RNA, 5S ribosomal 10; RNA, 5S ribosomal 17; RNA, 5S ribosomal 16; RNA, 5S ribosomal 15; RNA, 5S ribosomal 14; RNA, 5S ribosomal 1; RNA, 5S ribosomal 2; RNA, 5S ribosomal 3; RNA, 5S ribosomal 4; RNA, 5S ribosomal 5; RNA, 5S ribosomal 6; RNA, 5S ribosomal 7; RNA, 5S ribosomal 8
7917468	RN5S1	Homo sapiens	RNA, 5S ribosomal 9; RNA, 5S ribosomal 13; RNA, 5S ribosomal 12; RNA, 5S ribosomal 11; RNA, 5S ribosomal 10; RNA, 5S ribosomal 17; RNA, 5S ribosomal 16; RNA, 5S ribosomal 15; RNA, 5S ribosomal 14; RNA, 5S ribosomal 1; RNA, 5S ribosomal 2; RNA, 5S ribosomal 3; RNA, 5S ribosomal 4; RNA, 5S ribosomal 5; RNA, 5S ribosomal 6; RNA, 5S ribosomal 7; RNA, 5S ribosomal 8
7917468	RN5S17	Homo sapiens	RNA, 5S ribosomal 9; RNA, 5S ribosomal 13; RNA, 5S ribosomal 12; RNA, 5S ribosomal 11; RNA, 5S ribosomal 10; RNA, 5S ribosomal 17; RNA, 5S ribosomal 16; RNA, 5S ribosomal 15; RNA, 5S ribosomal 14; RNA, 5S ribosomal 1; RNA, 5S ribosomal 2; RNA, 5S ribosomal 3; RNA, 5S ribosomal 4; RNA, 5S ribosomal 5; RNA, 5S ribosomal 6; RNA, 5S ribosomal 7; RNA, 5S ribosomal 8
8120360	RNU6-2	Homo sapiens	RNA, U6 small nuclear 2; RNA, U6 small nuclear 1
8120360	RNU6-1	Homo sapiens	RNA, U6 small nuclear 2; RNA, U6 small nuclear 1
7937707	FAM99B	Homo sapiens	family with sequence similarity 99, member A; family with sequence similarity 99, member B
7937707	FAM99A	Homo sapiens	family with sequence similarity 99, member A; family with sequence similarity 99, member B
8147992	RNY4P7	Homo sapiens	hypothetical LOC100271832; RNA, Ro-associated Y5 pseudogene 10; RNA, Ro-associated Y1; RNA, Ro-associated Y4 pseudogene 7; RNA, Ro-associated Y4 pseudogene 19; RNA, Ro-associated Y3; hypothetical LOC100132111; RNA, Ro-associated Y4
8147992	LOC100271832	Homo sapiens	hypothetical LOC100271832; RNA, Ro-associated Y5 pseudogene 10; RNA, Ro-associated Y1; RNA, Ro-associated Y4 pseudogene 7; RNA, Ro-associated Y4 pseudogene 19; RNA, Ro-associated Y3; hypothetical LOC100132111; RNA, Ro-associated Y4
8147992	RNY5P10	Homo sapiens	hypothetical LOC100271832; RNA, Ro-associated Y5 pseudogene 10; RNA, Ro-associated Y1; RNA, Ro-associated Y4 pseudogene 7; RNA, Ro-associated Y4 pseudogene 19; RNA, Ro-associated Y3; hypothetical LOC100132111; RNA, Ro-associated Y4
8147992	RNY1	Homo sapiens	hypothetical LOC100271832; RNA, Ro-associated Y5 pseudogene 10; RNA, Ro-associated Y1; RNA, Ro-associated Y4 pseudogene 7; RNA, Ro-associated Y4 pseudogene 19; RNA, Ro-associated Y3; hypothetical LOC100132111; RNA, Ro-associated Y4
8147992	LOC100132111	Homo sapiens	hypothetical LOC100271832; RNA, Ro-associated Y5 pseudogene 10; RNA, Ro-associated Y1; RNA, Ro-associated Y4 pseudogene 7; RNA, Ro-associated Y4 pseudogene 19; RNA, Ro-associated Y3; hypothetical LOC100132111; RNA, Ro-associated Y4
8147992	RNY4P19	Homo sapiens	hypothetical LOC100271832; RNA, Ro-associated Y5 pseudogene 10; RNA, Ro-associated Y1; RNA, Ro-associated Y4 pseudogene 7; RNA, Ro-associated Y4 pseudogene 19; RNA, Ro-associated Y3; hypothetical LOC100132111; RNA, Ro-associated Y4
8147992	RNY3	Homo sapiens	hypothetical LOC100271832; RNA, Ro-associated Y5 pseudogene 10; RNA, Ro-associated Y1; RNA, Ro-associated Y4 pseudogene 7; RNA, Ro-associated Y4 pseudogene 19; RNA, Ro-associated Y3; hypothetical LOC100132111; RNA, Ro-associated Y4
8147992	RNY4	Homo sapiens	hypothetical LOC100271832; RNA, Ro-associated Y5 pseudogene 10; RNA, Ro-associated Y1; RNA, Ro-associated Y4 pseudogene 7; RNA, Ro-associated Y4 pseudogene 19; RNA, Ro-associated Y3; hypothetical LOC100132111; RNA, Ro-associated Y4
7895192	Prpf8	Homo sapiens	PRP8 pre-mRNA processing factor 8 homolog (S. cerevisiae)
8151999	RGS22	Homo sapiens	regulator of G-protein signaling 22
7897801	RNU5A	Homo sapiens	RNA, U5E small nuclear; RNA, U5A small nuclear; RNA, U5F small nuclear; RNA, U5B small nuclear 1; RNA, U5D small nuclear
7897801	RNU5B-1	Homo sapiens	RNA, U5E small nuclear; RNA, U5A small nuclear; RNA, U5F small nuclear; RNA, U5B small nuclear 1; RNA, U5D small nuclear
7897801	RNU5F	Homo sapiens	RNA, U5E small nuclear; RNA, U5A small nuclear; RNA, U5F small nuclear; RNA, U5B small nuclear 1; RNA, U5D small nuclear
7897801	RNU5E	Homo sapiens	RNA, U5E small nuclear; RNA, U5A small nuclear; RNA, U5F small nuclear; RNA, U5B small nuclear 1; RNA, U5D small nuclear
7897801	RNU5D	Homo sapiens	RNA, U5E small nuclear; RNA, U5A small nuclear; RNA, U5F small nuclear; RNA, U5B small nuclear 1; RNA, U5D small nuclear
8067017	DPM1	Homo sapiens	dolichyl-phosphate mannosyltransferase polypeptide 1, catalytic subunit
8018038	abca5	Homo sapiens	ATP-binding cassette, sub-family A (ABC1), member 5
8092741	Uts2d	Homo sapiens	urotensin 2 domain containing
7896647	Prpf8	Homo sapiens	PRP8 pre-mRNA processing factor 8 homolog (S. cerevisiae)
7893394	LOC645086	Homo sapiens	chromosome 11 open reading frame 58 pseudogene; chromosome 11 open reading frame 58
7893394	C11orf58	Homo sapiens	chromosome 11 open reading frame 58 pseudogene; chromosome 11 open reading frame 58
8017173	DHX40P1	Homo sapiens	DEAH (Asp-Glu-Ala-His) box polypeptide 40 pseudogene
7927529	msmB	Homo sapiens	microseminoprotein, beta-
7893395	GUK1	Homo sapiens	guanylate kinase 1
8147194	CNBD1	Homo sapiens	cyclic nucleotide binding domain containing 1
8112014	RNU6-2	Homo sapiens	RNA, U6 small nuclear 2; RNA, U6 small nuclear 1
8112014	RNU6-1	Homo sapiens	RNA, U6 small nuclear 2; RNA, U6 small nuclear 1
7907049	RN5S10	Homo sapiens	RNA, 5S ribosomal 9; RNA, 5S ribosomal 13; RNA, 5S ribosomal 12; RNA, 5S ribosomal 11; RNA, 5S ribosomal 10; RNA, 5S ribosomal 17; RNA, 5S ribosomal 16; RNA, 5S ribosomal 15; RNA, 5S ribosomal 14; RNA, 5S ribosomal 1; RNA, 5S ribosomal 2; RNA, 5S ribosomal 3; RNA, 5S ribosomal 4; RNA, 5S ribosomal 5; RNA, 5S ribosomal 6; RNA, 5S ribosomal 7; RNA, 5S ribosomal 8
7907049	RN5S11	Homo sapiens	RNA, 5S ribosomal 9; RNA, 5S ribosomal 13; RNA, 5S ribosomal 12; RNA, 5S ribosomal 11; RNA, 5S ribosomal 10; RNA, 5S ribosomal 17; RNA, 5S ribosomal 16; RNA, 5S ribosomal 15; RNA, 5S ribosomal 14; RNA, 5S ribosomal 1; RNA, 5S ribosomal 2; RNA, 5S ribosomal 3; RNA, 5S ribosomal 4; RNA, 5S ribosomal 5; RNA, 5S ribosomal 6; RNA, 5S ribosomal 7; RNA, 5S ribosomal 8
7907049	RN5S12	Homo sapiens	RNA, 5S ribosomal 9; RNA, 5S ribosomal 13; RNA, 5S ribosomal 12; RNA, 5S ribosomal 11; RNA, 5S ribosomal 10; RNA, 5S ribosomal 17; RNA, 5S ribosomal 16; RNA, 5S ribosomal 15; RNA, 5S ribosomal 14; RNA, 5S ribosomal 1; RNA, 5S ribosomal 2; RNA, 5S ribosomal 3; RNA, 5S ribosomal 4; RNA, 5S ribosomal 5; RNA, 5S ribosomal 6; RNA, 5S ribosomal 7; RNA, 5S ribosomal 8
7907049	RN5S13	Homo sapiens	RNA, 5S ribosomal 9; RNA, 5S ribosomal 13; RNA, 5S ribosomal 12; RNA, 5S ribosomal 11; RNA, 5S ribosomal 10; RNA, 5S ribosomal 17; RNA, 5S ribosomal 16; RNA, 5S ribosomal 15; RNA, 5S ribosomal 14; RNA, 5S ribosomal 1; RNA, 5S ribosomal 2; RNA, 5S ribosomal 3; RNA, 5S ribosomal 4; RNA, 5S ribosomal 5; RNA, 5S ribosomal 6; RNA, 5S ribosomal 7; RNA, 5S ribosomal 8
7907049	RN5S14	Homo sapiens	RNA, 5S ribosomal 9; RNA, 5S ribosomal 13; RNA, 5S ribosomal 12; RNA, 5S ribosomal 11; RNA, 5S ribosomal 10; RNA, 5S ribosomal 17; RNA, 5S ribosomal 16; RNA, 5S ribosomal 15; RNA, 5S ribosomal 14; RNA, 5S ribosomal 1; RNA, 5S ribosomal 2; RNA, 5S ribosomal 3; RNA, 5S ribosomal 4; RNA, 5S ribosomal 5; RNA, 5S ribosomal 6; RNA, 5S ribosomal 7; RNA, 5S ribosomal 8
7907049	RN5S15	Homo sapiens	RNA, 5S ribosomal 9; RNA, 5S ribosomal 13; RNA, 5S ribosomal 12; RNA, 5S ribosomal 11; RNA, 5S ribosomal 10; RNA, 5S ribosomal 17; RNA, 5S ribosomal 16; RNA, 5S ribosomal 15; RNA, 5S ribosomal 14; RNA, 5S ribosomal 1; RNA, 5S ribosomal 2; RNA, 5S ribosomal 3; RNA, 5S ribosomal 4; RNA, 5S ribosomal 5; RNA, 5S ribosomal 6; RNA, 5S ribosomal 7; RNA, 5S ribosomal 8
7907049	RN5S16	Homo sapiens	RNA, 5S ribosomal 9; RNA, 5S ribosomal 13; RNA, 5S ribosomal 12; RNA, 5S ribosomal 11; RNA, 5S ribosomal 10; RNA, 5S ribosomal 17; RNA, 5S ribosomal 16; RNA, 5S ribosomal 15; RNA, 5S ribosomal 14; RNA, 5S ribosomal 1; RNA, 5S ribosomal 2; RNA, 5S ribosomal 3; RNA, 5S ribosomal 4; RNA, 5S ribosomal 5; RNA, 5S ribosomal 6; RNA, 5S ribosomal 7; RNA, 5S ribosomal 8
7907049	RN5S6	Homo sapiens	RNA, 5S ribosomal 9; RNA, 5S ribosomal 13; RNA, 5S ribosomal 12; RNA, 5S ribosomal 11; RNA, 5S ribosomal 10; RNA, 5S ribosomal 17; RNA, 5S ribosomal 16; RNA, 5S ribosomal 15; RNA, 5S ribosomal 14; RNA, 5S ribosomal 1; RNA, 5S ribosomal 2; RNA, 5S ribosomal 3; RNA, 5S ribosomal 4; RNA, 5S ribosomal 5; RNA, 5S ribosomal 6; RNA, 5S ribosomal 7; RNA, 5S ribosomal 8
7907049	RN5S7	Homo sapiens	RNA, 5S ribosomal 9; RNA, 5S ribosomal 13; RNA, 5S ribosomal 12; RNA, 5S ribosomal 11; RNA, 5S ribosomal 10; RNA, 5S ribosomal 17; RNA, 5S ribosomal 16; RNA, 5S ribosomal 15; RNA, 5S ribosomal 14; RNA, 5S ribosomal 1; RNA, 5S ribosomal 2; RNA, 5S ribosomal 3; RNA, 5S ribosomal 4; RNA, 5S ribosomal 5; RNA, 5S ribosomal 6; RNA, 5S ribosomal 7; RNA, 5S ribosomal 8
7907049	RN5S8	Homo sapiens	RNA, 5S ribosomal 9; RNA, 5S ribosomal 13; RNA, 5S ribosomal 12; RNA, 5S ribosomal 11; RNA, 5S ribosomal 10; RNA, 5S ribosomal 17; RNA, 5S ribosomal 16; RNA, 5S ribosomal 15; RNA, 5S ribosomal 14; RNA, 5S ribosomal 1; RNA, 5S ribosomal 2; RNA, 5S ribosomal 3; RNA, 5S ribosomal 4; RNA, 5S ribosomal 5; RNA, 5S ribosomal 6; RNA, 5S ribosomal 7; RNA, 5S ribosomal 8
7907049	RN5S9	Homo sapiens	RNA, 5S ribosomal 9; RNA, 5S ribosomal 13; RNA, 5S ribosomal 12; RNA, 5S ribosomal 11; RNA, 5S ribosomal 10; RNA, 5S ribosomal 17; RNA, 5S ribosomal 16; RNA, 5S ribosomal 15; RNA, 5S ribosomal 14; RNA, 5S ribosomal 1; RNA, 5S ribosomal 2; RNA, 5S ribosomal 3; RNA, 5S ribosomal 4; RNA, 5S ribosomal 5; RNA, 5S ribosomal 6; RNA, 5S ribosomal 7; RNA, 5S ribosomal 8
7907049	RN5S2	Homo sapiens	RNA, 5S ribosomal 9; RNA, 5S ribosomal 13; RNA, 5S ribosomal 12; RNA, 5S ribosomal 11; RNA, 5S ribosomal 10; RNA, 5S ribosomal 17; RNA, 5S ribosomal 16; RNA, 5S ribosomal 15; RNA, 5S ribosomal 14; RNA, 5S ribosomal 1; RNA, 5S ribosomal 2; RNA, 5S ribosomal 3; RNA, 5S ribosomal 4; RNA, 5S ribosomal 5; RNA, 5S ribosomal 6; RNA, 5S ribosomal 7; RNA, 5S ribosomal 8
7907049	RN5S3	Homo sapiens	RNA, 5S ribosomal 9; RNA, 5S ribosomal 13; RNA, 5S ribosomal 12; RNA, 5S ribosomal 11; RNA, 5S ribosomal 10; RNA, 5S ribosomal 17; RNA, 5S ribosomal 16; RNA, 5S ribosomal 15; RNA, 5S ribosomal 14; RNA, 5S ribosomal 1; RNA, 5S ribosomal 2; RNA, 5S ribosomal 3; RNA, 5S ribosomal 4; RNA, 5S ribosomal 5; RNA, 5S ribosomal 6; RNA, 5S ribosomal 7; RNA, 5S ribosomal 8
7907049	RN5S4	Homo sapiens	RNA, 5S ribosomal 9; RNA, 5S ribosomal 13; RNA, 5S ribosomal 12; RNA, 5S ribosomal 11; RNA, 5S ribosomal 10; RNA, 5S ribosomal 17; RNA, 5S ribosomal 16; RNA, 5S ribosomal 15; RNA, 5S ribosomal 14; RNA, 5S ribosomal 1; RNA, 5S ribosomal 2; RNA, 5S ribosomal 3; RNA, 5S ribosomal 4; RNA, 5S ribosomal 5; RNA, 5S ribosomal 6; RNA, 5S ribosomal 7; RNA, 5S ribosomal 8
7907049	RN5S5	Homo sapiens	RNA, 5S ribosomal 9; RNA, 5S ribosomal 13; RNA, 5S ribosomal 12; RNA, 5S ribosomal 11; RNA, 5S ribosomal 10; RNA, 5S ribosomal 17; RNA, 5S ribosomal 16; RNA, 5S ribosomal 15; RNA, 5S ribosomal 14; RNA, 5S ribosomal 1; RNA, 5S ribosomal 2; RNA, 5S ribosomal 3; RNA, 5S ribosomal 4; RNA, 5S ribosomal 5; RNA, 5S ribosomal 6; RNA, 5S ribosomal 7; RNA, 5S ribosomal 8
7907049	RN5S1	Homo sapiens	RNA, 5S ribosomal 9; RNA, 5S ribosomal 13; RNA, 5S ribosomal 12; RNA, 5S ribosomal 11; RNA, 5S ribosomal 10; RNA, 5S ribosomal 17; RNA, 5S ribosomal 16; RNA, 5S ribosomal 15; RNA, 5S ribosomal 14; RNA, 5S ribosomal 1; RNA, 5S ribosomal 2; RNA, 5S ribosomal 3; RNA, 5S ribosomal 4; RNA, 5S ribosomal 5; RNA, 5S ribosomal 6; RNA, 5S ribosomal 7; RNA, 5S ribosomal 8
7907049	RN5S17	Homo sapiens	RNA, 5S ribosomal 9; RNA, 5S ribosomal 13; RNA, 5S ribosomal 12; RNA, 5S ribosomal 11; RNA, 5S ribosomal 10; RNA, 5S ribosomal 17; RNA, 5S ribosomal 16; RNA, 5S ribosomal 15; RNA, 5S ribosomal 14; RNA, 5S ribosomal 1; RNA, 5S ribosomal 2; RNA, 5S ribosomal 3; RNA, 5S ribosomal 4; RNA, 5S ribosomal 5; RNA, 5S ribosomal 6; RNA, 5S ribosomal 7; RNA, 5S ribosomal 8
7926896	cks1b	Homo sapiens	CDC28 protein kinase regulatory subunit 1B
7978739	TRAPPC6B	Homo sapiens	trafficking protein particle complex 6B
7962085	IPO8	Homo sapiens	importin 8
7896232	hnrnpm	Homo sapiens	heterogeneous nuclear ribonucleoprotein M
7926484	RNU4-2	Homo sapiens	RNA, U4 small nuclear 2; RNA, U4 small nuclear 1; RNA, U4 small nuclear 1B
7926484	RNU4-1	Homo sapiens	RNA, U4 small nuclear 2; RNA, U4 small nuclear 1; RNA, U4 small nuclear 1B
7926484	RNU4-1B	Homo sapiens	RNA, U4 small nuclear 2; RNA, U4 small nuclear 1; RNA, U4 small nuclear 1B
8083941	ECT2	Homo sapiens	epithelial cell transforming sequence 2 oncogene
8017162	RNFT1	Homo sapiens	ring finger protein, transmembrane 1
7895588	2014-09-02	Homo sapiens	septin 2
7893385	rpl14	Homo sapiens	ribosomal protein L14
8153426	C8orf73	Homo sapiens	chromosome 8 open reading frame 73
7895585	HSP90AB1	Homo sapiens	heat shock protein 90kDa alpha (cytosolic), class B member 1
8005204	CCDC144B	Homo sapiens	coiled-coil domain containing 144B; coiled-coil domain containing 144A; coiled-coil domain containing 144C
8005204	CCDC144C	Homo sapiens	coiled-coil domain containing 144B; coiled-coil domain containing 144A; coiled-coil domain containing 144C
8005204	CCDC144A	Homo sapiens	coiled-coil domain containing 144B; coiled-coil domain containing 144A; coiled-coil domain containing 144C
8155634	ZNF834	Homo sapiens	zinc finger protein 834
8024436	oaz1	Homo sapiens	ornithine decarboxylase antizyme 1
7917255	SSX2IP	Homo sapiens	synovial sarcoma, X breakpoint 2 interacting protein
7896247	DDX5	Homo sapiens	DEAD (Asp-Glu-Ala-Asp) box polypeptide 5
7896250	hnrnpm	Homo sapiens	heterogeneous nuclear ribonucleoprotein M
8107998	UQCRQ	Homo sapiens	ubiquinol-cytochrome c reductase, complex III subunit VII, 9.5kDa
8091283	PLOD2	Homo sapiens	procollagen-lysine, 2-oxoglutarate 5-dioxygenase 2
7976621	VRK1	Homo sapiens	vaccinia related kinase 1
8078319	ZCWPW2	Homo sapiens	zinc finger, CW type with PWWP domain 2
8118682	Phf1	Homo sapiens	PHD finger protein 1
7934870	ATAD1	Homo sapiens	ATPase family, AAA domain containing 1
8107996	RN5S10	Homo sapiens	RNA, 5S ribosomal 9; RNA, 5S ribosomal 13; RNA, 5S ribosomal 12; RNA, 5S ribosomal 11; RNA, 5S ribosomal 10; RNA, 5S ribosomal 17; RNA, 5S ribosomal 16; RNA, 5S ribosomal 15; RNA, 5S ribosomal 14; RNA, 5S ribosomal 1; RNA, 5S ribosomal 2; RNA, 5S ribosomal 3; RNA, 5S ribosomal 4; RNA, 5S ribosomal 5; RNA, 5S ribosomal 6; RNA, 5S ribosomal 7; RNA, 5S ribosomal 8
8107996	RN5S11	Homo sapiens	RNA, 5S ribosomal 9; RNA, 5S ribosomal 13; RNA, 5S ribosomal 12; RNA, 5S ribosomal 11; RNA, 5S ribosomal 10; RNA, 5S ribosomal 17; RNA, 5S ribosomal 16; RNA, 5S ribosomal 15; RNA, 5S ribosomal 14; RNA, 5S ribosomal 1; RNA, 5S ribosomal 2; RNA, 5S ribosomal 3; RNA, 5S ribosomal 4; RNA, 5S ribosomal 5; RNA, 5S ribosomal 6; RNA, 5S ribosomal 7; RNA, 5S ribosomal 8
8107996	RN5S12	Homo sapiens	RNA, 5S ribosomal 9; RNA, 5S ribosomal 13; RNA, 5S ribosomal 12; RNA, 5S ribosomal 11; RNA, 5S ribosomal 10; RNA, 5S ribosomal 17; RNA, 5S ribosomal 16; RNA, 5S ribosomal 15; RNA, 5S ribosomal 14; RNA, 5S ribosomal 1; RNA, 5S ribosomal 2; RNA, 5S ribosomal 3; RNA, 5S ribosomal 4; RNA, 5S ribosomal 5; RNA, 5S ribosomal 6; RNA, 5S ribosomal 7; RNA, 5S ribosomal 8
8107996	RN5S13	Homo sapiens	RNA, 5S ribosomal 9; RNA, 5S ribosomal 13; RNA, 5S ribosomal 12; RNA, 5S ribosomal 11; RNA, 5S ribosomal 10; RNA, 5S ribosomal 17; RNA, 5S ribosomal 16; RNA, 5S ribosomal 15; RNA, 5S ribosomal 14; RNA, 5S ribosomal 1; RNA, 5S ribosomal 2; RNA, 5S ribosomal 3; RNA, 5S ribosomal 4; RNA, 5S ribosomal 5; RNA, 5S ribosomal 6; RNA, 5S ribosomal 7; RNA, 5S ribosomal 8
8107996	RN5S14	Homo sapiens	RNA, 5S ribosomal 9; RNA, 5S ribosomal 13; RNA, 5S ribosomal 12; RNA, 5S ribosomal 11; RNA, 5S ribosomal 10; RNA, 5S ribosomal 17; RNA, 5S ribosomal 16; RNA, 5S ribosomal 15; RNA, 5S ribosomal 14; RNA, 5S ribosomal 1; RNA, 5S ribosomal 2; RNA, 5S ribosomal 3; RNA, 5S ribosomal 4; RNA, 5S ribosomal 5; RNA, 5S ribosomal 6; RNA, 5S ribosomal 7; RNA, 5S ribosomal 8
8107996	RN5S15	Homo sapiens	RNA, 5S ribosomal 9; RNA, 5S ribosomal 13; RNA, 5S ribosomal 12; RNA, 5S ribosomal 11; RNA, 5S ribosomal 10; RNA, 5S ribosomal 17; RNA, 5S ribosomal 16; RNA, 5S ribosomal 15; RNA, 5S ribosomal 14; RNA, 5S ribosomal 1; RNA, 5S ribosomal 2; RNA, 5S ribosomal 3; RNA, 5S ribosomal 4; RNA, 5S ribosomal 5; RNA, 5S ribosomal 6; RNA, 5S ribosomal 7; RNA, 5S ribosomal 8
8107996	RN5S16	Homo sapiens	RNA, 5S ribosomal 9; RNA, 5S ribosomal 13; RNA, 5S ribosomal 12; RNA, 5S ribosomal 11; RNA, 5S ribosomal 10; RNA, 5S ribosomal 17; RNA, 5S ribosomal 16; RNA, 5S ribosomal 15; RNA, 5S ribosomal 14; RNA, 5S ribosomal 1; RNA, 5S ribosomal 2; RNA, 5S ribosomal 3; RNA, 5S ribosomal 4; RNA, 5S ribosomal 5; RNA, 5S ribosomal 6; RNA, 5S ribosomal 7; RNA, 5S ribosomal 8
8107996	RN5S6	Homo sapiens	RNA, 5S ribosomal 9; RNA, 5S ribosomal 13; RNA, 5S ribosomal 12; RNA, 5S ribosomal 11; RNA, 5S ribosomal 10; RNA, 5S ribosomal 17; RNA, 5S ribosomal 16; RNA, 5S ribosomal 15; RNA, 5S ribosomal 14; RNA, 5S ribosomal 1; RNA, 5S ribosomal 2; RNA, 5S ribosomal 3; RNA, 5S ribosomal 4; RNA, 5S ribosomal 5; RNA, 5S ribosomal 6; RNA, 5S ribosomal 7; RNA, 5S ribosomal 8
8107996	RN5S7	Homo sapiens	RNA, 5S ribosomal 9; RNA, 5S ribosomal 13; RNA, 5S ribosomal 12; RNA, 5S ribosomal 11; RNA, 5S ribosomal 10; RNA, 5S ribosomal 17; RNA, 5S ribosomal 16; RNA, 5S ribosomal 15; RNA, 5S ribosomal 14; RNA, 5S ribosomal 1; RNA, 5S ribosomal 2; RNA, 5S ribosomal 3; RNA, 5S ribosomal 4; RNA, 5S ribosomal 5; RNA, 5S ribosomal 6; RNA, 5S ribosomal 7; RNA, 5S ribosomal 8
8107996	RN5S8	Homo sapiens	RNA, 5S ribosomal 9; RNA, 5S ribosomal 13; RNA, 5S ribosomal 12; RNA, 5S ribosomal 11; RNA, 5S ribosomal 10; RNA, 5S ribosomal 17; RNA, 5S ribosomal 16; RNA, 5S ribosomal 15; RNA, 5S ribosomal 14; RNA, 5S ribosomal 1; RNA, 5S ribosomal 2; RNA, 5S ribosomal 3; RNA, 5S ribosomal 4; RNA, 5S ribosomal 5; RNA, 5S ribosomal 6; RNA, 5S ribosomal 7; RNA, 5S ribosomal 8
8107996	RN5S9	Homo sapiens	RNA, 5S ribosomal 9; RNA, 5S ribosomal 13; RNA, 5S ribosomal 12; RNA, 5S ribosomal 11; RNA, 5S ribosomal 10; RNA, 5S ribosomal 17; RNA, 5S ribosomal 16; RNA, 5S ribosomal 15; RNA, 5S ribosomal 14; RNA, 5S ribosomal 1; RNA, 5S ribosomal 2; RNA, 5S ribosomal 3; RNA, 5S ribosomal 4; RNA, 5S ribosomal 5; RNA, 5S ribosomal 6; RNA, 5S ribosomal 7; RNA, 5S ribosomal 8
8107996	RN5S2	Homo sapiens	RNA, 5S ribosomal 9; RNA, 5S ribosomal 13; RNA, 5S ribosomal 12; RNA, 5S ribosomal 11; RNA, 5S ribosomal 10; RNA, 5S ribosomal 17; RNA, 5S ribosomal 16; RNA, 5S ribosomal 15; RNA, 5S ribosomal 14; RNA, 5S ribosomal 1; RNA, 5S ribosomal 2; RNA, 5S ribosomal 3; RNA, 5S ribosomal 4; RNA, 5S ribosomal 5; RNA, 5S ribosomal 6; RNA, 5S ribosomal 7; RNA, 5S ribosomal 8
8107996	RN5S3	Homo sapiens	RNA, 5S ribosomal 9; RNA, 5S ribosomal 13; RNA, 5S ribosomal 12; RNA, 5S ribosomal 11; RNA, 5S ribosomal 10; RNA, 5S ribosomal 17; RNA, 5S ribosomal 16; RNA, 5S ribosomal 15; RNA, 5S ribosomal 14; RNA, 5S ribosomal 1; RNA, 5S ribosomal 2; RNA, 5S ribosomal 3; RNA, 5S ribosomal 4; RNA, 5S ribosomal 5; RNA, 5S ribosomal 6; RNA, 5S ribosomal 7; RNA, 5S ribosomal 8
8107996	RN5S4	Homo sapiens	RNA, 5S ribosomal 9; RNA, 5S ribosomal 13; RNA, 5S ribosomal 12; RNA, 5S ribosomal 11; RNA, 5S ribosomal 10; RNA, 5S ribosomal 17; RNA, 5S ribosomal 16; RNA, 5S ribosomal 15; RNA, 5S ribosomal 14; RNA, 5S ribosomal 1; RNA, 5S ribosomal 2; RNA, 5S ribosomal 3; RNA, 5S ribosomal 4; RNA, 5S ribosomal 5; RNA, 5S ribosomal 6; RNA, 5S ribosomal 7; RNA, 5S ribosomal 8
8107996	RN5S5	Homo sapiens	RNA, 5S ribosomal 9; RNA, 5S ribosomal 13; RNA, 5S ribosomal 12; RNA, 5S ribosomal 11; RNA, 5S ribosomal 10; RNA, 5S ribosomal 17; RNA, 5S ribosomal 16; RNA, 5S ribosomal 15; RNA, 5S ribosomal 14; RNA, 5S ribosomal 1; RNA, 5S ribosomal 2; RNA, 5S ribosomal 3; RNA, 5S ribosomal 4; RNA, 5S ribosomal 5; RNA, 5S ribosomal 6; RNA, 5S ribosomal 7; RNA, 5S ribosomal 8
8107996	RN5S1	Homo sapiens	RNA, 5S ribosomal 9; RNA, 5S ribosomal 13; RNA, 5S ribosomal 12; RNA, 5S ribosomal 11; RNA, 5S ribosomal 10; RNA, 5S ribosomal 17; RNA, 5S ribosomal 16; RNA, 5S ribosomal 15; RNA, 5S ribosomal 14; RNA, 5S ribosomal 1; RNA, 5S ribosomal 2; RNA, 5S ribosomal 3; RNA, 5S ribosomal 4; RNA, 5S ribosomal 5; RNA, 5S ribosomal 6; RNA, 5S ribosomal 7; RNA, 5S ribosomal 8
8107996	RN5S17	Homo sapiens	RNA, 5S ribosomal 9; RNA, 5S ribosomal 13; RNA, 5S ribosomal 12; RNA, 5S ribosomal 11; RNA, 5S ribosomal 10; RNA, 5S ribosomal 17; RNA, 5S ribosomal 16; RNA, 5S ribosomal 15; RNA, 5S ribosomal 14; RNA, 5S ribosomal 1; RNA, 5S ribosomal 2; RNA, 5S ribosomal 3; RNA, 5S ribosomal 4; RNA, 5S ribosomal 5; RNA, 5S ribosomal 6; RNA, 5S ribosomal 7; RNA, 5S ribosomal 8
8122701	SNORA2A	Homo sapiens	small nucleolar RNA, H/ACA box 2A; small nucleolar RNA, H/ACA box 2B
8122701	SNORA2B	Homo sapiens	small nucleolar RNA, H/ACA box 2A; small nucleolar RNA, H/ACA box 2B
8121649	Rfx6	Homo sapiens	regulatory factor X, 6
7972979	LOC100132785	Homo sapiens	similar to hCG1644292
8092321	DCUN1D1	Homo sapiens	DCN1, defective in cullin neddylation 1, domain containing 1 (S. cerevisiae)
8150034	RN5S10	Homo sapiens	RNA, 5S ribosomal 9; RNA, 5S ribosomal 13; RNA, 5S ribosomal 12; RNA, 5S ribosomal 11; RNA, 5S ribosomal 10; RNA, 5S ribosomal 17; RNA, 5S ribosomal 16; RNA, 5S ribosomal 15; RNA, 5S ribosomal 14; RNA, 5S ribosomal 1; RNA, 5S ribosomal 2; RNA, 5S ribosomal 3; RNA, 5S ribosomal 4; RNA, 5S ribosomal 5; RNA, 5S ribosomal 6; RNA, 5S ribosomal 7; RNA, 5S ribosomal 8
8150034	RN5S11	Homo sapiens	RNA, 5S ribosomal 9; RNA, 5S ribosomal 13; RNA, 5S ribosomal 12; RNA, 5S ribosomal 11; RNA, 5S ribosomal 10; RNA, 5S ribosomal 17; RNA, 5S ribosomal 16; RNA, 5S ribosomal 15; RNA, 5S ribosomal 14; RNA, 5S ribosomal 1; RNA, 5S ribosomal 2; RNA, 5S ribosomal 3; RNA, 5S ribosomal 4; RNA, 5S ribosomal 5; RNA, 5S ribosomal 6; RNA, 5S ribosomal 7; RNA, 5S ribosomal 8
8150034	RN5S12	Homo sapiens	RNA, 5S ribosomal 9; RNA, 5S ribosomal 13; RNA, 5S ribosomal 12; RNA, 5S ribosomal 11; RNA, 5S ribosomal 10; RNA, 5S ribosomal 17; RNA, 5S ribosomal 16; RNA, 5S ribosomal 15; RNA, 5S ribosomal 14; RNA, 5S ribosomal 1; RNA, 5S ribosomal 2; RNA, 5S ribosomal 3; RNA, 5S ribosomal 4; RNA, 5S ribosomal 5; RNA, 5S ribosomal 6; RNA, 5S ribosomal 7; RNA, 5S ribosomal 8
8150034	RN5S13	Homo sapiens	RNA, 5S ribosomal 9; RNA, 5S ribosomal 13; RNA, 5S ribosomal 12; RNA, 5S ribosomal 11; RNA, 5S ribosomal 10; RNA, 5S ribosomal 17; RNA, 5S ribosomal 16; RNA, 5S ribosomal 15; RNA, 5S ribosomal 14; RNA, 5S ribosomal 1; RNA, 5S ribosomal 2; RNA, 5S ribosomal 3; RNA, 5S ribosomal 4; RNA, 5S ribosomal 5; RNA, 5S ribosomal 6; RNA, 5S ribosomal 7; RNA, 5S ribosomal 8
8150034	RN5S14	Homo sapiens	RNA, 5S ribosomal 9; RNA, 5S ribosomal 13; RNA, 5S ribosomal 12; RNA, 5S ribosomal 11; RNA, 5S ribosomal 10; RNA, 5S ribosomal 17; RNA, 5S ribosomal 16; RNA, 5S ribosomal 15; RNA, 5S ribosomal 14; RNA, 5S ribosomal 1; RNA, 5S ribosomal 2; RNA, 5S ribosomal 3; RNA, 5S ribosomal 4; RNA, 5S ribosomal 5; RNA, 5S ribosomal 6; RNA, 5S ribosomal 7; RNA, 5S ribosomal 8
8150034	RN5S15	Homo sapiens	RNA, 5S ribosomal 9; RNA, 5S ribosomal 13; RNA, 5S ribosomal 12; RNA, 5S ribosomal 11; RNA, 5S ribosomal 10; RNA, 5S ribosomal 17; RNA, 5S ribosomal 16; RNA, 5S ribosomal 15; RNA, 5S ribosomal 14; RNA, 5S ribosomal 1; RNA, 5S ribosomal 2; RNA, 5S ribosomal 3; RNA, 5S ribosomal 4; RNA, 5S ribosomal 5; RNA, 5S ribosomal 6; RNA, 5S ribosomal 7; RNA, 5S ribosomal 8
8150034	RN5S16	Homo sapiens	RNA, 5S ribosomal 9; RNA, 5S ribosomal 13; RNA, 5S ribosomal 12; RNA, 5S ribosomal 11; RNA, 5S ribosomal 10; RNA, 5S ribosomal 17; RNA, 5S ribosomal 16; RNA, 5S ribosomal 15; RNA, 5S ribosomal 14; RNA, 5S ribosomal 1; RNA, 5S ribosomal 2; RNA, 5S ribosomal 3; RNA, 5S ribosomal 4; RNA, 5S ribosomal 5; RNA, 5S ribosomal 6; RNA, 5S ribosomal 7; RNA, 5S ribosomal 8
8150034	RN5S6	Homo sapiens	RNA, 5S ribosomal 9; RNA, 5S ribosomal 13; RNA, 5S ribosomal 12; RNA, 5S ribosomal 11; RNA, 5S ribosomal 10; RNA, 5S ribosomal 17; RNA, 5S ribosomal 16; RNA, 5S ribosomal 15; RNA, 5S ribosomal 14; RNA, 5S ribosomal 1; RNA, 5S ribosomal 2; RNA, 5S ribosomal 3; RNA, 5S ribosomal 4; RNA, 5S ribosomal 5; RNA, 5S ribosomal 6; RNA, 5S ribosomal 7; RNA, 5S ribosomal 8
8150034	RN5S7	Homo sapiens	RNA, 5S ribosomal 9; RNA, 5S ribosomal 13; RNA, 5S ribosomal 12; RNA, 5S ribosomal 11; RNA, 5S ribosomal 10; RNA, 5S ribosomal 17; RNA, 5S ribosomal 16; RNA, 5S ribosomal 15; RNA, 5S ribosomal 14; RNA, 5S ribosomal 1; RNA, 5S ribosomal 2; RNA, 5S ribosomal 3; RNA, 5S ribosomal 4; RNA, 5S ribosomal 5; RNA, 5S ribosomal 6; RNA, 5S ribosomal 7; RNA, 5S ribosomal 8
8150034	RN5S8	Homo sapiens	RNA, 5S ribosomal 9; RNA, 5S ribosomal 13; RNA, 5S ribosomal 12; RNA, 5S ribosomal 11; RNA, 5S ribosomal 10; RNA, 5S ribosomal 17; RNA, 5S ribosomal 16; RNA, 5S ribosomal 15; RNA, 5S ribosomal 14; RNA, 5S ribosomal 1; RNA, 5S ribosomal 2; RNA, 5S ribosomal 3; RNA, 5S ribosomal 4; RNA, 5S ribosomal 5; RNA, 5S ribosomal 6; RNA, 5S ribosomal 7; RNA, 5S ribosomal 8
8150034	RN5S9	Homo sapiens	RNA, 5S ribosomal 9; RNA, 5S ribosomal 13; RNA, 5S ribosomal 12; RNA, 5S ribosomal 11; RNA, 5S ribosomal 10; RNA, 5S ribosomal 17; RNA, 5S ribosomal 16; RNA, 5S ribosomal 15; RNA, 5S ribosomal 14; RNA, 5S ribosomal 1; RNA, 5S ribosomal 2; RNA, 5S ribosomal 3; RNA, 5S ribosomal 4; RNA, 5S ribosomal 5; RNA, 5S ribosomal 6; RNA, 5S ribosomal 7; RNA, 5S ribosomal 8
8150034	RN5S2	Homo sapiens	RNA, 5S ribosomal 9; RNA, 5S ribosomal 13; RNA, 5S ribosomal 12; RNA, 5S ribosomal 11; RNA, 5S ribosomal 10; RNA, 5S ribosomal 17; RNA, 5S ribosomal 16; RNA, 5S ribosomal 15; RNA, 5S ribosomal 14; RNA, 5S ribosomal 1; RNA, 5S ribosomal 2; RNA, 5S ribosomal 3; RNA, 5S ribosomal 4; RNA, 5S ribosomal 5; RNA, 5S ribosomal 6; RNA, 5S ribosomal 7; RNA, 5S ribosomal 8
8150034	RN5S3	Homo sapiens	RNA, 5S ribosomal 9; RNA, 5S ribosomal 13; RNA, 5S ribosomal 12; RNA, 5S ribosomal 11; RNA, 5S ribosomal 10; RNA, 5S ribosomal 17; RNA, 5S ribosomal 16; RNA, 5S ribosomal 15; RNA, 5S ribosomal 14; RNA, 5S ribosomal 1; RNA, 5S ribosomal 2; RNA, 5S ribosomal 3; RNA, 5S ribosomal 4; RNA, 5S ribosomal 5; RNA, 5S ribosomal 6; RNA, 5S ribosomal 7; RNA, 5S ribosomal 8
8150034	RN5S4	Homo sapiens	RNA, 5S ribosomal 9; RNA, 5S ribosomal 13; RNA, 5S ribosomal 12; RNA, 5S ribosomal 11; RNA, 5S ribosomal 10; RNA, 5S ribosomal 17; RNA, 5S ribosomal 16; RNA, 5S ribosomal 15; RNA, 5S ribosomal 14; RNA, 5S ribosomal 1; RNA, 5S ribosomal 2; RNA, 5S ribosomal 3; RNA, 5S ribosomal 4; RNA, 5S ribosomal 5; RNA, 5S ribosomal 6; RNA, 5S ribosomal 7; RNA, 5S ribosomal 8
8150034	RN5S5	Homo sapiens	RNA, 5S ribosomal 9; RNA, 5S ribosomal 13; RNA, 5S ribosomal 12; RNA, 5S ribosomal 11; RNA, 5S ribosomal 10; RNA, 5S ribosomal 17; RNA, 5S ribosomal 16; RNA, 5S ribosomal 15; RNA, 5S ribosomal 14; RNA, 5S ribosomal 1; RNA, 5S ribosomal 2; RNA, 5S ribosomal 3; RNA, 5S ribosomal 4; RNA, 5S ribosomal 5; RNA, 5S ribosomal 6; RNA, 5S ribosomal 7; RNA, 5S ribosomal 8
8150034	RN5S1	Homo sapiens	RNA, 5S ribosomal 9; RNA, 5S ribosomal 13; RNA, 5S ribosomal 12; RNA, 5S ribosomal 11; RNA, 5S ribosomal 10; RNA, 5S ribosomal 17; RNA, 5S ribosomal 16; RNA, 5S ribosomal 15; RNA, 5S ribosomal 14; RNA, 5S ribosomal 1; RNA, 5S ribosomal 2; RNA, 5S ribosomal 3; RNA, 5S ribosomal 4; RNA, 5S ribosomal 5; RNA, 5S ribosomal 6; RNA, 5S ribosomal 7; RNA, 5S ribosomal 8
8150034	RN5S17	Homo sapiens	RNA, 5S ribosomal 9; RNA, 5S ribosomal 13; RNA, 5S ribosomal 12; RNA, 5S ribosomal 11; RNA, 5S ribosomal 10; RNA, 5S ribosomal 17; RNA, 5S ribosomal 16; RNA, 5S ribosomal 15; RNA, 5S ribosomal 14; RNA, 5S ribosomal 1; RNA, 5S ribosomal 2; RNA, 5S ribosomal 3; RNA, 5S ribosomal 4; RNA, 5S ribosomal 5; RNA, 5S ribosomal 6; RNA, 5S ribosomal 7; RNA, 5S ribosomal 8
7896258	capns1	Homo sapiens	calpain, small subunit 1
7962479	RNY4P7	Homo sapiens	hypothetical LOC100271832; RNA, Ro-associated Y5 pseudogene 10; RNA, Ro-associated Y1; RNA, Ro-associated Y4 pseudogene 7; RNA, Ro-associated Y4 pseudogene 19; RNA, Ro-associated Y3; hypothetical LOC100132111; RNA, Ro-associated Y4
7962479	LOC100271832	Homo sapiens	hypothetical LOC100271832; RNA, Ro-associated Y5 pseudogene 10; RNA, Ro-associated Y1; RNA, Ro-associated Y4 pseudogene 7; RNA, Ro-associated Y4 pseudogene 19; RNA, Ro-associated Y3; hypothetical LOC100132111; RNA, Ro-associated Y4
7962479	RNY5P10	Homo sapiens	hypothetical LOC100271832; RNA, Ro-associated Y5 pseudogene 10; RNA, Ro-associated Y1; RNA, Ro-associated Y4 pseudogene 7; RNA, Ro-associated Y4 pseudogene 19; RNA, Ro-associated Y3; hypothetical LOC100132111; RNA, Ro-associated Y4
7962479	RNY1	Homo sapiens	hypothetical LOC100271832; RNA, Ro-associated Y5 pseudogene 10; RNA, Ro-associated Y1; RNA, Ro-associated Y4 pseudogene 7; RNA, Ro-associated Y4 pseudogene 19; RNA, Ro-associated Y3; hypothetical LOC100132111; RNA, Ro-associated Y4
7962479	LOC100132111	Homo sapiens	hypothetical LOC100271832; RNA, Ro-associated Y5 pseudogene 10; RNA, Ro-associated Y1; RNA, Ro-associated Y4 pseudogene 7; RNA, Ro-associated Y4 pseudogene 19; RNA, Ro-associated Y3; hypothetical LOC100132111; RNA, Ro-associated Y4
7962479	RNY4P19	Homo sapiens	hypothetical LOC100271832; RNA, Ro-associated Y5 pseudogene 10; RNA, Ro-associated Y1; RNA, Ro-associated Y4 pseudogene 7; RNA, Ro-associated Y4 pseudogene 19; RNA, Ro-associated Y3; hypothetical LOC100132111; RNA, Ro-associated Y4
7962479	RNY3	Homo sapiens	hypothetical LOC100271832; RNA, Ro-associated Y5 pseudogene 10; RNA, Ro-associated Y1; RNA, Ro-associated Y4 pseudogene 7; RNA, Ro-associated Y4 pseudogene 19; RNA, Ro-associated Y3; hypothetical LOC100132111; RNA, Ro-associated Y4
7962479	RNY4	Homo sapiens	hypothetical LOC100271832; RNA, Ro-associated Y5 pseudogene 10; RNA, Ro-associated Y1; RNA, Ro-associated Y4 pseudogene 7; RNA, Ro-associated Y4 pseudogene 19; RNA, Ro-associated Y3; hypothetical LOC100132111; RNA, Ro-associated Y4
7896253	rpl14	Homo sapiens	ribosomal protein L14
7954206	RNY4P7	Homo sapiens	hypothetical LOC100271832; RNA, Ro-associated Y5 pseudogene 10; RNA, Ro-associated Y1; RNA, Ro-associated Y4 pseudogene 7; RNA, Ro-associated Y4 pseudogene 19; RNA, Ro-associated Y3; hypothetical LOC100132111; RNA, Ro-associated Y4
7954206	LOC100271832	Homo sapiens	hypothetical LOC100271832; RNA, Ro-associated Y5 pseudogene 10; RNA, Ro-associated Y1; RNA, Ro-associated Y4 pseudogene 7; RNA, Ro-associated Y4 pseudogene 19; RNA, Ro-associated Y3; hypothetical LOC100132111; RNA, Ro-associated Y4
7954206	RNY5P10	Homo sapiens	hypothetical LOC100271832; RNA, Ro-associated Y5 pseudogene 10; RNA, Ro-associated Y1; RNA, Ro-associated Y4 pseudogene 7; RNA, Ro-associated Y4 pseudogene 19; RNA, Ro-associated Y3; hypothetical LOC100132111; RNA, Ro-associated Y4
7954206	RNY1	Homo sapiens	hypothetical LOC100271832; RNA, Ro-associated Y5 pseudogene 10; RNA, Ro-associated Y1; RNA, Ro-associated Y4 pseudogene 7; RNA, Ro-associated Y4 pseudogene 19; RNA, Ro-associated Y3; hypothetical LOC100132111; RNA, Ro-associated Y4
7954206	LOC100132111	Homo sapiens	hypothetical LOC100271832; RNA, Ro-associated Y5 pseudogene 10; RNA, Ro-associated Y1; RNA, Ro-associated Y4 pseudogene 7; RNA, Ro-associated Y4 pseudogene 19; RNA, Ro-associated Y3; hypothetical LOC100132111; RNA, Ro-associated Y4
7954206	RNY4P19	Homo sapiens	hypothetical LOC100271832; RNA, Ro-associated Y5 pseudogene 10; RNA, Ro-associated Y1; RNA, Ro-associated Y4 pseudogene 7; RNA, Ro-associated Y4 pseudogene 19; RNA, Ro-associated Y3; hypothetical LOC100132111; RNA, Ro-associated Y4
7954206	RNY3	Homo sapiens	hypothetical LOC100271832; RNA, Ro-associated Y5 pseudogene 10; RNA, Ro-associated Y1; RNA, Ro-associated Y4 pseudogene 7; RNA, Ro-associated Y4 pseudogene 19; RNA, Ro-associated Y3; hypothetical LOC100132111; RNA, Ro-associated Y4
7954206	RNY4	Homo sapiens	hypothetical LOC100271832; RNA, Ro-associated Y5 pseudogene 10; RNA, Ro-associated Y1; RNA, Ro-associated Y4 pseudogene 7; RNA, Ro-associated Y4 pseudogene 19; RNA, Ro-associated Y3; hypothetical LOC100132111; RNA, Ro-associated Y4
7893363	CCDC84	Homo sapiens	coiled-coil domain containing 84
7894496	eif3d	Homo sapiens	eukaryotic translation initiation factor 3, subunit D
8005223	RN7SL1	Homo sapiens	RNA, 7SL, cytoplasmic 2; RNA, 7SL, cytoplasmic 1
8005223	RN7SL2	Homo sapiens	RNA, 7SL, cytoplasmic 2; RNA, 7SL, cytoplasmic 1
8007483	TMEM106A	Homo sapiens	hypothetical LOC728772; transmembrane protein 106A
8007483	FLJ77644	Homo sapiens	hypothetical LOC728772; transmembrane protein 106A
7896651	psmb2	Homo sapiens	proteasome (prosome, macropain) subunit, beta type, 2
8098193	RNU4-2	Homo sapiens	RNA, U4 small nuclear 2; RNA, U4 small nuclear 1; RNA, U4 small nuclear 1B
8098193	RNU4-1	Homo sapiens	RNA, U4 small nuclear 2; RNA, U4 small nuclear 1; RNA, U4 small nuclear 1B
8098193	RNU4-1B	Homo sapiens	RNA, U4 small nuclear 2; RNA, U4 small nuclear 1; RNA, U4 small nuclear 1B
7896653	DAD1	Homo sapiens	defender against cell death 1
8083968	nlgn1	Homo sapiens	neuroligin 1
7988687	gabpb1	Homo sapiens	GA binding protein transcription factor, beta subunit 1
8027254	ZNF90	Homo sapiens	zinc finger protein 90
8161415	ANKRD20B	Homo sapiens	ankyrin repeat domain 20 family, member A2 pseudogene; ankyrin repeat domain 20B; ankyrin repeat domain 20 family, member A4
8161415	ANKRD20A4	Homo sapiens	ankyrin repeat domain 20 family, member A2 pseudogene; ankyrin repeat domain 20B; ankyrin repeat domain 20 family, member A4
8161415	LOC284232	Homo sapiens	ankyrin repeat domain 20 family, member A2 pseudogene; ankyrin repeat domain 20B; ankyrin repeat domain 20 family, member A4
8156253	Fam75a4	Homo sapiens	family with sequence similarity 75, member A4
7893357	nonO	Homo sapiens	non-POU domain containing, octamer-binding
7950269	RNU6-2	Homo sapiens	RNA, U6 small nuclear 2; RNA, U6 small nuclear 1
7950269	RNU6-1	Homo sapiens	RNA, U6 small nuclear 2; RNA, U6 small nuclear 1
8151684	mmp16	Homo sapiens	matrix metallopeptidase 16 (membrane-inserted)
7922823	edem3	Homo sapiens	ER degradation enhancer, mannosidase alpha-like 3
7925318	RNU5A	Homo sapiens	RNA, U5E small nuclear; RNA, U5A small nuclear; RNA, U5F small nuclear; RNA, U5B small nuclear 1; RNA, U5D small nuclear
7925318	RNU5B-1	Homo sapiens	RNA, U5E small nuclear; RNA, U5A small nuclear; RNA, U5F small nuclear; RNA, U5B small nuclear 1; RNA, U5D small nuclear
7925318	RNU5F	Homo sapiens	RNA, U5E small nuclear; RNA, U5A small nuclear; RNA, U5F small nuclear; RNA, U5B small nuclear 1; RNA, U5D small nuclear
7925318	RNU5E	Homo sapiens	RNA, U5E small nuclear; RNA, U5A small nuclear; RNA, U5F small nuclear; RNA, U5B small nuclear 1; RNA, U5D small nuclear
7925318	RNU5D	Homo sapiens	RNA, U5E small nuclear; RNA, U5A small nuclear; RNA, U5F small nuclear; RNA, U5B small nuclear 1; RNA, U5D small nuclear
7893354	nonO	Homo sapiens	non-POU domain containing, octamer-binding
7896605	snx3	Homo sapiens	sorting nexin 3
7933405	AGAP7	Homo sapiens	ArfGAP with GTPase domain, ankyrin repeat and PH domain 7
8017133	SKA2	Homo sapiens	family with sequence similarity 33, member A; similar to Spindle and kinetochore-associated protein 2
8017139	MIR301A	Homo sapiens	microRNA 301a
8095301	RNU6-2	Homo sapiens	RNA, U6 small nuclear 2; RNA, U6 small nuclear 1
8095301	RNU6-1	Homo sapiens	RNA, U6 small nuclear 2; RNA, U6 small nuclear 1
7893345	Canx	Homo sapiens	calnexin
7989387	Vps13c	Homo sapiens	vacuolar protein sorting 13 homolog C (S. cerevisiae)
7893349	SMNDC1	Homo sapiens	survival motor neuron domain containing 1
8118634	RING1	Homo sapiens	ring finger protein 1
8133314	NCF1C	Homo sapiens	neutrophil cytosolic factor 1; neutrophil cytosolic factor 1C pseudogene
8133314	ncf1	Homo sapiens	neutrophil cytosolic factor 1; neutrophil cytosolic factor 1C pseudogene
7893340	RPL24P2	Homo sapiens	ribosomal protein L24 pseudogene 2
8097435	c4orf33	Homo sapiens	chromosome 4 open reading frame 33
8062693	RNU6-2	Homo sapiens	RNA, U6 small nuclear 2; RNA, U6 small nuclear 1
8062693	RNU6-1	Homo sapiens	RNA, U6 small nuclear 2; RNA, U6 small nuclear 1
7948679	EEF1G	Homo sapiens	eukaryotic translation elongation factor 1 gamma
7961418	RN5S10	Homo sapiens	RNA, 5S ribosomal 9; RNA, 5S ribosomal 13; RNA, 5S ribosomal 12; RNA, 5S ribosomal 11; RNA, 5S ribosomal 10; RNA, 5S ribosomal 17; RNA, 5S ribosomal 16; RNA, 5S ribosomal 15; RNA, 5S ribosomal 14; RNA, 5S ribosomal 1; RNA, 5S ribosomal 2; RNA, 5S ribosomal 3; RNA, 5S ribosomal 4; RNA, 5S ribosomal 5; RNA, 5S ribosomal 6; RNA, 5S ribosomal 7; RNA, 5S ribosomal 8
7961418	RN5S11	Homo sapiens	RNA, 5S ribosomal 9; RNA, 5S ribosomal 13; RNA, 5S ribosomal 12; RNA, 5S ribosomal 11; RNA, 5S ribosomal 10; RNA, 5S ribosomal 17; RNA, 5S ribosomal 16; RNA, 5S ribosomal 15; RNA, 5S ribosomal 14; RNA, 5S ribosomal 1; RNA, 5S ribosomal 2; RNA, 5S ribosomal 3; RNA, 5S ribosomal 4; RNA, 5S ribosomal 5; RNA, 5S ribosomal 6; RNA, 5S ribosomal 7; RNA, 5S ribosomal 8
7961418	RN5S12	Homo sapiens	RNA, 5S ribosomal 9; RNA, 5S ribosomal 13; RNA, 5S ribosomal 12; RNA, 5S ribosomal 11; RNA, 5S ribosomal 10; RNA, 5S ribosomal 17; RNA, 5S ribosomal 16; RNA, 5S ribosomal 15; RNA, 5S ribosomal 14; RNA, 5S ribosomal 1; RNA, 5S ribosomal 2; RNA, 5S ribosomal 3; RNA, 5S ribosomal 4; RNA, 5S ribosomal 5; RNA, 5S ribosomal 6; RNA, 5S ribosomal 7; RNA, 5S ribosomal 8
7961418	RN5S13	Homo sapiens	RNA, 5S ribosomal 9; RNA, 5S ribosomal 13; RNA, 5S ribosomal 12; RNA, 5S ribosomal 11; RNA, 5S ribosomal 10; RNA, 5S ribosomal 17; RNA, 5S ribosomal 16; RNA, 5S ribosomal 15; RNA, 5S ribosomal 14; RNA, 5S ribosomal 1; RNA, 5S ribosomal 2; RNA, 5S ribosomal 3; RNA, 5S ribosomal 4; RNA, 5S ribosomal 5; RNA, 5S ribosomal 6; RNA, 5S ribosomal 7; RNA, 5S ribosomal 8
7961418	RN5S14	Homo sapiens	RNA, 5S ribosomal 9; RNA, 5S ribosomal 13; RNA, 5S ribosomal 12; RNA, 5S ribosomal 11; RNA, 5S ribosomal 10; RNA, 5S ribosomal 17; RNA, 5S ribosomal 16; RNA, 5S ribosomal 15; RNA, 5S ribosomal 14; RNA, 5S ribosomal 1; RNA, 5S ribosomal 2; RNA, 5S ribosomal 3; RNA, 5S ribosomal 4; RNA, 5S ribosomal 5; RNA, 5S ribosomal 6; RNA, 5S ribosomal 7; RNA, 5S ribosomal 8
7961418	RN5S15	Homo sapiens	RNA, 5S ribosomal 9; RNA, 5S ribosomal 13; RNA, 5S ribosomal 12; RNA, 5S ribosomal 11; RNA, 5S ribosomal 10; RNA, 5S ribosomal 17; RNA, 5S ribosomal 16; RNA, 5S ribosomal 15; RNA, 5S ribosomal 14; RNA, 5S ribosomal 1; RNA, 5S ribosomal 2; RNA, 5S ribosomal 3; RNA, 5S ribosomal 4; RNA, 5S ribosomal 5; RNA, 5S ribosomal 6; RNA, 5S ribosomal 7; RNA, 5S ribosomal 8
7961418	RN5S16	Homo sapiens	RNA, 5S ribosomal 9; RNA, 5S ribosomal 13; RNA, 5S ribosomal 12; RNA, 5S ribosomal 11; RNA, 5S ribosomal 10; RNA, 5S ribosomal 17; RNA, 5S ribosomal 16; RNA, 5S ribosomal 15; RNA, 5S ribosomal 14; RNA, 5S ribosomal 1; RNA, 5S ribosomal 2; RNA, 5S ribosomal 3; RNA, 5S ribosomal 4; RNA, 5S ribosomal 5; RNA, 5S ribosomal 6; RNA, 5S ribosomal 7; RNA, 5S ribosomal 8
7961418	RN5S6	Homo sapiens	RNA, 5S ribosomal 9; RNA, 5S ribosomal 13; RNA, 5S ribosomal 12; RNA, 5S ribosomal 11; RNA, 5S ribosomal 10; RNA, 5S ribosomal 17; RNA, 5S ribosomal 16; RNA, 5S ribosomal 15; RNA, 5S ribosomal 14; RNA, 5S ribosomal 1; RNA, 5S ribosomal 2; RNA, 5S ribosomal 3; RNA, 5S ribosomal 4; RNA, 5S ribosomal 5; RNA, 5S ribosomal 6; RNA, 5S ribosomal 7; RNA, 5S ribosomal 8
7961418	RN5S7	Homo sapiens	RNA, 5S ribosomal 9; RNA, 5S ribosomal 13; RNA, 5S ribosomal 12; RNA, 5S ribosomal 11; RNA, 5S ribosomal 10; RNA, 5S ribosomal 17; RNA, 5S ribosomal 16; RNA, 5S ribosomal 15; RNA, 5S ribosomal 14; RNA, 5S ribosomal 1; RNA, 5S ribosomal 2; RNA, 5S ribosomal 3; RNA, 5S ribosomal 4; RNA, 5S ribosomal 5; RNA, 5S ribosomal 6; RNA, 5S ribosomal 7; RNA, 5S ribosomal 8
7961418	RN5S8	Homo sapiens	RNA, 5S ribosomal 9; RNA, 5S ribosomal 13; RNA, 5S ribosomal 12; RNA, 5S ribosomal 11; RNA, 5S ribosomal 10; RNA, 5S ribosomal 17; RNA, 5S ribosomal 16; RNA, 5S ribosomal 15; RNA, 5S ribosomal 14; RNA, 5S ribosomal 1; RNA, 5S ribosomal 2; RNA, 5S ribosomal 3; RNA, 5S ribosomal 4; RNA, 5S ribosomal 5; RNA, 5S ribosomal 6; RNA, 5S ribosomal 7; RNA, 5S ribosomal 8
7961418	RN5S9	Homo sapiens	RNA, 5S ribosomal 9; RNA, 5S ribosomal 13; RNA, 5S ribosomal 12; RNA, 5S ribosomal 11; RNA, 5S ribosomal 10; RNA, 5S ribosomal 17; RNA, 5S ribosomal 16; RNA, 5S ribosomal 15; RNA, 5S ribosomal 14; RNA, 5S ribosomal 1; RNA, 5S ribosomal 2; RNA, 5S ribosomal 3; RNA, 5S ribosomal 4; RNA, 5S ribosomal 5; RNA, 5S ribosomal 6; RNA, 5S ribosomal 7; RNA, 5S ribosomal 8
7961418	RN5S2	Homo sapiens	RNA, 5S ribosomal 9; RNA, 5S ribosomal 13; RNA, 5S ribosomal 12; RNA, 5S ribosomal 11; RNA, 5S ribosomal 10; RNA, 5S ribosomal 17; RNA, 5S ribosomal 16; RNA, 5S ribosomal 15; RNA, 5S ribosomal 14; RNA, 5S ribosomal 1; RNA, 5S ribosomal 2; RNA, 5S ribosomal 3; RNA, 5S ribosomal 4; RNA, 5S ribosomal 5; RNA, 5S ribosomal 6; RNA, 5S ribosomal 7; RNA, 5S ribosomal 8
7961418	RN5S3	Homo sapiens	RNA, 5S ribosomal 9; RNA, 5S ribosomal 13; RNA, 5S ribosomal 12; RNA, 5S ribosomal 11; RNA, 5S ribosomal 10; RNA, 5S ribosomal 17; RNA, 5S ribosomal 16; RNA, 5S ribosomal 15; RNA, 5S ribosomal 14; RNA, 5S ribosomal 1; RNA, 5S ribosomal 2; RNA, 5S ribosomal 3; RNA, 5S ribosomal 4; RNA, 5S ribosomal 5; RNA, 5S ribosomal 6; RNA, 5S ribosomal 7; RNA, 5S ribosomal 8
7961418	RN5S4	Homo sapiens	RNA, 5S ribosomal 9; RNA, 5S ribosomal 13; RNA, 5S ribosomal 12; RNA, 5S ribosomal 11; RNA, 5S ribosomal 10; RNA, 5S ribosomal 17; RNA, 5S ribosomal 16; RNA, 5S ribosomal 15; RNA, 5S ribosomal 14; RNA, 5S ribosomal 1; RNA, 5S ribosomal 2; RNA, 5S ribosomal 3; RNA, 5S ribosomal 4; RNA, 5S ribosomal 5; RNA, 5S ribosomal 6; RNA, 5S ribosomal 7; RNA, 5S ribosomal 8
7961418	RN5S5	Homo sapiens	RNA, 5S ribosomal 9; RNA, 5S ribosomal 13; RNA, 5S ribosomal 12; RNA, 5S ribosomal 11; RNA, 5S ribosomal 10; RNA, 5S ribosomal 17; RNA, 5S ribosomal 16; RNA, 5S ribosomal 15; RNA, 5S ribosomal 14; RNA, 5S ribosomal 1; RNA, 5S ribosomal 2; RNA, 5S ribosomal 3; RNA, 5S ribosomal 4; RNA, 5S ribosomal 5; RNA, 5S ribosomal 6; RNA, 5S ribosomal 7; RNA, 5S ribosomal 8
7961418	RN5S1	Homo sapiens	RNA, 5S ribosomal 9; RNA, 5S ribosomal 13; RNA, 5S ribosomal 12; RNA, 5S ribosomal 11; RNA, 5S ribosomal 10; RNA, 5S ribosomal 17; RNA, 5S ribosomal 16; RNA, 5S ribosomal 15; RNA, 5S ribosomal 14; RNA, 5S ribosomal 1; RNA, 5S ribosomal 2; RNA, 5S ribosomal 3; RNA, 5S ribosomal 4; RNA, 5S ribosomal 5; RNA, 5S ribosomal 6; RNA, 5S ribosomal 7; RNA, 5S ribosomal 8
7961418	RN5S17	Homo sapiens	RNA, 5S ribosomal 9; RNA, 5S ribosomal 13; RNA, 5S ribosomal 12; RNA, 5S ribosomal 11; RNA, 5S ribosomal 10; RNA, 5S ribosomal 17; RNA, 5S ribosomal 16; RNA, 5S ribosomal 15; RNA, 5S ribosomal 14; RNA, 5S ribosomal 1; RNA, 5S ribosomal 2; RNA, 5S ribosomal 3; RNA, 5S ribosomal 4; RNA, 5S ribosomal 5; RNA, 5S ribosomal 6; RNA, 5S ribosomal 7; RNA, 5S ribosomal 8
7896621	Fau	Homo sapiens	Finkel-Biskis-Reilly murine sarcoma virus (FBR-MuSV) ubiquitously expressed
8098163	RNU6-2	Homo sapiens	RNA, U6 small nuclear 2; RNA, U6 small nuclear 1
8098163	RNU6-1	Homo sapiens	RNA, U6 small nuclear 2; RNA, U6 small nuclear 1
8129273	c6orf170	Homo sapiens	chromosome 6 open reading frame 170
8086148	RPL29P11	Homo sapiens	ribosomal protein L29 pseudogene 9; ribosomal protein L29 pseudogene 12; ribosomal protein L29 pseudogene 11; ribosomal protein L29; ribosomal protein L29 pseudogene 26
8086148	RPL29P9	Homo sapiens	ribosomal protein L29 pseudogene 9; ribosomal protein L29 pseudogene 12; ribosomal protein L29 pseudogene 11; ribosomal protein L29; ribosomal protein L29 pseudogene 26
8086148	RPL29P26	Homo sapiens	ribosomal protein L29 pseudogene 9; ribosomal protein L29 pseudogene 12; ribosomal protein L29 pseudogene 11; ribosomal protein L29; ribosomal protein L29 pseudogene 26
8086148	rpl29	Homo sapiens	ribosomal protein L29 pseudogene 9; ribosomal protein L29 pseudogene 12; ribosomal protein L29 pseudogene 11; ribosomal protein L29; ribosomal protein L29 pseudogene 26
8086148	RPL29P12	Homo sapiens	ribosomal protein L29 pseudogene 9; ribosomal protein L29 pseudogene 12; ribosomal protein L29 pseudogene 11; ribosomal protein L29; ribosomal protein L29 pseudogene 26
7978710	RNU6-2	Homo sapiens	RNA, U6 small nuclear 2; RNA, U6 small nuclear 1
7978710	RNU6-1	Homo sapiens	RNA, U6 small nuclear 2; RNA, U6 small nuclear 1
8099696	sepsecs	Homo sapiens	Sep (O-phosphoserine) tRNA:Sec (selenocysteine) tRNA synthase
7896623	ABCF1	Homo sapiens	ATP-binding cassette, sub-family F (GCN20), member 1
8122196	RN5S10, RN	Homo sapiens	RNA, 5S ribosomal 9; RNA, 5S ribosomal 13; RNA, 5S ribosomal 12; RNA, 5S ribosomal 11; RNA, 5S ribosomal 10; RNA, 5S ribosomal 17; RNA, 5S ribosomal 16; RNA, 5S ribosomal 15; RNA, 5S ribosomal 14; RNA, 5S ribosomal 1; RNA, 5S ribosomal 2; RNA, 5S ribosomal 3; RNA, 5S ribosomal 4; RNA, 5S ribosomal 5; RNA, 5S ribosomal 6; RNA, 5S ribosomal 7; RNA, 5S ribosomal 8
8122196	RN5S11	Homo sapiens	RNA, 5S ribosomal 9; RNA, 5S ribosomal 13; RNA, 5S ribosomal 12; RNA, 5S ribosomal 11; RNA, 5S ribosomal 10; RNA, 5S ribosomal 17; RNA, 5S ribosomal 16; RNA, 5S ribosomal 15; RNA, 5S ribosomal 14; RNA, 5S ribosomal 1; RNA, 5S ribosomal 2; RNA, 5S ribosomal 3; RNA, 5S ribosomal 4; RNA, 5S ribosomal 5; RNA, 5S ribosomal 6; RNA, 5S ribosomal 7; RNA, 5S ribosomal 8
8122196	RN5S12	Homo sapiens	RNA, 5S ribosomal 9; RNA, 5S ribosomal 13; RNA, 5S ribosomal 12; RNA, 5S ribosomal 11; RNA, 5S ribosomal 10; RNA, 5S ribosomal 17; RNA, 5S ribosomal 16; RNA, 5S ribosomal 15; RNA, 5S ribosomal 14; RNA, 5S ribosomal 1; RNA, 5S ribosomal 2; RNA, 5S ribosomal 3; RNA, 5S ribosomal 4; RNA, 5S ribosomal 5; RNA, 5S ribosomal 6; RNA, 5S ribosomal 7; RNA, 5S ribosomal 8
8122196	RN5S13	Homo sapiens	RNA, 5S ribosomal 9; RNA, 5S ribosomal 13; RNA, 5S ribosomal 12; RNA, 5S ribosomal 11; RNA, 5S ribosomal 10; RNA, 5S ribosomal 17; RNA, 5S ribosomal 16; RNA, 5S ribosomal 15; RNA, 5S ribosomal 14; RNA, 5S ribosomal 1; RNA, 5S ribosomal 2; RNA, 5S ribosomal 3; RNA, 5S ribosomal 4; RNA, 5S ribosomal 5; RNA, 5S ribosomal 6; RNA, 5S ribosomal 7; RNA, 5S ribosomal 8
8122196	RN5S14	Homo sapiens	RNA, 5S ribosomal 9; RNA, 5S ribosomal 13; RNA, 5S ribosomal 12; RNA, 5S ribosomal 11; RNA, 5S ribosomal 10; RNA, 5S ribosomal 17; RNA, 5S ribosomal 16; RNA, 5S ribosomal 15; RNA, 5S ribosomal 14; RNA, 5S ribosomal 1; RNA, 5S ribosomal 2; RNA, 5S ribosomal 3; RNA, 5S ribosomal 4; RNA, 5S ribosomal 5; RNA, 5S ribosomal 6; RNA, 5S ribosomal 7; RNA, 5S ribosomal 8
8122196	RN5S15	Homo sapiens	RNA, 5S ribosomal 9; RNA, 5S ribosomal 13; RNA, 5S ribosomal 12; RNA, 5S ribosomal 11; RNA, 5S ribosomal 10; RNA, 5S ribosomal 17; RNA, 5S ribosomal 16; RNA, 5S ribosomal 15; RNA, 5S ribosomal 14; RNA, 5S ribosomal 1; RNA, 5S ribosomal 2; RNA, 5S ribosomal 3; RNA, 5S ribosomal 4; RNA, 5S ribosomal 5; RNA, 5S ribosomal 6; RNA, 5S ribosomal 7; RNA, 5S ribosomal 8
8122196	RN5S16	Homo sapiens	RNA, 5S ribosomal 9; RNA, 5S ribosomal 13; RNA, 5S ribosomal 12; RNA, 5S ribosomal 11; RNA, 5S ribosomal 10; RNA, 5S ribosomal 17; RNA, 5S ribosomal 16; RNA, 5S ribosomal 15; RNA, 5S ribosomal 14; RNA, 5S ribosomal 1; RNA, 5S ribosomal 2; RNA, 5S ribosomal 3; RNA, 5S ribosomal 4; RNA, 5S ribosomal 5; RNA, 5S ribosomal 6; RNA, 5S ribosomal 7; RNA, 5S ribosomal 8
8122196	RN5S6	Homo sapiens	RNA, 5S ribosomal 9; RNA, 5S ribosomal 13; RNA, 5S ribosomal 12; RNA, 5S ribosomal 11; RNA, 5S ribosomal 10; RNA, 5S ribosomal 17; RNA, 5S ribosomal 16; RNA, 5S ribosomal 15; RNA, 5S ribosomal 14; RNA, 5S ribosomal 1; RNA, 5S ribosomal 2; RNA, 5S ribosomal 3; RNA, 5S ribosomal 4; RNA, 5S ribosomal 5; RNA, 5S ribosomal 6; RNA, 5S ribosomal 7; RNA, 5S ribosomal 8
8122196	RN5S7	Homo sapiens	RNA, 5S ribosomal 9; RNA, 5S ribosomal 13; RNA, 5S ribosomal 12; RNA, 5S ribosomal 11; RNA, 5S ribosomal 10; RNA, 5S ribosomal 17; RNA, 5S ribosomal 16; RNA, 5S ribosomal 15; RNA, 5S ribosomal 14; RNA, 5S ribosomal 1; RNA, 5S ribosomal 2; RNA, 5S ribosomal 3; RNA, 5S ribosomal 4; RNA, 5S ribosomal 5; RNA, 5S ribosomal 6; RNA, 5S ribosomal 7; RNA, 5S ribosomal 8
8122196	RN5S8	Homo sapiens	RNA, 5S ribosomal 9; RNA, 5S ribosomal 13; RNA, 5S ribosomal 12; RNA, 5S ribosomal 11; RNA, 5S ribosomal 10; RNA, 5S ribosomal 17; RNA, 5S ribosomal 16; RNA, 5S ribosomal 15; RNA, 5S ribosomal 14; RNA, 5S ribosomal 1; RNA, 5S ribosomal 2; RNA, 5S ribosomal 3; RNA, 5S ribosomal 4; RNA, 5S ribosomal 5; RNA, 5S ribosomal 6; RNA, 5S ribosomal 7; RNA, 5S ribosomal 8
8122196	RN5S9	Homo sapiens	RNA, 5S ribosomal 9; RNA, 5S ribosomal 13; RNA, 5S ribosomal 12; RNA, 5S ribosomal 11; RNA, 5S ribosomal 10; RNA, 5S ribosomal 17; RNA, 5S ribosomal 16; RNA, 5S ribosomal 15; RNA, 5S ribosomal 14; RNA, 5S ribosomal 1; RNA, 5S ribosomal 2; RNA, 5S ribosomal 3; RNA, 5S ribosomal 4; RNA, 5S ribosomal 5; RNA, 5S ribosomal 6; RNA, 5S ribosomal 7; RNA, 5S ribosomal 8
8122196	RN5S2	Homo sapiens	RNA, 5S ribosomal 9; RNA, 5S ribosomal 13; RNA, 5S ribosomal 12; RNA, 5S ribosomal 11; RNA, 5S ribosomal 10; RNA, 5S ribosomal 17; RNA, 5S ribosomal 16; RNA, 5S ribosomal 15; RNA, 5S ribosomal 14; RNA, 5S ribosomal 1; RNA, 5S ribosomal 2; RNA, 5S ribosomal 3; RNA, 5S ribosomal 4; RNA, 5S ribosomal 5; RNA, 5S ribosomal 6; RNA, 5S ribosomal 7; RNA, 5S ribosomal 8
8122196	RN5S3	Homo sapiens	RNA, 5S ribosomal 9; RNA, 5S ribosomal 13; RNA, 5S ribosomal 12; RNA, 5S ribosomal 11; RNA, 5S ribosomal 10; RNA, 5S ribosomal 17; RNA, 5S ribosomal 16; RNA, 5S ribosomal 15; RNA, 5S ribosomal 14; RNA, 5S ribosomal 1; RNA, 5S ribosomal 2; RNA, 5S ribosomal 3; RNA, 5S ribosomal 4; RNA, 5S ribosomal 5; RNA, 5S ribosomal 6; RNA, 5S ribosomal 7; RNA, 5S ribosomal 8
8122196	RN5S4	Homo sapiens	RNA, 5S ribosomal 9; RNA, 5S ribosomal 13; RNA, 5S ribosomal 12; RNA, 5S ribosomal 11; RNA, 5S ribosomal 10; RNA, 5S ribosomal 17; RNA, 5S ribosomal 16; RNA, 5S ribosomal 15; RNA, 5S ribosomal 14; RNA, 5S ribosomal 1; RNA, 5S ribosomal 2; RNA, 5S ribosomal 3; RNA, 5S ribosomal 4; RNA, 5S ribosomal 5; RNA, 5S ribosomal 6; RNA, 5S ribosomal 7; RNA, 5S ribosomal 8
8122196	RN5S5	Homo sapiens	RNA, 5S ribosomal 9; RNA, 5S ribosomal 13; RNA, 5S ribosomal 12; RNA, 5S ribosomal 11; RNA, 5S ribosomal 10; RNA, 5S ribosomal 17; RNA, 5S ribosomal 16; RNA, 5S ribosomal 15; RNA, 5S ribosomal 14; RNA, 5S ribosomal 1; RNA, 5S ribosomal 2; RNA, 5S ribosomal 3; RNA, 5S ribosomal 4; RNA, 5S ribosomal 5; RNA, 5S ribosomal 6; RNA, 5S ribosomal 7; RNA, 5S ribosomal 8
8122196	RN5S1	Homo sapiens	RNA, 5S ribosomal 9; RNA, 5S ribosomal 13; RNA, 5S ribosomal 12; RNA, 5S ribosomal 11; RNA, 5S ribosomal 10; RNA, 5S ribosomal 17; RNA, 5S ribosomal 16; RNA, 5S ribosomal 15; RNA, 5S ribosomal 14; RNA, 5S ribosomal 1; RNA, 5S ribosomal 2; RNA, 5S ribosomal 3; RNA, 5S ribosomal 4; RNA, 5S ribosomal 5; RNA, 5S ribosomal 6; RNA, 5S ribosomal 7; RNA, 5S ribosomal 8
8122196	RN5S17	Homo sapiens	RNA, 5S ribosomal 9; RNA, 5S ribosomal 13; RNA, 5S ribosomal 12; RNA, 5S ribosomal 11; RNA, 5S ribosomal 10; RNA, 5S ribosomal 17; RNA, 5S ribosomal 16; RNA, 5S ribosomal 15; RNA, 5S ribosomal 14; RNA, 5S ribosomal 1; RNA, 5S ribosomal 2; RNA, 5S ribosomal 3; RNA, 5S ribosomal 4; RNA, 5S ribosomal 5; RNA, 5S ribosomal 6; RNA, 5S ribosomal 7; RNA, 5S ribosomal 8
8112070	RN5S10	Homo sapiens	RNA, 5S ribosomal 9; RNA, 5S ribosomal 13; RNA, 5S ribosomal 12; RNA, 5S ribosomal 11; RNA, 5S ribosomal 10; RNA, 5S ribosomal 17; RNA, 5S ribosomal 16; RNA, 5S ribosomal 15; RNA, 5S ribosomal 14; RNA, 5S ribosomal 1; RNA, 5S ribosomal 2; RNA, 5S ribosomal 3; RNA, 5S ribosomal 4; RNA, 5S ribosomal 5; RNA, 5S ribosomal 6; RNA, 5S ribosomal 7; RNA, 5S ribosomal 8
8112070	RN5S11	Homo sapiens	RNA, 5S ribosomal 9; RNA, 5S ribosomal 13; RNA, 5S ribosomal 12; RNA, 5S ribosomal 11; RNA, 5S ribosomal 10; RNA, 5S ribosomal 17; RNA, 5S ribosomal 16; RNA, 5S ribosomal 15; RNA, 5S ribosomal 14; RNA, 5S ribosomal 1; RNA, 5S ribosomal 2; RNA, 5S ribosomal 3; RNA, 5S ribosomal 4; RNA, 5S ribosomal 5; RNA, 5S ribosomal 6; RNA, 5S ribosomal 7; RNA, 5S ribosomal 8
8112070	RN5S12	Homo sapiens	RNA, 5S ribosomal 9; RNA, 5S ribosomal 13; RNA, 5S ribosomal 12; RNA, 5S ribosomal 11; RNA, 5S ribosomal 10; RNA, 5S ribosomal 17; RNA, 5S ribosomal 16; RNA, 5S ribosomal 15; RNA, 5S ribosomal 14; RNA, 5S ribosomal 1; RNA, 5S ribosomal 2; RNA, 5S ribosomal 3; RNA, 5S ribosomal 4; RNA, 5S ribosomal 5; RNA, 5S ribosomal 6; RNA, 5S ribosomal 7; RNA, 5S ribosomal 8
8112070	RN5S13	Homo sapiens	RNA, 5S ribosomal 9; RNA, 5S ribosomal 13; RNA, 5S ribosomal 12; RNA, 5S ribosomal 11; RNA, 5S ribosomal 10; RNA, 5S ribosomal 17; RNA, 5S ribosomal 16; RNA, 5S ribosomal 15; RNA, 5S ribosomal 14; RNA, 5S ribosomal 1; RNA, 5S ribosomal 2; RNA, 5S ribosomal 3; RNA, 5S ribosomal 4; RNA, 5S ribosomal 5; RNA, 5S ribosomal 6; RNA, 5S ribosomal 7; RNA, 5S ribosomal 8
8112070	RN5S14	Homo sapiens	RNA, 5S ribosomal 9; RNA, 5S ribosomal 13; RNA, 5S ribosomal 12; RNA, 5S ribosomal 11; RNA, 5S ribosomal 10; RNA, 5S ribosomal 17; RNA, 5S ribosomal 16; RNA, 5S ribosomal 15; RNA, 5S ribosomal 14; RNA, 5S ribosomal 1; RNA, 5S ribosomal 2; RNA, 5S ribosomal 3; RNA, 5S ribosomal 4; RNA, 5S ribosomal 5; RNA, 5S ribosomal 6; RNA, 5S ribosomal 7; RNA, 5S ribosomal 8
8112070	RN5S15	Homo sapiens	RNA, 5S ribosomal 9; RNA, 5S ribosomal 13; RNA, 5S ribosomal 12; RNA, 5S ribosomal 11; RNA, 5S ribosomal 10; RNA, 5S ribosomal 17; RNA, 5S ribosomal 16; RNA, 5S ribosomal 15; RNA, 5S ribosomal 14; RNA, 5S ribosomal 1; RNA, 5S ribosomal 2; RNA, 5S ribosomal 3; RNA, 5S ribosomal 4; RNA, 5S ribosomal 5; RNA, 5S ribosomal 6; RNA, 5S ribosomal 7; RNA, 5S ribosomal 8
8112070	RN5S16	Homo sapiens	RNA, 5S ribosomal 9; RNA, 5S ribosomal 13; RNA, 5S ribosomal 12; RNA, 5S ribosomal 11; RNA, 5S ribosomal 10; RNA, 5S ribosomal 17; RNA, 5S ribosomal 16; RNA, 5S ribosomal 15; RNA, 5S ribosomal 14; RNA, 5S ribosomal 1; RNA, 5S ribosomal 2; RNA, 5S ribosomal 3; RNA, 5S ribosomal 4; RNA, 5S ribosomal 5; RNA, 5S ribosomal 6; RNA, 5S ribosomal 7; RNA, 5S ribosomal 8
8112070	RN5S6	Homo sapiens	RNA, 5S ribosomal 9; RNA, 5S ribosomal 13; RNA, 5S ribosomal 12; RNA, 5S ribosomal 11; RNA, 5S ribosomal 10; RNA, 5S ribosomal 17; RNA, 5S ribosomal 16; RNA, 5S ribosomal 15; RNA, 5S ribosomal 14; RNA, 5S ribosomal 1; RNA, 5S ribosomal 2; RNA, 5S ribosomal 3; RNA, 5S ribosomal 4; RNA, 5S ribosomal 5; RNA, 5S ribosomal 6; RNA, 5S ribosomal 7; RNA, 5S ribosomal 8
8112070	RN5S7	Homo sapiens	RNA, 5S ribosomal 9; RNA, 5S ribosomal 13; RNA, 5S ribosomal 12; RNA, 5S ribosomal 11; RNA, 5S ribosomal 10; RNA, 5S ribosomal 17; RNA, 5S ribosomal 16; RNA, 5S ribosomal 15; RNA, 5S ribosomal 14; RNA, 5S ribosomal 1; RNA, 5S ribosomal 2; RNA, 5S ribosomal 3; RNA, 5S ribosomal 4; RNA, 5S ribosomal 5; RNA, 5S ribosomal 6; RNA, 5S ribosomal 7; RNA, 5S ribosomal 8
8112070	RN5S8	Homo sapiens	RNA, 5S ribosomal 9; RNA, 5S ribosomal 13; RNA, 5S ribosomal 12; RNA, 5S ribosomal 11; RNA, 5S ribosomal 10; RNA, 5S ribosomal 17; RNA, 5S ribosomal 16; RNA, 5S ribosomal 15; RNA, 5S ribosomal 14; RNA, 5S ribosomal 1; RNA, 5S ribosomal 2; RNA, 5S ribosomal 3; RNA, 5S ribosomal 4; RNA, 5S ribosomal 5; RNA, 5S ribosomal 6; RNA, 5S ribosomal 7; RNA, 5S ribosomal 8
8112070	RN5S9	Homo sapiens	RNA, 5S ribosomal 9; RNA, 5S ribosomal 13; RNA, 5S ribosomal 12; RNA, 5S ribosomal 11; RNA, 5S ribosomal 10; RNA, 5S ribosomal 17; RNA, 5S ribosomal 16; RNA, 5S ribosomal 15; RNA, 5S ribosomal 14; RNA, 5S ribosomal 1; RNA, 5S ribosomal 2; RNA, 5S ribosomal 3; RNA, 5S ribosomal 4; RNA, 5S ribosomal 5; RNA, 5S ribosomal 6; RNA, 5S ribosomal 7; RNA, 5S ribosomal 8
8112070	RN5S2	Homo sapiens	RNA, 5S ribosomal 9; RNA, 5S ribosomal 13; RNA, 5S ribosomal 12; RNA, 5S ribosomal 11; RNA, 5S ribosomal 10; RNA, 5S ribosomal 17; RNA, 5S ribosomal 16; RNA, 5S ribosomal 15; RNA, 5S ribosomal 14; RNA, 5S ribosomal 1; RNA, 5S ribosomal 2; RNA, 5S ribosomal 3; RNA, 5S ribosomal 4; RNA, 5S ribosomal 5; RNA, 5S ribosomal 6; RNA, 5S ribosomal 7; RNA, 5S ribosomal 8
8112070	RN5S3	Homo sapiens	RNA, 5S ribosomal 9; RNA, 5S ribosomal 13; RNA, 5S ribosomal 12; RNA, 5S ribosomal 11; RNA, 5S ribosomal 10; RNA, 5S ribosomal 17; RNA, 5S ribosomal 16; RNA, 5S ribosomal 15; RNA, 5S ribosomal 14; RNA, 5S ribosomal 1; RNA, 5S ribosomal 2; RNA, 5S ribosomal 3; RNA, 5S ribosomal 4; RNA, 5S ribosomal 5; RNA, 5S ribosomal 6; RNA, 5S ribosomal 7; RNA, 5S ribosomal 8
8112070	RN5S4	Homo sapiens	RNA, 5S ribosomal 9; RNA, 5S ribosomal 13; RNA, 5S ribosomal 12; RNA, 5S ribosomal 11; RNA, 5S ribosomal 10; RNA, 5S ribosomal 17; RNA, 5S ribosomal 16; RNA, 5S ribosomal 15; RNA, 5S ribosomal 14; RNA, 5S ribosomal 1; RNA, 5S ribosomal 2; RNA, 5S ribosomal 3; RNA, 5S ribosomal 4; RNA, 5S ribosomal 5; RNA, 5S ribosomal 6; RNA, 5S ribosomal 7; RNA, 5S ribosomal 8
8112070	RN5S5	Homo sapiens	RNA, 5S ribosomal 9; RNA, 5S ribosomal 13; RNA, 5S ribosomal 12; RNA, 5S ribosomal 11; RNA, 5S ribosomal 10; RNA, 5S ribosomal 17; RNA, 5S ribosomal 16; RNA, 5S ribosomal 15; RNA, 5S ribosomal 14; RNA, 5S ribosomal 1; RNA, 5S ribosomal 2; RNA, 5S ribosomal 3; RNA, 5S ribosomal 4; RNA, 5S ribosomal 5; RNA, 5S ribosomal 6; RNA, 5S ribosomal 7; RNA, 5S ribosomal 8
8112070	RN5S1	Homo sapiens	RNA, 5S ribosomal 9; RNA, 5S ribosomal 13; RNA, 5S ribosomal 12; RNA, 5S ribosomal 11; RNA, 5S ribosomal 10; RNA, 5S ribosomal 17; RNA, 5S ribosomal 16; RNA, 5S ribosomal 15; RNA, 5S ribosomal 14; RNA, 5S ribosomal 1; RNA, 5S ribosomal 2; RNA, 5S ribosomal 3; RNA, 5S ribosomal 4; RNA, 5S ribosomal 5; RNA, 5S ribosomal 6; RNA, 5S ribosomal 7; RNA, 5S ribosomal 8
8112070	RN5S17	Homo sapiens	RNA, 5S ribosomal 9; RNA, 5S ribosomal 13; RNA, 5S ribosomal 12; RNA, 5S ribosomal 11; RNA, 5S ribosomal 10; RNA, 5S ribosomal 17; RNA, 5S ribosomal 16; RNA, 5S ribosomal 15; RNA, 5S ribosomal 14; RNA, 5S ribosomal 1; RNA, 5S ribosomal 2; RNA, 5S ribosomal 3; RNA, 5S ribosomal 4; RNA, 5S ribosomal 5; RNA, 5S ribosomal 6; RNA, 5S ribosomal 7; RNA, 5S ribosomal 8
7987248	GOLGA8B	Homo sapiens	golgi autoantigen, golgin subfamily a, 8B; golgi autoantigen, golgin subfamily a, 8A
7987248	GOLGA8A	Homo sapiens	golgi autoantigen, golgin subfamily a, 8B; golgi autoantigen, golgin subfamily a, 8A
8078360	stt3b	Homo sapiens	STT3, subunit of the oligosaccharyltransferase complex, homolog B (S. cerevisiae)
7979367	exoc5	Homo sapiens	exocyst complex component 5
7926836	RAB18	Homo sapiens	RAB18, member RAS oncogene family
8149322	RNU6-2	Homo sapiens	RNA, U6 small nuclear 2; RNA, U6 small nuclear 1
8149322	RNU6-1	Homo sapiens	RNA, U6 small nuclear 2; RNA, U6 small nuclear 1
7893325	Hnrnpc	Homo sapiens	heterogeneous nuclear ribonucleoprotein C (C1/C2)
7961420	RNU6-2	Homo sapiens	RNA, U6 small nuclear 2; RNA, U6 small nuclear 1
7961420	RNU6-1	Homo sapiens	RNA, U6 small nuclear 2; RNA, U6 small nuclear 1
8021668	CDH7	Homo sapiens	cadherin 7, type 2
8020209	RNU6-2	Homo sapiens	RNA, U6 small nuclear 2; RNA, U6 small nuclear 1
8020209	RNU6-1	Homo sapiens	RNA, U6 small nuclear 2; RNA, U6 small nuclear 1
8076209	RPL3	Homo sapiens	ribosomal protein L3; similar to 60S ribosomal protein L3 (L4)
8076209	LOC653881	Homo sapiens	ribosomal protein L3; similar to 60S ribosomal protein L3 (L4)
8161460	FLJ37512	Homo sapiens	novel protein similar to contactin associated protein-like 3 (CNTNAP3)
8007441	Rpl27	Homo sapiens	ribosomal protein L27
8165711	Plcxd1	Homo sapiens	phosphatidylinositol-specific phospholipase C, X domain containing 1
8083166	Trpc1	Homo sapiens	transient receptor potential cation channel, subfamily C, member 1
8161455	KGFLP1	Homo sapiens	keratinocyte growth factor-like protein 1
7948656	FTHL3	Homo sapiens	ferritin, heavy polypeptide 1; ferritin, heavy polypeptide-like 16; similar to ferritin, heavy polypeptide 1; ferritin, heavy polypeptide-like 3 pseudogene
7948656	FTHL16	Homo sapiens	ferritin, heavy polypeptide 1; ferritin, heavy polypeptide-like 16; similar to ferritin, heavy polypeptide 1; ferritin, heavy polypeptide-like 3 pseudogene
7948656	FTHL20	Homo sapiens	ferritin, heavy polypeptide 1; ferritin, heavy polypeptide-like 16; similar to ferritin, heavy polypeptide 1; ferritin, heavy polypeptide-like 3 pseudogene
7948656	FTH1	Homo sapiens	ferritin, heavy polypeptide 1; ferritin, heavy polypeptide-like 16; similar to ferritin, heavy polypeptide 1; ferritin, heavy polypeptide-like 3 pseudogene
7998119	WASH5P	Homo sapiens	WAS protein family homolog 3 pseudogene; WAS protein family homolog 2 pseudogene; WAS protein family homolog 1; WAS protein family homolog 5 pseudogene
7998119	LOC375690	Homo sapiens	WAS protein family homolog 3 pseudogene; WAS protein family homolog 2 pseudogene; WAS protein family homolog 1; WAS protein family homolog 5 pseudogene
7998119	WASH3P	Homo sapiens	WAS protein family homolog 3 pseudogene; WAS protein family homolog 2 pseudogene; WAS protein family homolog 1; WAS protein family homolog 5 pseudogene
7998119	WASH2P	Homo sapiens	WAS protein family homolog 3 pseudogene; WAS protein family homolog 2 pseudogene; WAS protein family homolog 1; WAS protein family homolog 5 pseudogene
7906948	RN5S10	Homo sapiens	RNA, 5S ribosomal 9; RNA, 5S ribosomal 13; RNA, 5S ribosomal 12; RNA, 5S ribosomal 11; RNA, 5S ribosomal 10; RNA, 5S ribosomal 17; RNA, 5S ribosomal 16; RNA, 5S ribosomal 15; RNA, 5S ribosomal 14; RNA, 5S ribosomal 1; RNA, 5S ribosomal 2; RNA, 5S ribosomal 3; RNA, 5S ribosomal 4; RNA, 5S ribosomal 5; RNA, 5S ribosomal 6; RNA, 5S ribosomal 7; RNA, 5S ribosomal 8
7906948	RN5S11	Homo sapiens	RNA, 5S ribosomal 9; RNA, 5S ribosomal 13; RNA, 5S ribosomal 12; RNA, 5S ribosomal 11; RNA, 5S ribosomal 10; RNA, 5S ribosomal 17; RNA, 5S ribosomal 16; RNA, 5S ribosomal 15; RNA, 5S ribosomal 14; RNA, 5S ribosomal 1; RNA, 5S ribosomal 2; RNA, 5S ribosomal 3; RNA, 5S ribosomal 4; RNA, 5S ribosomal 5; RNA, 5S ribosomal 6; RNA, 5S ribosomal 7; RNA, 5S ribosomal 8
7906948	RN5S12	Homo sapiens	RNA, 5S ribosomal 9; RNA, 5S ribosomal 13; RNA, 5S ribosomal 12; RNA, 5S ribosomal 11; RNA, 5S ribosomal 10; RNA, 5S ribosomal 17; RNA, 5S ribosomal 16; RNA, 5S ribosomal 15; RNA, 5S ribosomal 14; RNA, 5S ribosomal 1; RNA, 5S ribosomal 2; RNA, 5S ribosomal 3; RNA, 5S ribosomal 4; RNA, 5S ribosomal 5; RNA, 5S ribosomal 6; RNA, 5S ribosomal 7; RNA, 5S ribosomal 8
7906948	RN5S13	Homo sapiens	RNA, 5S ribosomal 9; RNA, 5S ribosomal 13; RNA, 5S ribosomal 12; RNA, 5S ribosomal 11; RNA, 5S ribosomal 10; RNA, 5S ribosomal 17; RNA, 5S ribosomal 16; RNA, 5S ribosomal 15; RNA, 5S ribosomal 14; RNA, 5S ribosomal 1; RNA, 5S ribosomal 2; RNA, 5S ribosomal 3; RNA, 5S ribosomal 4; RNA, 5S ribosomal 5; RNA, 5S ribosomal 6; RNA, 5S ribosomal 7; RNA, 5S ribosomal 8
7906948	RN5S14	Homo sapiens	RNA, 5S ribosomal 9; RNA, 5S ribosomal 13; RNA, 5S ribosomal 12; RNA, 5S ribosomal 11; RNA, 5S ribosomal 10; RNA, 5S ribosomal 17; RNA, 5S ribosomal 16; RNA, 5S ribosomal 15; RNA, 5S ribosomal 14; RNA, 5S ribosomal 1; RNA, 5S ribosomal 2; RNA, 5S ribosomal 3; RNA, 5S ribosomal 4; RNA, 5S ribosomal 5; RNA, 5S ribosomal 6; RNA, 5S ribosomal 7; RNA, 5S ribosomal 8
7906948	RN5S15	Homo sapiens	RNA, 5S ribosomal 9; RNA, 5S ribosomal 13; RNA, 5S ribosomal 12; RNA, 5S ribosomal 11; RNA, 5S ribosomal 10; RNA, 5S ribosomal 17; RNA, 5S ribosomal 16; RNA, 5S ribosomal 15; RNA, 5S ribosomal 14; RNA, 5S ribosomal 1; RNA, 5S ribosomal 2; RNA, 5S ribosomal 3; RNA, 5S ribosomal 4; RNA, 5S ribosomal 5; RNA, 5S ribosomal 6; RNA, 5S ribosomal 7; RNA, 5S ribosomal 8
7906948	RN5S16	Homo sapiens	RNA, 5S ribosomal 9; RNA, 5S ribosomal 13; RNA, 5S ribosomal 12; RNA, 5S ribosomal 11; RNA, 5S ribosomal 10; RNA, 5S ribosomal 17; RNA, 5S ribosomal 16; RNA, 5S ribosomal 15; RNA, 5S ribosomal 14; RNA, 5S ribosomal 1; RNA, 5S ribosomal 2; RNA, 5S ribosomal 3; RNA, 5S ribosomal 4; RNA, 5S ribosomal 5; RNA, 5S ribosomal 6; RNA, 5S ribosomal 7; RNA, 5S ribosomal 8
7906948	RN5S6	Homo sapiens	RNA, 5S ribosomal 9; RNA, 5S ribosomal 13; RNA, 5S ribosomal 12; RNA, 5S ribosomal 11; RNA, 5S ribosomal 10; RNA, 5S ribosomal 17; RNA, 5S ribosomal 16; RNA, 5S ribosomal 15; RNA, 5S ribosomal 14; RNA, 5S ribosomal 1; RNA, 5S ribosomal 2; RNA, 5S ribosomal 3; RNA, 5S ribosomal 4; RNA, 5S ribosomal 5; RNA, 5S ribosomal 6; RNA, 5S ribosomal 7; RNA, 5S ribosomal 8
7906948	RN5S7	Homo sapiens	RNA, 5S ribosomal 9; RNA, 5S ribosomal 13; RNA, 5S ribosomal 12; RNA, 5S ribosomal 11; RNA, 5S ribosomal 10; RNA, 5S ribosomal 17; RNA, 5S ribosomal 16; RNA, 5S ribosomal 15; RNA, 5S ribosomal 14; RNA, 5S ribosomal 1; RNA, 5S ribosomal 2; RNA, 5S ribosomal 3; RNA, 5S ribosomal 4; RNA, 5S ribosomal 5; RNA, 5S ribosomal 6; RNA, 5S ribosomal 7; RNA, 5S ribosomal 8
7906948	RN5S8	Homo sapiens	RNA, 5S ribosomal 9; RNA, 5S ribosomal 13; RNA, 5S ribosomal 12; RNA, 5S ribosomal 11; RNA, 5S ribosomal 10; RNA, 5S ribosomal 17; RNA, 5S ribosomal 16; RNA, 5S ribosomal 15; RNA, 5S ribosomal 14; RNA, 5S ribosomal 1; RNA, 5S ribosomal 2; RNA, 5S ribosomal 3; RNA, 5S ribosomal 4; RNA, 5S ribosomal 5; RNA, 5S ribosomal 6; RNA, 5S ribosomal 7; RNA, 5S ribosomal 8
7906948	RN5S9	Homo sapiens	RNA, 5S ribosomal 9; RNA, 5S ribosomal 13; RNA, 5S ribosomal 12; RNA, 5S ribosomal 11; RNA, 5S ribosomal 10; RNA, 5S ribosomal 17; RNA, 5S ribosomal 16; RNA, 5S ribosomal 15; RNA, 5S ribosomal 14; RNA, 5S ribosomal 1; RNA, 5S ribosomal 2; RNA, 5S ribosomal 3; RNA, 5S ribosomal 4; RNA, 5S ribosomal 5; RNA, 5S ribosomal 6; RNA, 5S ribosomal 7; RNA, 5S ribosomal 8
7906948	RN5S2	Homo sapiens	RNA, 5S ribosomal 9; RNA, 5S ribosomal 13; RNA, 5S ribosomal 12; RNA, 5S ribosomal 11; RNA, 5S ribosomal 10; RNA, 5S ribosomal 17; RNA, 5S ribosomal 16; RNA, 5S ribosomal 15; RNA, 5S ribosomal 14; RNA, 5S ribosomal 1; RNA, 5S ribosomal 2; RNA, 5S ribosomal 3; RNA, 5S ribosomal 4; RNA, 5S ribosomal 5; RNA, 5S ribosomal 6; RNA, 5S ribosomal 7; RNA, 5S ribosomal 8
7906948	RN5S3	Homo sapiens	RNA, 5S ribosomal 9; RNA, 5S ribosomal 13; RNA, 5S ribosomal 12; RNA, 5S ribosomal 11; RNA, 5S ribosomal 10; RNA, 5S ribosomal 17; RNA, 5S ribosomal 16; RNA, 5S ribosomal 15; RNA, 5S ribosomal 14; RNA, 5S ribosomal 1; RNA, 5S ribosomal 2; RNA, 5S ribosomal 3; RNA, 5S ribosomal 4; RNA, 5S ribosomal 5; RNA, 5S ribosomal 6; RNA, 5S ribosomal 7; RNA, 5S ribosomal 8
7906948	RN5S4	Homo sapiens	RNA, 5S ribosomal 9; RNA, 5S ribosomal 13; RNA, 5S ribosomal 12; RNA, 5S ribosomal 11; RNA, 5S ribosomal 10; RNA, 5S ribosomal 17; RNA, 5S ribosomal 16; RNA, 5S ribosomal 15; RNA, 5S ribosomal 14; RNA, 5S ribosomal 1; RNA, 5S ribosomal 2; RNA, 5S ribosomal 3; RNA, 5S ribosomal 4; RNA, 5S ribosomal 5; RNA, 5S ribosomal 6; RNA, 5S ribosomal 7; RNA, 5S ribosomal 8
7906948	RN5S5	Homo sapiens	RNA, 5S ribosomal 9; RNA, 5S ribosomal 13; RNA, 5S ribosomal 12; RNA, 5S ribosomal 11; RNA, 5S ribosomal 10; RNA, 5S ribosomal 17; RNA, 5S ribosomal 16; RNA, 5S ribosomal 15; RNA, 5S ribosomal 14; RNA, 5S ribosomal 1; RNA, 5S ribosomal 2; RNA, 5S ribosomal 3; RNA, 5S ribosomal 4; RNA, 5S ribosomal 5; RNA, 5S ribosomal 6; RNA, 5S ribosomal 7; RNA, 5S ribosomal 8
7906948	RN5S1	Homo sapiens	RNA, 5S ribosomal 9; RNA, 5S ribosomal 13; RNA, 5S ribosomal 12; RNA, 5S ribosomal 11; RNA, 5S ribosomal 10; RNA, 5S ribosomal 17; RNA, 5S ribosomal 16; RNA, 5S ribosomal 15; RNA, 5S ribosomal 14; RNA, 5S ribosomal 1; RNA, 5S ribosomal 2; RNA, 5S ribosomal 3; RNA, 5S ribosomal 4; RNA, 5S ribosomal 5; RNA, 5S ribosomal 6; RNA, 5S ribosomal 7; RNA, 5S ribosomal 8
7906948	RN5S17	Homo sapiens	RNA, 5S ribosomal 9; RNA, 5S ribosomal 13; RNA, 5S ribosomal 12; RNA, 5S ribosomal 11; RNA, 5S ribosomal 10; RNA, 5S ribosomal 17; RNA, 5S ribosomal 16; RNA, 5S ribosomal 15; RNA, 5S ribosomal 14; RNA, 5S ribosomal 1; RNA, 5S ribosomal 2; RNA, 5S ribosomal 3; RNA, 5S ribosomal 4; RNA, 5S ribosomal 5; RNA, 5S ribosomal 6; RNA, 5S ribosomal 7; RNA, 5S ribosomal 8
7895831	RPL12P16	Homo sapiens	ribosomal protein L12 pseudogene 16
8021685	CCDC102B	Homo sapiens	coiled-coil domain containing 102B
8132690	RNU6-2	Homo sapiens	RNA, U6 small nuclear 2; RNA, U6 small nuclear 1
8132690	RNU6-1	Homo sapiens	RNA, U6 small nuclear 2; RNA, U6 small nuclear 1
7895101	ARF3	Homo sapiens	ADP-ribosylation factor 3
8132692	RNU6-2	Homo sapiens	RNA, U6 small nuclear 2; RNA, U6 small nuclear 1
8132692	RNU6-1	Homo sapiens	RNA, U6 small nuclear 2; RNA, U6 small nuclear 1
8016429	RNU6-2	Homo sapiens	RNA, U6 small nuclear 2; RNA, U6 small nuclear 1
8016429	RNU6-1	Homo sapiens	RNA, U6 small nuclear 2; RNA, U6 small nuclear 1
7895517	DDX5	Homo sapiens	DEAD (Asp-Glu-Ala-Asp) box polypeptide 5
7895518	RPL18	Homo sapiens	ribosomal protein L18
8098146	NPY5R	Homo sapiens	neuropeptide Y receptor Y5
7965224	RNU2-2	Homo sapiens	RNA, U2 small nuclear 1; RNA, U2 small nuclear 2
7965224	RNU2-1	Homo sapiens	RNA, U2 small nuclear 1; RNA, U2 small nuclear 2
7906930	NUF2	Homo sapiens	NUF2, NDC80 kinetochore complex component, homolog (S. cerevisiae)
8019857	NDC80	Homo sapiens	NDC80 homolog, kinetochore complex component (S. cerevisiae)
8122136	rps12	Homo sapiens	ribosomal protein S12; ribosomal protein S12 pseudogene 4; ribosomal protein S12 pseudogene 11; ribosomal protein S12 pseudogene 9
8122136	RPS12P11	Homo sapiens	ribosomal protein S12; ribosomal protein S12 pseudogene 4; ribosomal protein S12 pseudogene 11; ribosomal protein S12 pseudogene 9
8122136	RPS12P4	Homo sapiens	ribosomal protein S12; ribosomal protein S12 pseudogene 4; ribosomal protein S12 pseudogene 11; ribosomal protein S12 pseudogene 9
8122136	RPS12P9	Homo sapiens	ribosomal protein S12; ribosomal protein S12 pseudogene 4; ribosomal protein S12 pseudogene 11; ribosomal protein S12 pseudogene 9
8100557	TECRL	Homo sapiens	steroid 5 alpha-reductase 2-like 2
8112491	GUSBL1	Homo sapiens	glucuronidase, beta-like 1
7895824	EIF4G2	Homo sapiens	eukaryotic translation initiation factor 4 gamma, 2
7895110	Arf1	Homo sapiens	ADP-ribosylation factor 1
7922870	C1orf25	Homo sapiens	chromosome 1 open reading frame 25
8152079	PABPC1	Homo sapiens	poly(A) binding protein, cytoplasmic pseudogene 5; poly(A) binding protein, cytoplasmic 1
8152079	PABPC1P4	Homo sapiens	poly(A) binding protein, cytoplasmic pseudogene 5; poly(A) binding protein, cytoplasmic 1
8134403	RNU6-2	Homo sapiens	RNA, U6 small nuclear 2; RNA, U6 small nuclear 1
8134403	RNU6-1	Homo sapiens	RNA, U6 small nuclear 2; RNA, U6 small nuclear 1
7962013	ergic2	Homo sapiens	ERGIC and golgi 2
7894430	SNORD58B	Homo sapiens	U58 small nucleolar RNA; small nucleolar RNA, C/D box 58C; small nucleolar RNA, C/D box 58A; small nucleolar RNA, C/D box 58B
7894430	SNORD58A	Homo sapiens	U58 small nucleolar RNA; small nucleolar RNA, C/D box 58C; small nucleolar RNA, C/D box 58A; small nucleolar RNA, C/D box 58B
7894430	SNORD58C	Homo sapiens	U58 small nucleolar RNA; small nucleolar RNA, C/D box 58C; small nucleolar RNA, C/D box 58A; small nucleolar RNA, C/D box 58B
7894430	U58	Homo sapiens	U58 small nucleolar RNA; small nucleolar RNA, C/D box 58C; small nucleolar RNA, C/D box 58A; small nucleolar RNA, C/D box 58B
7894431	Prpf8	Homo sapiens	PRP8 pre-mRNA processing factor 8 homolog (S. cerevisiae)
8000369	SNORA1	Homo sapiens	small nucleolar RNA, H/ACA box 1
8138941	NT5C3	Homo sapiens	5'-nucleotidase, cytosolic III
7894436	hnrnpm	Homo sapiens	heterogeneous nuclear ribonucleoprotein M
7894439	Hnrnpc	Homo sapiens	heterogeneous nuclear ribonucleoprotein C (C1/C2)
8089372	kiaa1524	Homo sapiens	KIAA1524
8146328	RNU6-2	Homo sapiens	RNA, U6 small nuclear 2; RNA, U6 small nuclear 1
8146328	RNU6-1	Homo sapiens	RNA, U6 small nuclear 2; RNA, U6 small nuclear 1
7895857	SNRNP200	Homo sapiens	similar to U5 snRNP-specific protein, 200 kDa; small nuclear ribonucleoprotein 200kDa (U5)
7895857	LOC652147	Homo sapiens	similar to U5 snRNP-specific protein, 200 kDa; small nuclear ribonucleoprotein 200kDa (U5)
8057517	NCKAP1	Homo sapiens	NCK-associated protein 1
7894419	hnrnpm	Homo sapiens	heterogeneous nuclear ribonucleoprotein M
8108627	VTRNA1-3	Homo sapiens	vault RNA 1-3; vault RNA 1-1; vault RNA 1-2
8108627	VTRNA1-2	Homo sapiens	vault RNA 1-3; vault RNA 1-1; vault RNA 1-2
8108627	VTRNA1-1	Homo sapiens	vault RNA 1-3; vault RNA 1-1; vault RNA 1-2
7991754	HBZ	Homo sapiens	hemoglobin, zeta
7895121	RPL35P2	Homo sapiens	ribosomal protein L35; ribosomal protein L35 pseudogene 1; ribosomal protein L35 pseudogene 2
7895121	RPL35P1	Homo sapiens	ribosomal protein L35; ribosomal protein L35 pseudogene 1; ribosomal protein L35 pseudogene 2
7895121	rpl35	Homo sapiens	ribosomal protein L35; ribosomal protein L35 pseudogene 1; ribosomal protein L35 pseudogene 2
8154951	GLUL	Homo sapiens	glutamate-ammonia ligase (glutamine synthetase)
7894421	Prpf8	Homo sapiens	PRP8 pre-mRNA processing factor 8 homolog (S. cerevisiae)
7922887	RNY4P7	Homo sapiens	hypothetical LOC100271832; RNA, Ro-associated Y5 pseudogene 10; RNA, Ro-associated Y1; RNA, Ro-associated Y4 pseudogene 7; RNA, Ro-associated Y4 pseudogene 19; RNA, Ro-associated Y3; hypothetical LOC100132111; RNA, Ro-associated Y4
7922887	LOC100271832	Homo sapiens	hypothetical LOC100271832; RNA, Ro-associated Y5 pseudogene 10; RNA, Ro-associated Y1; RNA, Ro-associated Y4 pseudogene 7; RNA, Ro-associated Y4 pseudogene 19; RNA, Ro-associated Y3; hypothetical LOC100132111; RNA, Ro-associated Y4
7922887	RNY5P10	Homo sapiens	hypothetical LOC100271832; RNA, Ro-associated Y5 pseudogene 10; RNA, Ro-associated Y1; RNA, Ro-associated Y4 pseudogene 7; RNA, Ro-associated Y4 pseudogene 19; RNA, Ro-associated Y3; hypothetical LOC100132111; RNA, Ro-associated Y4
7922887	RNY1	Homo sapiens	hypothetical LOC100271832; RNA, Ro-associated Y5 pseudogene 10; RNA, Ro-associated Y1; RNA, Ro-associated Y4 pseudogene 7; RNA, Ro-associated Y4 pseudogene 19; RNA, Ro-associated Y3; hypothetical LOC100132111; RNA, Ro-associated Y4
7922887	LOC100132111	Homo sapiens	hypothetical LOC100271832; RNA, Ro-associated Y5 pseudogene 10; RNA, Ro-associated Y1; RNA, Ro-associated Y4 pseudogene 7; RNA, Ro-associated Y4 pseudogene 19; RNA, Ro-associated Y3; hypothetical LOC100132111; RNA, Ro-associated Y4
7922887	RNY4P19	Homo sapiens	hypothetical LOC100271832; RNA, Ro-associated Y5 pseudogene 10; RNA, Ro-associated Y1; RNA, Ro-associated Y4 pseudogene 7; RNA, Ro-associated Y4 pseudogene 19; RNA, Ro-associated Y3; hypothetical LOC100132111; RNA, Ro-associated Y4
7922887	RNY3	Homo sapiens	hypothetical LOC100271832; RNA, Ro-associated Y5 pseudogene 10; RNA, Ro-associated Y1; RNA, Ro-associated Y4 pseudogene 7; RNA, Ro-associated Y4 pseudogene 19; RNA, Ro-associated Y3; hypothetical LOC100132111; RNA, Ro-associated Y4
7922887	RNY4	Homo sapiens	hypothetical LOC100271832; RNA, Ro-associated Y5 pseudogene 10; RNA, Ro-associated Y1; RNA, Ro-associated Y4 pseudogene 7; RNA, Ro-associated Y4 pseudogene 19; RNA, Ro-associated Y3; hypothetical LOC100132111; RNA, Ro-associated Y4
8064100	Ppdpf	Homo sapiens	pancreatic progenitor cell differentiation and proliferation factor homolog (zebrafish)
8013013	RNU6-2	Homo sapiens	RNA, U6 small nuclear 2; RNA, U6 small nuclear 1
8013013	RNU6-1	Homo sapiens	RNA, U6 small nuclear 2; RNA, U6 small nuclear 1
8029129	rps19	Homo sapiens	ribosomal protein S19 pseudogene 3; ribosomal protein S19
8029129	RPS19P3	Homo sapiens	ribosomal protein S19 pseudogene 3; ribosomal protein S19
8158952	EEF1A1	Homo sapiens	eukaryotic translation elongation factor 1 alpha-like 7; eukaryotic translation elongation factor 1 alpha-like 3; similar to eukaryotic translation elongation factor 1 alpha 1; eukaryotic translation elongation factor 1 alpha 1
8158952	EEF1A1P9	Homo sapiens	eukaryotic translation elongation factor 1 alpha-like 7; eukaryotic translation elongation factor 1 alpha-like 3; similar to eukaryotic translation elongation factor 1 alpha 1; eukaryotic translation elongation factor 1 alpha 1
8158952	EEF1A1P5	Homo sapiens	eukaryotic translation elongation factor 1 alpha-like 7; eukaryotic translation elongation factor 1 alpha-like 3; similar to eukaryotic translation elongation factor 1 alpha 1; eukaryotic translation elongation factor 1 alpha 1
8158952	EEF1A1P24	Homo sapiens	eukaryotic translation elongation factor 1 alpha-like 7; eukaryotic translation elongation factor 1 alpha-like 3; similar to eukaryotic translation elongation factor 1 alpha 1; eukaryotic translation elongation factor 1 alpha 1
7979804	RN7SL1	Homo sapiens	RNA, 7SL, cytoplasmic 2; RNA, 7SL, cytoplasmic 1
7979804	RN7SL2	Homo sapiens	RNA, 7SL, cytoplasmic 2; RNA, 7SL, cytoplasmic 1
8100578	Epha5	Homo sapiens	EPH receptor A5
8095331	RNY4P7	Homo sapiens	hypothetical LOC100271832; RNA, Ro-associated Y5 pseudogene 10; RNA, Ro-associated Y1; RNA, Ro-associated Y4 pseudogene 7; RNA, Ro-associated Y4 pseudogene 19; RNA, Ro-associated Y3; hypothetical LOC100132111; RNA, Ro-associated Y4
8095331	LOC100271832	Homo sapiens	hypothetical LOC100271832; RNA, Ro-associated Y5 pseudogene 10; RNA, Ro-associated Y1; RNA, Ro-associated Y4 pseudogene 7; RNA, Ro-associated Y4 pseudogene 19; RNA, Ro-associated Y3; hypothetical LOC100132111; RNA, Ro-associated Y4
8095331	RNY5P10	Homo sapiens	hypothetical LOC100271832; RNA, Ro-associated Y5 pseudogene 10; RNA, Ro-associated Y1; RNA, Ro-associated Y4 pseudogene 7; RNA, Ro-associated Y4 pseudogene 19; RNA, Ro-associated Y3; hypothetical LOC100132111; RNA, Ro-associated Y4
8095331	RNY1	Homo sapiens	hypothetical LOC100271832; RNA, Ro-associated Y5 pseudogene 10; RNA, Ro-associated Y1; RNA, Ro-associated Y4 pseudogene 7; RNA, Ro-associated Y4 pseudogene 19; RNA, Ro-associated Y3; hypothetical LOC100132111; RNA, Ro-associated Y4
8095331	LOC100132111	Homo sapiens	hypothetical LOC100271832; RNA, Ro-associated Y5 pseudogene 10; RNA, Ro-associated Y1; RNA, Ro-associated Y4 pseudogene 7; RNA, Ro-associated Y4 pseudogene 19; RNA, Ro-associated Y3; hypothetical LOC100132111; RNA, Ro-associated Y4
8095331	RNY4P19	Homo sapiens	hypothetical LOC100271832; RNA, Ro-associated Y5 pseudogene 10; RNA, Ro-associated Y1; RNA, Ro-associated Y4 pseudogene 7; RNA, Ro-associated Y4 pseudogene 19; RNA, Ro-associated Y3; hypothetical LOC100132111; RNA, Ro-associated Y4
8095331	RNY3	Homo sapiens	hypothetical LOC100271832; RNA, Ro-associated Y5 pseudogene 10; RNA, Ro-associated Y1; RNA, Ro-associated Y4 pseudogene 7; RNA, Ro-associated Y4 pseudogene 19; RNA, Ro-associated Y3; hypothetical LOC100132111; RNA, Ro-associated Y4
8095331	RNY4	Homo sapiens	hypothetical LOC100271832; RNA, Ro-associated Y5 pseudogene 10; RNA, Ro-associated Y1; RNA, Ro-associated Y4 pseudogene 7; RNA, Ro-associated Y4 pseudogene 19; RNA, Ro-associated Y3; hypothetical LOC100132111; RNA, Ro-associated Y4
7895847	ZNF259	Homo sapiens	zinc finger protein 259
8082478	CopG	Homo sapiens	coatomer protein complex, subunit gamma
8127380	LGSN	Homo sapiens	lengsin, lens protein with glutamine synthetase domain
7895133	STARD7	Homo sapiens	StAR-related lipid transfer (START) domain containing 7
7965231	MGAT4C	Homo sapiens	mannosyl (alpha-1,3-)-glycoprotein beta-1,4-N-acetylglucosaminyltransferase, isozyme C (putative)
7988605	COPS2	Homo sapiens	COP9 constitutive photomorphogenic homolog subunit 2 (Arabidopsis)
8094278	NCAPG	Homo sapiens	non-SMC condensin I complex, subunit G
8095723	EPGN	Homo sapiens	epithelial mitogen homolog (mouse)
8098006	GLRB	Homo sapiens	glycine receptor, beta
7894416	Jtb	Homo sapiens	jumping translocation breakpoint
8142538	RNU6-2	Homo sapiens	RNA, U6 small nuclear 2; RNA, U6 small nuclear 1
8142538	RNU6-1	Homo sapiens	RNA, U6 small nuclear 2; RNA, U6 small nuclear 1
7894411	EIF4G2	Homo sapiens	eukaryotic translation initiation factor 4 gamma, 2
7894412	C2orf24	Homo sapiens	chromosome 2 open reading frame 24
7954810	Lrrk2	Homo sapiens	leucine-rich repeat kinase 2
7894413	Arf1	Homo sapiens	ADP-ribosylation factor 1
7965264	CEP290	Homo sapiens	centrosomal protein 290kDa
8081331	RNU6-2	Homo sapiens	RNA, U6 small nuclear 2; RNA, U6 small nuclear 1
8081331	RNU6-1	Homo sapiens	RNA, U6 small nuclear 2; RNA, U6 small nuclear 1
8061066	RNU6-2	Homo sapiens	RNA, U6 small nuclear 2; RNA, U6 small nuclear 1
8061066	RNU6-1	Homo sapiens	RNA, U6 small nuclear 2; RNA, U6 small nuclear 1
8081337	RNY4P7	Homo sapiens	hypothetical LOC100271832; RNA, Ro-associated Y5 pseudogene 10; RNA, Ro-associated Y1; RNA, Ro-associated Y4 pseudogene 7; RNA, Ro-associated Y4 pseudogene 19; RNA, Ro-associated Y3; hypothetical LOC100132111; RNA, Ro-associated Y4
8081337	LOC100271832	Homo sapiens	hypothetical LOC100271832; RNA, Ro-associated Y5 pseudogene 10; RNA, Ro-associated Y1; RNA, Ro-associated Y4 pseudogene 7; RNA, Ro-associated Y4 pseudogene 19; RNA, Ro-associated Y3; hypothetical LOC100132111; RNA, Ro-associated Y4
8081337	RNY5P10	Homo sapiens	hypothetical LOC100271832; RNA, Ro-associated Y5 pseudogene 10; RNA, Ro-associated Y1; RNA, Ro-associated Y4 pseudogene 7; RNA, Ro-associated Y4 pseudogene 19; RNA, Ro-associated Y3; hypothetical LOC100132111; RNA, Ro-associated Y4
8081337	RNY1	Homo sapiens	hypothetical LOC100271832; RNA, Ro-associated Y5 pseudogene 10; RNA, Ro-associated Y1; RNA, Ro-associated Y4 pseudogene 7; RNA, Ro-associated Y4 pseudogene 19; RNA, Ro-associated Y3; hypothetical LOC100132111; RNA, Ro-associated Y4
8081337	LOC100132111	Homo sapiens	hypothetical LOC100271832; RNA, Ro-associated Y5 pseudogene 10; RNA, Ro-associated Y1; RNA, Ro-associated Y4 pseudogene 7; RNA, Ro-associated Y4 pseudogene 19; RNA, Ro-associated Y3; hypothetical LOC100132111; RNA, Ro-associated Y4
8081337	RNY4P19	Homo sapiens	hypothetical LOC100271832; RNA, Ro-associated Y5 pseudogene 10; RNA, Ro-associated Y1; RNA, Ro-associated Y4 pseudogene 7; RNA, Ro-associated Y4 pseudogene 19; RNA, Ro-associated Y3; hypothetical LOC100132111; RNA, Ro-associated Y4
8081337	RNY3	Homo sapiens	hypothetical LOC100271832; RNA, Ro-associated Y5 pseudogene 10; RNA, Ro-associated Y1; RNA, Ro-associated Y4 pseudogene 7; RNA, Ro-associated Y4 pseudogene 19; RNA, Ro-associated Y3; hypothetical LOC100132111; RNA, Ro-associated Y4
8081337	RNY4	Homo sapiens	hypothetical LOC100271832; RNA, Ro-associated Y5 pseudogene 10; RNA, Ro-associated Y1; RNA, Ro-associated Y4 pseudogene 7; RNA, Ro-associated Y4 pseudogene 19; RNA, Ro-associated Y3; hypothetical LOC100132111; RNA, Ro-associated Y4
8155602	C21orf81	Homo sapiens	hCG2042718; chromosome 21 open reading frame 81; ankyrin repeat domain 20 family, member A1; ankyrin repeat domain 20 family, member A3; ankyrin repeat domain 20 family, member A2
8155602	ANKRD20A1	Homo sapiens	hCG2042718; chromosome 21 open reading frame 81; ankyrin repeat domain 20 family, member A1; ankyrin repeat domain 20 family, member A3; ankyrin repeat domain 20 family, member A2
8155602	ANKRD20A2	Homo sapiens	hCG2042718; chromosome 21 open reading frame 81; ankyrin repeat domain 20 family, member A1; ankyrin repeat domain 20 family, member A3; ankyrin repeat domain 20 family, member A2
8155602	ANKRD20A3	Homo sapiens	hCG2042718; chromosome 21 open reading frame 81; ankyrin repeat domain 20 family, member A1; ankyrin repeat domain 20 family, member A3; ankyrin repeat domain 20 family, member A2
8155602	LOC642204	Homo sapiens	hCG2042718; chromosome 21 open reading frame 81; ankyrin repeat domain 20 family, member A1; ankyrin repeat domain 20 family, member A3; ankyrin repeat domain 20 family, member A2
7899160	Cd52	Homo sapiens	CD52 molecule
7938286	RPL27A	Homo sapiens	ribosomal protein L27a
7894489	Prpf8	Homo sapiens	PRP8 pre-mRNA processing factor 8 homolog (S. cerevisiae)
8095395	UGT2B7	Homo sapiens	UDP glucuronosyltransferase 2 family, polypeptide B7
8021286	C18orf54	Homo sapiens	chromosome 18 open reading frame 54
8166876	DDX3X	Homo sapiens	DEAD (Asp-Glu-Ala-Asp) box polypeptide 3, X-linked
8148208	Fam91a1	Homo sapiens	family with sequence similarity 91, member A1
8095390	UGT2B10	Homo sapiens	UDP glucuronosyltransferase 2 family, polypeptide B10
7894485	LOC399804	Homo sapiens	nucleophosmin 1 (nucleolar phosphoprotein B23, numatrin) pseudogene 21; hypothetical LOC100131044; similar to nucleophosmin 1; nucleophosmin (nucleolar phosphoprotein B23, numatrin)
7894485	LOC100131044	Homo sapiens	nucleophosmin 1 (nucleolar phosphoprotein B23, numatrin) pseudogene 21; hypothetical LOC100131044; similar to nucleophosmin 1; nucleophosmin (nucleolar phosphoprotein B23, numatrin)
7894485	LOC729686	Homo sapiens	nucleophosmin 1 (nucleolar phosphoprotein B23, numatrin) pseudogene 21; hypothetical LOC100131044; similar to nucleophosmin 1; nucleophosmin (nucleolar phosphoprotein B23, numatrin)
7894485	Npm1	Homo sapiens	nucleophosmin 1 (nucleolar phosphoprotein B23, numatrin) pseudogene 21; hypothetical LOC100131044; similar to nucleophosmin 1; nucleophosmin (nucleolar phosphoprotein B23, numatrin)
7894485	LOC729342	Homo sapiens	nucleophosmin 1 (nucleolar phosphoprotein B23, numatrin) pseudogene 21; hypothetical LOC100131044; similar to nucleophosmin 1; nucleophosmin (nucleolar phosphoprotein B23, numatrin)
7894485	NPM1P21	Homo sapiens	nucleophosmin 1 (nucleolar phosphoprotein B23, numatrin) pseudogene 21; hypothetical LOC100131044; similar to nucleophosmin 1; nucleophosmin (nucleolar phosphoprotein B23, numatrin)
7894485	LOC440577	Homo sapiens	nucleophosmin 1 (nucleolar phosphoprotein B23, numatrin) pseudogene 21; hypothetical LOC100131044; similar to nucleophosmin 1; nucleophosmin (nucleolar phosphoprotein B23, numatrin)
8105633	PPWD1	Homo sapiens	peptidylprolyl isomerase domain and WD repeat containing 1
8060395	RAD21L1	Homo sapiens	syntaphilin; RAD21-like 1 (S. pombe)
8060395	SNPH	Homo sapiens	syntaphilin; RAD21-like 1 (S. pombe)
7984562	rplp1	Homo sapiens	ribosomal protein, large, P1
8150872	rps20	Homo sapiens	ribosomal protein S20
7894479	Ndufa2	Homo sapiens	NADH dehydrogenase (ubiquinone) 1 alpha subcomplex, 2, 8kDa
8021297	C18orf26	Homo sapiens	chromosome 18 open reading frame 26
7938291	SNORA45	Homo sapiens	small nucleolar RNA, H/ACA box 45; small nucleolar RNA, H/ACA box 3
7938291	SNORA3	Homo sapiens	small nucleolar RNA, H/ACA box 45; small nucleolar RNA, H/ACA box 3
8127364	GUSBP1	Homo sapiens	glucuronidase, beta-like 2; glucuronidase, beta pseudogene
8127364	GUSBL2	Homo sapiens	glucuronidase, beta-like 2; glucuronidase, beta pseudogene
7895547	Canx	Homo sapiens	calnexin
7894471	oaz1	Homo sapiens	ornithine decarboxylase antizyme 1
7979811	RNU6-2	Homo sapiens	RNA, U6 small nuclear 2; RNA, U6 small nuclear 1
7979811	RNU6-1	Homo sapiens	RNA, U6 small nuclear 2; RNA, U6 small nuclear 1
7895548	ANAPC5	Homo sapiens	anaphase promoting complex subunit 5
7928630	eif5a	Homo sapiens	eukaryotic translation initiation factor 5A; eukaryotic translation initiation factor 5A-like 1
7928630	EIF5AL1	Homo sapiens	eukaryotic translation initiation factor 5A; eukaryotic translation initiation factor 5A-like 1
7986642	GOLGA8E	Homo sapiens	golgi autoantigen, golgin subfamily a, 8E
8121225	grik2	Homo sapiens	glutamate receptor, ionotropic, kainate 2
7895162	Prpf8	Homo sapiens	PRP8 pre-mRNA processing factor 8 homolog (S. cerevisiae)
7985480	SCARNA15	Homo sapiens	small Cajal body-specific RNA 15
8131539	tmem106b	Homo sapiens	transmembrane protein 106B
7894469	LOC390282	Homo sapiens	eukaryotic translation initiation factor 3, subunit F; similar to hCG2040283
7894469	Eif3f	Homo sapiens	eukaryotic translation initiation factor 3, subunit F; similar to hCG2040283
8057563	ZSWIM2	Homo sapiens	zinc finger, SWIM-type containing 2
7895806	ERH	Homo sapiens	enhancer of rudimentary homolog (Drosophila)
8056457	Scn1a	Homo sapiens	sodium channel, voltage-gated, type I, alpha subunit
7895160	SMNDC1	Homo sapiens	survival motor neuron domain containing 1
8024019	Ptbp1	Homo sapiens	polypyrimidine tract binding protein 1
7913712	SFRS13A	Homo sapiens	FUS interacting protein (serine/arginine-rich) 1; similar to FUS interacting protein (serine-arginine rich) 1
7913712	LOC653884	Homo sapiens	FUS interacting protein (serine/arginine-rich) 1; similar to FUS interacting protein (serine-arginine rich) 1
8120600	RNU6-2	Homo sapiens	RNA, U6 small nuclear 2; RNA, U6 small nuclear 1
8120600	RNU6-1	Homo sapiens	RNA, U6 small nuclear 2; RNA, U6 small nuclear 1
7895802	LRRC37A4	Homo sapiens	leucine rich repeat containing 37, member A4 (pseudogene)
8095356	SNORA62	Homo sapiens	small nucleolar RNA, H/ACA box 62; small nucleolar RNA, H/ACA box 6
8095356	SNORA6	Homo sapiens	small nucleolar RNA, H/ACA box 62; small nucleolar RNA, H/ACA box 6
7894459	LOC643446	Homo sapiens	similar to ribonucleic acid binding protein S1; RNA binding protein S1, serine-rich domain
7894459	RnpS1	Homo sapiens	similar to ribonucleic acid binding protein S1; RNA binding protein S1, serine-rich domain
7973012	OR4K2	Homo sapiens	olfactory receptor, family 4, subfamily K, member 2
7895170	RPL30P8	Homo sapiens	ribosomal protein L30 pseudogene 8
7894451	TARDBP	Homo sapiens	TAR DNA binding protein
8009474	ABCA10	Homo sapiens	ATP-binding cassette, sub-family A (ABC1), member 10
8156290	CKS2	Homo sapiens	CDC28 protein kinase regulatory subunit 2
8113591	Pggt1b	Homo sapiens	protein geranylgeranyltransferase type I, beta subunit
7975154	C14orf53	Homo sapiens	chromosome 14 open reading frame 53
7895072	SFRS9	Homo sapiens	splicing factor, arginine/serine-rich 9
8021372	RNU6-2	Homo sapiens	RNA, U6 small nuclear 2; RNA, U6 small nuclear 1
8021372	RNU6-1	Homo sapiens	RNA, U6 small nuclear 2; RNA, U6 small nuclear 1
7954794	c12orf4	Homo sapiens	chromosome 12 open reading frame 40; chromosome 12 open reading frame 4
7954794	C12orf40	Homo sapiens	chromosome 12 open reading frame 40; chromosome 12 open reading frame 4
8105681	Erbb2ip	Homo sapiens	erbb2 interacting protein
7933855	RTKN2	Homo sapiens	rhotekin 2
7927008	CCNY	Homo sapiens	cyclin Y
7893792	RPL24P2	Homo sapiens	ribosomal protein L24 pseudogene 2
8128445	RNY4P7	Homo sapiens	hypothetical LOC100271832; RNA, Ro-associated Y5 pseudogene 10; RNA, Ro-associated Y1; RNA, Ro-associated Y4 pseudogene 7; RNA, Ro-associated Y4 pseudogene 19; RNA, Ro-associated Y3; hypothetical LOC100132111; RNA, Ro-associated Y4
8128445	LOC100271832	Homo sapiens	hypothetical LOC100271832; RNA, Ro-associated Y5 pseudogene 10; RNA, Ro-associated Y1; RNA, Ro-associated Y4 pseudogene 7; RNA, Ro-associated Y4 pseudogene 19; RNA, Ro-associated Y3; hypothetical LOC100132111; RNA, Ro-associated Y4
8128445	RNY5P10	Homo sapiens	hypothetical LOC100271832; RNA, Ro-associated Y5 pseudogene 10; RNA, Ro-associated Y1; RNA, Ro-associated Y4 pseudogene 7; RNA, Ro-associated Y4 pseudogene 19; RNA, Ro-associated Y3; hypothetical LOC100132111; RNA, Ro-associated Y4
8128445	RNY1	Homo sapiens	hypothetical LOC100271832; RNA, Ro-associated Y5 pseudogene 10; RNA, Ro-associated Y1; RNA, Ro-associated Y4 pseudogene 7; RNA, Ro-associated Y4 pseudogene 19; RNA, Ro-associated Y3; hypothetical LOC100132111; RNA, Ro-associated Y4
8128445	LOC100132111	Homo sapiens	hypothetical LOC100271832; RNA, Ro-associated Y5 pseudogene 10; RNA, Ro-associated Y1; RNA, Ro-associated Y4 pseudogene 7; RNA, Ro-associated Y4 pseudogene 19; RNA, Ro-associated Y3; hypothetical LOC100132111; RNA, Ro-associated Y4
8128445	RNY4P19	Homo sapiens	hypothetical LOC100271832; RNA, Ro-associated Y5 pseudogene 10; RNA, Ro-associated Y1; RNA, Ro-associated Y4 pseudogene 7; RNA, Ro-associated Y4 pseudogene 19; RNA, Ro-associated Y3; hypothetical LOC100132111; RNA, Ro-associated Y4
8128445	RNY3	Homo sapiens	hypothetical LOC100271832; RNA, Ro-associated Y5 pseudogene 10; RNA, Ro-associated Y1; RNA, Ro-associated Y4 pseudogene 7; RNA, Ro-associated Y4 pseudogene 19; RNA, Ro-associated Y3; hypothetical LOC100132111; RNA, Ro-associated Y4
8128445	RNY4	Homo sapiens	hypothetical LOC100271832; RNA, Ro-associated Y5 pseudogene 10; RNA, Ro-associated Y1; RNA, Ro-associated Y4 pseudogene 7; RNA, Ro-associated Y4 pseudogene 19; RNA, Ro-associated Y3; hypothetical LOC100132111; RNA, Ro-associated Y4
8047097	GLS	Homo sapiens	glutaminase
7892630	GDI2	Homo sapiens	GDP dissociation inhibitor 2
7981909	RN7SL1	Homo sapiens	RNA, 7SL, cytoplasmic 2; RNA, 7SL, cytoplasmic 1
7981909	RN7SL2	Homo sapiens	RNA, 7SL, cytoplasmic 2; RNA, 7SL, cytoplasmic 1
8113157	TTC37	Homo sapiens	tetratricopeptide repeat domain 37
7892639	nonO	Homo sapiens	non-POU domain containing, octamer-binding
8178977	Tapbp	Homo sapiens	TAP binding protein (tapasin)
8146069	ADAM18	Homo sapiens	ADAM metallopeptidase domain 18
7939998	OR5AK3P	Homo sapiens	olfactory receptor, family 5, subfamily AK, member 3 pseudogene
7954785	RN5S10	Homo sapiens	RNA, 5S ribosomal 9; RNA, 5S ribosomal 13; RNA, 5S ribosomal 12; RNA, 5S ribosomal 11; RNA, 5S ribosomal 10; RNA, 5S ribosomal 17; RNA, 5S ribosomal 16; RNA, 5S ribosomal 15; RNA, 5S ribosomal 14; RNA, 5S ribosomal 1; RNA, 5S ribosomal 2; RNA, 5S ribosomal 3; RNA, 5S ribosomal 4; RNA, 5S ribosomal 5; RNA, 5S ribosomal 6; RNA, 5S ribosomal 7; RNA, 5S ribosomal 8
7954785	RN5S11	Homo sapiens	RNA, 5S ribosomal 9; RNA, 5S ribosomal 13; RNA, 5S ribosomal 12; RNA, 5S ribosomal 11; RNA, 5S ribosomal 10; RNA, 5S ribosomal 17; RNA, 5S ribosomal 16; RNA, 5S ribosomal 15; RNA, 5S ribosomal 14; RNA, 5S ribosomal 1; RNA, 5S ribosomal 2; RNA, 5S ribosomal 3; RNA, 5S ribosomal 4; RNA, 5S ribosomal 5; RNA, 5S ribosomal 6; RNA, 5S ribosomal 7; RNA, 5S ribosomal 8
7954785	RN5S12	Homo sapiens	RNA, 5S ribosomal 9; RNA, 5S ribosomal 13; RNA, 5S ribosomal 12; RNA, 5S ribosomal 11; RNA, 5S ribosomal 10; RNA, 5S ribosomal 17; RNA, 5S ribosomal 16; RNA, 5S ribosomal 15; RNA, 5S ribosomal 14; RNA, 5S ribosomal 1; RNA, 5S ribosomal 2; RNA, 5S ribosomal 3; RNA, 5S ribosomal 4; RNA, 5S ribosomal 5; RNA, 5S ribosomal 6; RNA, 5S ribosomal 7; RNA, 5S ribosomal 8
7954785	RN5S13	Homo sapiens	RNA, 5S ribosomal 9; RNA, 5S ribosomal 13; RNA, 5S ribosomal 12; RNA, 5S ribosomal 11; RNA, 5S ribosomal 10; RNA, 5S ribosomal 17; RNA, 5S ribosomal 16; RNA, 5S ribosomal 15; RNA, 5S ribosomal 14; RNA, 5S ribosomal 1; RNA, 5S ribosomal 2; RNA, 5S ribosomal 3; RNA, 5S ribosomal 4; RNA, 5S ribosomal 5; RNA, 5S ribosomal 6; RNA, 5S ribosomal 7; RNA, 5S ribosomal 8
7954785	RN5S14	Homo sapiens	RNA, 5S ribosomal 9; RNA, 5S ribosomal 13; RNA, 5S ribosomal 12; RNA, 5S ribosomal 11; RNA, 5S ribosomal 10; RNA, 5S ribosomal 17; RNA, 5S ribosomal 16; RNA, 5S ribosomal 15; RNA, 5S ribosomal 14; RNA, 5S ribosomal 1; RNA, 5S ribosomal 2; RNA, 5S ribosomal 3; RNA, 5S ribosomal 4; RNA, 5S ribosomal 5; RNA, 5S ribosomal 6; RNA, 5S ribosomal 7; RNA, 5S ribosomal 8
7954785	RN5S15	Homo sapiens	RNA, 5S ribosomal 9; RNA, 5S ribosomal 13; RNA, 5S ribosomal 12; RNA, 5S ribosomal 11; RNA, 5S ribosomal 10; RNA, 5S ribosomal 17; RNA, 5S ribosomal 16; RNA, 5S ribosomal 15; RNA, 5S ribosomal 14; RNA, 5S ribosomal 1; RNA, 5S ribosomal 2; RNA, 5S ribosomal 3; RNA, 5S ribosomal 4; RNA, 5S ribosomal 5; RNA, 5S ribosomal 6; RNA, 5S ribosomal 7; RNA, 5S ribosomal 8
7954785	RN5S16	Homo sapiens	RNA, 5S ribosomal 9; RNA, 5S ribosomal 13; RNA, 5S ribosomal 12; RNA, 5S ribosomal 11; RNA, 5S ribosomal 10; RNA, 5S ribosomal 17; RNA, 5S ribosomal 16; RNA, 5S ribosomal 15; RNA, 5S ribosomal 14; RNA, 5S ribosomal 1; RNA, 5S ribosomal 2; RNA, 5S ribosomal 3; RNA, 5S ribosomal 4; RNA, 5S ribosomal 5; RNA, 5S ribosomal 6; RNA, 5S ribosomal 7; RNA, 5S ribosomal 8
7954785	RN5S6	Homo sapiens	RNA, 5S ribosomal 9; RNA, 5S ribosomal 13; RNA, 5S ribosomal 12; RNA, 5S ribosomal 11; RNA, 5S ribosomal 10; RNA, 5S ribosomal 17; RNA, 5S ribosomal 16; RNA, 5S ribosomal 15; RNA, 5S ribosomal 14; RNA, 5S ribosomal 1; RNA, 5S ribosomal 2; RNA, 5S ribosomal 3; RNA, 5S ribosomal 4; RNA, 5S ribosomal 5; RNA, 5S ribosomal 6; RNA, 5S ribosomal 7; RNA, 5S ribosomal 8
7954785	RN5S7	Homo sapiens	RNA, 5S ribosomal 9; RNA, 5S ribosomal 13; RNA, 5S ribosomal 12; RNA, 5S ribosomal 11; RNA, 5S ribosomal 10; RNA, 5S ribosomal 17; RNA, 5S ribosomal 16; RNA, 5S ribosomal 15; RNA, 5S ribosomal 14; RNA, 5S ribosomal 1; RNA, 5S ribosomal 2; RNA, 5S ribosomal 3; RNA, 5S ribosomal 4; RNA, 5S ribosomal 5; RNA, 5S ribosomal 6; RNA, 5S ribosomal 7; RNA, 5S ribosomal 8
7954785	RN5S8	Homo sapiens	RNA, 5S ribosomal 9; RNA, 5S ribosomal 13; RNA, 5S ribosomal 12; RNA, 5S ribosomal 11; RNA, 5S ribosomal 10; RNA, 5S ribosomal 17; RNA, 5S ribosomal 16; RNA, 5S ribosomal 15; RNA, 5S ribosomal 14; RNA, 5S ribosomal 1; RNA, 5S ribosomal 2; RNA, 5S ribosomal 3; RNA, 5S ribosomal 4; RNA, 5S ribosomal 5; RNA, 5S ribosomal 6; RNA, 5S ribosomal 7; RNA, 5S ribosomal 8
7954785	RN5S9	Homo sapiens	RNA, 5S ribosomal 9; RNA, 5S ribosomal 13; RNA, 5S ribosomal 12; RNA, 5S ribosomal 11; RNA, 5S ribosomal 10; RNA, 5S ribosomal 17; RNA, 5S ribosomal 16; RNA, 5S ribosomal 15; RNA, 5S ribosomal 14; RNA, 5S ribosomal 1; RNA, 5S ribosomal 2; RNA, 5S ribosomal 3; RNA, 5S ribosomal 4; RNA, 5S ribosomal 5; RNA, 5S ribosomal 6; RNA, 5S ribosomal 7; RNA, 5S ribosomal 8
7954785	RN5S2	Homo sapiens	RNA, 5S ribosomal 9; RNA, 5S ribosomal 13; RNA, 5S ribosomal 12; RNA, 5S ribosomal 11; RNA, 5S ribosomal 10; RNA, 5S ribosomal 17; RNA, 5S ribosomal 16; RNA, 5S ribosomal 15; RNA, 5S ribosomal 14; RNA, 5S ribosomal 1; RNA, 5S ribosomal 2; RNA, 5S ribosomal 3; RNA, 5S ribosomal 4; RNA, 5S ribosomal 5; RNA, 5S ribosomal 6; RNA, 5S ribosomal 7; RNA, 5S ribosomal 8
7954785	RN5S3	Homo sapiens	RNA, 5S ribosomal 9; RNA, 5S ribosomal 13; RNA, 5S ribosomal 12; RNA, 5S ribosomal 11; RNA, 5S ribosomal 10; RNA, 5S ribosomal 17; RNA, 5S ribosomal 16; RNA, 5S ribosomal 15; RNA, 5S ribosomal 14; RNA, 5S ribosomal 1; RNA, 5S ribosomal 2; RNA, 5S ribosomal 3; RNA, 5S ribosomal 4; RNA, 5S ribosomal 5; RNA, 5S ribosomal 6; RNA, 5S ribosomal 7; RNA, 5S ribosomal 8
7954785	RN5S4	Homo sapiens	RNA, 5S ribosomal 9; RNA, 5S ribosomal 13; RNA, 5S ribosomal 12; RNA, 5S ribosomal 11; RNA, 5S ribosomal 10; RNA, 5S ribosomal 17; RNA, 5S ribosomal 16; RNA, 5S ribosomal 15; RNA, 5S ribosomal 14; RNA, 5S ribosomal 1; RNA, 5S ribosomal 2; RNA, 5S ribosomal 3; RNA, 5S ribosomal 4; RNA, 5S ribosomal 5; RNA, 5S ribosomal 6; RNA, 5S ribosomal 7; RNA, 5S ribosomal 8
7954785	RN5S5	Homo sapiens	RNA, 5S ribosomal 9; RNA, 5S ribosomal 13; RNA, 5S ribosomal 12; RNA, 5S ribosomal 11; RNA, 5S ribosomal 10; RNA, 5S ribosomal 17; RNA, 5S ribosomal 16; RNA, 5S ribosomal 15; RNA, 5S ribosomal 14; RNA, 5S ribosomal 1; RNA, 5S ribosomal 2; RNA, 5S ribosomal 3; RNA, 5S ribosomal 4; RNA, 5S ribosomal 5; RNA, 5S ribosomal 6; RNA, 5S ribosomal 7; RNA, 5S ribosomal 8
7954785	RN5S1	Homo sapiens	RNA, 5S ribosomal 9; RNA, 5S ribosomal 13; RNA, 5S ribosomal 12; RNA, 5S ribosomal 11; RNA, 5S ribosomal 10; RNA, 5S ribosomal 17; RNA, 5S ribosomal 16; RNA, 5S ribosomal 15; RNA, 5S ribosomal 14; RNA, 5S ribosomal 1; RNA, 5S ribosomal 2; RNA, 5S ribosomal 3; RNA, 5S ribosomal 4; RNA, 5S ribosomal 5; RNA, 5S ribosomal 6; RNA, 5S ribosomal 7; RNA, 5S ribosomal 8
7954785	RN5S17	Homo sapiens	RNA, 5S ribosomal 9; RNA, 5S ribosomal 13; RNA, 5S ribosomal 12; RNA, 5S ribosomal 11; RNA, 5S ribosomal 10; RNA, 5S ribosomal 17; RNA, 5S ribosomal 16; RNA, 5S ribosomal 15; RNA, 5S ribosomal 14; RNA, 5S ribosomal 1; RNA, 5S ribosomal 2; RNA, 5S ribosomal 3; RNA, 5S ribosomal 4; RNA, 5S ribosomal 5; RNA, 5S ribosomal 6; RNA, 5S ribosomal 7; RNA, 5S ribosomal 8
7968516	PDS5B	Homo sapiens	PDS5, regulator of cohesion maintenance, homolog B (S. cerevisiae)
8134372	RNU4-2	Homo sapiens	RNA, U4 small nuclear 2; RNA, U4 small nuclear 1; RNA, U4 small nuclear 1B
8134372	RNU4-1	Homo sapiens	RNA, U4 small nuclear 2; RNA, U4 small nuclear 1; RNA, U4 small nuclear 1B
8134372	RNU4-1B	Homo sapiens	RNA, U4 small nuclear 2; RNA, U4 small nuclear 1; RNA, U4 small nuclear 1B
7919392	RNU1-5	Homo sapiens	RNA, U1F1 small nuclear; RNA, U1C2 small nuclear; RNA, U1G2 small nuclear; RNA, U1C1 small nuclear; RNA, U1G3 small nuclear; RNA, U1A3 small nuclear; RNA, U1G1 small nuclear; RNA, U1A small nuclear
7919392	RNU1-8	Homo sapiens	RNA, U1F1 small nuclear; RNA, U1C2 small nuclear; RNA, U1G2 small nuclear; RNA, U1C1 small nuclear; RNA, U1G3 small nuclear; RNA, U1A3 small nuclear; RNA, U1G1 small nuclear; RNA, U1A small nuclear
7919392	RNU1-7	Homo sapiens	RNA, U1F1 small nuclear; RNA, U1C2 small nuclear; RNA, U1G2 small nuclear; RNA, U1C1 small nuclear; RNA, U1G3 small nuclear; RNA, U1A3 small nuclear; RNA, U1G1 small nuclear; RNA, U1A small nuclear
7919392	RNU1-9	Homo sapiens	RNA, U1F1 small nuclear; RNA, U1C2 small nuclear; RNA, U1G2 small nuclear; RNA, U1C1 small nuclear; RNA, U1G3 small nuclear; RNA, U1A3 small nuclear; RNA, U1G1 small nuclear; RNA, U1A small nuclear
7919392	RNU1-3	Homo sapiens	RNA, U1F1 small nuclear; RNA, U1C2 small nuclear; RNA, U1G2 small nuclear; RNA, U1C1 small nuclear; RNA, U1G3 small nuclear; RNA, U1A3 small nuclear; RNA, U1G1 small nuclear; RNA, U1A small nuclear
7919392	RNU1-4	Homo sapiens	RNA, U1F1 small nuclear; RNA, U1C2 small nuclear; RNA, U1G2 small nuclear; RNA, U1C1 small nuclear; RNA, U1G3 small nuclear; RNA, U1A3 small nuclear; RNA, U1G1 small nuclear; RNA, U1A small nuclear
7919392	RNU1-1	Homo sapiens	RNA, U1F1 small nuclear; RNA, U1C2 small nuclear; RNA, U1G2 small nuclear; RNA, U1C1 small nuclear; RNA, U1G3 small nuclear; RNA, U1A3 small nuclear; RNA, U1G1 small nuclear; RNA, U1A small nuclear
7919392	RNU1-2	Homo sapiens	RNA, U1F1 small nuclear; RNA, U1C2 small nuclear; RNA, U1G2 small nuclear; RNA, U1C1 small nuclear; RNA, U1G3 small nuclear; RNA, U1A3 small nuclear; RNA, U1G1 small nuclear; RNA, U1A small nuclear
7893782	ERH	Homo sapiens	enhancer of rudimentary homolog (Drosophila)
7922402	Snord47	Homo sapiens	small nucleolar RNA, C/D box 47
7922400	SNORD81	Homo sapiens	small nucleolar RNA, C/D box 81
8111271	Cdh9	Homo sapiens	cadherin 9, type 2 (T1-cadherin)
7939068	RPS25	Homo sapiens	ribosomal protein S25 pseudogene 8; ribosomal protein S25
7939068	RPS25P8	Homo sapiens	ribosomal protein S25 pseudogene 8; ribosomal protein S25
7966299	RN7SL1	Homo sapiens	RNA, 7SL, cytoplasmic 2; RNA, 7SL, cytoplasmic 1
7966299	RN7SL2	Homo sapiens	RNA, 7SL, cytoplasmic 2; RNA, 7SL, cytoplasmic 1
8014259	Slfn14	Homo sapiens	schlafen family member 14
7916783	RNU4-2	Homo sapiens	RNA, U4 small nuclear 2; RNA, U4 small nuclear 1; RNA, U4 small nuclear 1B
7916783	RNU4-1	Homo sapiens	RNA, U4 small nuclear 2; RNA, U4 small nuclear 1; RNA, U4 small nuclear 1B
7916783	RNU4-1B	Homo sapiens	RNA, U4 small nuclear 2; RNA, U4 small nuclear 1; RNA, U4 small nuclear 1B
7923073	F13B	Homo sapiens	coagulation factor XIII, B polypeptide
7985555	LOC727963	Homo sapiens	similar to elongation factor Tu GTP binding domain containing 1
7954775	RNU6-2	Homo sapiens	RNA, U6 small nuclear 2; RNA, U6 small nuclear 1
7954775	RNU6-1	Homo sapiens	RNA, U6 small nuclear 2; RNA, U6 small nuclear 1
8074593	RIMBP3C	Homo sapiens	RIMS binding protein 3B; RIMS binding protein 3C; RIMS binding protein 3
8074593	RIMBP3B	Homo sapiens	RIMS binding protein 3B; RIMS binding protein 3C; RIMS binding protein 3
8074593	Rimbp3	Homo sapiens	RIMS binding protein 3B; RIMS binding protein 3C; RIMS binding protein 3
7985553	RNU6-2	Homo sapiens	RNA, U6 small nuclear 2; RNA, U6 small nuclear 1
7985553	RNU6-1	Homo sapiens	RNA, U6 small nuclear 2; RNA, U6 small nuclear 1
8152376	CSMD3	Homo sapiens	CUB and Sushi multiple domains 3
8144717	RNU6-2	Homo sapiens	RNA, U6 small nuclear 2; RNA, U6 small nuclear 1
8144717	RNU6-1	Homo sapiens	RNA, U6 small nuclear 2; RNA, U6 small nuclear 1
7892650	RPL35P2	Homo sapiens	ribosomal protein L35; ribosomal protein L35 pseudogene 1; ribosomal protein L35 pseudogene 2
7892650	RPL35P1	Homo sapiens	ribosomal protein L35; ribosomal protein L35 pseudogene 1; ribosomal protein L35 pseudogene 2
7892650	rpl35	Homo sapiens	ribosomal protein L35; ribosomal protein L35 pseudogene 1; ribosomal protein L35 pseudogene 2
7939072	METT5D1	Homo sapiens	methyltransferase 5 domain containing 1
7895098	ZNF259P1	Homo sapiens	zinc finger protein 259, pseudogene
7895096	Jtb	Homo sapiens	jumping translocation breakpoint
8102606	RNU6-2	Homo sapiens	RNA, U6 small nuclear 2; RNA, U6 small nuclear 1
8102606	RNU6-1	Homo sapiens	RNA, U6 small nuclear 2; RNA, U6 small nuclear 1
7892652	HSP90AB1	Homo sapiens	heat shock protein 90kDa alpha (cytosolic), class B member 1
8147848	oxr1	Homo sapiens	oxidation resistance 1
7939979	OR8K1	Homo sapiens	olfactory receptor, family 8, subfamily K, member 1
7893759	EIF4G2	Homo sapiens	eukaryotic translation initiation factor 4 gamma, 2
8056376	SCN3A	Homo sapiens	sodium channel, voltage-gated, type III, alpha subunit
8177426	DAZ3	Homo sapiens	deleted in azoospermia 1; deleted in azoospermia 3; deleted in azoospermia 2; deleted in azoospermia 4
8177426	DAZ4	Homo sapiens	deleted in azoospermia 1; deleted in azoospermia 3; deleted in azoospermia 2; deleted in azoospermia 4
8177426	DAZ1	Homo sapiens	deleted in azoospermia 1; deleted in azoospermia 3; deleted in azoospermia 2; deleted in azoospermia 4
8177426	DAZ2	Homo sapiens	deleted in azoospermia 1; deleted in azoospermia 3; deleted in azoospermia 2; deleted in azoospermia 4
7958031	C12orf48	Homo sapiens	chromosome 12 open reading frame 48
7895082	LOC644063	Homo sapiens	heterogeneous nuclear ribonucleoprotein K; similar to heterogeneous nuclear ribonucleoprotein K
7895082	Hnrnpk	Homo sapiens	heterogeneous nuclear ribonucleoprotein K; similar to heterogeneous nuclear ribonucleoprotein K
8081808	LOC100128175	Homo sapiens	similar to PRO2591
7923086	ASPM	Homo sapiens	asp (abnormal spindle) homolog, microcephaly associated (Drosophila)
8022831	C18orf34	Homo sapiens	chromosome 18 open reading frame 34
8144724	RNY4P7	Homo sapiens	hypothetical LOC100271832; RNA, Ro-associated Y5 pseudogene 10; RNA, Ro-associated Y1; RNA, Ro-associated Y4 pseudogene 7; RNA, Ro-associated Y4 pseudogene 19; RNA, Ro-associated Y3; hypothetical LOC100132111; RNA, Ro-associated Y4
8144724	LOC100271832	Homo sapiens	hypothetical LOC100271832; RNA, Ro-associated Y5 pseudogene 10; RNA, Ro-associated Y1; RNA, Ro-associated Y4 pseudogene 7; RNA, Ro-associated Y4 pseudogene 19; RNA, Ro-associated Y3; hypothetical LOC100132111; RNA, Ro-associated Y4
8144724	RNY5P10	Homo sapiens	hypothetical LOC100271832; RNA, Ro-associated Y5 pseudogene 10; RNA, Ro-associated Y1; RNA, Ro-associated Y4 pseudogene 7; RNA, Ro-associated Y4 pseudogene 19; RNA, Ro-associated Y3; hypothetical LOC100132111; RNA, Ro-associated Y4
8144724	RNY1	Homo sapiens	hypothetical LOC100271832; RNA, Ro-associated Y5 pseudogene 10; RNA, Ro-associated Y1; RNA, Ro-associated Y4 pseudogene 7; RNA, Ro-associated Y4 pseudogene 19; RNA, Ro-associated Y3; hypothetical LOC100132111; RNA, Ro-associated Y4
8144724	LOC100132111	Homo sapiens	hypothetical LOC100271832; RNA, Ro-associated Y5 pseudogene 10; RNA, Ro-associated Y1; RNA, Ro-associated Y4 pseudogene 7; RNA, Ro-associated Y4 pseudogene 19; RNA, Ro-associated Y3; hypothetical LOC100132111; RNA, Ro-associated Y4
8144724	RNY4P19	Homo sapiens	hypothetical LOC100271832; RNA, Ro-associated Y5 pseudogene 10; RNA, Ro-associated Y1; RNA, Ro-associated Y4 pseudogene 7; RNA, Ro-associated Y4 pseudogene 19; RNA, Ro-associated Y3; hypothetical LOC100132111; RNA, Ro-associated Y4
8144724	RNY3	Homo sapiens	hypothetical LOC100271832; RNA, Ro-associated Y5 pseudogene 10; RNA, Ro-associated Y1; RNA, Ro-associated Y4 pseudogene 7; RNA, Ro-associated Y4 pseudogene 19; RNA, Ro-associated Y3; hypothetical LOC100132111; RNA, Ro-associated Y4
8144724	RNY4	Homo sapiens	hypothetical LOC100271832; RNA, Ro-associated Y5 pseudogene 10; RNA, Ro-associated Y1; RNA, Ro-associated Y4 pseudogene 7; RNA, Ro-associated Y4 pseudogene 19; RNA, Ro-associated Y3; hypothetical LOC100132111; RNA, Ro-associated Y4
8023394	STARD6	Homo sapiens	StAR-related lipid transfer (START) domain containing 6
7892661	Atp6v0b	Homo sapiens	ATPase, H+ transporting, lysosomal 21kDa, V0 subunit b
8163255	RNU6-2	Homo sapiens	RNA, U6 small nuclear 2; RNA, U6 small nuclear 1
8163255	RNU6-1	Homo sapiens	RNA, U6 small nuclear 2; RNA, U6 small nuclear 1
8125042	LY6G6C	Homo sapiens	lymphocyte antigen 6 complex, locus G6C
8121140	SNORD3A	Homo sapiens	small nucleolar RNA, C/D box 3B-1; small nucleolar RNA, C/D box 3B-2; small nucleolar RNA, C/D box 3A; small nucleolar RNA, C/D box 3C; small nucleolar RNA, C/D box 3D
8121140	SNORD3D	Homo sapiens	small nucleolar RNA, C/D box 3B-1; small nucleolar RNA, C/D box 3B-2; small nucleolar RNA, C/D box 3A; small nucleolar RNA, C/D box 3C; small nucleolar RNA, C/D box 3D
8121140	SNORD3C	Homo sapiens	small nucleolar RNA, C/D box 3B-1; small nucleolar RNA, C/D box 3B-2; small nucleolar RNA, C/D box 3A; small nucleolar RNA, C/D box 3C; small nucleolar RNA, C/D box 3D
8121140	SNORD3B-1	Homo sapiens	small nucleolar RNA, C/D box 3B-1; small nucleolar RNA, C/D box 3B-2; small nucleolar RNA, C/D box 3A; small nucleolar RNA, C/D box 3C; small nucleolar RNA, C/D box 3D
8121140	SNORD3B-2	Homo sapiens	small nucleolar RNA, C/D box 3B-1; small nucleolar RNA, C/D box 3B-2; small nucleolar RNA, C/D box 3A; small nucleolar RNA, C/D box 3C; small nucleolar RNA, C/D box 3D
7919787	hormad1	Homo sapiens	HORMA domain containing 1
8074192	RNU6-2	Homo sapiens	RNA, U6 small nuclear 2; RNA, U6 small nuclear 1
8074192	RNU6-1	Homo sapiens	RNA, U6 small nuclear 2; RNA, U6 small nuclear 1
8163253	RNU6-2	Homo sapiens	RNA, U6 small nuclear 2; RNA, U6 small nuclear 1
8163253	RNU6-1	Homo sapiens	RNA, U6 small nuclear 2; RNA, U6 small nuclear 1
7895088	nonO	Homo sapiens	non-POU domain containing, octamer-binding
7893763	ilf2	Homo sapiens	interleukin enhancer binding factor 2, 45kDa
7892663	DAD1	Homo sapiens	defender against cell death 1
8121144	MANEA	Homo sapiens	mannosidase, endo-alpha
7939973	OR5T3	Homo sapiens	olfactory receptor, family 5, subfamily T, member 3
8116929	RPL15P18	Homo sapiens	ribosomal protein L15 pseudogene 22; ribosomal protein L15 pseudogene 18; ribosomal protein L15 pseudogene 17; ribosomal protein L15 pseudogene 3; ribosomal protein L15 pseudogene 7; ribosomal protein L15
8116929	RPL15P17	Homo sapiens	ribosomal protein L15 pseudogene 22; ribosomal protein L15 pseudogene 18; ribosomal protein L15 pseudogene 17; ribosomal protein L15 pseudogene 3; ribosomal protein L15 pseudogene 7; ribosomal protein L15
8116929	RPL15P7	Homo sapiens	ribosomal protein L15 pseudogene 22; ribosomal protein L15 pseudogene 18; ribosomal protein L15 pseudogene 17; ribosomal protein L15 pseudogene 3; ribosomal protein L15 pseudogene 7; ribosomal protein L15
8116929	RPL15	Homo sapiens	ribosomal protein L15 pseudogene 22; ribosomal protein L15 pseudogene 18; ribosomal protein L15 pseudogene 17; ribosomal protein L15 pseudogene 3; ribosomal protein L15 pseudogene 7; ribosomal protein L15
8116929	RPL15P3	Homo sapiens	ribosomal protein L15 pseudogene 22; ribosomal protein L15 pseudogene 18; ribosomal protein L15 pseudogene 17; ribosomal protein L15 pseudogene 3; ribosomal protein L15 pseudogene 7; ribosomal protein L15
8116929	RPL15P22	Homo sapiens	ribosomal protein L15 pseudogene 22; ribosomal protein L15 pseudogene 18; ribosomal protein L15 pseudogene 17; ribosomal protein L15 pseudogene 3; ribosomal protein L15 pseudogene 7; ribosomal protein L15
8116520	GNB2L1	Homo sapiens	guanine nucleotide binding protein (G protein), beta polypeptide 2-like 1
8122699	SNORA2A	Homo sapiens	small nucleolar RNA, H/ACA box 2A; small nucleolar RNA, H/ACA box 2B
8122699	SNORA2B	Homo sapiens	small nucleolar RNA, H/ACA box 2A; small nucleolar RNA, H/ACA box 2B
7995783	MT2A	Homo sapiens	metallothionein 2A
8172026	RNU6-2	Homo sapiens	RNA, U6 small nuclear 2; RNA, U6 small nuclear 1
8172026	RNU6-1	Homo sapiens	RNA, U6 small nuclear 2; RNA, U6 small nuclear 1
7929288	EXOC6	Homo sapiens	exocyst complex component 6
8134318	casd1	Homo sapiens	CAS1 domain containing 1
7986598	GOLGA6L1	Homo sapiens	hypothetical LOC645202; Putative golgin subfamily A member 6-like protein 6; hypothetical LOC100132202; golgi autoantigen, golgin subfamily a-like
7986598	LOC645202	Homo sapiens	hypothetical LOC645202; Putative golgin subfamily A member 6-like protein 6; hypothetical LOC100132202; golgi autoantigen, golgin subfamily a-like
7986598	LOC440243	Homo sapiens	hypothetical LOC645202; Putative golgin subfamily A member 6-like protein 6; hypothetical LOC100132202; golgi autoantigen, golgin subfamily a-like
7986598	GOLGA6L6	Homo sapiens	hypothetical LOC645202; Putative golgin subfamily A member 6-like protein 6; hypothetical LOC100132202; golgi autoantigen, golgin subfamily a-like
7986598	LOC100132202	Homo sapiens	hypothetical LOC645202; Putative golgin subfamily A member 6-like protein 6; hypothetical LOC100132202; golgi autoantigen, golgin subfamily a-like
8045919	2014-03-07	Homo sapiens	membrane-associated ring finger (C3HC4) 7
8110112	RNU6-2	Homo sapiens	RNA, U6 small nuclear 2; RNA, U6 small nuclear 1
8110112	RNU6-1	Homo sapiens	RNA, U6 small nuclear 2; RNA, U6 small nuclear 1
7893752	USP22	Homo sapiens	ubiquitin specific peptidase 22
8113113	C5orf36	Homo sapiens	chromosome 5 open reading frame 36
7974029	TTC6	Homo sapiens	tetratricopeptide repeat domain 6
8050232	Cys1	Homo sapiens	cystin 1
8100615	UBA6	Homo sapiens	ubiquitin-like modifier activating enzyme 6
7895866	taf10	Homo sapiens	TAF10 RNA polymerase II, TATA box binding protein (TBP)-associated factor, 30kDa
7892670	sart1	Homo sapiens	squamous cell carcinoma antigen recognized by T cells
7946111	OR52E8	Homo sapiens	olfactory receptor, family 52, subfamily E, member 8
8124901	HLA-C	Homo sapiens	major histocompatibility complex, class I, C; major histocompatibility complex, class I, B
8124901	HLA-B	Homo sapiens	major histocompatibility complex, class I, C; major histocompatibility complex, class I, B
7983393	sorD	Homo sapiens	sorbitol dehydrogenase
8122689	C6orf72	Homo sapiens	chromosome 6 open reading frame 72
7894402	LOC644063	Homo sapiens	heterogeneous nuclear ribonucleoprotein K; similar to heterogeneous nuclear ribonucleoprotein K
7894402	Hnrnpk	Homo sapiens	heterogeneous nuclear ribonucleoprotein K; similar to heterogeneous nuclear ribonucleoprotein K
7893745	HDLBP	Pan troglodytes	high density lipoprotein binding protein
7895873	capns1	Homo sapiens	calpain, small subunit 1
8143605	FAM115B	Homo sapiens	family with sequence similarity 115, member A; family with sequence similarity 115, member B (pseudogene)
8143605	FAM115A	Homo sapiens	family with sequence similarity 115, member A; family with sequence similarity 115, member B (pseudogene)
8113124	ANKRD32	Pan troglodytes	ankyrin repeat domain 32
7895878	rpl9	Homo sapiens	ribosomal protein L9; ribosomal protein L9 pseudogene 25
7895878	RPL9P25	Homo sapiens	ribosomal protein L9; ribosomal protein L9 pseudogene 25
8014603	TBC1D3C	Homo sapiens	TBC1 domain family, member 3E; TBC1 domain family, member 3F; TBC1 domain family, member 3G; TBC1 domain family member 3C-like protein ENSP00000341742; TBC1 domain family, member 3H; TBC1 domain family, member 3; TBC1 domain family, member 3I; TBC1 domain family, member 3B; TBC1 domain family, member 3C
8014603	TBC1D3F	Homo sapiens	TBC1 domain family, member 3E; TBC1 domain family, member 3F; TBC1 domain family, member 3G; TBC1 domain family member 3C-like protein ENSP00000341742; TBC1 domain family, member 3H; TBC1 domain family, member 3; TBC1 domain family, member 3I; TBC1 domain family, member 3B; TBC1 domain family, member 3C
8014603	TBC1D3G	Homo sapiens	TBC1 domain family, member 3E; TBC1 domain family, member 3F; TBC1 domain family, member 3G; TBC1 domain family member 3C-like protein ENSP00000341742; TBC1 domain family, member 3H; TBC1 domain family, member 3; TBC1 domain family, member 3I; TBC1 domain family, member 3B; TBC1 domain family, member 3C
8014603	TBC1D3H	Homo sapiens	TBC1 domain family, member 3E; TBC1 domain family, member 3F; TBC1 domain family, member 3G; TBC1 domain family member 3C-like protein ENSP00000341742; TBC1 domain family, member 3H; TBC1 domain family, member 3; TBC1 domain family, member 3I; TBC1 domain family, member 3B; TBC1 domain family, member 3C
8014603	LOC653380	Homo sapiens	TBC1 domain family, member 3E; TBC1 domain family, member 3F; TBC1 domain family, member 3G; TBC1 domain family member 3C-like protein ENSP00000341742; TBC1 domain family, member 3H; TBC1 domain family, member 3; TBC1 domain family, member 3I; TBC1 domain family, member 3B; TBC1 domain family, member 3C
8014603	TBC1D3	Homo sapiens	TBC1 domain family, member 3E; TBC1 domain family, member 3F; TBC1 domain family, member 3G; TBC1 domain family member 3C-like protein ENSP00000341742; TBC1 domain family, member 3H; TBC1 domain family, member 3; TBC1 domain family, member 3I; TBC1 domain family, member 3B; TBC1 domain family, member 3C
8014603	TBC1D3B	Homo sapiens	TBC1 domain family, member 3E; TBC1 domain family, member 3F; TBC1 domain family, member 3G; TBC1 domain family member 3C-like protein ENSP00000341742; TBC1 domain family, member 3H; TBC1 domain family, member 3; TBC1 domain family, member 3I; TBC1 domain family, member 3B; TBC1 domain family, member 3C
8050240	ODC1	Homo sapiens	ornithine decarboxylase 1
7892682	rpl24	Homo sapiens	ribosomal protein L24; ribosomal protein L24 pseudogene 6
7892682	RPL24P6	Homo sapiens	ribosomal protein L24; ribosomal protein L24 pseudogene 6
8121161	KIAA0776	Homo sapiens	KIAA0776
7898875	rpl11	Homo sapiens	ribosomal protein L11
8147891	PKHD1L1	Homo sapiens	polycystic kidney and hepatic disease 1 (autosomal recessive)-like 1
7923034	B3galt2	Homo sapiens	UDP-Gal:betaGlcNAc beta 1,3-galactosyltransferase, polypeptide 2
7951429	KBTBD3	Homo sapiens	kelch repeat and BTB (POZ) domain containing 3
8102655	bbs7	Homo sapiens	Bardet-Biedl syndrome 7
7943319	Cntn5	Homo sapiens	contactin 5
7919349	RNU1-5	Homo sapiens	RNA, U1F1 small nuclear; RNA, U1C2 small nuclear; RNA, U1G2 small nuclear; RNA, U1C1 small nuclear; RNA, U1G3 small nuclear; RNA, U1A3 small nuclear; RNA, U1G1 small nuclear; RNA, U1A small nuclear
7919349	RNU1-8	Homo sapiens	RNA, U1F1 small nuclear; RNA, U1C2 small nuclear; RNA, U1G2 small nuclear; RNA, U1C1 small nuclear; RNA, U1G3 small nuclear; RNA, U1A3 small nuclear; RNA, U1G1 small nuclear; RNA, U1A small nuclear
7919349	RNU1-7	Homo sapiens	RNA, U1F1 small nuclear; RNA, U1C2 small nuclear; RNA, U1G2 small nuclear; RNA, U1C1 small nuclear; RNA, U1G3 small nuclear; RNA, U1A3 small nuclear; RNA, U1G1 small nuclear; RNA, U1A small nuclear
7919349	RNU1-9	Homo sapiens	RNA, U1F1 small nuclear; RNA, U1C2 small nuclear; RNA, U1G2 small nuclear; RNA, U1C1 small nuclear; RNA, U1G3 small nuclear; RNA, U1A3 small nuclear; RNA, U1G1 small nuclear; RNA, U1A small nuclear
7919349	RNU1-3	Homo sapiens	RNA, U1F1 small nuclear; RNA, U1C2 small nuclear; RNA, U1G2 small nuclear; RNA, U1C1 small nuclear; RNA, U1G3 small nuclear; RNA, U1A3 small nuclear; RNA, U1G1 small nuclear; RNA, U1A small nuclear
7919349	RNU1-4	Homo sapiens	RNA, U1F1 small nuclear; RNA, U1C2 small nuclear; RNA, U1G2 small nuclear; RNA, U1C1 small nuclear; RNA, U1G3 small nuclear; RNA, U1A3 small nuclear; RNA, U1G1 small nuclear; RNA, U1A small nuclear
7919349	RNU1-1	Homo sapiens	RNA, U1F1 small nuclear; RNA, U1C2 small nuclear; RNA, U1G2 small nuclear; RNA, U1C1 small nuclear; RNA, U1G3 small nuclear; RNA, U1A3 small nuclear; RNA, U1G1 small nuclear; RNA, U1A small nuclear
7919349	RNU1-2	Homo sapiens	RNA, U1F1 small nuclear; RNA, U1C2 small nuclear; RNA, U1G2 small nuclear; RNA, U1C1 small nuclear; RNA, U1G3 small nuclear; RNA, U1A3 small nuclear; RNA, U1G1 small nuclear; RNA, U1A small nuclear
8135847	RNU6-2	Homo sapiens	RNA, U6 small nuclear 2; RNA, U6 small nuclear 1
8135847	RNU6-1	Homo sapiens	RNA, U6 small nuclear 2; RNA, U6 small nuclear 1
7893734	HMGB3	Homo sapiens	similar to high mobility group box 3; high-mobility group box 3
7893734	LOC729595	Homo sapiens	similar to high mobility group box 3; high-mobility group box 3
7893734	LOC646993	Homo sapiens	similar to high mobility group box 3; high-mobility group box 3
7893734	LOC729952	Homo sapiens	similar to high mobility group box 3; high-mobility group box 3
7893733	Tmed2	Homo sapiens	transmembrane emp24 domain trafficking protein 2
7895881	Arf1	Homo sapiens	ADP-ribosylation factor 1
7965721	RN5S10	Homo sapiens	RNA, 5S ribosomal 9; RNA, 5S ribosomal 13; RNA, 5S ribosomal 12; RNA, 5S ribosomal 11; RNA, 5S ribosomal 10; RNA, 5S ribosomal 17; RNA, 5S ribosomal 16; RNA, 5S ribosomal 15; RNA, 5S ribosomal 14; RNA, 5S ribosomal 1; RNA, 5S ribosomal 2; RNA, 5S ribosomal 3; RNA, 5S ribosomal 4; RNA, 5S ribosomal 5; RNA, 5S ribosomal 6; RNA, 5S ribosomal 7; RNA, 5S ribosomal 8
7965721	RN5S11	Homo sapiens	RNA, 5S ribosomal 9; RNA, 5S ribosomal 13; RNA, 5S ribosomal 12; RNA, 5S ribosomal 11; RNA, 5S ribosomal 10; RNA, 5S ribosomal 17; RNA, 5S ribosomal 16; RNA, 5S ribosomal 15; RNA, 5S ribosomal 14; RNA, 5S ribosomal 1; RNA, 5S ribosomal 2; RNA, 5S ribosomal 3; RNA, 5S ribosomal 4; RNA, 5S ribosomal 5; RNA, 5S ribosomal 6; RNA, 5S ribosomal 7; RNA, 5S ribosomal 8
7965721	RN5S12	Homo sapiens	RNA, 5S ribosomal 9; RNA, 5S ribosomal 13; RNA, 5S ribosomal 12; RNA, 5S ribosomal 11; RNA, 5S ribosomal 10; RNA, 5S ribosomal 17; RNA, 5S ribosomal 16; RNA, 5S ribosomal 15; RNA, 5S ribosomal 14; RNA, 5S ribosomal 1; RNA, 5S ribosomal 2; RNA, 5S ribosomal 3; RNA, 5S ribosomal 4; RNA, 5S ribosomal 5; RNA, 5S ribosomal 6; RNA, 5S ribosomal 7; RNA, 5S ribosomal 8
7965721	RN5S13	Homo sapiens	RNA, 5S ribosomal 9; RNA, 5S ribosomal 13; RNA, 5S ribosomal 12; RNA, 5S ribosomal 11; RNA, 5S ribosomal 10; RNA, 5S ribosomal 17; RNA, 5S ribosomal 16; RNA, 5S ribosomal 15; RNA, 5S ribosomal 14; RNA, 5S ribosomal 1; RNA, 5S ribosomal 2; RNA, 5S ribosomal 3; RNA, 5S ribosomal 4; RNA, 5S ribosomal 5; RNA, 5S ribosomal 6; RNA, 5S ribosomal 7; RNA, 5S ribosomal 8
7965721	RN5S14	Homo sapiens	RNA, 5S ribosomal 9; RNA, 5S ribosomal 13; RNA, 5S ribosomal 12; RNA, 5S ribosomal 11; RNA, 5S ribosomal 10; RNA, 5S ribosomal 17; RNA, 5S ribosomal 16; RNA, 5S ribosomal 15; RNA, 5S ribosomal 14; RNA, 5S ribosomal 1; RNA, 5S ribosomal 2; RNA, 5S ribosomal 3; RNA, 5S ribosomal 4; RNA, 5S ribosomal 5; RNA, 5S ribosomal 6; RNA, 5S ribosomal 7; RNA, 5S ribosomal 8
7965721	RN5S15	Homo sapiens	RNA, 5S ribosomal 9; RNA, 5S ribosomal 13; RNA, 5S ribosomal 12; RNA, 5S ribosomal 11; RNA, 5S ribosomal 10; RNA, 5S ribosomal 17; RNA, 5S ribosomal 16; RNA, 5S ribosomal 15; RNA, 5S ribosomal 14; RNA, 5S ribosomal 1; RNA, 5S ribosomal 2; RNA, 5S ribosomal 3; RNA, 5S ribosomal 4; RNA, 5S ribosomal 5; RNA, 5S ribosomal 6; RNA, 5S ribosomal 7; RNA, 5S ribosomal 8
7965721	RN5S16	Homo sapiens	RNA, 5S ribosomal 9; RNA, 5S ribosomal 13; RNA, 5S ribosomal 12; RNA, 5S ribosomal 11; RNA, 5S ribosomal 10; RNA, 5S ribosomal 17; RNA, 5S ribosomal 16; RNA, 5S ribosomal 15; RNA, 5S ribosomal 14; RNA, 5S ribosomal 1; RNA, 5S ribosomal 2; RNA, 5S ribosomal 3; RNA, 5S ribosomal 4; RNA, 5S ribosomal 5; RNA, 5S ribosomal 6; RNA, 5S ribosomal 7; RNA, 5S ribosomal 8
7965721	RN5S6	Homo sapiens	RNA, 5S ribosomal 9; RNA, 5S ribosomal 13; RNA, 5S ribosomal 12; RNA, 5S ribosomal 11; RNA, 5S ribosomal 10; RNA, 5S ribosomal 17; RNA, 5S ribosomal 16; RNA, 5S ribosomal 15; RNA, 5S ribosomal 14; RNA, 5S ribosomal 1; RNA, 5S ribosomal 2; RNA, 5S ribosomal 3; RNA, 5S ribosomal 4; RNA, 5S ribosomal 5; RNA, 5S ribosomal 6; RNA, 5S ribosomal 7; RNA, 5S ribosomal 8
7965721	RN5S7	Homo sapiens	RNA, 5S ribosomal 9; RNA, 5S ribosomal 13; RNA, 5S ribosomal 12; RNA, 5S ribosomal 11; RNA, 5S ribosomal 10; RNA, 5S ribosomal 17; RNA, 5S ribosomal 16; RNA, 5S ribosomal 15; RNA, 5S ribosomal 14; RNA, 5S ribosomal 1; RNA, 5S ribosomal 2; RNA, 5S ribosomal 3; RNA, 5S ribosomal 4; RNA, 5S ribosomal 5; RNA, 5S ribosomal 6; RNA, 5S ribosomal 7; RNA, 5S ribosomal 8
7965721	RN5S8	Homo sapiens	RNA, 5S ribosomal 9; RNA, 5S ribosomal 13; RNA, 5S ribosomal 12; RNA, 5S ribosomal 11; RNA, 5S ribosomal 10; RNA, 5S ribosomal 17; RNA, 5S ribosomal 16; RNA, 5S ribosomal 15; RNA, 5S ribosomal 14; RNA, 5S ribosomal 1; RNA, 5S ribosomal 2; RNA, 5S ribosomal 3; RNA, 5S ribosomal 4; RNA, 5S ribosomal 5; RNA, 5S ribosomal 6; RNA, 5S ribosomal 7; RNA, 5S ribosomal 8
7965721	RN5S9	Homo sapiens	RNA, 5S ribosomal 9; RNA, 5S ribosomal 13; RNA, 5S ribosomal 12; RNA, 5S ribosomal 11; RNA, 5S ribosomal 10; RNA, 5S ribosomal 17; RNA, 5S ribosomal 16; RNA, 5S ribosomal 15; RNA, 5S ribosomal 14; RNA, 5S ribosomal 1; RNA, 5S ribosomal 2; RNA, 5S ribosomal 3; RNA, 5S ribosomal 4; RNA, 5S ribosomal 5; RNA, 5S ribosomal 6; RNA, 5S ribosomal 7; RNA, 5S ribosomal 8
7965721	RN5S2	Homo sapiens	RNA, 5S ribosomal 9; RNA, 5S ribosomal 13; RNA, 5S ribosomal 12; RNA, 5S ribosomal 11; RNA, 5S ribosomal 10; RNA, 5S ribosomal 17; RNA, 5S ribosomal 16; RNA, 5S ribosomal 15; RNA, 5S ribosomal 14; RNA, 5S ribosomal 1; RNA, 5S ribosomal 2; RNA, 5S ribosomal 3; RNA, 5S ribosomal 4; RNA, 5S ribosomal 5; RNA, 5S ribosomal 6; RNA, 5S ribosomal 7; RNA, 5S ribosomal 8
7965721	RN5S3	Homo sapiens	RNA, 5S ribosomal 9; RNA, 5S ribosomal 13; RNA, 5S ribosomal 12; RNA, 5S ribosomal 11; RNA, 5S ribosomal 10; RNA, 5S ribosomal 17; RNA, 5S ribosomal 16; RNA, 5S ribosomal 15; RNA, 5S ribosomal 14; RNA, 5S ribosomal 1; RNA, 5S ribosomal 2; RNA, 5S ribosomal 3; RNA, 5S ribosomal 4; RNA, 5S ribosomal 5; RNA, 5S ribosomal 6; RNA, 5S ribosomal 7; RNA, 5S ribosomal 8
7965721	RN5S4	Homo sapiens	RNA, 5S ribosomal 9; RNA, 5S ribosomal 13; RNA, 5S ribosomal 12; RNA, 5S ribosomal 11; RNA, 5S ribosomal 10; RNA, 5S ribosomal 17; RNA, 5S ribosomal 16; RNA, 5S ribosomal 15; RNA, 5S ribosomal 14; RNA, 5S ribosomal 1; RNA, 5S ribosomal 2; RNA, 5S ribosomal 3; RNA, 5S ribosomal 4; RNA, 5S ribosomal 5; RNA, 5S ribosomal 6; RNA, 5S ribosomal 7; RNA, 5S ribosomal 8
7965721	RN5S5	Homo sapiens	RNA, 5S ribosomal 9; RNA, 5S ribosomal 13; RNA, 5S ribosomal 12; RNA, 5S ribosomal 11; RNA, 5S ribosomal 10; RNA, 5S ribosomal 17; RNA, 5S ribosomal 16; RNA, 5S ribosomal 15; RNA, 5S ribosomal 14; RNA, 5S ribosomal 1; RNA, 5S ribosomal 2; RNA, 5S ribosomal 3; RNA, 5S ribosomal 4; RNA, 5S ribosomal 5; RNA, 5S ribosomal 6; RNA, 5S ribosomal 7; RNA, 5S ribosomal 8
7965721	RN5S1	Homo sapiens	RNA, 5S ribosomal 9; RNA, 5S ribosomal 13; RNA, 5S ribosomal 12; RNA, 5S ribosomal 11; RNA, 5S ribosomal 10; RNA, 5S ribosomal 17; RNA, 5S ribosomal 16; RNA, 5S ribosomal 15; RNA, 5S ribosomal 14; RNA, 5S ribosomal 1; RNA, 5S ribosomal 2; RNA, 5S ribosomal 3; RNA, 5S ribosomal 4; RNA, 5S ribosomal 5; RNA, 5S ribosomal 6; RNA, 5S ribosomal 7; RNA, 5S ribosomal 8
7965721	RN5S17	Homo sapiens	RNA, 5S ribosomal 9; RNA, 5S ribosomal 13; RNA, 5S ribosomal 12; RNA, 5S ribosomal 11; RNA, 5S ribosomal 10; RNA, 5S ribosomal 17; RNA, 5S ribosomal 16; RNA, 5S ribosomal 15; RNA, 5S ribosomal 14; RNA, 5S ribosomal 1; RNA, 5S ribosomal 2; RNA, 5S ribosomal 3; RNA, 5S ribosomal 4; RNA, 5S ribosomal 5; RNA, 5S ribosomal 6; RNA, 5S ribosomal 7; RNA, 5S ribosomal 8
7895886	EIF4G2	Homo sapiens	eukaryotic translation initiation factor 4 gamma, 2
8097036	RNU6-2	Homo sapiens	RNA, U6 small nuclear 2; RNA, U6 small nuclear 1
8097036	RNU6-1	Homo sapiens	RNA, U6 small nuclear 2; RNA, U6 small nuclear 1
8116952	RNU1-5	Homo sapiens	RNA, U1F1 small nuclear; RNA, U1C2 small nuclear; RNA, U1G2 small nuclear; RNA, U1C1 small nuclear; RNA, U1G3 small nuclear; RNA, U1A3 small nuclear; RNA, U1G1 small nuclear; RNA, U1A small nuclear
8116952	RNU1-8	Homo sapiens	RNA, U1F1 small nuclear; RNA, U1C2 small nuclear; RNA, U1G2 small nuclear; RNA, U1C1 small nuclear; RNA, U1G3 small nuclear; RNA, U1A3 small nuclear; RNA, U1G1 small nuclear; RNA, U1A small nuclear
8116952	RNU1-7	Homo sapiens	RNA, U1F1 small nuclear; RNA, U1C2 small nuclear; RNA, U1G2 small nuclear; RNA, U1C1 small nuclear; RNA, U1G3 small nuclear; RNA, U1A3 small nuclear; RNA, U1G1 small nuclear; RNA, U1A small nuclear
8116952	RNU1-9	Homo sapiens	RNA, U1F1 small nuclear; RNA, U1C2 small nuclear; RNA, U1G2 small nuclear; RNA, U1C1 small nuclear; RNA, U1G3 small nuclear; RNA, U1A3 small nuclear; RNA, U1G1 small nuclear; RNA, U1A small nuclear
8116952	RNU1-3	Homo sapiens	RNA, U1F1 small nuclear; RNA, U1C2 small nuclear; RNA, U1G2 small nuclear; RNA, U1C1 small nuclear; RNA, U1G3 small nuclear; RNA, U1A3 small nuclear; RNA, U1G1 small nuclear; RNA, U1A small nuclear
8116952	RNU1-4	Homo sapiens	RNA, U1F1 small nuclear; RNA, U1C2 small nuclear; RNA, U1G2 small nuclear; RNA, U1C1 small nuclear; RNA, U1G3 small nuclear; RNA, U1A3 small nuclear; RNA, U1G1 small nuclear; RNA, U1A small nuclear
8116952	RNU1-1	Homo sapiens	RNA, U1F1 small nuclear; RNA, U1C2 small nuclear; RNA, U1G2 small nuclear; RNA, U1C1 small nuclear; RNA, U1G3 small nuclear; RNA, U1A3 small nuclear; RNA, U1G1 small nuclear; RNA, U1A small nuclear
8116952	RNU1-2	Homo sapiens	RNA, U1F1 small nuclear; RNA, U1C2 small nuclear; RNA, U1G2 small nuclear; RNA, U1C1 small nuclear; RNA, U1G3 small nuclear; RNA, U1A3 small nuclear; RNA, U1G1 small nuclear; RNA, U1A small nuclear
8177460	C20orf69	Homo sapiens	chromosome 20 open reading frame 69; similar to hCG1984118
8177460	LOC729227	Homo sapiens	chromosome 20 open reading frame 69; similar to hCG1984118
7923043	KCNT2	Homo sapiens	potassium channel, subfamily T, member 2
8022870	RNY4P7	Homo sapiens	hypothetical LOC100271832; RNA, Ro-associated Y5 pseudogene 10; RNA, Ro-associated Y1; RNA, Ro-associated Y4 pseudogene 7; RNA, Ro-associated Y4 pseudogene 19; RNA, Ro-associated Y3; hypothetical LOC100132111; RNA, Ro-associated Y4
8022870	LOC100271832	Homo sapiens	hypothetical LOC100271832; RNA, Ro-associated Y5 pseudogene 10; RNA, Ro-associated Y1; RNA, Ro-associated Y4 pseudogene 7; RNA, Ro-associated Y4 pseudogene 19; RNA, Ro-associated Y3; hypothetical LOC100132111; RNA, Ro-associated Y4
8022870	RNY5P10	Homo sapiens	hypothetical LOC100271832; RNA, Ro-associated Y5 pseudogene 10; RNA, Ro-associated Y1; RNA, Ro-associated Y4 pseudogene 7; RNA, Ro-associated Y4 pseudogene 19; RNA, Ro-associated Y3; hypothetical LOC100132111; RNA, Ro-associated Y4
8022870	RNY1	Homo sapiens	hypothetical LOC100271832; RNA, Ro-associated Y5 pseudogene 10; RNA, Ro-associated Y1; RNA, Ro-associated Y4 pseudogene 7; RNA, Ro-associated Y4 pseudogene 19; RNA, Ro-associated Y3; hypothetical LOC100132111; RNA, Ro-associated Y4
8022870	LOC100132111	Homo sapiens	hypothetical LOC100271832; RNA, Ro-associated Y5 pseudogene 10; RNA, Ro-associated Y1; RNA, Ro-associated Y4 pseudogene 7; RNA, Ro-associated Y4 pseudogene 19; RNA, Ro-associated Y3; hypothetical LOC100132111; RNA, Ro-associated Y4
8022870	RNY4P19	Homo sapiens	hypothetical LOC100271832; RNA, Ro-associated Y5 pseudogene 10; RNA, Ro-associated Y1; RNA, Ro-associated Y4 pseudogene 7; RNA, Ro-associated Y4 pseudogene 19; RNA, Ro-associated Y3; hypothetical LOC100132111; RNA, Ro-associated Y4
8022870	RNY3	Homo sapiens	hypothetical LOC100271832; RNA, Ro-associated Y5 pseudogene 10; RNA, Ro-associated Y1; RNA, Ro-associated Y4 pseudogene 7; RNA, Ro-associated Y4 pseudogene 19; RNA, Ro-associated Y3; hypothetical LOC100132111; RNA, Ro-associated Y4
8022870	RNY4	Homo sapiens	hypothetical LOC100271832; RNA, Ro-associated Y5 pseudogene 10; RNA, Ro-associated Y1; RNA, Ro-associated Y4 pseudogene 7; RNA, Ro-associated Y4 pseudogene 19; RNA, Ro-associated Y3; hypothetical LOC100132111; RNA, Ro-associated Y4
7893715	LOC644101	Homo sapiens	similar to chromobox homolog 3; chromobox homolog 3 (HP1 gamma homolog, Drosophila)
7893715	CBX3	Homo sapiens	similar to chromobox homolog 3; chromobox homolog 3 (HP1 gamma homolog, Drosophila)
8134316	RNU6-2	Homo sapiens	RNA, U6 small nuclear 2; RNA, U6 small nuclear 1
8134316	RNU6-1	Homo sapiens	RNA, U6 small nuclear 2; RNA, U6 small nuclear 1
8113103	C5orf36	Homo sapiens	chromosome 5 open reading frame 36
7893721	PARK7	Homo sapiens	Parkinson disease (autosomal recessive, early onset) 7
8178903	Rxrb	Homo sapiens	retinoid X receptor, beta
8045946	PSMD14	Homo sapiens	proteasome (prosome, macropain) 26S subunit, non-ATPase, 14
8128472	ASCC3	Homo sapiens	activating signal cointegrator 1 complex subunit 3
8155596	RN5S10	Homo sapiens	RNA, 5S ribosomal 9; RNA, 5S ribosomal 13; RNA, 5S ribosomal 12; RNA, 5S ribosomal 11; RNA, 5S ribosomal 10; RNA, 5S ribosomal 17; RNA, 5S ribosomal 16; RNA, 5S ribosomal 15; RNA, 5S ribosomal 14; RNA, 5S ribosomal 1; RNA, 5S ribosomal 2; RNA, 5S ribosomal 3; RNA, 5S ribosomal 4; RNA, 5S ribosomal 5; RNA, 5S ribosomal 6; RNA, 5S ribosomal 7; RNA, 5S ribosomal 8
8155596	RN5S11	Homo sapiens	RNA, 5S ribosomal 9; RNA, 5S ribosomal 13; RNA, 5S ribosomal 12; RNA, 5S ribosomal 11; RNA, 5S ribosomal 10; RNA, 5S ribosomal 17; RNA, 5S ribosomal 16; RNA, 5S ribosomal 15; RNA, 5S ribosomal 14; RNA, 5S ribosomal 1; RNA, 5S ribosomal 2; RNA, 5S ribosomal 3; RNA, 5S ribosomal 4; RNA, 5S ribosomal 5; RNA, 5S ribosomal 6; RNA, 5S ribosomal 7; RNA, 5S ribosomal 8
8155596	RN5S12	Homo sapiens	RNA, 5S ribosomal 9; RNA, 5S ribosomal 13; RNA, 5S ribosomal 12; RNA, 5S ribosomal 11; RNA, 5S ribosomal 10; RNA, 5S ribosomal 17; RNA, 5S ribosomal 16; RNA, 5S ribosomal 15; RNA, 5S ribosomal 14; RNA, 5S ribosomal 1; RNA, 5S ribosomal 2; RNA, 5S ribosomal 3; RNA, 5S ribosomal 4; RNA, 5S ribosomal 5; RNA, 5S ribosomal 6; RNA, 5S ribosomal 7; RNA, 5S ribosomal 8
8155596	RN5S13	Homo sapiens	RNA, 5S ribosomal 9; RNA, 5S ribosomal 13; RNA, 5S ribosomal 12; RNA, 5S ribosomal 11; RNA, 5S ribosomal 10; RNA, 5S ribosomal 17; RNA, 5S ribosomal 16; RNA, 5S ribosomal 15; RNA, 5S ribosomal 14; RNA, 5S ribosomal 1; RNA, 5S ribosomal 2; RNA, 5S ribosomal 3; RNA, 5S ribosomal 4; RNA, 5S ribosomal 5; RNA, 5S ribosomal 6; RNA, 5S ribosomal 7; RNA, 5S ribosomal 8
8155596	RN5S14	Homo sapiens	RNA, 5S ribosomal 9; RNA, 5S ribosomal 13; RNA, 5S ribosomal 12; RNA, 5S ribosomal 11; RNA, 5S ribosomal 10; RNA, 5S ribosomal 17; RNA, 5S ribosomal 16; RNA, 5S ribosomal 15; RNA, 5S ribosomal 14; RNA, 5S ribosomal 1; RNA, 5S ribosomal 2; RNA, 5S ribosomal 3; RNA, 5S ribosomal 4; RNA, 5S ribosomal 5; RNA, 5S ribosomal 6; RNA, 5S ribosomal 7; RNA, 5S ribosomal 8
8155596	RN5S15	Homo sapiens	RNA, 5S ribosomal 9; RNA, 5S ribosomal 13; RNA, 5S ribosomal 12; RNA, 5S ribosomal 11; RNA, 5S ribosomal 10; RNA, 5S ribosomal 17; RNA, 5S ribosomal 16; RNA, 5S ribosomal 15; RNA, 5S ribosomal 14; RNA, 5S ribosomal 1; RNA, 5S ribosomal 2; RNA, 5S ribosomal 3; RNA, 5S ribosomal 4; RNA, 5S ribosomal 5; RNA, 5S ribosomal 6; RNA, 5S ribosomal 7; RNA, 5S ribosomal 8
8155596	RN5S16	Homo sapiens	RNA, 5S ribosomal 9; RNA, 5S ribosomal 13; RNA, 5S ribosomal 12; RNA, 5S ribosomal 11; RNA, 5S ribosomal 10; RNA, 5S ribosomal 17; RNA, 5S ribosomal 16; RNA, 5S ribosomal 15; RNA, 5S ribosomal 14; RNA, 5S ribosomal 1; RNA, 5S ribosomal 2; RNA, 5S ribosomal 3; RNA, 5S ribosomal 4; RNA, 5S ribosomal 5; RNA, 5S ribosomal 6; RNA, 5S ribosomal 7; RNA, 5S ribosomal 8
8155596	RN5S6	Homo sapiens	RNA, 5S ribosomal 9; RNA, 5S ribosomal 13; RNA, 5S ribosomal 12; RNA, 5S ribosomal 11; RNA, 5S ribosomal 10; RNA, 5S ribosomal 17; RNA, 5S ribosomal 16; RNA, 5S ribosomal 15; RNA, 5S ribosomal 14; RNA, 5S ribosomal 1; RNA, 5S ribosomal 2; RNA, 5S ribosomal 3; RNA, 5S ribosomal 4; RNA, 5S ribosomal 5; RNA, 5S ribosomal 6; RNA, 5S ribosomal 7; RNA, 5S ribosomal 8
8155596	RN5S7	Homo sapiens	RNA, 5S ribosomal 9; RNA, 5S ribosomal 13; RNA, 5S ribosomal 12; RNA, 5S ribosomal 11; RNA, 5S ribosomal 10; RNA, 5S ribosomal 17; RNA, 5S ribosomal 16; RNA, 5S ribosomal 15; RNA, 5S ribosomal 14; RNA, 5S ribosomal 1; RNA, 5S ribosomal 2; RNA, 5S ribosomal 3; RNA, 5S ribosomal 4; RNA, 5S ribosomal 5; RNA, 5S ribosomal 6; RNA, 5S ribosomal 7; RNA, 5S ribosomal 8
8155596	RN5S8	Homo sapiens	RNA, 5S ribosomal 9; RNA, 5S ribosomal 13; RNA, 5S ribosomal 12; RNA, 5S ribosomal 11; RNA, 5S ribosomal 10; RNA, 5S ribosomal 17; RNA, 5S ribosomal 16; RNA, 5S ribosomal 15; RNA, 5S ribosomal 14; RNA, 5S ribosomal 1; RNA, 5S ribosomal 2; RNA, 5S ribosomal 3; RNA, 5S ribosomal 4; RNA, 5S ribosomal 5; RNA, 5S ribosomal 6; RNA, 5S ribosomal 7; RNA, 5S ribosomal 8
8155596	RN5S9	Homo sapiens	RNA, 5S ribosomal 9; RNA, 5S ribosomal 13; RNA, 5S ribosomal 12; RNA, 5S ribosomal 11; RNA, 5S ribosomal 10; RNA, 5S ribosomal 17; RNA, 5S ribosomal 16; RNA, 5S ribosomal 15; RNA, 5S ribosomal 14; RNA, 5S ribosomal 1; RNA, 5S ribosomal 2; RNA, 5S ribosomal 3; RNA, 5S ribosomal 4; RNA, 5S ribosomal 5; RNA, 5S ribosomal 6; RNA, 5S ribosomal 7; RNA, 5S ribosomal 8
8155596	RN5S2	Homo sapiens	RNA, 5S ribosomal 9; RNA, 5S ribosomal 13; RNA, 5S ribosomal 12; RNA, 5S ribosomal 11; RNA, 5S ribosomal 10; RNA, 5S ribosomal 17; RNA, 5S ribosomal 16; RNA, 5S ribosomal 15; RNA, 5S ribosomal 14; RNA, 5S ribosomal 1; RNA, 5S ribosomal 2; RNA, 5S ribosomal 3; RNA, 5S ribosomal 4; RNA, 5S ribosomal 5; RNA, 5S ribosomal 6; RNA, 5S ribosomal 7; RNA, 5S ribosomal 8
8155596	RN5S3	Homo sapiens	RNA, 5S ribosomal 9; RNA, 5S ribosomal 13; RNA, 5S ribosomal 12; RNA, 5S ribosomal 11; RNA, 5S ribosomal 10; RNA, 5S ribosomal 17; RNA, 5S ribosomal 16; RNA, 5S ribosomal 15; RNA, 5S ribosomal 14; RNA, 5S ribosomal 1; RNA, 5S ribosomal 2; RNA, 5S ribosomal 3; RNA, 5S ribosomal 4; RNA, 5S ribosomal 5; RNA, 5S ribosomal 6; RNA, 5S ribosomal 7; RNA, 5S ribosomal 8
8155596	RN5S4	Homo sapiens	RNA, 5S ribosomal 9; RNA, 5S ribosomal 13; RNA, 5S ribosomal 12; RNA, 5S ribosomal 11; RNA, 5S ribosomal 10; RNA, 5S ribosomal 17; RNA, 5S ribosomal 16; RNA, 5S ribosomal 15; RNA, 5S ribosomal 14; RNA, 5S ribosomal 1; RNA, 5S ribosomal 2; RNA, 5S ribosomal 3; RNA, 5S ribosomal 4; RNA, 5S ribosomal 5; RNA, 5S ribosomal 6; RNA, 5S ribosomal 7; RNA, 5S ribosomal 8
8155596	RN5S5	Homo sapiens	RNA, 5S ribosomal 9; RNA, 5S ribosomal 13; RNA, 5S ribosomal 12; RNA, 5S ribosomal 11; RNA, 5S ribosomal 10; RNA, 5S ribosomal 17; RNA, 5S ribosomal 16; RNA, 5S ribosomal 15; RNA, 5S ribosomal 14; RNA, 5S ribosomal 1; RNA, 5S ribosomal 2; RNA, 5S ribosomal 3; RNA, 5S ribosomal 4; RNA, 5S ribosomal 5; RNA, 5S ribosomal 6; RNA, 5S ribosomal 7; RNA, 5S ribosomal 8
8155596	RN5S1	Homo sapiens	RNA, 5S ribosomal 9; RNA, 5S ribosomal 13; RNA, 5S ribosomal 12; RNA, 5S ribosomal 11; RNA, 5S ribosomal 10; RNA, 5S ribosomal 17; RNA, 5S ribosomal 16; RNA, 5S ribosomal 15; RNA, 5S ribosomal 14; RNA, 5S ribosomal 1; RNA, 5S ribosomal 2; RNA, 5S ribosomal 3; RNA, 5S ribosomal 4; RNA, 5S ribosomal 5; RNA, 5S ribosomal 6; RNA, 5S ribosomal 7; RNA, 5S ribosomal 8
8155596	RN5S17	Homo sapiens	RNA, 5S ribosomal 9; RNA, 5S ribosomal 13; RNA, 5S ribosomal 12; RNA, 5S ribosomal 11; RNA, 5S ribosomal 10; RNA, 5S ribosomal 17; RNA, 5S ribosomal 16; RNA, 5S ribosomal 15; RNA, 5S ribosomal 14; RNA, 5S ribosomal 1; RNA, 5S ribosomal 2; RNA, 5S ribosomal 3; RNA, 5S ribosomal 4; RNA, 5S ribosomal 5; RNA, 5S ribosomal 6; RNA, 5S ribosomal 7; RNA, 5S ribosomal 8
8097098	usp53	Homo sapiens	ubiquitin specific peptidase 53
8166349	RNY4P7	Homo sapiens	hypothetical LOC100271832; RNA, Ro-associated Y5 pseudogene 10; RNA, Ro-associated Y1; RNA, Ro-associated Y4 pseudogene 7; RNA, Ro-associated Y4 pseudogene 19; RNA, Ro-associated Y3; hypothetical LOC100132111; RNA, Ro-associated Y4
8166349	LOC100271832	Homo sapiens	hypothetical LOC100271832; RNA, Ro-associated Y5 pseudogene 10; RNA, Ro-associated Y1; RNA, Ro-associated Y4 pseudogene 7; RNA, Ro-associated Y4 pseudogene 19; RNA, Ro-associated Y3; hypothetical LOC100132111; RNA, Ro-associated Y4
8166349	RNY5P10	Homo sapiens	hypothetical LOC100271832; RNA, Ro-associated Y5 pseudogene 10; RNA, Ro-associated Y1; RNA, Ro-associated Y4 pseudogene 7; RNA, Ro-associated Y4 pseudogene 19; RNA, Ro-associated Y3; hypothetical LOC100132111; RNA, Ro-associated Y4
8166349	RNY1	Homo sapiens	hypothetical LOC100271832; RNA, Ro-associated Y5 pseudogene 10; RNA, Ro-associated Y1; RNA, Ro-associated Y4 pseudogene 7; RNA, Ro-associated Y4 pseudogene 19; RNA, Ro-associated Y3; hypothetical LOC100132111; RNA, Ro-associated Y4
8166349	LOC100132111	Homo sapiens	hypothetical LOC100271832; RNA, Ro-associated Y5 pseudogene 10; RNA, Ro-associated Y1; RNA, Ro-associated Y4 pseudogene 7; RNA, Ro-associated Y4 pseudogene 19; RNA, Ro-associated Y3; hypothetical LOC100132111; RNA, Ro-associated Y4
8166349	RNY4P19	Homo sapiens	hypothetical LOC100271832; RNA, Ro-associated Y5 pseudogene 10; RNA, Ro-associated Y1; RNA, Ro-associated Y4 pseudogene 7; RNA, Ro-associated Y4 pseudogene 19; RNA, Ro-associated Y3; hypothetical LOC100132111; RNA, Ro-associated Y4
8166349	RNY3	Homo sapiens	hypothetical LOC100271832; RNA, Ro-associated Y5 pseudogene 10; RNA, Ro-associated Y1; RNA, Ro-associated Y4 pseudogene 7; RNA, Ro-associated Y4 pseudogene 19; RNA, Ro-associated Y3; hypothetical LOC100132111; RNA, Ro-associated Y4
8166349	RNY4	Homo sapiens	hypothetical LOC100271832; RNA, Ro-associated Y5 pseudogene 10; RNA, Ro-associated Y1; RNA, Ro-associated Y4 pseudogene 7; RNA, Ro-associated Y4 pseudogene 19; RNA, Ro-associated Y3; hypothetical LOC100132111; RNA, Ro-associated Y4
8155591	ANKRD20B	Homo sapiens	ankyrin repeat domain 20 family, member A2 pseudogene; ankyrin repeat domain 20B; ankyrin repeat domain 20 family, member A4
8155591	ANKRD20A4	Homo sapiens	ankyrin repeat domain 20 family, member A2 pseudogene; ankyrin repeat domain 20B; ankyrin repeat domain 20 family, member A4
8155591	LOC284232	Homo sapiens	ankyrin repeat domain 20 family, member A2 pseudogene; ankyrin repeat domain 20B; ankyrin repeat domain 20 family, member A4
8083183	SR140	Homo sapiens	U2-associated SR140 protein
7939928	OR4P4	Homo sapiens	olfactory receptor, family 4, subfamily P, member 4
8012469	RPL26P33	Homo sapiens	ribosomal protein L26 pseudogene 33; ribosomal protein L26; ribosomal protein L26 pseudogene 16; ribosomal protein L26 pseudogene 19; ribosomal protein L26 pseudogene 6
8012469	RPL26	Homo sapiens	ribosomal protein L26 pseudogene 33; ribosomal protein L26; ribosomal protein L26 pseudogene 16; ribosomal protein L26 pseudogene 19; ribosomal protein L26 pseudogene 6
8012469	RPL26P19	Homo sapiens	ribosomal protein L26 pseudogene 33; ribosomal protein L26; ribosomal protein L26 pseudogene 16; ribosomal protein L26 pseudogene 19; ribosomal protein L26 pseudogene 6
8012469	RPL26P6	Homo sapiens	ribosomal protein L26 pseudogene 33; ribosomal protein L26; ribosomal protein L26 pseudogene 16; ribosomal protein L26 pseudogene 19; ribosomal protein L26 pseudogene 6
8012469	RPL26P16	Homo sapiens	ribosomal protein L26 pseudogene 33; ribosomal protein L26; ribosomal protein L26 pseudogene 16; ribosomal protein L26 pseudogene 19; ribosomal protein L26 pseudogene 6
7894838	ARF3	Homo sapiens	ADP-ribosylation factor 3
8173513	RPS4XP13	Homo sapiens	ribosomal protein S4X pseudogene 6; ribosomal protein S4X pseudogene 13; ribosomal protein S4, X-linked
8173513	rps4x	Homo sapiens	ribosomal protein S4X pseudogene 6; ribosomal protein S4X pseudogene 13; ribosomal protein S4, X-linked
8173513	RPS4XP6	Homo sapiens	ribosomal protein S4X pseudogene 6; ribosomal protein S4X pseudogene 13; ribosomal protein S4, X-linked
8120249	rn7sk	Homo sapiens	RNA, 7SK small nuclear
7909768	SPATA17	Homo sapiens	spermatogenesis associated 17
7893309	RPL12P1	Homo sapiens	ribosomal protein L12 pseudogene 1
7979307	DLGAP5	Homo sapiens	discs, large (Drosophila) homolog-associated protein 5
8107129	SLCO4C1	Homo sapiens	solute carrier organic anion transporter family, member 4C1
7930470	SHOC2	Homo sapiens	soc-2 suppressor of clear homolog (C. elegans)
8091340	RNU6-2	Homo sapiens	RNA, U6 small nuclear 2; RNA, U6 small nuclear 1
8091340	RNU6-1	Homo sapiens	RNA, U6 small nuclear 2; RNA, U6 small nuclear 1
7894827	C1DP2	Homo sapiens	C1D nuclear receptor co-repressor; similar to nuclear DNA-binding protein; similar to hCG1791993
7894827	C1DP3	Homo sapiens	C1D nuclear receptor co-repressor; similar to nuclear DNA-binding protein; similar to hCG1791993
7894827	C1D	Homo sapiens	C1D nuclear receptor co-repressor; similar to nuclear DNA-binding protein; similar to hCG1791993
8173501	RNU6-2	Homo sapiens	RNA, U6 small nuclear 2; RNA, U6 small nuclear 1
8173501	RNU6-1	Homo sapiens	RNA, U6 small nuclear 2; RNA, U6 small nuclear 1
8149377	DEFB130	Homo sapiens	defensin, beta 130; similar to beta-defensin 130
8149377	LOC729523	Homo sapiens	defensin, beta 130; similar to beta-defensin 130
8149377	LOC100133267	Homo sapiens	defensin, beta 130; similar to beta-defensin 130
8171834	rpl9	Homo sapiens	ribosomal protein L9; ribosomal protein L9 pseudogene 25
8171834	RPL9P25	Homo sapiens	ribosomal protein L9; ribosomal protein L9 pseudogene 25
8169634	RNU1-5	Homo sapiens	RNA, U1F1 small nuclear; RNA, U1C2 small nuclear; RNA, U1G2 small nuclear; RNA, U1C1 small nuclear; RNA, U1G3 small nuclear; RNA, U1A3 small nuclear; RNA, U1G1 small nuclear; RNA, U1A small nuclear
8169634	RNU1-8	Homo sapiens	RNA, U1F1 small nuclear; RNA, U1C2 small nuclear; RNA, U1G2 small nuclear; RNA, U1C1 small nuclear; RNA, U1G3 small nuclear; RNA, U1A3 small nuclear; RNA, U1G1 small nuclear; RNA, U1A small nuclear
8169634	RNU1-7	Homo sapiens	RNA, U1F1 small nuclear; RNA, U1C2 small nuclear; RNA, U1G2 small nuclear; RNA, U1C1 small nuclear; RNA, U1G3 small nuclear; RNA, U1A3 small nuclear; RNA, U1G1 small nuclear; RNA, U1A small nuclear
8169634	RNU1-9	Homo sapiens	RNA, U1F1 small nuclear; RNA, U1C2 small nuclear; RNA, U1G2 small nuclear; RNA, U1C1 small nuclear; RNA, U1G3 small nuclear; RNA, U1A3 small nuclear; RNA, U1G1 small nuclear; RNA, U1A small nuclear
8169634	RNU1-3	Homo sapiens	RNA, U1F1 small nuclear; RNA, U1C2 small nuclear; RNA, U1G2 small nuclear; RNA, U1C1 small nuclear; RNA, U1G3 small nuclear; RNA, U1A3 small nuclear; RNA, U1G1 small nuclear; RNA, U1A small nuclear
8169634	RNU1-4	Homo sapiens	RNA, U1F1 small nuclear; RNA, U1C2 small nuclear; RNA, U1G2 small nuclear; RNA, U1C1 small nuclear; RNA, U1G3 small nuclear; RNA, U1A3 small nuclear; RNA, U1G1 small nuclear; RNA, U1A small nuclear
8169634	RNU1-1	Homo sapiens	RNA, U1F1 small nuclear; RNA, U1C2 small nuclear; RNA, U1G2 small nuclear; RNA, U1C1 small nuclear; RNA, U1G3 small nuclear; RNA, U1A3 small nuclear; RNA, U1G1 small nuclear; RNA, U1A small nuclear
8169634	RNU1-2	Homo sapiens	RNA, U1F1 small nuclear; RNA, U1C2 small nuclear; RNA, U1G2 small nuclear; RNA, U1C1 small nuclear; RNA, U1G3 small nuclear; RNA, U1A3 small nuclear; RNA, U1G1 small nuclear; RNA, U1A small nuclear
8127776	LOC100131508	Homo sapiens	PRO2122
8161499	LOC100132439	Homo sapiens	family with sequence similarity 27, member E3; family with sequence similarity 27, member E2; family with sequence similarity 27, member E1; similar to Protein FAM27E2
8161499	FAM27E3	Homo sapiens	family with sequence similarity 27, member E3; family with sequence similarity 27, member E2; family with sequence similarity 27, member E1; similar to Protein FAM27E2
7932792	RN5S10	Homo sapiens	RNA, 5S ribosomal 9; RNA, 5S ribosomal 13; RNA, 5S ribosomal 12; RNA, 5S ribosomal 11; RNA, 5S ribosomal 10; RNA, 5S ribosomal 17; RNA, 5S ribosomal 16; RNA, 5S ribosomal 15; RNA, 5S ribosomal 14; RNA, 5S ribosomal 1; RNA, 5S ribosomal 2; RNA, 5S ribosomal 3; RNA, 5S ribosomal 4; RNA, 5S ribosomal 5; RNA, 5S ribosomal 6; RNA, 5S ribosomal 7; RNA, 5S ribosomal 8
7932792	RN5S11	Homo sapiens	RNA, 5S ribosomal 9; RNA, 5S ribosomal 13; RNA, 5S ribosomal 12; RNA, 5S ribosomal 11; RNA, 5S ribosomal 10; RNA, 5S ribosomal 17; RNA, 5S ribosomal 16; RNA, 5S ribosomal 15; RNA, 5S ribosomal 14; RNA, 5S ribosomal 1; RNA, 5S ribosomal 2; RNA, 5S ribosomal 3; RNA, 5S ribosomal 4; RNA, 5S ribosomal 5; RNA, 5S ribosomal 6; RNA, 5S ribosomal 7; RNA, 5S ribosomal 8
7932792	RN5S12	Homo sapiens	RNA, 5S ribosomal 9; RNA, 5S ribosomal 13; RNA, 5S ribosomal 12; RNA, 5S ribosomal 11; RNA, 5S ribosomal 10; RNA, 5S ribosomal 17; RNA, 5S ribosomal 16; RNA, 5S ribosomal 15; RNA, 5S ribosomal 14; RNA, 5S ribosomal 1; RNA, 5S ribosomal 2; RNA, 5S ribosomal 3; RNA, 5S ribosomal 4; RNA, 5S ribosomal 5; RNA, 5S ribosomal 6; RNA, 5S ribosomal 7; RNA, 5S ribosomal 8
7932792	RN5S13	Homo sapiens	RNA, 5S ribosomal 9; RNA, 5S ribosomal 13; RNA, 5S ribosomal 12; RNA, 5S ribosomal 11; RNA, 5S ribosomal 10; RNA, 5S ribosomal 17; RNA, 5S ribosomal 16; RNA, 5S ribosomal 15; RNA, 5S ribosomal 14; RNA, 5S ribosomal 1; RNA, 5S ribosomal 2; RNA, 5S ribosomal 3; RNA, 5S ribosomal 4; RNA, 5S ribosomal 5; RNA, 5S ribosomal 6; RNA, 5S ribosomal 7; RNA, 5S ribosomal 8
7932792	RN5S14	Homo sapiens	RNA, 5S ribosomal 9; RNA, 5S ribosomal 13; RNA, 5S ribosomal 12; RNA, 5S ribosomal 11; RNA, 5S ribosomal 10; RNA, 5S ribosomal 17; RNA, 5S ribosomal 16; RNA, 5S ribosomal 15; RNA, 5S ribosomal 14; RNA, 5S ribosomal 1; RNA, 5S ribosomal 2; RNA, 5S ribosomal 3; RNA, 5S ribosomal 4; RNA, 5S ribosomal 5; RNA, 5S ribosomal 6; RNA, 5S ribosomal 7; RNA, 5S ribosomal 8
7932792	RN5S15	Homo sapiens	RNA, 5S ribosomal 9; RNA, 5S ribosomal 13; RNA, 5S ribosomal 12; RNA, 5S ribosomal 11; RNA, 5S ribosomal 10; RNA, 5S ribosomal 17; RNA, 5S ribosomal 16; RNA, 5S ribosomal 15; RNA, 5S ribosomal 14; RNA, 5S ribosomal 1; RNA, 5S ribosomal 2; RNA, 5S ribosomal 3; RNA, 5S ribosomal 4; RNA, 5S ribosomal 5; RNA, 5S ribosomal 6; RNA, 5S ribosomal 7; RNA, 5S ribosomal 8
7932792	RN5S16	Homo sapiens	RNA, 5S ribosomal 9; RNA, 5S ribosomal 13; RNA, 5S ribosomal 12; RNA, 5S ribosomal 11; RNA, 5S ribosomal 10; RNA, 5S ribosomal 17; RNA, 5S ribosomal 16; RNA, 5S ribosomal 15; RNA, 5S ribosomal 14; RNA, 5S ribosomal 1; RNA, 5S ribosomal 2; RNA, 5S ribosomal 3; RNA, 5S ribosomal 4; RNA, 5S ribosomal 5; RNA, 5S ribosomal 6; RNA, 5S ribosomal 7; RNA, 5S ribosomal 8
7932792	RN5S6	Homo sapiens	RNA, 5S ribosomal 9; RNA, 5S ribosomal 13; RNA, 5S ribosomal 12; RNA, 5S ribosomal 11; RNA, 5S ribosomal 10; RNA, 5S ribosomal 17; RNA, 5S ribosomal 16; RNA, 5S ribosomal 15; RNA, 5S ribosomal 14; RNA, 5S ribosomal 1; RNA, 5S ribosomal 2; RNA, 5S ribosomal 3; RNA, 5S ribosomal 4; RNA, 5S ribosomal 5; RNA, 5S ribosomal 6; RNA, 5S ribosomal 7; RNA, 5S ribosomal 8
7932792	RN5S7	Homo sapiens	RNA, 5S ribosomal 9; RNA, 5S ribosomal 13; RNA, 5S ribosomal 12; RNA, 5S ribosomal 11; RNA, 5S ribosomal 10; RNA, 5S ribosomal 17; RNA, 5S ribosomal 16; RNA, 5S ribosomal 15; RNA, 5S ribosomal 14; RNA, 5S ribosomal 1; RNA, 5S ribosomal 2; RNA, 5S ribosomal 3; RNA, 5S ribosomal 4; RNA, 5S ribosomal 5; RNA, 5S ribosomal 6; RNA, 5S ribosomal 7; RNA, 5S ribosomal 8
7932792	RN5S8	Homo sapiens	RNA, 5S ribosomal 9; RNA, 5S ribosomal 13; RNA, 5S ribosomal 12; RNA, 5S ribosomal 11; RNA, 5S ribosomal 10; RNA, 5S ribosomal 17; RNA, 5S ribosomal 16; RNA, 5S ribosomal 15; RNA, 5S ribosomal 14; RNA, 5S ribosomal 1; RNA, 5S ribosomal 2; RNA, 5S ribosomal 3; RNA, 5S ribosomal 4; RNA, 5S ribosomal 5; RNA, 5S ribosomal 6; RNA, 5S ribosomal 7; RNA, 5S ribosomal 8
7932792	RN5S9	Homo sapiens	RNA, 5S ribosomal 9; RNA, 5S ribosomal 13; RNA, 5S ribosomal 12; RNA, 5S ribosomal 11; RNA, 5S ribosomal 10; RNA, 5S ribosomal 17; RNA, 5S ribosomal 16; RNA, 5S ribosomal 15; RNA, 5S ribosomal 14; RNA, 5S ribosomal 1; RNA, 5S ribosomal 2; RNA, 5S ribosomal 3; RNA, 5S ribosomal 4; RNA, 5S ribosomal 5; RNA, 5S ribosomal 6; RNA, 5S ribosomal 7; RNA, 5S ribosomal 8
7932792	RN5S2	Homo sapiens	RNA, 5S ribosomal 9; RNA, 5S ribosomal 13; RNA, 5S ribosomal 12; RNA, 5S ribosomal 11; RNA, 5S ribosomal 10; RNA, 5S ribosomal 17; RNA, 5S ribosomal 16; RNA, 5S ribosomal 15; RNA, 5S ribosomal 14; RNA, 5S ribosomal 1; RNA, 5S ribosomal 2; RNA, 5S ribosomal 3; RNA, 5S ribosomal 4; RNA, 5S ribosomal 5; RNA, 5S ribosomal 6; RNA, 5S ribosomal 7; RNA, 5S ribosomal 8
7932792	RN5S3	Homo sapiens	RNA, 5S ribosomal 9; RNA, 5S ribosomal 13; RNA, 5S ribosomal 12; RNA, 5S ribosomal 11; RNA, 5S ribosomal 10; RNA, 5S ribosomal 17; RNA, 5S ribosomal 16; RNA, 5S ribosomal 15; RNA, 5S ribosomal 14; RNA, 5S ribosomal 1; RNA, 5S ribosomal 2; RNA, 5S ribosomal 3; RNA, 5S ribosomal 4; RNA, 5S ribosomal 5; RNA, 5S ribosomal 6; RNA, 5S ribosomal 7; RNA, 5S ribosomal 8
7932792	RN5S4	Homo sapiens	RNA, 5S ribosomal 9; RNA, 5S ribosomal 13; RNA, 5S ribosomal 12; RNA, 5S ribosomal 11; RNA, 5S ribosomal 10; RNA, 5S ribosomal 17; RNA, 5S ribosomal 16; RNA, 5S ribosomal 15; RNA, 5S ribosomal 14; RNA, 5S ribosomal 1; RNA, 5S ribosomal 2; RNA, 5S ribosomal 3; RNA, 5S ribosomal 4; RNA, 5S ribosomal 5; RNA, 5S ribosomal 6; RNA, 5S ribosomal 7; RNA, 5S ribosomal 8
7932792	RN5S5	Homo sapiens	RNA, 5S ribosomal 9; RNA, 5S ribosomal 13; RNA, 5S ribosomal 12; RNA, 5S ribosomal 11; RNA, 5S ribosomal 10; RNA, 5S ribosomal 17; RNA, 5S ribosomal 16; RNA, 5S ribosomal 15; RNA, 5S ribosomal 14; RNA, 5S ribosomal 1; RNA, 5S ribosomal 2; RNA, 5S ribosomal 3; RNA, 5S ribosomal 4; RNA, 5S ribosomal 5; RNA, 5S ribosomal 6; RNA, 5S ribosomal 7; RNA, 5S ribosomal 8
7932792	RN5S1	Homo sapiens	RNA, 5S ribosomal 9; RNA, 5S ribosomal 13; RNA, 5S ribosomal 12; RNA, 5S ribosomal 11; RNA, 5S ribosomal 10; RNA, 5S ribosomal 17; RNA, 5S ribosomal 16; RNA, 5S ribosomal 15; RNA, 5S ribosomal 14; RNA, 5S ribosomal 1; RNA, 5S ribosomal 2; RNA, 5S ribosomal 3; RNA, 5S ribosomal 4; RNA, 5S ribosomal 5; RNA, 5S ribosomal 6; RNA, 5S ribosomal 7; RNA, 5S ribosomal 8
7932792	RN5S17	Homo sapiens	RNA, 5S ribosomal 9; RNA, 5S ribosomal 13; RNA, 5S ribosomal 12; RNA, 5S ribosomal 11; RNA, 5S ribosomal 10; RNA, 5S ribosomal 17; RNA, 5S ribosomal 16; RNA, 5S ribosomal 15; RNA, 5S ribosomal 14; RNA, 5S ribosomal 1; RNA, 5S ribosomal 2; RNA, 5S ribosomal 3; RNA, 5S ribosomal 4; RNA, 5S ribosomal 5; RNA, 5S ribosomal 6; RNA, 5S ribosomal 7; RNA, 5S ribosomal 8
8178193	HLA-DRA	Homo sapiens	major histocompatibility complex, class II, DR alpha
7967896	pbrm1	Homo sapiens	polybromo 1
8138553	FAM126A	Homo sapiens	family with sequence similarity 126, member A
7923007	UCHL5	Homo sapiens	ubiquitin carboxyl-terminal hydrolase L5
8175664	RN5S10	Homo sapiens	RNA, 5S ribosomal 9; RNA, 5S ribosomal 13; RNA, 5S ribosomal 12; RNA, 5S ribosomal 11; RNA, 5S ribosomal 10; RNA, 5S ribosomal 17; RNA, 5S ribosomal 16; RNA, 5S ribosomal 15; RNA, 5S ribosomal 14; RNA, 5S ribosomal 1; RNA, 5S ribosomal 2; RNA, 5S ribosomal 3; RNA, 5S ribosomal 4; RNA, 5S ribosomal 5; RNA, 5S ribosomal 6; RNA, 5S ribosomal 7; RNA, 5S ribosomal 8
8175664	RN5S11	Homo sapiens	RNA, 5S ribosomal 9; RNA, 5S ribosomal 13; RNA, 5S ribosomal 12; RNA, 5S ribosomal 11; RNA, 5S ribosomal 10; RNA, 5S ribosomal 17; RNA, 5S ribosomal 16; RNA, 5S ribosomal 15; RNA, 5S ribosomal 14; RNA, 5S ribosomal 1; RNA, 5S ribosomal 2; RNA, 5S ribosomal 3; RNA, 5S ribosomal 4; RNA, 5S ribosomal 5; RNA, 5S ribosomal 6; RNA, 5S ribosomal 7; RNA, 5S ribosomal 8
8175664	RN5S12	Homo sapiens	RNA, 5S ribosomal 9; RNA, 5S ribosomal 13; RNA, 5S ribosomal 12; RNA, 5S ribosomal 11; RNA, 5S ribosomal 10; RNA, 5S ribosomal 17; RNA, 5S ribosomal 16; RNA, 5S ribosomal 15; RNA, 5S ribosomal 14; RNA, 5S ribosomal 1; RNA, 5S ribosomal 2; RNA, 5S ribosomal 3; RNA, 5S ribosomal 4; RNA, 5S ribosomal 5; RNA, 5S ribosomal 6; RNA, 5S ribosomal 7; RNA, 5S ribosomal 8
8175664	RN5S13	Homo sapiens	RNA, 5S ribosomal 9; RNA, 5S ribosomal 13; RNA, 5S ribosomal 12; RNA, 5S ribosomal 11; RNA, 5S ribosomal 10; RNA, 5S ribosomal 17; RNA, 5S ribosomal 16; RNA, 5S ribosomal 15; RNA, 5S ribosomal 14; RNA, 5S ribosomal 1; RNA, 5S ribosomal 2; RNA, 5S ribosomal 3; RNA, 5S ribosomal 4; RNA, 5S ribosomal 5; RNA, 5S ribosomal 6; RNA, 5S ribosomal 7; RNA, 5S ribosomal 8
8175664	RN5S14	Homo sapiens	RNA, 5S ribosomal 9; RNA, 5S ribosomal 13; RNA, 5S ribosomal 12; RNA, 5S ribosomal 11; RNA, 5S ribosomal 10; RNA, 5S ribosomal 17; RNA, 5S ribosomal 16; RNA, 5S ribosomal 15; RNA, 5S ribosomal 14; RNA, 5S ribosomal 1; RNA, 5S ribosomal 2; RNA, 5S ribosomal 3; RNA, 5S ribosomal 4; RNA, 5S ribosomal 5; RNA, 5S ribosomal 6; RNA, 5S ribosomal 7; RNA, 5S ribosomal 8
8175664	RN5S15	Homo sapiens	RNA, 5S ribosomal 9; RNA, 5S ribosomal 13; RNA, 5S ribosomal 12; RNA, 5S ribosomal 11; RNA, 5S ribosomal 10; RNA, 5S ribosomal 17; RNA, 5S ribosomal 16; RNA, 5S ribosomal 15; RNA, 5S ribosomal 14; RNA, 5S ribosomal 1; RNA, 5S ribosomal 2; RNA, 5S ribosomal 3; RNA, 5S ribosomal 4; RNA, 5S ribosomal 5; RNA, 5S ribosomal 6; RNA, 5S ribosomal 7; RNA, 5S ribosomal 8
8175664	RN5S16	Homo sapiens	RNA, 5S ribosomal 9; RNA, 5S ribosomal 13; RNA, 5S ribosomal 12; RNA, 5S ribosomal 11; RNA, 5S ribosomal 10; RNA, 5S ribosomal 17; RNA, 5S ribosomal 16; RNA, 5S ribosomal 15; RNA, 5S ribosomal 14; RNA, 5S ribosomal 1; RNA, 5S ribosomal 2; RNA, 5S ribosomal 3; RNA, 5S ribosomal 4; RNA, 5S ribosomal 5; RNA, 5S ribosomal 6; RNA, 5S ribosomal 7; RNA, 5S ribosomal 8
8175664	RN5S6	Homo sapiens	RNA, 5S ribosomal 9; RNA, 5S ribosomal 13; RNA, 5S ribosomal 12; RNA, 5S ribosomal 11; RNA, 5S ribosomal 10; RNA, 5S ribosomal 17; RNA, 5S ribosomal 16; RNA, 5S ribosomal 15; RNA, 5S ribosomal 14; RNA, 5S ribosomal 1; RNA, 5S ribosomal 2; RNA, 5S ribosomal 3; RNA, 5S ribosomal 4; RNA, 5S ribosomal 5; RNA, 5S ribosomal 6; RNA, 5S ribosomal 7; RNA, 5S ribosomal 8
8175664	RN5S7	Homo sapiens	RNA, 5S ribosomal 9; RNA, 5S ribosomal 13; RNA, 5S ribosomal 12; RNA, 5S ribosomal 11; RNA, 5S ribosomal 10; RNA, 5S ribosomal 17; RNA, 5S ribosomal 16; RNA, 5S ribosomal 15; RNA, 5S ribosomal 14; RNA, 5S ribosomal 1; RNA, 5S ribosomal 2; RNA, 5S ribosomal 3; RNA, 5S ribosomal 4; RNA, 5S ribosomal 5; RNA, 5S ribosomal 6; RNA, 5S ribosomal 7; RNA, 5S ribosomal 8
8175664	RN5S8	Homo sapiens	RNA, 5S ribosomal 9; RNA, 5S ribosomal 13; RNA, 5S ribosomal 12; RNA, 5S ribosomal 11; RNA, 5S ribosomal 10; RNA, 5S ribosomal 17; RNA, 5S ribosomal 16; RNA, 5S ribosomal 15; RNA, 5S ribosomal 14; RNA, 5S ribosomal 1; RNA, 5S ribosomal 2; RNA, 5S ribosomal 3; RNA, 5S ribosomal 4; RNA, 5S ribosomal 5; RNA, 5S ribosomal 6; RNA, 5S ribosomal 7; RNA, 5S ribosomal 8
8175664	RN5S9	Homo sapiens	RNA, 5S ribosomal 9; RNA, 5S ribosomal 13; RNA, 5S ribosomal 12; RNA, 5S ribosomal 11; RNA, 5S ribosomal 10; RNA, 5S ribosomal 17; RNA, 5S ribosomal 16; RNA, 5S ribosomal 15; RNA, 5S ribosomal 14; RNA, 5S ribosomal 1; RNA, 5S ribosomal 2; RNA, 5S ribosomal 3; RNA, 5S ribosomal 4; RNA, 5S ribosomal 5; RNA, 5S ribosomal 6; RNA, 5S ribosomal 7; RNA, 5S ribosomal 8
8175664	RN5S2	Homo sapiens	RNA, 5S ribosomal 9; RNA, 5S ribosomal 13; RNA, 5S ribosomal 12; RNA, 5S ribosomal 11; RNA, 5S ribosomal 10; RNA, 5S ribosomal 17; RNA, 5S ribosomal 16; RNA, 5S ribosomal 15; RNA, 5S ribosomal 14; RNA, 5S ribosomal 1; RNA, 5S ribosomal 2; RNA, 5S ribosomal 3; RNA, 5S ribosomal 4; RNA, 5S ribosomal 5; RNA, 5S ribosomal 6; RNA, 5S ribosomal 7; RNA, 5S ribosomal 8
8175664	RN5S3	Homo sapiens	RNA, 5S ribosomal 9; RNA, 5S ribosomal 13; RNA, 5S ribosomal 12; RNA, 5S ribosomal 11; RNA, 5S ribosomal 10; RNA, 5S ribosomal 17; RNA, 5S ribosomal 16; RNA, 5S ribosomal 15; RNA, 5S ribosomal 14; RNA, 5S ribosomal 1; RNA, 5S ribosomal 2; RNA, 5S ribosomal 3; RNA, 5S ribosomal 4; RNA, 5S ribosomal 5; RNA, 5S ribosomal 6; RNA, 5S ribosomal 7; RNA, 5S ribosomal 8
8175664	RN5S4	Homo sapiens	RNA, 5S ribosomal 9; RNA, 5S ribosomal 13; RNA, 5S ribosomal 12; RNA, 5S ribosomal 11; RNA, 5S ribosomal 10; RNA, 5S ribosomal 17; RNA, 5S ribosomal 16; RNA, 5S ribosomal 15; RNA, 5S ribosomal 14; RNA, 5S ribosomal 1; RNA, 5S ribosomal 2; RNA, 5S ribosomal 3; RNA, 5S ribosomal 4; RNA, 5S ribosomal 5; RNA, 5S ribosomal 6; RNA, 5S ribosomal 7; RNA, 5S ribosomal 8
8175664	RN5S5	Homo sapiens	RNA, 5S ribosomal 9; RNA, 5S ribosomal 13; RNA, 5S ribosomal 12; RNA, 5S ribosomal 11; RNA, 5S ribosomal 10; RNA, 5S ribosomal 17; RNA, 5S ribosomal 16; RNA, 5S ribosomal 15; RNA, 5S ribosomal 14; RNA, 5S ribosomal 1; RNA, 5S ribosomal 2; RNA, 5S ribosomal 3; RNA, 5S ribosomal 4; RNA, 5S ribosomal 5; RNA, 5S ribosomal 6; RNA, 5S ribosomal 7; RNA, 5S ribosomal 8
8175664	RN5S1	Homo sapiens	RNA, 5S ribosomal 9; RNA, 5S ribosomal 13; RNA, 5S ribosomal 12; RNA, 5S ribosomal 11; RNA, 5S ribosomal 10; RNA, 5S ribosomal 17; RNA, 5S ribosomal 16; RNA, 5S ribosomal 15; RNA, 5S ribosomal 14; RNA, 5S ribosomal 1; RNA, 5S ribosomal 2; RNA, 5S ribosomal 3; RNA, 5S ribosomal 4; RNA, 5S ribosomal 5; RNA, 5S ribosomal 6; RNA, 5S ribosomal 7; RNA, 5S ribosomal 8
8175664	RN5S17	Homo sapiens	RNA, 5S ribosomal 9; RNA, 5S ribosomal 13; RNA, 5S ribosomal 12; RNA, 5S ribosomal 11; RNA, 5S ribosomal 10; RNA, 5S ribosomal 17; RNA, 5S ribosomal 16; RNA, 5S ribosomal 15; RNA, 5S ribosomal 14; RNA, 5S ribosomal 1; RNA, 5S ribosomal 2; RNA, 5S ribosomal 3; RNA, 5S ribosomal 4; RNA, 5S ribosomal 5; RNA, 5S ribosomal 6; RNA, 5S ribosomal 7; RNA, 5S ribosomal 8
8178598	CLIC1	Homo sapiens	chloride intracellular channel 1
8097062	RNU6-2	Homo sapiens	RNA, U6 small nuclear 2; RNA, U6 small nuclear 1
8097062	RNU6-1	Homo sapiens	RNA, U6 small nuclear 2; RNA, U6 small nuclear 1
7951865	APOA1	Homo sapiens	apolipoprotein A-I
8127787	Ibtk	Homo sapiens	inhibitor of Bruton agammaglobulinemia tyrosine kinase
8111214	LOC391747	Homo sapiens	similar to hCG1807616; similar to TBP-associated factor 11; TBP-associated factor 11 pseudogene; similar to TAF11 RNA polymerase II, TATA box binding protein (TBP)-associated factor; similar to hCG1809904
8111214	LOC391746	Homo sapiens	similar to hCG1807616; similar to TBP-associated factor 11; TBP-associated factor 11 pseudogene; similar to TAF11 RNA polymerase II, TATA box binding protein (TBP)-associated factor; similar to hCG1809904
8111214	LOC391764	Homo sapiens	similar to hCG1807616; similar to TBP-associated factor 11; TBP-associated factor 11 pseudogene; similar to TAF11 RNA polymerase II, TATA box binding protein (TBP)-associated factor; similar to hCG1809904
8111214	LOC646066	Homo sapiens	similar to hCG1807616; similar to TBP-associated factor 11; TBP-associated factor 11 pseudogene; similar to TAF11 RNA polymerase II, TATA box binding protein (TBP)-associated factor; similar to hCG1809904
8111214	LOC391763	Homo sapiens	similar to hCG1807616; similar to TBP-associated factor 11; TBP-associated factor 11 pseudogene; similar to TAF11 RNA polymerase II, TATA box binding protein (TBP)-associated factor; similar to hCG1809904
8111214	LOC391742	Homo sapiens	similar to hCG1807616; similar to TBP-associated factor 11; TBP-associated factor 11 pseudogene; similar to TAF11 RNA polymerase II, TATA box binding protein (TBP)-associated factor; similar to hCG1809904
8111214	LOC391767	Homo sapiens	similar to hCG1807616; similar to TBP-associated factor 11; TBP-associated factor 11 pseudogene; similar to TAF11 RNA polymerase II, TATA box binding protein (TBP)-associated factor; similar to hCG1809904
8111214	LOC391766	Homo sapiens	similar to hCG1807616; similar to TBP-associated factor 11; TBP-associated factor 11 pseudogene; similar to TAF11 RNA polymerase II, TATA box binding protein (TBP)-associated factor; similar to hCG1809904
8111214	LOC646103	Homo sapiens	similar to hCG1807616; similar to TBP-associated factor 11; TBP-associated factor 11 pseudogene; similar to TAF11 RNA polymerase II, TATA box binding protein (TBP)-associated factor; similar to hCG1809904
8111214	LOC729724	Homo sapiens	similar to hCG1807616; similar to TBP-associated factor 11; TBP-associated factor 11 pseudogene; similar to TAF11 RNA polymerase II, TATA box binding protein (TBP)-associated factor; similar to hCG1809904
8111214	LOC729706	Homo sapiens	similar to hCG1807616; similar to TBP-associated factor 11; TBP-associated factor 11 pseudogene; similar to TAF11 RNA polymerase II, TATA box binding protein (TBP)-associated factor; similar to hCG1809904
8111214	LOC729711	Homo sapiens	similar to hCG1807616; similar to TBP-associated factor 11; TBP-associated factor 11 pseudogene; similar to TAF11 RNA polymerase II, TATA box binding protein (TBP)-associated factor; similar to hCG1809904
8111214	LOC402207	Homo sapiens	similar to hCG1807616; similar to TBP-associated factor 11; TBP-associated factor 11 pseudogene; similar to TAF11 RNA polymerase II, TATA box binding protein (TBP)-associated factor; similar to hCG1809904
8111214	LOC642127	Homo sapiens	similar to hCG1807616; similar to TBP-associated factor 11; TBP-associated factor 11 pseudogene; similar to TAF11 RNA polymerase II, TATA box binding protein (TBP)-associated factor; similar to hCG1809904
8111214	LOC285697	Homo sapiens	similar to hCG1807616; similar to TBP-associated factor 11; TBP-associated factor 11 pseudogene; similar to TAF11 RNA polymerase II, TATA box binding protein (TBP)-associated factor; similar to hCG1809904
7930454	PDCD4	Homo sapiens	programmed cell death 4 (neoplastic transformation inhibitor)
7968195	RNU6-2	Homo sapiens	RNA, U6 small nuclear 2; RNA, U6 small nuclear 1
7968195	RNU6-1	Homo sapiens	RNA, U6 small nuclear 2; RNA, U6 small nuclear 1
8164314	ST6GALNAC4	Homo sapiens	ST6 (alpha-N-acetyl-neuraminyl-2,3-beta-galactosyl-1,3)-N-acetylgalactosaminide alpha-2,6-sialyltransferase 4
7955810	PRR13	Homo sapiens	proline rich 13
7970381	CCDC29	Homo sapiens	coiled-coil domain containing 29
7974052	RNY4P7	Homo sapiens	hypothetical LOC100271832; RNA, Ro-associated Y5 pseudogene 10; RNA, Ro-associated Y1; RNA, Ro-associated Y4 pseudogene 7; RNA, Ro-associated Y4 pseudogene 19; RNA, Ro-associated Y3; hypothetical LOC100132111; RNA, Ro-associated Y4
7974052	LOC100271832	Homo sapiens	hypothetical LOC100271832; RNA, Ro-associated Y5 pseudogene 10; RNA, Ro-associated Y1; RNA, Ro-associated Y4 pseudogene 7; RNA, Ro-associated Y4 pseudogene 19; RNA, Ro-associated Y3; hypothetical LOC100132111; RNA, Ro-associated Y4
7974052	RNY5P10	Homo sapiens	hypothetical LOC100271832; RNA, Ro-associated Y5 pseudogene 10; RNA, Ro-associated Y1; RNA, Ro-associated Y4 pseudogene 7; RNA, Ro-associated Y4 pseudogene 19; RNA, Ro-associated Y3; hypothetical LOC100132111; RNA, Ro-associated Y4
7974052	RNY1	Homo sapiens	hypothetical LOC100271832; RNA, Ro-associated Y5 pseudogene 10; RNA, Ro-associated Y1; RNA, Ro-associated Y4 pseudogene 7; RNA, Ro-associated Y4 pseudogene 19; RNA, Ro-associated Y3; hypothetical LOC100132111; RNA, Ro-associated Y4
7974052	LOC100132111	Homo sapiens	hypothetical LOC100271832; RNA, Ro-associated Y5 pseudogene 10; RNA, Ro-associated Y1; RNA, Ro-associated Y4 pseudogene 7; RNA, Ro-associated Y4 pseudogene 19; RNA, Ro-associated Y3; hypothetical LOC100132111; RNA, Ro-associated Y4
7974052	RNY4P19	Homo sapiens	hypothetical LOC100271832; RNA, Ro-associated Y5 pseudogene 10; RNA, Ro-associated Y1; RNA, Ro-associated Y4 pseudogene 7; RNA, Ro-associated Y4 pseudogene 19; RNA, Ro-associated Y3; hypothetical LOC100132111; RNA, Ro-associated Y4
7974052	RNY3	Homo sapiens	hypothetical LOC100271832; RNA, Ro-associated Y5 pseudogene 10; RNA, Ro-associated Y1; RNA, Ro-associated Y4 pseudogene 7; RNA, Ro-associated Y4 pseudogene 19; RNA, Ro-associated Y3; hypothetical LOC100132111; RNA, Ro-associated Y4
7974052	RNY4	Homo sapiens	hypothetical LOC100271832; RNA, Ro-associated Y5 pseudogene 10; RNA, Ro-associated Y1; RNA, Ro-associated Y4 pseudogene 7; RNA, Ro-associated Y4 pseudogene 19; RNA, Ro-associated Y3; hypothetical LOC100132111; RNA, Ro-associated Y4
7930422	smc3	Homo sapiens	structural maintenance of chromosomes 3
8025011	acsbg2	Homo sapiens	acyl-CoA synthetase bubblegum family member 2
7989309	RNU6-2	Homo sapiens	RNA, U6 small nuclear 2; RNA, U6 small nuclear 1
7989309	RNU6-1	Homo sapiens	RNA, U6 small nuclear 2; RNA, U6 small nuclear 1
8163616	RNY4P7	Homo sapiens	hypothetical LOC100271832; RNA, Ro-associated Y5 pseudogene 10; RNA, Ro-associated Y1; RNA, Ro-associated Y4 pseudogene 7; RNA, Ro-associated Y4 pseudogene 19; RNA, Ro-associated Y3; hypothetical LOC100132111; RNA, Ro-associated Y4
8163616	LOC100271832	Homo sapiens	hypothetical LOC100271832; RNA, Ro-associated Y5 pseudogene 10; RNA, Ro-associated Y1; RNA, Ro-associated Y4 pseudogene 7; RNA, Ro-associated Y4 pseudogene 19; RNA, Ro-associated Y3; hypothetical LOC100132111; RNA, Ro-associated Y4
8163616	RNY5P10	Homo sapiens	hypothetical LOC100271832; RNA, Ro-associated Y5 pseudogene 10; RNA, Ro-associated Y1; RNA, Ro-associated Y4 pseudogene 7; RNA, Ro-associated Y4 pseudogene 19; RNA, Ro-associated Y3; hypothetical LOC100132111; RNA, Ro-associated Y4
8163616	RNY1	Homo sapiens	hypothetical LOC100271832; RNA, Ro-associated Y5 pseudogene 10; RNA, Ro-associated Y1; RNA, Ro-associated Y4 pseudogene 7; RNA, Ro-associated Y4 pseudogene 19; RNA, Ro-associated Y3; hypothetical LOC100132111; RNA, Ro-associated Y4
8163616	LOC100132111	Homo sapiens	hypothetical LOC100271832; RNA, Ro-associated Y5 pseudogene 10; RNA, Ro-associated Y1; RNA, Ro-associated Y4 pseudogene 7; RNA, Ro-associated Y4 pseudogene 19; RNA, Ro-associated Y3; hypothetical LOC100132111; RNA, Ro-associated Y4
8163616	RNY4P19	Homo sapiens	hypothetical LOC100271832; RNA, Ro-associated Y5 pseudogene 10; RNA, Ro-associated Y1; RNA, Ro-associated Y4 pseudogene 7; RNA, Ro-associated Y4 pseudogene 19; RNA, Ro-associated Y3; hypothetical LOC100132111; RNA, Ro-associated Y4
8163616	RNY3	Homo sapiens	hypothetical LOC100271832; RNA, Ro-associated Y5 pseudogene 10; RNA, Ro-associated Y1; RNA, Ro-associated Y4 pseudogene 7; RNA, Ro-associated Y4 pseudogene 19; RNA, Ro-associated Y3; hypothetical LOC100132111; RNA, Ro-associated Y4
8163616	RNY4	Homo sapiens	hypothetical LOC100271832; RNA, Ro-associated Y5 pseudogene 10; RNA, Ro-associated Y1; RNA, Ro-associated Y4 pseudogene 7; RNA, Ro-associated Y4 pseudogene 19; RNA, Ro-associated Y3; hypothetical LOC100132111; RNA, Ro-associated Y4
7908543	NEK7	Homo sapiens	NIMA (never in mitosis gene a)-related kinase 7
8144742	EFHA2	Homo sapiens	EF-hand domain family, member A2
8025126	LOC100134199	Homo sapiens	methyl-CpG binding domain protein 3-like 2; similar to methyl-CpG binding domain protein 3-like 2
8025126	LOC729458	Homo sapiens	methyl-CpG binding domain protein 3-like 2; similar to methyl-CpG binding domain protein 3-like 2
8025126	Mbd3l2	Homo sapiens	methyl-CpG binding domain protein 3-like 2; similar to methyl-CpG binding domain protein 3-like 2
7957161	Thap2	Homo sapiens	THAP domain containing, apoptosis associated protein 2
8042974	RNU6-2	Homo sapiens	RNA, U6 small nuclear 2; RNA, U6 small nuclear 1
8042974	RNU6-1	Homo sapiens	RNA, U6 small nuclear 2; RNA, U6 small nuclear 1
8064864	RN5-8S1	Homo sapiens	5.8S ribosomal RNA
8042976	RNU6-2	Homo sapiens	RNA, U6 small nuclear 2; RNA, U6 small nuclear 1
8042976	RNU6-1	Homo sapiens	RNA, U6 small nuclear 2; RNA, U6 small nuclear 1
8058566	RN5S10	Homo sapiens	RNA, 5S ribosomal 9; RNA, 5S ribosomal 13; RNA, 5S ribosomal 12; RNA, 5S ribosomal 11; RNA, 5S ribosomal 10; RNA, 5S ribosomal 17; RNA, 5S ribosomal 16; RNA, 5S ribosomal 15; RNA, 5S ribosomal 14; RNA, 5S ribosomal 1; RNA, 5S ribosomal 2; RNA, 5S ribosomal 3; RNA, 5S ribosomal 4; RNA, 5S ribosomal 5; RNA, 5S ribosomal 6; RNA, 5S ribosomal 7; RNA, 5S ribosomal 8
8058566	RN5S11	Homo sapiens	RNA, 5S ribosomal 9; RNA, 5S ribosomal 13; RNA, 5S ribosomal 12; RNA, 5S ribosomal 11; RNA, 5S ribosomal 10; RNA, 5S ribosomal 17; RNA, 5S ribosomal 16; RNA, 5S ribosomal 15; RNA, 5S ribosomal 14; RNA, 5S ribosomal 1; RNA, 5S ribosomal 2; RNA, 5S ribosomal 3; RNA, 5S ribosomal 4; RNA, 5S ribosomal 5; RNA, 5S ribosomal 6; RNA, 5S ribosomal 7; RNA, 5S ribosomal 8
8058566	RN5S12	Homo sapiens	RNA, 5S ribosomal 9; RNA, 5S ribosomal 13; RNA, 5S ribosomal 12; RNA, 5S ribosomal 11; RNA, 5S ribosomal 10; RNA, 5S ribosomal 17; RNA, 5S ribosomal 16; RNA, 5S ribosomal 15; RNA, 5S ribosomal 14; RNA, 5S ribosomal 1; RNA, 5S ribosomal 2; RNA, 5S ribosomal 3; RNA, 5S ribosomal 4; RNA, 5S ribosomal 5; RNA, 5S ribosomal 6; RNA, 5S ribosomal 7; RNA, 5S ribosomal 8
8058566	RN5S13	Homo sapiens	RNA, 5S ribosomal 9; RNA, 5S ribosomal 13; RNA, 5S ribosomal 12; RNA, 5S ribosomal 11; RNA, 5S ribosomal 10; RNA, 5S ribosomal 17; RNA, 5S ribosomal 16; RNA, 5S ribosomal 15; RNA, 5S ribosomal 14; RNA, 5S ribosomal 1; RNA, 5S ribosomal 2; RNA, 5S ribosomal 3; RNA, 5S ribosomal 4; RNA, 5S ribosomal 5; RNA, 5S ribosomal 6; RNA, 5S ribosomal 7; RNA, 5S ribosomal 8
8058566	RN5S14	Homo sapiens	RNA, 5S ribosomal 9; RNA, 5S ribosomal 13; RNA, 5S ribosomal 12; RNA, 5S ribosomal 11; RNA, 5S ribosomal 10; RNA, 5S ribosomal 17; RNA, 5S ribosomal 16; RNA, 5S ribosomal 15; RNA, 5S ribosomal 14; RNA, 5S ribosomal 1; RNA, 5S ribosomal 2; RNA, 5S ribosomal 3; RNA, 5S ribosomal 4; RNA, 5S ribosomal 5; RNA, 5S ribosomal 6; RNA, 5S ribosomal 7; RNA, 5S ribosomal 8
8058566	RN5S15	Homo sapiens	RNA, 5S ribosomal 9; RNA, 5S ribosomal 13; RNA, 5S ribosomal 12; RNA, 5S ribosomal 11; RNA, 5S ribosomal 10; RNA, 5S ribosomal 17; RNA, 5S ribosomal 16; RNA, 5S ribosomal 15; RNA, 5S ribosomal 14; RNA, 5S ribosomal 1; RNA, 5S ribosomal 2; RNA, 5S ribosomal 3; RNA, 5S ribosomal 4; RNA, 5S ribosomal 5; RNA, 5S ribosomal 6; RNA, 5S ribosomal 7; RNA, 5S ribosomal 8
[truncated: 1,386 more rows]
[truncated: 1 more columns]
